# Supplementary material
Source: PubMed Central journal article supplement (PMC3702686)
Supplement: NIHMS451286-supplement-Supp_table1.pdf [file NIHMS451286-supplement-Supp_table1.pdf]

Supplemental Table S1

| <b>Early</b>    | L-link | AVG  | <b>Delayed</b> | L-link | AVG  | <b>Intermed.</b> | L-link | AVG  | <b>Late</b> | L-link | AVG  |
|-----------------|--------|------|----------------|--------|------|------------------|--------|------|-------------|--------|------|
| Egr3            | 13655  | 13.0 | Ereg           | 13874  | 14.4 | Egr3             | 13655  | 12.4 | Spp1        | 20750  | 11.1 |
| Egr1            | 13653  | 12.2 | Serpine1       | 18787  | 14.0 | Egr1             | 13653  | 8.9  | Itga6       | 16403  | 9.1  |
| Nr4a1           | 15370  | 10.8 | Ilrl1          | 17082  | 9.0  | Hmga2            | 15364  | 8.3  | Hmga2       | 15364  | 8.8  |
| Btg2            | 12227  | 7.8  | Ctgf           | 14219  | 7.8  | Prkg2            | 19092  | 6.5  | Sgk         | 20393  | 7.6  |
| Egr2            | 13654  | 6.8  | Ier3           | 15937  | 7.1  | Dusp6            | 67603  | 6.3  | Slc20a1     | 20515  | 6.5  |
| Nxph1           | 18231  | 6.7  | Sgk            | 20393  | 6.7  | Sgk              | 20393  | 5.7  | Dmp1        | 13406  | 6.3  |
| Fos             | 14281  | 6.6  | F3             | 14066  | 6.6  | Spp1             | 20750  | 5.7  | Grem1       | 23892  | 5.7  |
| Ier3            | 15937  | 6.1  | Timp1          | 21857  | 6.6  | Itga6            | 16403  | 5.5  | Hmga1       | 15361  | 5.5  |
| Serpine1        | 18787  | 6.0  | Dusp6          | 67603  | 6.1  | Klf10            | 21847  | 5.3  | Prkg2       | 19092  | 5.3  |
| Cyr61           | 16007  | 5.1  | Ier5           | 15939  | 5.7  | Timp1            | 21857  | 5.2  | Fut8        | 53618  | 5.0  |
| Slamf6          | 30925  | 4.5  | Odc1           | 18263  | 4.9  | Ereg             | 13874  | 5.0  | Timp1       | 21857  | 4.7  |
| Rttm            | 246102 | 4.3  | Egr2           | 13654  | 4.3  | Foxc2            | 14234  | 4.9  | Rasa1       | 218397 | 4.7  |
| Sgk             | 20393  | 4.3  | Ptgs2          | 19225  | 4.3  | Hmga1            | 15361  | 4.4  | Dusp6       | 67603  | 4.6  |
| Ifngr1          | 15979  | 3.9  | Hbegf          | 15200  | 4.0  | Ier3             | 15937  | 4.3  | Ank         | 11732  | 4.5  |
| Ptgs2           | 19225  | 3.4  | Tnfrsf12a      | 27279  | 4.0  | Foxm2            | 14235  | 3.7  | Anxa1       | 16952  | 4.3  |
| Fgfr1op2        | 67529  | 3.3  | Nxph1          | 18231  | 3.9  | Csfl             | 12977  | 3.4  | Bdnf        | 12064  | 4.2  |
| Akp5            | 11650  | 3.3  | Itga6          | 16403  | 3.9  | Pcna             | 18538  | 3.3  | Ilrl1       | 17082  | 4.0  |
| Ctgf            | 14219  | 3.3  | Prkg2          | 19092  | 3.9  | Brcal            | 12189  | 3.2  | Ereg        | 13874  | 3.6  |
| Slc24a2         | 76376  | 3.0  | Btg2           | 12227  | 3.8  | Rasa1            | 218397 | 3.2  | Lbh         | 77889  | 3.4  |
| Zfp36           | 22695  | 3.0  | Vegfa          | ND     | 3.6  | Cdc20            | 107995 | 3.2  | Egr3        | 13655  | 3.3  |
| Folr2           | 14276  | 2.9  | Fosl2          | 14284  | 3.4  | Cdc6             | 23834  | 3.0  | Egr1        | 13653  | 3.3  |
| Dusp6           | 67603  | 2.9  | Cyr61          | 16007  | 3.0  | Odc1             | 18263  | 3.0  | Mmp13       | 17386  | 2.9  |
| Gnas            | 14683  | 2.8  | Slc20a1        | 20515  | 2.9  | E2f1             | 13555  | 3.0  | Csfl        | 12977  | 2.9  |
| Phlda1          | Phlda1 | 2.8  | Dusp1          | 19252  | 2.8  | Ccnb2            | 12442  | 2.8  | Hgf         | 15234  | 2.8  |
| Dgkz            | 104418 | 2.7  | Srf            | 20807  | 2.8  | Ier5             | 15939  | 2.8  | Odc1        | 18263  | 2.7  |
| Fosl2           | 14284  | 2.7  | Csfl           | 12977  | 2.6  | Ccnb1            | 52415  | 2.7  | Egr2        | 13654  | 2.7  |
| Csf3            | 12985  | 2.6  | Ets2           | 23872  | 2.6  | Runx1            | 12394  | 2.6  | Tnfrsf12a   | 27279  | 2.7  |
| Sost            | 74499  | 2.5  | Cav1           | 12389  | 2.5  | Hes3             | 15207  | 2.6  | Ier3        | 15937  | 2.7  |
| Ilrl1           | 17082  | 2.4  | Slamf6         | 30925  | 2.5  | Tnfrsf12a        | 27279  | 2.5  | Vegfa       | ND     | 2.5  |
| Thbs1           | 21825  | 2.4  | Anxa1          | 16952  | 2.4  | Vegfa            | ND     | 2.4  | Pcna        | 18538  | 2.4  |
| Igf1            | 16000  | 2.4  | Sost           | 74499  | 2.4  | Ecm1             | 13601  | 2.4  | Ecm1        | 13601  | 2.2  |
| Srf             | 20807  | 2.3  | Akp5           | 11650  | 2.3  | Folr2            | 14276  | 2.4  | Prkca       | 18750  | 2.1  |
| Fgf22           | 67112  | 2.1  | E2f1           | 13555  | 2.3  | Sost             | 74499  | 2.1  | Lrpl        | 16971  | 2.1  |
| Fgf4            | 14175  | 2.0  | Nfe2l2         | 18024  | 2.2  | Itgb5            | 16419  | 2.1  | Akap9       | 13121  | 2.0  |
|                 |        |      |                |        |      |                  |        |      |             |        |      |
|                 |        |      |                |        |      |                  |        |      |             |        |      |
| <b>Decrease</b> |        |      |                |        |      |                  |        |      |             |        |      |
| Hoxc12          | 15421  | 0.2  | Myo6           | 17920  | 0.3  | Slco1a4          | 28250  | 0.2  | Mest        | 17294  | 0.2  |
| Traf6           | 22034  | 0.3  | Rbbp4          | 19646  | 0.3  | Ikbkg            | 16151  | 0.2  | Npnt        | 114249 | 0.2  |
| Slc4a4          | 54403  | 0.3  | Csfr1          | 12978  | 0.4  | Rbbp4            | 19646  | 0.2  | Aspn        | 66336  | 0.3  |
| Aqp7            | 11832  | 0.3  | F2rl3          | 14065  | 0.4  | Myo6             | 17920  | 0.3  | Ogn         | 18295  | 0.3  |
| Ptgfrn          | 19221  | 0.3  | Tnfsf18        | 240873 | 0.4  | Traf6            | 22034  | 0.3  | Ncald       | 52589  | 0.3  |
| Rbbp4           | 19646  | 0.3  | Syt1           | 20979  | 0.4  | Vlrc24           | 171197 | 0.3  | Dcn         | 13179  | 0.3  |
| Uts2            | 24111  | 0.3  | Csnk1e         | 27373  | 0.4  | Aspn             | 66336  | 0.3  | Camk1g      | 215303 | 0.3  |
| Cart1           | 216285 | 0.3  | Vlrc24         | 171197 | 0.4  | Fabp5            | 16592  | 0.3  | Enpep       | 13809  | 0.3  |
| Pth             | 19226  | 0.3  | Apoc3          | 11814  | 0.4  | Ogn              | 18295  | 0.4  | Fmod        | 14264  | 0.4  |
| Tcf2            | 21410  | 0.4  | Ptgfrn         | 19221  | 0.5  | Ibsp             | 15891  | 0.4  | Fgfr2       | 14183  | 0.4  |
| Fabp5           | 16592  | 0.4  | Il7r           | 16197  | 0.5  | Npnt             | 114249 | 0.4  | Thbs1       | 21825  | 0.4  |
| Csfr1           | 12978  | 0.4  | Irf1           | 16362  | 0.5  | Pth              | 19226  | 0.4  | Cacnb2      | 12296  | 0.4  |
| Creb1           | 12912  | 0.4  | Clgn           | 12745  | 0.5  | Aqp7             | 11832  | 0.4  | Postn       | 50706  | 0.4  |
| Bcl2            | 12043  | 0.4  | Tns4           | 217169 | 0.5  | Tcf2             | 21410  | 0.4  | Bmp4        | 12159  | 0.4  |
| Ibsp            | 15891  | 0.5  | Ace            | 11421  | 0.5  | Csfr1            | 12978  | 0.5  | Col2a1      | 12824  | 0.5  |
| Il7r            | 16197  | 0.5  | Pth            | 19226  | 0.5  | Myf6             | 17878  | 0.5  | Colla1      | 12842  | 0.5  |

L-Link: Locus Link, AVG: average ratio across time points, ND=No data
