# Supplementary material
Source: PubMed Central journal article supplement (PMC3702686)
Supplement: NIHMS451286-supplement-Supp_Table3.pdf [file NIHMS451286-supplement-Supp_Table3.pdf]

Supplemental Table S3

| 1 Hour                | ratio | Assc.# | 2 Hour                | ratio | Assc.# | 8 Hour              | ratio | Assc.# | 24 hour             | ratio | Assc.# |
|-----------------------|-------|--------|-----------------------|-------|--------|---------------------|-------|--------|---------------------|-------|--------|
| HMGB1                 | 24    | P63158 | Calreticulin          | 75    | P14211 | Succinyl-CoA ligase | 53    | Q9WUM5 | CaM kinase 1D       | 90    | Q8BW96 |
| Early End. 1          | 17    | Q6DIC2 | Vimentin              | 69    | P20152 | Acyl-CoA dehydr.    | 17    | P45952 | Cytochrome C        | 30    | P00405 |
| Thioredoxin 2         | 9.5   | P97493 | TIS11B                | 18    | P23950 | CTCF                | 14    | Q61164 | NADH b5 red.        | 28    | Q9DCN2 |
| $\alpha$ 2 macroglob. | 7.3   | Q6GQT1 | CD40 Ligand           | 9.4   | P27548 | TIMP1               | 13    | P12032 | Acyl-CoA dehydr.    | 25    | P45952 |
| Egr1                  | 5.9   | P08046 | $\alpha$ 2 macroglob. | 7.3   | Q6GQT1 | TIS11B              | 12    | P23950 | Succinate dehydrg.  | 10    | Q9CQA3 |
| Emilin                | 4.2   | Q99K41 | Thioredoxin 2         | 9.7   | P97493 | LDH-A               | 4.7   | P06151 | TIS11B              | 7.6   | P32950 |
| PL Scramb. 3          | 4.1   | Q9JIZ9 | CYR61                 | 9.2   | P18406 | eIF4A-I             | 3.9   | P60843 | Filamin A           | 5.2   | Q8BTM8 |
| TIMP1                 | 3.8   | P12032 | Thrombo-2             | 8.4   | Q03350 | Cyclin D1           | 3.2   | P25322 | A-kinase anchor p8  | 4.2   | Q9DBR0 |
| NFkB p105             | 3.7   | P25799 | Early End. 1          | 7.8   | Q6DIC2 | Quinone Oxireduct.  | 3.0   | P47199 | Tnfrsf12a           | 3.7   | Q9CR75 |
| Cyclin D1             | 3.3   | P25322 | TIS11D                | 6.5   | P23949 | Prolyl 4 hydroxy    | 3.0   | Q60715 | Thrombospondin 2    | 3.5   | Q03350 |
| CYR61                 | 2.9   | P18406 | PL Scramb. 3          | 5.5   | Q9JIZ9 | Metallothionein II  | 2.8   | P02798 | Metallothionein II  | 3.1   | P02798 |
| Pygo2                 | 2.8   | Q80V76 | Filamin A             | 5.4   | Q8BTM8 | Pyruvate kinase M2  | 2.6   | P52480 | Fatty acid trans. 4 | 3.0   | Q91VE0 |
| CDK2                  | 2.7   | P97377 | Inorganic PPase       | 4.8   | Q9D819 | Elongation Factor 2 | 2.5   | P58252 | Shc binding protein | 3.0   | Q9Z179 |
| ROCK2                 | 2.6   | P70336 | Igfr                  | 4.2   | Q60751 | Glucosidase II      | 2.5   | O08795 | TIS11D              | 2.7   | P23949 |
| E-FABP                | 2.6   | Q05816 | Peroxioredoxin 2      | 4.2   | Q61171 | eIF3-3              | 2.3   | P60229 | PP2A subunit B      | 2.7   | P58389 |
| Calgizzarin           | 2.6   | P50543 | Egr2                  | 4.2   | P08152 | E-FABP              | 2.2   | Q05816 | Inorganic PPase     | 2.6   | Q9D819 |
| Thioredoxin           | 2.5   | P10639 | Egr1                  | 4.1   | P08046 | Peroxioredoxin 1    | 2.2   | P35700 | Cdc2                | 2.4   | P11440 |
| CDC2                  | 2.4   | P11440 | CTCF                  | 4.1   | Q61164 | Caspase 8           | 2.2   | O89110 | Pyruvate dehydr.    | 2.4   | Q9D051 |
| Matrix Gla-pro        | 2.4   | P19788 | Caveolin 1            | 3.8   | P49817 | Fatty acid Syn.     | 2.1   | P19096 | Pygo2               | 2.3   | Q80V76 |
| PKC alpha             | 2.4   | P20444 | Csf1                  | 3.3   | P07141 | Aldehyde Dehyd.     | 2.1   | P47739 | Nidogen             | 2.3   | P10493 |
| PP2C-alpha            | 2.3   | P49443 | Dkk3                  | 2.9   | Q9QUN9 | BMP2 ind. kinase    | 2.1   | Q91Z96 | TIMP1               | 2.2   | P12032 |
| Gelsolin              | 2.2   | P13020 | Perlecan              | 2.8   | Q05793 | Pygo2               | 2.0   | Q80V76 | Dkk3                | 2.1   | Q9QUN9 |
| 14-3-3 gamma          | 2.2   | P61982 | Calgizzarin           | 2.5   | P50543 | ROCK2               | 2.0   | P70336 | V-CAM1              | 2.0   | P29533 |
| RAb12                 | 2.2   | P35283 | Emilin 1              | 2.5   | Q99K41 | 14-3-3 epsilon      | 2.0   | P62259 | Peroxioredoxin 1    | 2.0   | P35700 |
| FGF7                  | 2.2   | P36363 | Pygo2                 | 2.4   | Q80V76 | PKC iota            | 2.0   | Q62074 | BMP2 ind. kinase    | 2.0   | Q91Z96 |
| TIS11B                | 2.1   | P23950 | E-FABP                | 2.3   | Q05816 | Rotamase            | 2.0   | Q9CR16 | Annexin A11         | 2.0   | P97384 |
| Annexin A1            | 2.0   | P10107 | Gelsolin              | 2.0   | P13020 | p164 ROCK-2         | 2.0   | P70336 | CDK4                | 2.0   | P30285 |
|                       |       |        |                       |       |        |                     |       |        |                     |       |        |
| SMC-6                 | 0.07  | Q924W5 | SMC-6                 | 0.1   | Q924W5 | SMC6                | 0.1   | Q924W5 | SMC6                | 0.2   | Q924W5 |
| N-CoR2                | 0.2   | Q9WU42 | Toll-I Rcp. 13        | 0.04  | Q6R5N8 | Vimentin            | 0.3   | P20152 | Decorin             | 0.3   | P28654 |
| IL-1R-1               | 0.2   | P13504 | P18-INK6              | 0.5   | Q60772 | Emilin 1            | 0.3   | Q99K41 | ADAMTS-1            | 0.5   | P97857 |
