# Supplementary material
Source: PubMed Central journal article supplement (PMC3702686)
Supplement: NIHMS451286-supplement-Supp_table_4.pdf [file NIHMS451286-supplement-Supp_table_4.pdf]

| Protein                                                                                    | Accession | Reference   | 60min_C | 60min_IC | 120min_ | 120min_IC | 8hr_ICAT |        | 24hr_ICAT |        | LocusLink |        |
|--------------------------------------------------------------------------------------------|-----------|-------------|---------|----------|---------|-----------|----------|--------|-----------|--------|-----------|--------|
|                                                                                            |           |             | OA      | AT_Ratio | COA     | AT_Ratio  | 8hr_COA  | _Ratio | 24hr_COA  | _Ratio |           |        |
| [3-methyl-2-oxobutanoate dehydrogenase [lipoamide]] kinase, mitochondrial precursor        | O55028    | BCKD_MOUSE  |         |          |         |           |          |        |           | 1      | 1.12      | 12041  |
| [Protein ADP-ribosylarginine] hydrolase (EC 3.2.2.19) (ADP-ribosylarginine hydrolase)      | P54923    | ADPRH_MOUSE | 1       | 1.06     |         |           |          |        |           |        |           | 11544  |
| [Pyruvate dehydrogenase [lipoamide]] kinase isozyme 4, mitochondrial precursor (EC 070571) | O70571    | PDK4_MOUSE  | 1       | 3.37     |         |           |          |        |           | 3      | 2.59      | 27273  |
| 0610016J10Rik protein (C21orf19-like protein)                                              | Q91VH6    | Q91VH6      | 6       | 1.59     | 3       | 1.27      | 3        | 1.61   |           | 7      | 1.28      |        |
| 0710005119Rik protein                                                                      | Q80VM8    | Q80VM8      |         |          |         |           |          |        |           | 1      | 5.87      |        |
| 1110001C20Rik protein                                                                      | Q80V26    | Q80V26      | 5       | 1.29     | 4       | 1.20      |          |        |           | 2      | 0.99      |        |
| 1110007A06Rik protein                                                                      | Q80YQ8    | Q80YQ8      |         |          | 1       | 0.82      |          |        |           |        |           |        |
| 1110021E09Rik protein (RIKEN cDNA 1110021E09)                                              | Q80SY5    | Q80SY5      | 3       | 1.38     |         |           | 1        | 1.38   |           |        |           |        |
| 1110033C18Rik protein                                                                      | Q99LN9    | Q99LN9      |         |          | 1       | 1.01      |          |        |           |        |           |        |
| 1110061O04Rik protein                                                                      | Q8VEL2    | Q8VEL2      | 1       | 2.22     | 1       | 0.80      | 2        | 1.05   |           |        |           |        |
| 1190005F20Rik protein (Fragment)                                                           | Q8R203    | Q8R203      | 1       | 2.53     | 1       | 3.01      | 2        | 3.32   | 3         | 1.08   |           |        |
| 130-kDa phosphatidylinositol 4,5-bisphosphate-dependent ARF1 GTPase-activating pr          | Q9QWY8    | DDEF1_MOUSE | 3       | 1.97     | 2       | 1.24      |          |        |           |        |           | 13196  |
| 14 kDa phosphohistidine phosphatase (EC 3.1.3.-) (Phosphohistidine phosphatase 1)          | Q9DAK9    | PHP14_MOUSE | 3       | 4.78     | 1       | 1.81      | 1        | 2.72   |           |        |           | 75454  |
| 14-3-3 protein beta/alpha (Protein kinase C inhibitor protein-1) (KCIP-1)                  | Q9CQV8    | 1433B_MOUSE | 2       | 1.54     |         |           |          |        |           |        |           | 54401  |
| 14-3-3 protein epsilon (14-3-3E)                                                           | P62259    | 1433E_MOUSE | 17      | 2.05     | 9       | 1.48      | 12       | 1.97   | 19        | 1.27   |           |        |
| 14-3-3 protein eta                                                                         | P68510    | 1433F_MOUSE | 3       | 1.13     | 4       | 1.49      |          |        |           | 1      | 7.87      | 22629  |
| 14-3-3 protein gamma                                                                       | P61982    | 1433G_MOUSE | 3       | 2.19     | 6       | 1.65      | 5        | 1.82   | 3         | 1.38   |           | 22628  |
| 14-3-3 protein zeta/delta (Protein kinase C inhibitor protein-1) (KCIP-1) (SEZ-2)          | P63101    | 1433Z_MOUSE | 3       | 1.53     | 2       | 1.27      | 1        | 2.20   | 2         | 1.25   |           | 22631  |
| 15 kDa selenoprotein precursor                                                             | Q9ERR7    | SEP15_MOUSE | 1       | 3.23     | 2       | 4.02      | 1        | 0.99   | 3         | 1.67   |           | 93684  |
| 1500031N24Rik protein (Fragment)                                                           | Q8R0U9    | Q8R0U9      |         |          | 1       | 1.56      |          |        |           |        |           |        |
| 1810009A16Rik protein (Fragment)                                                           | Q8CGE0    | Q8CGE0      |         |          |         |           |          |        |           | 1      | 2.85      |        |
| 1810020C19Rik protein                                                                      | Q8K1E6    | Q8K1E6      | 1       | 2.83     |         |           | 1        | 0.67   | 1         | 1.29   |           |        |
| 1810049O03Rik protein                                                                      | Q66JT1    | Q66JT1      |         |          |         |           | 1        | 19.80  |           |        |           |        |
| 1-acyl-sn-glycerol-3-phosphate acyltransferase alpha (EC 2.3.1.51) (1-AGP acyltransf       | O35083    | PLCA_MOUSE  | 1       | 1.12     |         |           |          |        |           |        |           | 55979  |
| 1-O-acylceramide synthase precursor (EC 2.3.1.-) (ACS) (Lysosomal phospholipase /          | Q8VBE4    | LYPA3_MOUSE | 4       | 1.40     | 5       | 1.07      | 1        | 0.82   |           | 1      | 0.65      | 192654 |
| 2,3'-cyclic-nucleotide 3'-phosphodiesterase (EC 3.1.4.37) (CNP) (CNPase)                   | P16330    | CN37_MOUSE  | 3       | 2.15     | 2       | 1.83      |          |        | 3         | 1.07   |           | 12799  |
| 2010311D03Rik protein                                                                      | Q99LS1    | Q99LS1      |         |          |         |           | 1        | 1.88   |           |        |           |        |
| 2310001H12Rik protein                                                                      | Q921H6    | Q921H6      |         |          | 1       | 0.19      |          |        |           |        |           |        |
| 2600003E23Rik protein                                                                      | Q80YS6    | Q80YS6      | 1       | 2.23     | 1       | 1.51      | 2        | 3.13   | 4         | 1.53   |           |        |
| 2610014M12Rik protein                                                                      | Q7TPL6    | Q7TPL6      |         |          |         |           | 1        | 0.45   |           |        |           |        |
| 2610205E22Rik protein                                                                      | Q8R2U4    | Q8R2U4      | 2       | 2.50     | 1       | 1.51      | 1        | 1.54   | 1         | 1.69   |           |        |
| 26S protease regulatory subunit 4 (P26s4) (Proteasome 26S subunit ATPase 1)                | P62192    | PRS4_MOUSE  | 4       | 0.89     | 5       | 0.83      |          |        |           |        |           | 19179  |
| 26S protease regulatory subunit 6B (MIP224) (MB67 interacting protein) (TAT-binding        | P54775    | PRS6B_MOUSE | 2       | 1.07     |         |           |          |        |           |        |           | 23996  |
| 26S protease regulatory subunit 8 (Proteasome subunit p45) (p45/SUG) (Proteasome           | P62196    | PRS8_MOUSE  | 1       | 0.81     |         |           |          |        |           |        |           | 19184  |
| 26S protease regulatory subunit S10B (Proteasome subunit p42) (Proteasome 26S s            | P62334    | PRS10_MOUSE | 4       | 1.43     | 5       | 0.74      | 5        | 2.93   | 5         | 1.15   |           | 67089  |
| 26S proteasome non-ATPase regulatory subunit 13 (26S proteasome regulatory subu            | Q9VWVJ2   | PSD13_MOUSE | 6       | 1.43     | 6       | 1.12      | 2        | 1.77   | 3         | 1.51   |           | 23997  |
| 26S proteasome non-ATPase regulatory subunit 2 (26S proteasome regulatory subun            | Q8VDM4    | PSD2_MOUSE  | 13      | 1.26     | 14      | 1.09      | 1        | 1.49   | 1         | 1.09   |           | 21762  |
| 26S proteasome non-ATPase regulatory subunit 3 (26S proteasome regulatory subun            | P14685    | PSD3_MOUSE  | 4       | 1.31     | 5       | 0.94      | 6        | 0.96   | 6         | 0.80   |           | 22123  |
| 26S proteasome non-ATPase regulatory subunit 4 (26S proteasome regulatory subun            | O35226    | PSD4_MOUSE  | 3       | 1.12     | 6       | 0.88      | 4        | 1.44   | 2         | 0.91   |           | 19185  |
| 26S proteasome non-ATPase regulatory subunit 5 (26S proteasome subunit S5B) (26            | Q8BJY1    | PSD5_MOUSE  | 3       | 2.58     | 2       | 1.28      | 1        | 3.58   |           |        |           | 66998  |
| 26S proteasome non-ATPase regulatory subunit 6 (26S proteasome regulatory subun            | Q99JI4    | PSD6_MOUSE  | 2       | 1.06     | 6       | 1.03      | 3        | 1.43   | 4         | 1.10   |           | 66413  |
| 26S proteasome non-ATPase regulatory subunit 7 (26S proteasome regulatory subun            | P26516    | PSD7_MOUSE  | 6       | 1.38     | 1       | 1.07      | 2        | 1.18   | 3         | 1.31   |           | 17463  |
| 2700008B19Rik protein (Novel protein)                                                      | Q6P1G0    | Q6P1G0      | 4       | 1.57     | 5       | 1.36      |          |        | 2         | 0.90   |           |        |
| 2810013E07Rik protein                                                                      | Q80V86    | Q80V86      |         |          | 1       | 1.45      |          |        | 1         | 1.02   |           |        |
| 2810028N01Rik protein                                                                      | Q8R2P7    | Q8R2P7      |         |          |         |           |          |        | 2         | 1.26   |           |        |
| 2810429O05Rik protein (Mus musculus 0 day neonate head cDNA, RIKEN full-length             | Q8K015    | Q8K015      |         |          |         |           |          |        | 1         | 1.31   |           |        |
| 2810442I22Rik protein (Fragment)                                                           | Q8K314    | Q8K314      |         |          |         |           |          |        | 2         | 0.76   |           |        |
| 28S ribosomal protein S17, mitochondrial precursor (S17mt) (MRP-S17)                       | Q9CQE3    | RT17_MOUSE  | 1       | 1.10     |         |           |          |        |           |        |           | 66258  |
| 28S ribosomal protein S18a, mitochondrial precursor (MRP-S18-a) (Mrps18a) (MRP- $\zeta$    | Q99N85    | RT18A_MOUSE | 2       | 1.30     | 3       | 1.62      | 1        | 0.93   | 2         | 1.06   |           | 68565  |
| 28S ribosomal protein S18b, mitochondrial precursor (MRP-S18-b) (Mrps18b) (MRP- $\zeta$    | Q99N84    | RT18B_MOUSE | 2       | 1.29     |         |           | 1        | 0.86   |           |        |           | 66973  |
| 2-amino-3-ketobutyrate coenzyme A ligase, mitochondrial precursor (EC 2.3.1.29) (A         | O88986    | KBL_MOUSE   | 2       | 1.07     |         |           | 1        | 0.65   | 1         | 0.25   |           | 26912  |
| 2-aminoadipic 6-semialdehyde dehydrogenase (EC 1.2.1.31)                                   | Q80WC9    | Q80WC9      |         |          |         |           |          |        | 1         | 1.23   |           |        |
| 3'(2'),5'-bisphosphate nucleotidase 1 (EC 3.1.3.7) (Bisphosphate 3'-nucleotidase 1)        | FQ9Z0S1   | BPNT1_MOUSE |         |          | 1       | 0.61      | 1        | 1.17   |           |        |           | 23827  |
| 3110003A17Rik protein (Fragment)                                                           | Q8CHQ7    | Q8CHQ7      | 30      | 2.81     | 26      | 2.45      | 9        | 2.08   | 5         | 2.06   |           |        |
| 3110047P20Rik protein (Fragment)                                                           | Q6P5U7    | Q6P5U7      | 1       | 0.52     |         |           |          |        |           |        |           |        |
| 3110050K21Rik protein (Fragment)                                                           | Q8CIK5    | Q8CIK5      | 1       | 0.61     |         |           |          |        |           |        |           |        |
| 3110052M02Rik protein                                                                      | Q6P2K7    | Q6P2K7      |         |          | 1       | 0.06      |          |        |           |        |           |        |
| 3222401M22Rik protein                                                                      | Q8CHX7    | Q8CHX7      |         |          |         |           |          |        | 1         | 1.02   |           |        |

|                                                                                        |         |             |    |      |    |      |    |      |    |       |       |        |
|----------------------------------------------------------------------------------------|---------|-------------|----|------|----|------|----|------|----|-------|-------|--------|
| 39S ribosomal protein L11, mitochondrial precursor (L11mt) (MRP-L11)                   | Q9CQF0  | RM11_MOUSE  | 2  | 1.16 | 3  | 0.92 |    |      |    |       |       | 66419  |
| 39S ribosomal protein L13, mitochondrial (L13mt) (MRP-L13)                             | Q9D1P0  | RM13_MOUSE  | 2  | 1.74 | 2  | 0.87 |    |      |    |       |       | 68537  |
| 39S ribosomal protein L19, mitochondrial precursor (L19mt) (MRP-L19)                   | Q9D338  | RM19_MOUSE  | 1  | 0.87 | 1  | 0.93 | 2  | 1.29 |    |       |       | 56284  |
| 39S ribosomal protein L32, mitochondrial precursor (L32mt) (MRP-L32) (Heart expres     | Q9DCI9  | RM32_MOUSE  | 3  | 2.24 | 5  | 1.07 | 1  | 0.57 | 6  | 1.01  |       | 75398  |
| 39S ribosomal protein L46, mitochondrial precursor (L46mt) (MRP-L46)                   | Q9EQI8  | RM46_MOUSE  | 4  | 1.01 | 3  | 0.98 | 1  | 1.28 | 2  | 1.10  |       | 67308  |
| 3-hydroxyacyl-CoA dehydrogenase type II (EC 1.1.1.35) (Type II HADH) (Endoplasmic      | O08756  | HCD2_MOUSE  | 6  | 1.28 | 2  | 1.67 | 1  | 1.94 |    |       |       | 15108  |
| 3-hydroxyisobutyrate dehydrogenase, mitochondrial precursor (EC 1.1.1.31) (HIBADH      | Q99L13  | 3HIDH_MOUSE | 3  | 1.62 | 5  | 1.15 | 4  | 1.08 |    | 5     | 0.89  | 58875  |
| 3-mercaptopyruvate sulfurtransferase (EC 2.8.1.2) (MST)                                | Q99J99  | THTM_MOUSE  |    |      |    |      |    |      |    | 2     | 1.91  |        |
| 40 kDa peptidyl-prolyl cis-trans isomerase (EC 5.2.1.8) (PPlase) (Rotamase) (Cyclopl   | Q9RCR16 | PPID_MOUSE  | 8  | 1.89 | 10 | 1.24 | 7  | 2.00 | 8  | 1.28  |       | 67738  |
| 40S ribosomal protein S15a                                                             | P62245  | RS15A_MOUSE | 3  | 1.12 | 6  | 1.12 | 2  | 1.10 | 6  | 1.43  |       | 267019 |
| 40S ribosomal protein S17                                                              | P63276  | RS17_MOUSE  | 6  | 1.27 | 7  | 0.89 | 4  | 0.79 | 2  | 0.43  |       | 20068  |
| 40S ribosomal protein S2 (S4) (LLRep3 protein)                                         | P25444  | RS2_MOUSE   | 6  | 1.31 | 5  | 1.20 | 2  | 1.13 | 3  | 1.11  |       | 16898  |
| 40S ribosomal protein S26                                                              | P62855  | RS26_MOUSE  | 9  | 3.07 | 9  | 2.11 | 6  | 1.09 | 12 | 1.69  |       | 27370  |
| 40S ribosomal protein S28                                                              | P62858  | RS28_MOUSE  | 2  | 1.20 | 5  | 1.33 | 3  | 1.20 | 1  | 0.95  |       | 54127  |
| 40S ribosomal protein S29                                                              | P62274  | RS29_MOUSE  | 5  | 1.97 | 5  | 1.67 | 4  | 0.97 | 5  | 1.13  |       | 20090  |
| 40S ribosomal protein S3                                                               | P62908  | RS3_MOUSE   | 8  | 1.34 | 14 | 1.12 | 6  | 1.25 | 3  | 1.57  |       | 27050  |
| 40S ribosomal protein S4, X isoform                                                    | P62702  | RS4X_MOUSE  | 37 | 1.23 | 47 | 1.37 | 13 | 1.33 | 20 | 1.09  |       | 20102  |
| 40S ribosomal protein S5                                                               | P97461  | RS5_MOUSE   | 29 | 1.30 | 24 | 1.32 | 15 | 1.33 | 18 | 1.21  |       | 20103  |
| 40S ribosomal protein S6 (Phosphoprotein NP33)                                         | P62754  | RS6_MOUSE   | 15 | 1.60 | 17 | 1.23 | 8  | 1.24 | 7  | 1.29  |       | 20104  |
| 4631422O05Rik protein (Fragment)                                                       | Q6P6L0  | Q6P6L0      |    |      | 1  | 0.24 |    |      |    |       |       |        |
| 4921507I02Rik protein (Fragment)                                                       | Q8R234  | Q8R234      |    |      |    |      |    |      |    | 1     | 13.76 |        |
| 4921510J17Rik protein                                                                  | Q80X60  | Q80X60      |    |      |    |      |    |      |    | 1     | 0.23  |        |
| 4930453N24Rik protein                                                                  | Q8VE03  | Q8VE03      |    |      | 1  | 0.57 |    |      |    |       |       |        |
| 4930506M07Rik protein                                                                  | Q8K2Q9  | Q8K2Q9      |    |      |    |      |    |      |    | 1     | 2.64  |        |
| 4931400A14Rik protein                                                                  | Q6P5D8  | Q6P5D8      | 1  | 0.73 | 1  | 1.18 |    |      |    |       |       |        |
| 4933425F03Rik protein                                                                  | Q8K299  | Q8K299      |    |      |    |      |    |      |    | 1     | 0.19  |        |
| 4-aminobutyrate aminotransferase, mitochondrial precursor (EC 2.6.1.19) ((S)-3-amin    | P61922  | GABT_MOUSE  |    |      | 1  | 1.81 | 1  | 0.11 | 2  | 0.93  |       | 268860 |
| 4-trimethylaminobutyraldehyde dehydrogenase (EC 1.2.1.47) (TMABADH) (Aldehyde          | Q9JLJ2  | AL9A1_MOUSE | 6  | 1.42 | 4  | 0.76 |    |      |    |       |       |        |
| 5'-3' exoribonuclease 2 (EC 3.1.11.-) (Dhm1 protein)                                   | Q9DBR1  | XRN2_MOUSE  | 1  | 1.04 | 1  | 0.65 |    |      |    |       |       | 24128  |
| 5330439J01Rik protein                                                                  | Q6PGF4  | Q6PGF4      |    |      | 1  | 1.08 |    |      |    |       |       |        |
| 53BP1 protein                                                                          | Q91YC9  | Q91YC9      |    |      | 1  | 2.36 | 2  | 0.92 | 2  | 1.11  |       |        |
| 5-oxoprolinase (EC 3.5.2.9) (5-oxo-L-prolinase) (Pyroglutamase) (5-OPase)              | Q8K010  | OPLA_MOUSE  | 2  | 3.86 | 1  | 1.00 |    |      | 2  | 1.38  |       | 75475  |
| 6030410K14Rik protein (Fragment)                                                       | Q68FE0  | Q68FE0      |    |      | 1  | 1.06 |    |      |    |       |       |        |
| 60S acidic ribosomal protein P0 (L10E)                                                 | P14869  | RLA0_MOUSE  | 16 | 1.33 | 20 | 1.26 | 9  | 1.27 | 2  | 1.00  |       | 11837  |
| 60S acidic ribosomal protein P1                                                        | P47955  | RLA1_MOUSE  | 2  | 1.16 | 5  | 1.15 |    |      |    |       |       | 56040  |
| 60S ribosomal protein L12                                                              | P35979  | RL12_MOUSE  | 9  | 1.06 | 4  | 0.93 | 3  | 1.25 | 2  | 1.61  |       | 269261 |
| 60S ribosomal protein L13a (Transplantation antigen P198) (Tum-P198 antigen)           | P19253  | RL13A_MOUSE | 10 | 1.53 | 12 | 3.08 | 1  | 1.64 | 1  | 0.01  |       | 22121  |
| 60S ribosomal protein L18a                                                             | P62717  | RL18A_MOUSE | 22 | 1.48 | 22 | 1.39 | 12 | 1.16 | 12 | 1.29  |       | 76808  |
| 60S ribosomal protein L23                                                              | P62830  | RL23_MOUSE  | 18 | 4.09 | 16 | 3.09 | 14 | 1.47 | 19 | 89.77 |       | 65019  |
| 60S ribosomal protein L34                                                              | Q9D1R9  | RL34_MOUSE  | 3  | 2.51 | 5  | 1.30 | 4  | 1.28 | 1  | 1.27  |       | 68436  |
| 60S ribosomal protein L36a (60S ribosomal protein L44)                                 | P83882  | RL36A_MOUSE | 2  | 2.10 | 3  | 2.01 | 2  | 1.21 |    |       |       |        |
| 60S ribosomal protein L4 (L1)                                                          | Q9D8E6  | RL4_MOUSE   | 14 | 1.97 | 16 | 1.64 | 7  | 2.69 | 16 | 3.07  |       | 67891  |
| 60S ribosomal protein L5                                                               | P47962  | RL5_MOUSE   | 35 | 1.33 | 30 | 1.32 | 19 | 1.29 | 18 | 1.17  |       | 19983  |
| 60S ribosomal protein L6 (TAX-responsive enhancer element binding protein 107) (T      | P47911  | RL6_MOUSE   |    |      |    |      |    |      | 2  | 1.38  |       | 19988  |
| 60S ribosomal protein L7                                                               | P14148  | RL7_MOUSE   |    |      | 8  | 1.08 |    |      | 4  | 1.33  |       | 19989  |
| 60S ribosomal protein L8                                                               | P62918  | RL8_MOUSE   | 2  | 0.97 | 4  | 1.33 | 2  | 1.13 | 17 | 3.56  |       | 26961  |
| 60S ribosomal protein L9                                                               | P51410  | RL9_MOUSE   | 7  | 1.19 | 9  | 1.16 | 3  | 1.24 | 4  | 1.29  |       | 20005  |
| 60S ribosome subunit biogenesis protein NIP7 homolog (PEachy) (KD93)                   | Q9CXX8  | NIP7_MOUSE  | 2  | 1.91 |    |      |    |      |    |       |       | 66164  |
| 6430598A04Rik protein                                                                  | Q6PFX7  | Q6PFX7      |    |      | 1  | 0.90 |    |      |    |       |       |        |
| 6720435I21Rik protein (Fragment)                                                       | Q5FWH0  | Q5FWH0      |    |      | 1  | 0.05 |    |      |    |       |       |        |
| 6-phosphofructokinase, type C (EC 2.7.1.11) (Phosphofructokinase 1) (Phosphohexol      | Q9WUA3  | K6PP_MOUSE  | 5  | 2.01 | 4  | 1.35 | 1  | 1.91 | 3  | 1.35  |       | 56421  |
| 6-phosphogluconolactonase (EC 3.1.1.31) (6PGL)                                         | Q9CQ60  | 6PGL_MOUSE  | 4  | 1.87 |    |      | 1  | 2.37 | 2  | 1.89  |       | 66171  |
| 72 kDa type IV collagenase precursor (EC 3.4.24.24) (72 kDa gelatinase) (Matrix met:   | P33434  | MMP2_MOUSE  |    |      | 3  | 1.34 |    |      |    |       |       | 17390  |
| 7-dehydrocholesterol reductase (EC 1.3.1.21) (7-DHC reductase) (Sterol delta-7-redu    | O88455  | DHCR7_MOUSE | 2  | 1.07 | 1  | 2.27 | 3  | 1.01 | 2  | 0.60  |       | 13360  |
| 7S nerve growth factor alpha chain precursor (Alpha-NGF)                               | P00757  | KLK4_MOUSE  |    |      |    |      | 1  | 4.15 |    |       |       | 18048  |
| 8430438L13Rik protein (Fragment)                                                       | Q8K2N6  | Q8K2N6      |    |      | 1  | 1.92 |    |      |    |       |       |        |
| A6 related protein (Twinfilin-like protein) (Mus musculus 12 days embryo spinal gangli | Q9Z0P5  | Q9Z0P5      | 3  | 2.32 | 4  | 1.17 |    |      |    |       |       |        |
| AA517853 protein (CDNA clone MGC:36552)                                                | Q8K2D3  | Q8K2D3      |    |      | 1  | 2.59 |    |      | 3  | 1.62  |       |        |
| AarF domain containing Kinase 4                                                        | Q91WT5  | Q91WT5      | 1  | 1.41 | 1  | 1.29 |    |      | 1  | 1.89  |       |        |
| Acetyl-CoA acetyltransferase, cytosolic (EC 2.3.1.9) (Cytosolic acetoacetyl-CoA thiola | Q8CAY6  | THIC_MOUSE  | 15 | 1.48 | 16 | 1.16 | 4  | 1.79 | 3  | 1.13  |       | 110460 |
| Acetyl-CoA acetyltransferase, mitochondrial precursor (EC 2.3.1.9) (Acetoacetyl-CoA    | Q8QZT1  | THIL_MOUSE  | 5  | 1.19 | 4  | 1.10 | 1  | 0.36 |    |       |       | 110446 |

|                                                                                                   |        |              |    |      |    |      |    |       |    |       |      |        |
|---------------------------------------------------------------------------------------------------|--------|--------------|----|------|----|------|----|-------|----|-------|------|--------|
| Acetyl-Coenzyme A acetyltransferase 3                                                             | Q80X81 | Q80X81       |    |      | 2  | 0.62 |    |       |    |       |      |        |
| Acid ceramidase precursor (EC 3.5.1.23) (Acylsphingosine deacylase) (N-acylsphingoc               | Q9WV54 | ASAH1_MOUSE  | 2  | 1.11 | 2  | 0.70 | 1  | 1.30  |    |       |      | 11886  |
| Acidic 82 kDa protein mRNA                                                                        | Q8R2M2 | Q8R2M2       | 2  | 2.40 | 2  | 2.61 |    |       | 1  | 2.06  |      |        |
| Acidic leucine-rich nuclear phosphoprotein 32 family member A (Potent heat-stable pr              | O35381 | AN32A_MOUSE  | 3  | 1.22 | 2  | 1.24 |    |       |    |       |      | 11737  |
| Acidic leucine-rich nuclear phosphoprotein 32 family member E (LANP-like protein) (L              | P97822 | AN32E_MOUSE  | 8  | 1.53 | 9  | 1.18 | 2  | 0.74  | 3  | 1.53  |      | 66471  |
| Aconitate hydratase, mitochondrial precursor (EC 4.2.1.3) (Citrate hydro-lyase) (Acon             | Q99K10 | ACON_MOUSE   | 12 | 1.60 | 11 | 1.37 | 1  | 1.04  | 6  | 1.23  |      |        |
| Actin-binding LIM protein 1 (Actin-binding LIM protein family member 1) (abLIM-1)                 | Q8K4G5 | ABLML1_MOUSE | 3  | 1.50 | 7  | 3.49 |    |       | 9  | 1.54  |      | 226251 |
| Actin-like protein 3 (Actin-related protein 3)                                                    | Q99JY9 | ARP3_MOUSE   | 21 | 1.81 | 33 | 1.27 | 14 | 1.66  | 16 | 1.29  |      | 74117  |
| Actin-like protein 6A (53 kDa BRG1-associated factor A) (Actin-related protein Baf53a             | Q9Z2N8 | ACL6A_MOUSE  |    |      | 1  | 1.34 |    |       |    |       |      | 56456  |
| Actin-like protein 6B (53 kDa BRG1-associated factor B) (Actin-related protein Baf53b             | Q99MR0 | ACL6B_MOUSE  |    |      | 1  | 3.07 |    |       |    |       |      | 83766  |
| Actin-like protein 7A (Actin-like-7-alpha) (Actin-like 7A) (T-actin 2) (Testis-specific acti      | Q9QY84 | ACL7A_MOUSE  | 1  | 1.34 |    |      |    |       |    |       |      | 11470  |
| Actin-related protein 10                                                                          | Q9QZB7 | ARP10_MOUSE  | 3  | 1.59 | 7  | 0.74 | 1  | 1.46  | 3  | 1.34  |      | 56444  |
| Actin-related protein 8                                                                           | Q8R2S9 | ARP8_MOUSE   |    |      |    |      |    |       | 2  | 1.61  |      | 56249  |
| Activating signal cointegrator 1 (ASC-1) (Thyroid receptor interacting protein 4) (Trip- $\alpha$ | Q9QXN3 | TRIP4_MOUSE  |    |      |    |      |    |       | 2  | 2.98  |      | 56404  |
| Activating signal cointegrator 1 complex subunit 2 (ASC-1 complex subunit p100) (Tri $\beta$      | Q91WR3 | ASCC2_MOUSE  |    |      | 1  | 1.37 |    |       | 1  | 0.04  |      | 75452  |
| Activator 1 38 kDa subunit (Replication factor C 38 kDa subunit) (A1 38 kDa subunit) (            | Q8R323 | RFC3_MOUSE   |    |      | 2  | 1.53 |    |       | 5  | 1.94  |      | 69263  |
| Activator of 90 kDa heat shock protein ATPase homolog 1 (AHA1)                                    | Q8BK64 | AHSA1_MOUSE  | 1  | 1.45 |    |      |    |       | 2  | 1.04  |      | 217737 |
| Acyl coenzyme A thioester hydrolase 2, mitochondrial precursor (EC 3.1.2.-) (48 kDa)              | Q9R0X4 | AC48_MOUSE   | 2  | 2.89 | 2  | 1.11 |    |       | 1  | 1.49  |      | 56360  |
| Acylamino-acid-releasing enzyme (EC 3.4.19.1) (AARE) (Acyl-peptide hydrolase) (AP                 | Q8R146 | APEH_MOUSE   | 1  | 2.18 | 1  | 1.43 | 2  | 2.47  | 1  | 1.13  |      | 235606 |
| Acyl-CoA dehydrogenase family member 8, mitochondrial precursor (EC 1.3.99.-) (AC                 | Q9D7B6 | ACAD8_MOUSE  | 2  | 1.71 | 1  | 0.85 |    |       |    |       |      | 66948  |
| Acyl-CoA dehydrogenase family member 9, mitochondrial precursor (EC 1.3.99.-) (AC                 | Q8JZN5 | ACAD9_MOUSE  | 5  | 1.12 | 4  | 1.12 |    |       |    |       |      | 229211 |
| Acyl-CoA dehydrogenase, long-chain specific, mitochondrial precursor (EC 1.3.99.13) P51174        |        | ACADL_MOUSE  | 6  | 1.05 | 5  | 0.97 | 2  | 0.96  | 2  | 0.90  |      | 11363  |
| Acyl-CoA dehydrogenase, medium-chain specific, mitochondrial precursor (EC 1.3.99                 | P45952 | ACADM_MOUSE  | 1  | 2.49 | 2  | 2.07 | 2  | 16.58 | 2  | 25.27 |      | 11364  |
| Acyl-CoA dehydrogenase, short/branched chain specific, mitochondrial precursor (EC                | Q9DBL1 | ACDSB_MOUSE  | 2  | 0.50 | 2  | 1.40 |    |       |    |       |      | 66885  |
| Acyl-CoA dehydrogenase, very-long-chain specific, mitochondrial precursor (EC 1.3.9               | P50544 | ACADV_MOUSE  |    |      |    |      | 1  | 1.13  |    |       |      | 11370  |
| Acyl-protein thioesterase 1 (EC 3.1.2.-) (Lysophospholipase I) (LysoPLA I) (Lysophos              | P97823 | LYPA1_MOUSE  | 8  | 1.73 | 7  | 1.42 | 2  | 1.29  | 2  | 1.38  |      | 18777  |
| Acyl-protein thioesterase 2 (EC 3.1.2.-) (Lysophospholipase II) (Lysophospholipase 2)             | Q9WTL7 | LYPA2_MOUSE  | 1  | 1.28 | 2  | 0.97 | 1  | 3.66  |    |       |      | 26394  |
| ADAM 10 precursor (EC 3.4.24.81) (A disintegrin and metalloproteinase domain 10) (I               | O35598 | ADA10_MOUSE  | 2  | 1.22 | 3  | 0.63 |    |       |    |       | 6    | 1.17   |
| ADAM 17 precursor (EC 3.4.24.86) (A disintegrin and metalloproteinase domain 17) (                | Q9Z0F8 | ADA17_MOUSE  |    |      |    |      |    |       | 2  | 1.30  |      | 11491  |
| ADAM 9 precursor (EC 3.4.24.-) (A disintegrin and metalloproteinase domain 9) (Met                | Q61072 | ADAM9_MOUSE  |    |      | 3  | 4.98 | 2  | 1.13  | 10 | 1.11  |      | 11502  |
| ADAMTS-1 precursor (EC 3.4.24.-) (A disintegrin and metalloproteinase with thrombo                | P97857 | ATS1_MOUSE   |    |      | 2  | 3.71 |    |       | 2  | 0.47  |      | 11504  |
| ADAMTS-2 precursor (EC 3.4.24.14) (A disintegrin and metalloproteinase with throm                 | Q8C9W3 | ATS2_MOUSE   |    |      |    |      |    |       | 1  | 0.58  |      | 216725 |
| ADAMTS-like protein 1 precursor (Punctin)                                                         | Q8BLI0 | ATL1_MOUSE   |    |      |    |      | 1  | 1.01  |    |       |      | 77739  |
| Adapter-related protein complex 1 beta 1 subunit (Beta-adaptin 1) (Adaptor protein co             | O35643 | AP1B1_MOUSE  | 3  | 1.28 | 4  | 1.09 |    |       | 1  | 0.27  |      | 11764  |
| Adapter-related protein complex 2 alpha 1 subunit (Alpha-adaptin A) (Adaptor protein              | P17426 | AP2A1_MOUSE  | 10 | 1.28 | 12 | 1.07 | 3  | 1.65  | 6  | 0.97  |      | 11771  |
| Adapter-related protein complex 2 beta 1 subunit (Beta-adaptin) (Plasma membrane $\epsilon$       | Q9DBG3 | AP2B1_MOUSE  | 2  | 1.89 | 2  | 0.76 |    |       |    |       |      | 71770  |
| Adapter-related protein complex 3 beta 1 subunit (Beta3A-adaptin) (Adaptor protein $\epsilon$     | Q9Z1T1 | AP3B1_MOUSE  | 3  | 1.52 | 4  | 1.13 |    |       |    |       |      | 11774  |
| Adapter-related protein complex 3 mu 1 subunit (Mu-adaptin 3A) (AP-3 adapter comp                 | Q9JKC8 | AP3M1_MOUSE  | 1  | 2.63 | 2  | 2.44 |    |       |    |       |      | 55946  |
| Adenomatous polyposis coli protein (APC protein) (mAPC)                                           | Q61315 | APC_MOUSE    |    |      |    |      |    |       |    | 1     | 0.53 | 11789  |
| Adenylyl cyclase, type VII (EC 4.6.1.1) (ATP pyrophosphate-lyase 7) (Adenylyl cycl                | P51829 | ADCY7_MOUSE  |    |      | 1  | 0.00 |    |       | 1  | 0.00  |      | 11513  |
| Adenylyl cyclase-associated protein 2 (CAP 2)                                                     | Q9CYT6 | CAP2_MOUSE   | 1  | 1.47 | 2  | 0.85 | 1  | 1.10  |    |       |      | 67252  |
| Adipocyte-derived leucine aminopeptidase precursor (EC 3.4.11.-) (A-LAP) (ARTS-1)                 | Q9EQH2 | ARTS1_MOUSE  | 7  | 1.33 | 5  | 1.18 | 1  | 1.11  | 2  | 1.25  |      | 80898  |
| ADP,ATP carrier protein 2 (ADP/ATP translocase 2) (Adenine nucleotide translocator                | P51881 | ADT2_MOUSE   | 3  | 0.97 | 4  | 1.15 | 2  | 0.84  |    |       |      | 11740  |
| ADP-ribosylation factor 6                                                                         | P62331 | ARF6_MOUSE   | 1  | 1.27 | 2  | 0.91 | 5  | 1.03  | 2  | 1.03  |      |        |
| ADP-ribosylation factor GTPase-activating protein 3 (ARF GAP 3)                                   | Q9D8S3 | ARFG3_MOUSE  | 2  | 2.16 | 1  | 1.00 | 2  | 1.74  | 2  | 1.80  |      | 66251  |
| ADP-ribosylation factor-like protein 3                                                            | Q9WUL7 | ARL3_MOUSE   | 9  | 2.30 | 5  | 1.34 | 3  | 2.01  | 4  | 1.77  |      | 56350  |
| ADP-sugar pyrophosphatase (EC 3.6.1.13) (EC 3.6.1.-) (Nucleoside diphosphate-link                 | Q9JKX6 | NUDT5_MOUSE  | 3  | 1.05 | 3  | 1.79 |    |       |    |       |      | 53893  |
| Adrenodoxin, mitochondrial precursor (Adrenal ferredoxin)                                         | P46656 | ADX_MOUSE    |    |      |    |      | 1  | 1.10  |    |       |      | 14148  |
| Adsl protein (Mus musculus ES cells cDNA, RIKEN full-length enriched library, clone:1             | Q8VCD4 | Q8VCD4       |    |      |    |      |    |       |    |       | 2    | 1.28   |
| Afg3l2 protein                                                                                    | Q8JZQ2 | Q8JZQ2       | 1  | 2.46 |    |      |    |       |    |       |      |        |
| Aflatoxin B1 aldehyde reductase member 2 (EC 1.-.-)                                               | Q8CG76 | ARK72_MOUSE  | 1  | 1.54 | 2  | 1.16 |    |       |    |       |      | 110198 |
| AH receptor-interacting protein (AIP)                                                             | O08915 | AIP_MOUSE    | 3  | 2.07 | 3  | 2.08 |    |       |    |       |      | 11632  |
| Ahcy1 protein (IP3R binding protein released with inositol 1,4,5-trisphosphate) (S-ade            | Q80SW1 | Q80SW1       |    |      | 1  | 0.10 |    |       |    |       | 1    | 2.10   |
| AI448196 protein (Fragment)                                                                       | Q8K2R3 | Q8K2R3       | 1  | 2.13 |    |      |    |       |    |       |      |        |
| AI838661 protein                                                                                  | Q8VEJ1 | Q8VEJ1       |    |      |    |      |    |       |    |       | 2    | 1.09   |
| AI849286 protein (Fragment)                                                                       | Q68G59 | Q68G59       | 5  | 1.26 | 4  | 1.45 | 3  | 0.83  |    |       |      |        |
| Aim1 protein (Fragment)                                                                           | Q811L3 | Q811L3       |    |      | 1  | 0.83 |    |       |    |       |      |        |
| A-kinase anchor protein 4 precursor (Major fibrous sheath protein) (FSC1) (AKAP82)                | Q60662 | AKAP4_MOUSE  | 1  | 1.60 |    |      |    |       |    |       |      | 11643  |
| A-kinase anchor protein 9                                                                         | Q70FJ1 | Q70FJ1       | 1  | 0.92 | 1  | 0.92 | 2  | 1.08  | 1  | 0.64  |      |        |
| AL024069 protein                                                                                  | Q68EE9 | Q68EE9       |    |      |    |      |    |       |    |       | 1    | 1.30   |
| Aladin (Adracalin)                                                                                | P58742 | AAAS_MOUSE   | 2  | 1.32 | 2  | 9.81 |    |       | 2  | 1.77  |      | 223921 |

|                                                                                          |        |             |    |      |    |       |    |      |    |      |        |
|------------------------------------------------------------------------------------------|--------|-------------|----|------|----|-------|----|------|----|------|--------|
| Alanyl-tRNA synthetase (EC 6.1.1.7) (Alanine--tRNA ligase) (AlaRS)                       | Q8BGQ7 | SYA_MOUSE   | 5  | 3.18 | 13 | 1.41  | 9  | 1.51 | 6  | 1.66 | 234734 |
| Alcohol dehydrogenase Pan1b (Dehydrogenase/reductase (SDR family) member 8) (IQ9EQ06     | Q9EQ06 | Q9EQ06      | 13 | 2.29 | 11 | 1.43  | 4  | 0.97 | 5  | 1.02 |        |
| Aldehyde dehydrogenase 1 family, member L2                                               | Q8K009 | Q8K009      | 6  | 1.85 | 9  | 2.22  | 2  | 1.08 | 2  | 0.86 |        |
| Aldehyde dehydrogenase family 3, subfamily A2                                            | Q5SRE0 | Q5SRE0      | 1  | 3.43 | 1  | 1.28  | 1  | 1.19 |    |      |        |
| Aldehyde dehydrogenase family 7 member A1 (EC 1.2.1.3) (Antiquitin 1)                    | Q9DBF1 | AL7A1_MOUSE | 6  | 1.29 | 4  | 0.88  | 1  | 1.93 | 1  | 1.61 | 110695 |
| Aldehyde dehydrogenase, dimeric NADP-preferring (EC 1.2.1.5) (ALDH class 3) (Dio)        | P47739 | AL3A1_MOUSE |    |      |    |       | 2  | 2.06 |    |      | 11670  |
| Aldehyde dehydrogenase, mitochondrial precursor (EC 1.2.1.3) (ALDH class 2) (AHD         | P47738 | ALDH2_MOUSE | 5  | 1.32 | 4  | 0.91  | 5  | 1.00 | 2  | 0.85 | 11669  |
| Aldehyde oxidase structural homolog 2                                                    | Q9ES55 | Q9ES55      |    |      |    | 3.60  |    |      |    |      |        |
| Aldo-keto reductase family 1 member E1 (EC 1.1.1.-)                                      | Q9DCT1 | AK1E1_MOUSE |    |      |    | 1.50  |    |      |    |      | 56043  |
| Aldose reductase (EC 1.1.1.21) (AR) (Aldehyde reductase)                                 | P45376 | ALDR_MOUSE  | 3  | 3.00 | 5  | 2.10  | 2  | 1.82 | 4  | 2.26 | 11677  |
| Aldose reductase-related protein 2 (EC 1.1.1.21) (AR) (Aldehyde reductase) (Fibrobla     | P45377 | ALD2_MOUSE  | 1  | 2.36 |    |       | 1  | 2.44 | 2  | 1.84 | 14187  |
| Alg1 protein                                                                             | Q921Q3 | Q921Q3      |    |      | 2  | 1.41  |    |      |    |      |        |
| Almstrom syndrome 1 protein                                                              | Q8K4E0 | Q8K4E0      | 1  | 5.83 |    |       |    |      |    |      |        |
| Alpha 1,3-fucosyltransferase (Fragment)                                                  | Q920V9 | Q920V9      | 1  | 0.33 |    |       |    |      |    |      |        |
| Alpha adducin (Erythrocyte adducin alpha subunit)                                        | Q9QYC0 | ADDA_MOUSE  | 1  | 1.62 |    |       |    |      | 2  | 0.84 | 11518  |
| Alpha-1 catenin (102 kDa cadherin-associated protein) (CAP102) (Alpha E-catenin)         | P26231 | CTN1_MOUSE  | 27 | 1.41 | 25 | 1.61  | 10 | 1.23 | 11 | 1.03 | 12385  |
| Alpha-1,3-mannosyltransferase ALG2 (EC 2.4.1.-) (GDP-Man:Man(1)GlcNAc(2)-PP-d            | Q9DBE8 | ALG2_MOUSE  | 3  | 1.40 | 5  | 1.72  | 2  | 0.57 | 4  | 0.79 | 56737  |
| Alpha-1-syntrophin (59 kDa dystrophin-associated protein A1, acidic component 1) (S      | Q61234 | SNTA1_MOUSE | 1  | 0.60 |    |       |    |      |    |      | 20648  |
| Alpha-2-macroglobulin                                                                    | Q6GQT1 | Q6GQT1      | 4  | 7.35 | 1  | 15.70 |    |      | 1  | 0.65 |        |
| Alpha-actinin 1 (Alpha-actinin cytoskeletal isoform) (Non-muscle alpha-actinin 1) (F-act | Q7TPR4 | ACTN1_MOUSE | 31 | 1.41 | 26 | 1.37  | 18 | 1.36 | 12 | 1.02 |        |
| Alpha-actinin 4 (Non-muscle alpha-actinin 4) (F-actin cross linking protein)             | P57780 | ACTN4_MOUSE | 8  | 1.35 | 10 | 1.43  | 7  | 1.92 | 6  | 1.44 | 60595  |
| Alpha-aminoadipic semialdehyde synthase, mitochondrial precursor (LKR/SDH) [Inclu        | Q99K67 | AASS_MOUSE  |    |      |    |       |    |      | 1  | 5.73 | 30956  |
| Alpha-fetoprotein enhancer binding protein (AT motif-binding factor) (AT-binding trans   | Q61329 | ATBF1_MOUSE | 1  | 3.80 |    |       |    |      |    |      | 11906  |
| Alpha-mannosidase 2C1 (EC 3.2.1.24) (Alpha-D-mannoside mannohydrolase) (Mann             | Q91W89 | MA2C1_MOUSE | 2  | 1.35 | 1  | 0.93  |    |      |    |      | 73744  |
| Alpha-mannosidase II (EC 3.2.1.114) (Mannosyl-oligosaccharide 1,3-1,6-alpha-mann         | P27046 | MA2A1_MOUSE | 7  | 1.26 | 5  | 1.37  | 1  | 0.83 | 1  | 1.81 | 17158  |
| Alpha-N-acetylgalactosaminide alpha-2,6-sialyltransferase 1 (EC 2.4.99.3) (GalNAc a      | Q9QZ39 | SIA7A_MOUSE |    |      |    | 4.60  |    |      |    |      | 20445  |
| Alpha-soluble NSF attachment protein (SNAP-alpha) (N-ethylmaleimide-sensitive fact       | Q9DB05 | SNAA_MOUSE  | 3  | 2.12 | 4  | 1.95  | 3  | 1.33 | 2  | 1.11 | 108124 |
| Aminopeptidase N (EC 3.4.11.2) (mAPN) (Alanyl aminopeptidase) (Microsomal amin           | P97449 | AMPN_MOUSE  |    |      |    |       | 1  | 0.98 |    |      | 16790  |
| AMP-activated protein kinase, alpha 1 catalytic subunit (EC 2.7.1.-)                     | Q5EG47 | Q5EG47      | 7  | 2.09 | 5  | 1.19  | 1  | 1.63 | 3  | 1.00 |        |
| Amyloid beta (A4) protein-binding, family B, member 1 interacting protein                | Q8R5A3 | Q8R5A3      | 1  | 1.80 |    |       |    |      |    |      |        |
| Amyloid beta A4 precursor protein-binding family B member 2                              | Q9DBR4 | APBB2_MOUSE | 1  | 2.75 | 2  | 1.25  |    |      |    |      | 11787  |
| Amyloid beta A4 protein precursor (APP) (ABPP) (Alzheimer's disease amyloid protei       | P12023 | A4_MOUSE    | 6  | 1.18 | 10 | 1.23  | 4  | 0.83 | 14 | 0.81 | 11820  |
| Amyloid protein-binding protein 1 (Amyloid beta precursor protein-binding protein 1, 5'  | Q8VBW6 | APBP1_MOUSE | 3  | 1.20 | 2  | 1.42  | 2  | 1.10 |    |      | 234664 |
| AN2/NG2 proteoglycan                                                                     | Q8VHY0 | Q8VHY0      | 2  | 1.32 | 1  | 0.88  |    |      |    |      |        |
| Anamorsin (Cytokine induced apoptosis inhibitor 1)                                       | Q8WTY4 | CPIN1_MOUSE | 3  | 1.60 | 2  | 0.93  | 1  | 3.91 | 6  | 2.07 |        |
| Anaphase promoting complex subunit 1 (APC1) (Cyclosome subunit 1) (Protein Tsg2-         | P53995 | ANC1_MOUSE  | 3  | 1.55 | 3  | 0.98  |    |      | 3  | 1.06 | 17222  |
| Anaphase promoting complex subunit 11 (APC11) (Cyclosome subunit 11)                     | Q9CPX9 | APC11_MOUSE |    |      |    |       |    |      | 1  | 3.25 | 66156  |
| Anaphase promoting complex subunit 4 (APC4) (Cyclosome subunit 4)                        | Q91W96 | ANC4_MOUSE  | 8  | 1.30 | 8  | 1.29  | 3  | 0.99 | 4  | 2.42 | 52206  |
| Anaphase promoting complex subunit 5 (APC5) (Cyclosome subunit 5)                        | Q8BTZ4 | ANC5_MOUSE  | 6  | 1.64 | 3  | 1.26  |    |      | 2  | 2.27 | 59008  |
| Anaphase promoting complex subunit 7 (APC7) (Cyclosome subunit 7) (Prediabetic N         | Q9VWM3 | APC7_MOUSE  |    |      |    |       |    |      | 1  | 2.79 | 56317  |
| Androgen-induced prostate proliferative shutoff associated protein AS3                   | Q7TSS4 | Q7TSS4      | 4  | 8.38 | 8  | 1.21  | 2  | 0.80 | 2  | 1.09 |        |
| Angio-associated migratory protein                                                       | Q8K2C1 | Q8K2C1      | 2  | 2.63 | 3  | 1.57  | 3  | 1.73 | 1  | 1.74 |        |
| Ankyrin 3 (Ankyrin G) (Epithelial ankyrin) (Ankyrin-3)                                   | Q61307 | Q61307      |    |      |    | 2.89  |    |      |    |      |        |
| Ankyrin repeat and FYVE domain protein 1 (Ankyrin repeats hooked to a zinc finger r      | Q810B6 | ANFY1_MOUSE | 10 | 1.56 | 10 | 0.99  | 4  | 1.51 | 5  | 1.52 | 11736  |
| Ankyrin repeat and IBR domain containing protein 1 (Fragment)                            | Q6ZPS6 | AKIB1_MOUSE |    |      |    |       | 1  | 5.23 | 2  | 1.25 | 70797  |
| Ankyrin repeat and MYND domain containing 2                                              | Q921J1 | Q921J1      |    |      |    | 0.28  |    |      |    |      |        |
| Ankyrin repeat and SOCS box protein 6 (ASB-6)                                            | Q91ZU1 | ASB6_MOUSE  |    |      |    |       |    |      | 1  | 7.60 | 72323  |
| Ankyrin repeat domain 15                                                                 | Q6AXG6 | Q6AXG6      | 1  | 2.30 | 1  | 1.79  | 1  | 1.50 |    |      |        |
| Anln protein                                                                             | Q8K298 | Q8K298      |    |      |    |       |    |      | 2  | 1.38 |        |
| Annexin A1 (Annexin I) (Lipocortin I) (Calpactin II) (Chromobindin 9) (P35) (Phospholi   | P10107 | ANXA1_MOUSE | 26 | 2.02 | 28 | 1.97  | 6  | 1.70 | 13 | 1.74 | 16952  |
| Annexin A11 (Annexin XI) (Calcyclin-associated annexin 50) (CAP-50)                      | P97384 | ANX11_MOUSE | 1  | 1.65 | 1  | 2.15  | 2  | 0.89 | 2  | 1.95 | 11744  |
| Annexin A7 (Annexin VII) (Synnexin)                                                      | Q07076 | ANXA7_MOUSE | 7  | 1.12 | 4  | 1.31  | 1  | 1.26 | 2  | 1.11 | 11750  |
| Annexin A8 (Annexin VIII)                                                                | Q35640 | ANXA8_MOUSE |    |      |    |       |    |      | 1  | 0.05 | 11752  |
| Anthrax toxin receptor 1 precursor (Tumor endothelial marker 8)                          | Q9CZ52 | ANTR1_MOUSE | 4  | 1.09 | 2  | 1.22  |    |      |    |      | 69538  |
| Antigen peptide transporter 1 (APT1) (Peptide transporter TAP1) (ATP-binding casset      | P21958 | TAP1_MOUSE  | 1  | 1.91 |    |       | 1  | 0.28 |    |      | 21354  |
| Antileukoproteinase 1 precursor (ALP) (Secretory leukocyte protease inhibitor)           | P97430 | ALK1_MOUSE  |    |      |    |       |    |      | 1  | 0.00 | 20568  |
| ApoA-I binding protein (Apolipoprotein A-I binding protein)                              | Q8K4Z3 | Q8K4Z3      | 18 | 1.42 | 12 | 1.45  | 7  | 1.18 | 15 | 1.23 |        |
| Apoptosis inhibitor 5 (API-5) (AAC-11)                                                   | Q35841 | API5_MOUSE  |    |      |    |       |    |      | 2  | 0.81 |        |
| Apoptosis regulator BAX, membrane isoform alpha                                          | Q07813 | BAXA_MOUSE  | 1  | 1.84 |    |       |    |      |    |      | 12028  |
| Apoptotic chromatin condensation inducer in the nucleus (Acinus)                         | Q9JIX8 | ACINU_MOUSE |    |      |    | 1.72  |    |      |    |      | 56215  |
| Apoptotic protease activating factor 1 (Apaf-1)                                          | Q88879 | APAF_MOUSE  |    |      | 2  | 2.12  | 1  | 1.51 | 2  | 1.25 | 11783  |



|                                                                                         |          |             |    |       |    |       |      |       |                |
|-----------------------------------------------------------------------------------------|----------|-------------|----|-------|----|-------|------|-------|----------------|
| BC051244 protein                                                                        | Q80W22   | Q80W22      | 1  | 1.51  |    |       | 1    | 1.39  |                |
| BC057593 protein                                                                        | Q6PFE9   | Q6PFE9      | 1  | 4.16  |    |       |      |       |                |
| Bcl2-associated athanogene 2 (Mus musculus 9 days embryo whole body cDNA, RIK Q91YN9)   | Q91YN9   | Q91YN9      | 2  | 2.83  |    | 1     | 2.41 |       |                |
| Bcl-2-like 13 protein (Mil1 protein) (Bcl-rambo)                                        | P59017   | B2L13_MOUSE |    |       |    |       |      | 1     | 1.05 94044     |
| Bcr protein (Fragment)                                                                  | Q6PAJ1   | Q6PAJ1      | 1  | 1.23  |    |       |      |       |                |
| Beta defensin 39 precursor                                                              | Q70KL3   | Q70KL3      |    |       |    | 1     | 4.66 | 1     | 12.89          |
| Beta enolase (EC 4.2.1.11) (2-phospho-D-glycerate hydro-lyase) (Muscle-specific eno     | P21550   | ENOB_MOUSE  | 1  | 10.08 |    |       |      | 1     | 1.39 13808     |
| Beta-1,3-N-acetylglucosaminyltransferase radical fringe (EC 2.4.1.222) (O-fucosylpep    | O09009   | RFNG_MOUSE  | 1  | 0.93  |    |       |      |       | 19719          |
| Beta-2-syntrophin (59 kDa dystrophin-associated protein A1, basic component 2) (Syr     | Q61235   | SNTB2_MOUSE | 6  | 2.64  | 6  | 1.32  | 2    | 1.67  | 1 9.76 20650   |
| Beta-catenin                                                                            | Q02248   | CTNB1_MOUSE | 5  | 1.31  | 6  | 1.12  | 2    | 0.83  | 1 0.85 12387   |
| Beta-catenin-like protein 1 (Nuclear associated protein) (NAP)                          | Q9CWL8   | CTBL1_MOUSE |    |       | 1  | 0.64  |      |       | 66642          |
| Beta-centractin (Actin-related protein 1B) (ARP1B)                                      | Q8R5C5   | ACTY_MOUSE  | 1  | 1.15  |    |       |      |       | 226977         |
| Beta-hexosaminidase alpha chain precursor (EC 3.2.1.52) (N-acetyl-beta-glucosamini      | P29416   | HEXA_MOUSE  | 2  | 0.51  |    |       |      |       | 15211          |
| BHLH factor Math6 (Atoh8 protein) (BHLH transcription factor)                           | Q99NA2   | Q99NA2      |    |       |    |       |      | 1     | 1.55           |
| Bifunctional 3'-phosphoadenosine 5'-phosphosulfate synthetase 1 (PAPS synthetase        | Q60967   | PAPS1_MOUSE | 3  | 0.94  | 1  | 1.59  | 2    | 2.12  | 3 3.25 23971   |
| Bifunctional aminoacyl-tRNA synthetase [Includes: Glutamyl-tRNA synthetase (EC 6.1      | Q9CGC7   | SYEP_MOUSE  | 35 | 1.67  | 44 | 1.13  | 27   | 1.34  | 28 1.45 107508 |
| Bifunctional methylenetetrahydrofolate dehydrogenase/cyclohydrolase, mitochondrial      | P18155   | MTDC_MOUSE  | 3  | 0.75  | 2  | 1.55  |      |       | 17768          |
| Bifunctional polynucleotide phosphatase/kinase (Polynucleotide kinase-3'-phosphatas     | Q9JLV6   | PNKP_MOUSE  | 1  | 2.90  |    |       | 2    | 0.46  | 3 1.90 59047   |
| Bifunctional purine biosynthesis protein PURH [Includes: Phosphoribosylaminoimidaz      | Q9CWJ9   | PUR9_MOUSE  | 18 | 1.71  | 16 | 1.21  | 11   | 2.51  | 9 1.48 108147  |
| Bifunctional UDP-N-acetylglucosamine 2-epimerase/N-acetylmannosamine kinase (U          | Q91WG8   | GLCNE_MOUSE | 3  | 5.34  | 4  | 1.91  | 4    | 1.65  | 6 1.06 50798   |
| Biglycan precursor (Bone/cartilage proteoglycan I) (PG-S1)                              | P28653   | PGS1_MOUSE  | 12 | 1.53  | 5  | 1.43  | 3    | 1.82  | 3 1.00 12111   |
| Biliverdin reductase A precursor (EC 1.3.1.24) (Biliverdin-IX alpha-reductase) (BVR     | A Q9CY64 | BIEA_MOUSE  | 1  | 1.53  |    |       |      |       | 109778         |
| Biotinidase precursor (EC 3.5.1.12)                                                     | Q8CIF4   | BTD_MOUSE   | 2  | 1.60  |    |       | 2    | 1.26  | 26363          |
| BMP-2 inducible protein kinase (EC 2.7.1.37) (BIKe)                                     | Q91Z96   | BMP2K_MOUSE | 2  | 2.12  | 1  | 1.36  | 1    | 2.06  | 1 1.98 140780  |
| Bone morphogenetic protein receptor type IA precursor (EC 2.7.1.37) (Serine/threonin    | P36895   | BMR1A_MOUSE | 1  | 3.33  | 1  | 3.33  |      |       | 2 0.73 12166   |
| Brain protein 44                                                                        | Q9D023   | BR44_MOUSE  | 3  | 1.68  | 1  | 1.54  | 2    | 0.94  | 2 0.94 70456   |
| Brain stress early protein                                                              | Q8R4D3   | Q8R4D3      |    |       |    |       |      | 1     | 0.48           |
| Brain-specific angiogenesis inhibitor 1                                                 | Q8CGM0   | Q8CGM0      |    |       | 1  | 0.02  |      |       |                |
| Branched chain ketoacid dehydrogenase E1, beta polypeptide                              | Q6P3A8   | Q6P3A8      | 3  | 1.59  | 1  | 2.47  |      |       |                |
| Branched-chain-amino-acid aminotransferase, mitochondrial precursor (EC 2.6.1.42)       | O35855   | BCAT2_MOUSE | 7  | 2.45  | 4  | 1.48  | 3    | 0.92  | 6 0.85 12036   |
| BRCA1-associated protein (EC 6.3.2.-) (BRAP2) (Impedes mitogenic signal propagati       | Q99MP8   | BRAP_MOUSE  | 2  | 2.92  | 1  | 3.75  | 1    | 0.65  | 72399          |
| Brix domain containing protein 1                                                        | Q9JJ80   | BXDC1_MOUSE | 1  | 3.56  | 1  | 3.90  |      |       | 67239          |
| Bromodomain adjacent to zinc finger domain protein 1B (Williams-Beuren syndrome c       | Q9Z277   | BAZ1B_MOUSE | 1  | 0.93  | 1  | 0.93  |      |       | 22385          |
| Bromodomain-containing female sterile homeotic-like protein                             | Q91Y44   | Q91Y44      |    |       | 1  | 1.49  |      |       |                |
| Bullous pemphigoid antigen 1, isoforms 1/2/3/4 (BPA) (Hemidesmosomal plaque prot        | Q91ZU6   | BPA1_MOUSE  | 1  | 0.91  | 3  | 1.36  |      |       | 13518          |
| Butyrate response factor 1 (TIS11B protein)                                             | P23950   | TISB_MOUSE  | 2  | 2.13  | 7  | 18.40 | 1    | 11.85 | 1 7.60 12192   |
| Butyrate response factor 2 (TIS11D protein)                                             | P23949   | TISD_MOUSE  | 2  | 1.77  | 3  | 6.51  | 2    | 1.67  | 2 2.65 12193   |
| BWF1                                                                                    | Q6VNB8   | Q6VNB8      | 1  | 0.85  | 2  | 1.78  |      |       | 1 1.39         |
| Bystin                                                                                  | O54825   | BYST_MOUSE  |    |       |    |       |      | 1     | 0.64 53414     |
| C230075L19Rik protein                                                                   | Q80ZJ6   | Q80ZJ6      | 1  | 1.30  |    |       |      | 1     | 1.47           |
| C-4 methylsterol oxidase (EC 1.14.13.72) (Methylsterol monooxygenase)                   | Q9CRA4   | ERG25_MOUSE |    |       | 2  | 3.07  |      |       | 66234          |
| C6.1A protein                                                                           | P46737   | C61A_MOUSE  | 2  | 0.86  | 2  | 1.35  | 2    | 1.02  | 1 2.03 210766  |
| C77604 protein                                                                          | Q6PGH1   | Q6PGH1      |    |       | 2  | 3.80  | 1    | 1.56  | 4 1.88         |
| C77668 protein                                                                          | Q99LK7   | Q99LK7      | 1  | 1.29  |    |       |      |       |                |
| CAAX prenyl protease 2 (EC 3.4.22.-) (Prenyl protein-specific endoprotease 2) (Farne    | P57791   | FAC2_MOUSE  |    |       |    |       |      | 1     | 1.43 19671     |
| Cad protein (Fragment)                                                                  | Q6P9L1   | Q6P9L1      | 4  | 1.80  | 5  | 1.07  |      |       | 2 1.25         |
| Cad protein (Fragment)                                                                  | Q7TN13   | Q7TN13      | 3  | 2.69  | 5  | 2.93  | 5    | 1.56  | 9 1.22         |
| Cadherin EGF LAG seven-pass G-type receptor 2 precursor (Flamingo 1) (mFmi1)            | Q9R0M0   | CELR2_MOUSE | 1  | 0.02  |    |       |      |       | 53883          |
| Cadherin-11 precursor (Osteoblast-cadherin) (OB-cadherin) (OSF-4)                       | P55288   | CAD11_MOUSE | 2  | 1.78  | 2  | 1.11  |      |       | 12552          |
| Calcium/calmodulin-dependent protein kinase type 1D (EC 2.7.1.123) (CaM kinase ID       | Q8BW96   | KCC1D_MOUSE |    |       |    |       |      | 1     | 98.25 227541   |
| Calcium-binding mitochondrial carrier protein Aralar1 (Mitochondrial aspartate glutam   | Q8BH59   | CMC1_MOUSE  | 4  | 1.47  | 10 | 1.33  | 2    | 1.31  | 2 1.00 78830   |
| Calcium-binding mitochondrial carrier protein Aralar2 (Mitochondrial aspartate glutam   | Q9QXX4   | CMC2_MOUSE  | 2  | 1.54  | 5  | 1.65  | 2    | 0.72  | 2 1.06 50799   |
| Calcium-transporting ATPase type 2C, member 1 (EC 3.6.3.8) (ATPase 2C1) (ATP-d          | Q80XR2   | AT2C1_MOUSE |    |       | 2  | 1.73  |      |       | 2 0.74 235574  |
| Calcylin-binding protein (CacyBP) (Siah-interacting protein)                            | Q9CXW3   | CYBP_MOUSE  | 3  | 1.56  | 5  | 1.84  |      |       | 12301          |
| Caldesmon 1                                                                             | Q8VCQ8   | Q8VCQ8      | 4  | 1.74  | 4  | 1.30  | 2    | 1.91  | 1 1.17         |
| Calgizzarin (S100 calcium-binding protein A11) (Endothelial monocyte-activating poly    | P50543   | S10AB_MOUSE | 75 | 2.56  | 95 | 2.55  | 59   | 1.54  | 23 1.47 20195  |
| Calmodulin binding transcription activator 2                                            | Q80Y50   | Q80Y50      | 1  | 1.14  |    |       |      |       | 59.69          |
| Calnexin precursor                                                                      | P35564   | CALX_MOUSE  | 6  | 1.70  | 13 | 1.58  | 5    | 1.49  | 11 1.05 12330  |
| Calpain 1, large [catalytic] subunit (EC 3.4.22.52) (Calcium-activated neutral proteina | O35350   | CAN1_MOUSE  | 8  | 1.25  | 8  | 0.99  | 3    | 1.15  | 5 1.22 12333   |
| Calpain 2, large [catalytic] subunit precursor (EC 3.4.22.53) (Calcium-activated neutra | O08529   | CAN2_MOUSE  | 18 | 1.73  | 21 | 1.24  | 8    | 1.89  | 8 1.20 12334   |
| Calpain 6                                                                               | O35646   | CAN6_MOUSE  | 3  | 1.98  |    |       |      |       | 12338          |

|                                                                                          |        |             |    |       |    |        |    |       |    |      |        |
|------------------------------------------------------------------------------------------|--------|-------------|----|-------|----|--------|----|-------|----|------|--------|
| Calpain small subunit 1 (CSS1) (Calcium-dependent protease small subunit 1) (Calp        | O88456 | CPNS1_MOUSE | 2  | 1.49  | 2  | 2.30   | 1  | 1.60  |    |      | 12336  |
| Calponin-2 (Calponin H2, smooth muscle) (Neutral calponin)                               | Q08093 | CLP2_MOUSE  | 33 | 1.25  | 23 | 1.18   | 19 | 1.37  | 4  | 1.41 | 12798  |
| Calponin-3 (Calponin, acidic isoform)                                                    | Q9DAW9 | CLP3_MOUSE  | 9  | 1.11  | 5  | 1.25   | 4  | 1.42  | 2  | 0.93 | 71994  |
| Calreticulin precursor (CRP55) (Calregulin) (HACBP) (ERp60)                              | P14211 | CRTC_MOUSE  | 26 | 1.28  | 27 | 75.42  | 13 | 1.25  | 21 | 0.83 | 12317  |
| cAMP-dependent 3',5'-cyclic phosphodiesterase 4A (EC 3.1.4.17)                           | O89084 | PDE4A_MOUSE |    |       | 1  | 5.44   |    |       |    |      | 18577  |
| cAMP-dependent protein kinase type I-alpha regulatory subunit                            | Q9DBC7 | KAP0_MOUSE  | 2  | 1.35  | 1  | 0.60   |    |       |    |      | 19084  |
| Capg protein                                                                             | Q99LB4 | Q99LB4      | 1  | 21.20 |    |        |    |       |    |      |        |
| Carbohydrate sulfotransferase 12 (EC 2.8.2.5) (Chondroitin 4-O-sulfotransferase 2) (C    | Q99LL3 | CHSTC_MOUSE | 4  | 1.90  | 4  | 1.18   | 3  | 1.17  | 2  | 0.76 |        |
| Carbohydrate sulfotransferase D4ST1 (EC 2.8.2.-) (Dermatan 4-sulfotransferase 1) (C      | Q80V53 | CHSTE_MOUSE |    |       |    |        | 1  | 1.19  | 1  | 0.83 |        |
| Carbonic anhydrase XIII (EC 4.2.1.1) (Carbonate dehydratase XIII) (CA-XIII)              | Q9D6N1 | CAH13_MOUSE | 1  | 1.41  |    |        |    |       |    |      | 71934  |
| Carbonyl reductase 3 (Mus musculus adult male tongue cDNA, RIKEN full-length enri        | Q8K354 | Q8K354      | 3  | 2.58  | 1  | 1.33   |    |       |    |      |        |
| Carboxypeptidase D precursor (EC 3.4.17.22) (Metalloprotease D) (gp180)                  | O89001 | CBPD_MOUSE  | 6  | 1.85  | 4  | 1.45   |    |       |    |      | 12874  |
| Cardiac Ca2+ release channel                                                             | Q9ERN6 | Q9ERN6      | 1  | 92.18 | 1  | 189.85 |    |       | 1  | 7.19 |        |
| Carnitine deficiency-associated protein expressed in ventricle 1 (CDV-1 protein)         | Q35594 | CDV1_MOUSE  | 2  |       | 2  | 1.17   |    |       |    |      | 12589  |
| Carnitine O-acetyltransferase (EC 2.3.1.7) (Carnitine acetylase) (CAT) (Carnitine acet   | P47934 | CACP_MOUSE  | 2  | 1.25  |    |        |    |       |    |      | 12908  |
| Carnitine O-palmitoyltransferase I, mitochondrial brain isoform (EC 2.3.1.21) (Carnitin  | Q8BGD5 | CPT1C_MOUSE | 1  | 1.17  |    |        |    |       |    |      |        |
| Carnitine O-palmitoyltransferase I, mitochondrial liver isoform (EC 2.3.1.21) (CPT I) (C | P97742 | CPT1A_MOUSE | 3  | 1.25  | 3  | 1.24   | 1  | 0.93  | 2  | 0.81 | 12894  |
| Carnitine O-palmitoyltransferase II, mitochondrial precursor (EC 2.3.1.21) (CPT II)      | P52825 | CPT2_MOUSE  | 1  | 1.13  | 1  | 1.09   | 1  | 0.45  | 1  | 0.85 | 12896  |
| Cartilage-associated protein precursor                                                   | Q9CYD3 | CASP_MOUSE  | 9  | 1.10  | 6  | 1.19   | 4  | 0.58  | 4  | 0.43 | 56693  |
| Casein kinase I, alpha isoform (EC 2.7.1.-) (CKI-alpha) (CK1)                            | Q8BK63 | KC1A_MOUSE  |    |       | 1  | 0.84   |    |       |    |      | 93687  |
| Casein kinase I, delta isoform (EC 2.7.1.-) (CKI-delta) (CKId)                           | Q9DC28 | KC1D_MOUSE  |    |       | 1  | 2.62   | 1  | 1.15  |    |      | 104318 |
| Casein kinase II beta subunit (CK II beta) (Phosvitin)                                   | P67871 | CSK2B_MOUSE | 3  | 1.51  | 4  | 1.02   | 1  | 2.95  | 2  | 0.85 | 13001  |
| Caspase-3 precursor (EC 3.4.22.-) (CASP-3) (Apopain) (Cysteine protease CPP32) (         | P70677 | CASP3_MOUSE | 7  | 1.48  | 1  | 1.44   | 2  | 1.98  |    |      | 12367  |
| Caspase-4 precursor (EC 3.4.22.-) (CASP-4) (Caspase-11) (ICH-3 protease)                 | P70343 | CASP4_MOUSE |    |       | 1  | 13.11  | 1  | 14.22 |    |      | 12363  |
| Caspase-6 precursor (EC 3.4.22.-) (CASP-6) (Apoptotic protease Mch-2)                    | O08738 | CASP6_MOUSE | 1  | 1.37  | 1  | 1.01   | 1  | 0.44  |    |      | 12368  |
| Caspase-7 precursor (EC 3.4.22.-) (CASP-7) (LICE2 cysteine protease) (Apoptotic pr       | P97864 | CASP7_MOUSE | 5  | 2.39  | 7  | 1.58   | 2  | 1.37  | 2  | 1.54 | 12369  |
| Caspase-8 precursor (EC 3.4.22.-) (CASP-8)                                               | O89110 | CASP8_MOUSE | 3  | 2.53  | 2  | 0.98   | 3  | 2.21  | 1  | 0.10 | 12370  |
| Catechol O-methyltransferase (EC 2.1.1.6)                                                | O88587 | COMT_MOUSE  | 1  | 1.48  | 2  | 1.27   |    |       |    |      | 12846  |
| Cathepsin B precursor (EC 3.4.22.1) (Cathepsin B1)                                       | P10605 | CATB_MOUSE  | 22 | 1.55  | 32 | 1.69   | 12 | 1.26  | 15 | 1.04 | 13030  |
| Cathepsin H precursor (EC 3.4.22.16) (Cathepsin B3) (Cathepsin BA)                       | P49935 | CATH_MOUSE  |    |       | 1  | 1.82   |    |       | 1  | 1.11 | 13036  |
| Cathepsin L precursor (EC 3.4.22.15) (Major excreted protein) (MEP) (p39 cysteine pr     | P06797 | CATL_MOUSE  |    |       |    |        |    |       | 1  | 2.94 | 13039  |
| Cation-dependent mannose-6-phosphate receptor precursor (CD Man-6-P receptor) (          | P24668 | MPRD_MOUSE  | 6  | 1.34  | 7  | 1.14   | 2  | 2.54  | 2  | 1.53 | 17113  |
| Cation-independent mannose-6-phosphate receptor precursor (CI Man-6-P receptor) (C       | Q07113 | MPRI_MOUSE  | 28 | 1.54  | 39 | 1.40   | 12 | 0.98  | 26 | 1.51 | 16004  |
| Caveolin-1                                                                               | P49817 | CAV1_MOUSE  |    |       | 2  | 3.77   | 2  | 0.67  | 3  | 0.56 | 12389  |
| Caveolin-2                                                                               | Q9VWC3 | CAV2_MOUSE  | 2  | 1.41  | 5  | 2.16   |    |       | 3  | 0.74 | 12390  |
| CBL E3 ubiquitin protein ligase (EC 6.3.2.-) (Signal transduction protein CBL) (Proto-c  | P22682 | CBL_MOUSE   |    |       |    |        |    |       | 2  | 2.31 | 12402  |
| C-C chemokine receptor type 10 (C-Cr1) (CC-CKR-10) (CCR-10) (Chemokine                   | Q9JL21 | CCR10_MOUSE |    |       |    |        | 1  | 0.07  |    |      | 12777  |
| CCR4-NOT transcription complex, subunit 10 (Mus musculus 10 days neonate skin c          | Q8BH15 | Q8BH15      | 2  | 1.14  | 2  | 1.47   | 1  | 1.97  | 1  | 0.60 |        |
| CD2-associated protein (Mesenchymal-to-epithelium transition protein with SH3 domai      | Q9JLQ0 | CD2AP_MOUSE | 6  | 1.35  | 3  | 0.74   |    |       |    |      | 12488  |
| Cd81 protein (Tapa-1 protein)                                                            | Q91V78 | Q91V78      | 2  | 1.38  | 5  | 1.72   | 1  | 1.42  | 7  | 0.84 |        |
| CD9 antigen                                                                              | P40240 | CD9_MOUSE   | 2  | 2.62  | 4  | 4.99   |    |       | 8  | 0.92 | 12527  |
| Cdc27 protein                                                                            | Q8R568 | Q8R568      |    |       |    |        |    |       | 1  | 2.97 |        |
| Cdc42 protein                                                                            | Q6P201 | Q6P201      | 3  | 1.28  | 3  | 1.24   | 2  | 1.27  | 2  | 0.91 |        |
| CDC42-binding protein kinase beta                                                        | Q7TT50 | Q7TT50      | 2  | 1.44  | 2  | 1.12   |    |       |    |      |        |
| CDK5 regulatory subunit associated protein 3 (CDK5 activator-binding protein C53)        | Q99LM2 | CK5P3_MOUSE | 1  | 0.47  | 1  | 1.20   |    |       |    |      | 80280  |
| CDK-activating kinase assembly factor MAT1 (RING finger protein MAT1) (Menage a          | P51949 | MAT1_MOUSE  |    |       |    |        |    |       | 1  | 1.33 | 17420  |
| CDNA sequence BC003331                                                                   | Q99J66 | Q99J66      | 3  | 0.72  | 1  | 2.69   |    |       |    |      |        |
| CDNA sequence BC008155                                                                   | Q91VW0 | Q91VW0      | 1  | 1.62  | 2  | 1.06   |    |       | 2  | 0.97 |        |
| CDNA sequence BC017158                                                                   | Q91W34 | Q91W34      | 1  | 0.83  |    |        |    |       |    |      |        |
| CDNA sequence BC018371 (Mus musculus adult male diencephalon cDNA, RIKEN fr              | Q8VCW8 | Q8VCW8      | 6  | 2.15  | 5  | 3.07   | 3  | 0.80  | 2  | 1.71 |        |
| CDNA sequence BC021917                                                                   | Q8VC30 | Q8VC30      | 1  | 6.36  |    |        |    |       |    |      |        |
| CDNA sequence BC022146                                                                   | Q8VC03 | Q8VC03      | 1  | 2.43  | 2  | 0.90   | 1  | 1.68  |    |      |        |
| CDNA sequence BC022641                                                                   | Q7TS78 | Q7TS78      | 1  | 0.23  | 1  | 1.51   |    |       | 5  | 1.22 |        |
| CDNA sequence BC025641                                                                   | Q8R3C0 | Q8R3C0      |    |       | 1  | 0.91   |    |       |    |      |        |
| CDNA sequence BC027073                                                                   | Q8CFI5 | Q8CFI5      |    |       |    |        | 1  | 3.67  |    |      |        |
| CDNA sequence BC031781                                                                   | Q8K1J5 | Q8K1J5      | 1  | 1.51  | 2  | 3.15   | 1  | 1.37  | 2  | 1.32 |        |
| CDNA sequence BC034099 (Mus musculus 10 days neonate cortex cDNA, RIKEN fu               | Q8K248 | Q8K248      |    |       |    |        |    |       | 1  | 0.05 |        |
| CDNA sequence BC063749                                                                   | Q6P400 | Q6P400      | 1  | 1.51  | 2  | 2.10   |    |       |    |      |        |
| CDO                                                                                      | O88971 | O88971      | 2  | 0.61  | 4  | 2.68   | 2  | 0.96  | 3  | 0.79 |        |
| Cell division control protein 2 homolog (EC 2.7.1.37) (p34 protein kinase) (Cyclin-depr  | P11440 | CDC2_MOUSE  | 3  | 2.41  | 1  | 1.72   | 2  | 1.09  | 3  | 2.45 | 12534  |
| Cell division cycle protein 16 homolog (Anaphase promoting complex subunit 6) (APC       | Q8R349 | CDC16_MOUSE | 2  | 1.66  | 1  | 0.88   |    |       |    |      | 69957  |

|                                                                                               |             |    |      |    |       |    |      |    |       |        |
|-----------------------------------------------------------------------------------------------|-------------|----|------|----|-------|----|------|----|-------|--------|
| Cell division cycle protein 23 homolog (Anaphase promoting complex subunit 8) (APC Q8BGZ4     | CDC23_MOUSE | 2  | 0.71 | 5  | 2.10  |    |      | 7  | 1.23  | 52563  |
| Cell division protein kinase 2 (EC 2.7.1.37) P97377                                           | CDK2_MOUSE  | 2  | 2.70 |    |       |    |      |    |       | 12566  |
| Cell division protein kinase 4 (EC 2.7.1.37) (Cyclin-dependent kinase 4) (PSK-J3) (CR P30285  | CDK4_MOUSE  | 2  | 1.07 | 1  | 1.61  | 1  | 1.70 | 3  | 2.04  | 12567  |
| Cell division protein kinase 9 (EC 2.7.1.37) (Cyclin-dependent kinase 9) Q99J95               | CDK9_MOUSE  | 1  | 1.42 | 1  | 2.80  | 1  | 1.69 |    |       |        |
| Cellular nucleic acid binding protein (CNBP) (Zinc finger protein 9) P53996                   | CNBP_MOUSE  | 18 | 2.40 | 24 | 3.55  | 7  | 1.62 | 21 | 1.80  | 12785  |
| Centaurin, beta 5 Q6NXL5                                                                      | Q6NXL5      |    |      | 1  | 1.40  |    |      | 1  | 0.04  |        |
| Centromere protein C (CENP-C) (Centromere autoantigen C) P49452                               | CENPC_MOUSE | 1  | 3.55 |    |       |    |      |    |       | 12617  |
| Centromere/kinetochore protein zw10 homolog Q921H3                                            | Q921H3      | 1  | 0.58 |    |       |    |      |    |       |        |
| Ceruloplasmin precursor (EC 1.16.3.1) (Ferroxidase) Q61147                                    | CERU_MOUSE  | 9  | 1.39 | 9  | 2.25  | 1  | 0.38 | 2  | 0.90  | 12870  |
| CGI-121 protein (1810034M08Rik protein) Q8QZZ7                                                | Q8QZZ7      | 2  | 1.91 |    |       | 1  | 1.04 |    |       |        |
| Chloride anion exchanger (DRA protein) (Down-regulated in adenoma) (Solute carrier Q9WVC8     | S26A3_MOUSE |    |      |    |       |    |      | 1  | 33.27 | 13487  |
| Chloride channel protein 2 (ClC-2) Q9R0A1                                                     | CLCN2_MOUSE | 1  | 4.93 |    |       |    |      |    |       | 12724  |
| Chloride intracellular channel protein 1 (Nuclear chloride ion channel 27) (NCC27) (pE Q9Z1Q5 | CLIC1_MOUSE | 19 | 1.82 | 23 | 1.74  | 7  | 1.66 | 8  | 1.38  | 114584 |
| Chloride intracellular channel protein 4 (mc3s5/mtCLIC) Q9QYB1                                | CLIC4_MOUSE | 4  | 1.98 | 2  | 1.28  | 1  | 0.59 | 1  | 1.19  | 29876  |
| Choline-phosphate cytidyltransferase A (EC 2.7.7.15) (Phosphorylcholine transferas P49586     | PCY1A_MOUSE | 1  | 1.97 |    |       |    |      |    |       | 13026  |
| Chondroitin sulfate synthase 1 (EC 2.4.1.175) (Glucuronosyl-N-acetylgalactosaminyl- Q6ZQ11    | CHSS1_MOUSE |    |      |    |       |    |      | 2  | 0.82  |        |
| Chondroitin sulfate synthase 2 (EC 2.4.1.175) (Glucuronosyl-N-acetylgalactosaminyl- Q6IQX7    | CHSS2_MOUSE | 1  | 1.23 | 1  | 0.53  |    |      | 2  | 2.74  |        |
| Chromatin assembly factor 1 subunit A (CAF-1 subunit A) (Chromatin assembly factor Q9QWF0     | CAF1A_MOUSE |    |      | 1  | 1.49  |    |      | 1  | 2.81  | 27221  |
| Chromatin assembly factor 1 subunit B (CAF-1 subunit B) (Chromatin assembly factor Q9D0N7     | CAF1B_MOUSE |    |      | 1  | 1.70  |    |      |    |       | 110749 |
| Chromatin assembly factor 1 subunit C (CAF-1 subunit C) (Chromatin assembly factor Q60972     | RBBP4_MOUSE | 6  | 0.95 | 5  | 2.03  |    |      |    |       | 19646  |
| Chromatin-specific transcription elongation factor, 140 kDa subunit Q920B9                    | Q920B9      | 2  | 1.28 | 2  | 1.15  |    |      |    |       |        |
| Chromodomain helicase-DNA-binding protein 4 (CHD-4) Q6PDQ2                                    | CHD4_MOUSE  |    |      | 2  | 0.67  | 1  | 0.85 | 4  | 1.52  | 107932 |
| Chromosome-associated kinesin KIF4A (Chromokinesin) P33174                                    | KIF4A_MOUSE | 1  | 0.79 |    |       |    |      |    |       | 16571  |
| CIP1 (Solute carrier family 12 (Potassium/chloride transporters), member 9) (Cation-c Q99MR3  | Q99MR3      | 1  | 1.14 |    |       |    |      |    |       |        |
| Cipp protein Q80YR8                                                                           | Q80YR8      |    |      | 1  | 1.02  |    |      | 1  | 0.94  |        |
| Cisplatin resistance-associated overexpressed protein (Novel protein) (3300001P08R Q921Z3     | Q921Z3      |    |      |    |       |    |      | 3  | 1.33  |        |
| Citrate lyase beta subunit Q8R4N0                                                             | Q8R4N0      | 7  | 1.70 | 5  | 1.79  | 7  | 1.05 | 3  | 0.90  |        |
| Class I (Qa) Q2k antigen Q31218                                                               | Q31218      |    |      | 1  | 0.13  |    |      |    |       |        |
| Clast3 protein (Mus musculus 8 days embryo whole body cDNA, RIKEN full-length en Q9EST4       | Q9EST4      | 2  | 0.90 | 1  | 0.61  | 1  | 1.09 |    |       |        |
| Cleavage and polyadenylation specificity factor 3 Q8CIM0                                      | Q8CIM0      | 3  | 0.82 |    |       |    |      |    |       |        |
| Cleavage and polyadenylation specificity factor, 100 kDa subunit (CPSF 100 kDa sub Q35218     | CPSF2_MOUSE | 5  | 1.24 | 4  | 1.72  | 1  | 1.16 | 2  | 3.16  | 51786  |
| Cleavage and polyadenylation specificity factor, 160 kDa subunit (CPSF 160 kDa sub Q9EPU4     | CPSF1_MOUSE |    |      | 1  | 1.17  | 1  | 0.72 |    |       | 94230  |
| Cleavage and polyadenylation specificity factor, 30 kDa subunit (CPSF 30 kDa subun Q8BQZ5     | CPSF4_MOUSE | 1  | 3.74 | 1  | 3.01  |    |      | 1  | 1.25  | 54188  |
| Cleavage stimulation factor, 3' pre-RNA, subunit 1 (Mus musculus 9 days embryo whc Q99LC2     | Q99LC2      | 2  | 1.14 | 1  | 0.82  | 1  | 1.35 | 2  | 1.68  |        |
| Cleavage stimulation factor, 3' pre-RNA, subunit 3 Q99L17                                     | Q99L17      | 1  | 0.97 | 1  | 1.01  | 2  | 1.04 | 1  | 1.03  |        |
| Clptm1 protein Q8VBZ3                                                                         | Q8VBZ3      |    |      | 1  | 0.76  |    |      | 1  | 1.69  |        |
| Coatomer beta subunit (Beta-coat protein) (Beta-COP) Q9JIF7                                   | COPB_MOUSE  | 22 | 1.38 | 17 | 1.08  | 13 | 1.61 | 6  | 1.08  | 70349  |
| Coatomer beta' subunit (Beta'-coat protein) (Beta'-COP) (p102) O55029                         | COPB2_MOUSE | 8  | 1.26 | 6  | 0.82  | 6  | 1.20 | 4  | 0.87  | 50797  |
| Coatomer gamma-2 subunit (Gamma-2 coat protein) (Gamma-2 COP) Q9QXK3                          | COPG2_MOUSE | 8  | 1.47 | 9  | 1.48  | 2  | 1.41 | 3  | 1.49  | 54160  |
| Cob(II)yrinic acid a,c-diamide adenosyltransferase, mitochondrial precursor (EC 2.5.1. Q9D273 | MMAB_MOUSE  | 2  | 1.40 | 1  | 1.62  |    |      |    |       | 77697  |
| Coding region determinant binding protein (Mus musculus 13 days embryo head cDN O88477        | O88477      | 2  | 1.66 | 4  | 1.54  | 2  | 1.46 | 6  | 0.98  |        |
| Cofilin, muscle isoform (Cofilin-2) P45591                                                    | COF2_MOUSE  | 3  | 1.43 | 4  | 1.88  |    |      |    |       | 12632  |
| Cofilin, non-muscle isoform (Cofilin-1) P18760                                                | COF1_MOUSE  | 5  | 1.87 | 4  | 1.61  | 5  | 1.23 | 5  | 2.25  | 12631  |
| Cohesin subunit SA-2 (Stromal antigen 2) (SCC3 homolog 2) O35638                              | STAG2_MOUSE | 2  | 1.18 | 8  | 2.02  | 3  | 1.28 | 4  | 1.12  | 20843  |
| Coiled-coil alpha-helical rod protein 1 (Alpha helical coiled-coil rod protein) Q8K212        | CCHCR_MOUSE |    |      |    |       |    |      | 1  | 4.75  | 240084 |
| Coiled-coil protein (Transcription factor) Q9ESK9                                             | Q9ESK9      | 1  | 1.12 | 2  | 1.04  |    |      | 2  | 1.28  |        |
| Coiled-coil-helix-coiled-coil-helix domain containing 4 (Mus musculus 10, 11 days emt Q8VEA4  | Q8VEA4      |    |      | 3  | 1.51  |    |      |    |       |        |
| Collagen a1(V) O88207                                                                         | O88207      | 2  | 1.02 | 2  | 1.08  | 1  | 1.57 | 2  | 1.38  |        |
| Collagen alpha 1(IV) chain precursor P02463                                                   | CO4A1_MOUSE |    |      |    |       |    |      | 1  | 27.05 | 12826  |
| Collagen alpha 1(VI) chain precursor Q04857                                                   | CO6A1_MOUSE | 4  | 1.16 | 5  | 3.26  | 1  | 2.06 | 4  | 1.79  | 12833  |
| Collagen alpha 1(XII) chain precursor Q60847                                                  | COCA1_MOUSE | 10 | 1.34 | 13 | 2.77  | 5  | 1.12 | 13 | 1.78  | 12816  |
| Collagen alpha 2(I) chain precursor Q01149                                                    | CO1A2_MOUSE | 17 | 1.33 | 22 | 1.34  | 13 | 0.81 | 17 | 0.91  | 12843  |
| Collagen alpha 2(IV) chain precursor P08122                                                   | CO4A2_MOUSE | 1  | 0.74 | 1  | 1.37  |    |      |    |       | 12827  |
| Collagen alpha3(VI) precursor (Fragment) Q9Z019                                               | Q9Z019      | 1  | 1.58 |    |       |    |      |    |       |        |
| Collectin placenta 1 (Colec12 protein) Q8K4Q8                                                 | Q8K4Q8      | 1  | 1.28 |    |       |    |      |    |       |        |
| COMM domain containing protein 3 (Bmi-1 upstream gene protein) (Bup protein) Q63829           | COMD3_MOUSE | 5  | 1.88 | 4  | 1.31  | 4  | 1.81 | 7  | 1.44  | 12238  |
| Complement factor B precursor (EC 3.4.21.47) (C3/C5 convertase) P04186                        | CFAB_MOUSE  |    |      | 2  | 4.27  |    |      | 4  | 2.96  | 14962  |
| Condensin subunit 1 (Chromosome condensation-related SMC-associated protein 1) Q8K2Z4         | CND1_MOUSE  |    |      |    |       |    |      | 6  | 3.80  | 68298  |
| Condensin subunit 2 (Barren homolog protein 1) (Chromosome-associated protein H) Q8C156       | CND2_MOUSE  |    |      |    |       |    |      | 1  | 3.42  | 215387 |
| Conserved oligomeric Golgi complex component 1 (Low density lipoprotein receptor d Q9Z160     | COG1_MOUSE  |    |      |    |       | 3  | 1.49 | 4  | 1.19  | 16834  |
| Conserved oligomeric Golgi complex component 8 Q9JJA2                                         | COG8_MOUSE  | 1  | 3.19 | 1  | 22.00 |    |      |    |       | 97484  |



|                                                                                                                          |        |             |    |      |    |      |   |      |    |       |  |  |        |
|--------------------------------------------------------------------------------------------------------------------------|--------|-------------|----|------|----|------|---|------|----|-------|--|--|--------|
| Contactin 5 precursor (Neural recognition molecule NB-2)                                                                 | P68500 | CNTN5_MOUSE |    |      | 1  | 0.08 |   |      |    |       |  |  |        |
| COP9 signalosome complex subunit 1 (Signalosome subunit 1) (SGN1) (JAB1-containing)                                      | Q99LD4 | CSN1_MOUSE  | 1  | 2.24 | 3  | 0.90 |   |      |    |       |  |  | 209318 |
| COP9 signalosome complex subunit 3 (Signalosome subunit 3) (SGN3) (JAB1-containing)                                      | O88543 | CSN3_MOUSE  | 5  | 0.98 |    |      |   |      | 1  | 6.13  |  |  | 26572  |
| COP9 signalosome complex subunit 4 (Signalosome subunit 4) (SGN4) (JAB1-containing)                                      | O88544 | CSN4_MOUSE  | 8  | 1.62 | 9  | 1.13 | 2 | 1.60 | 4  | 1.04  |  |  | 26891  |
| COP9 signalosome complex subunit 6 (Signalosome subunit 6) (SGN6) (JAB1-containing)                                      | O88545 | CSN6_MOUSE  |    |      | 3  | 1.90 |   |      | 2  | 1.28  |  |  | 26893  |
| COP9 signalosome complex subunit 7a (Signalosome subunit 7a) (SGN7a) (JAB1-containing)                                   | Q9CZ04 | CSN7A_MOUSE | 2  | 1.64 | 5  | 0.90 |   |      | 8  | 1.27  |  |  | 26894  |
| COP9 signalosome complex subunit 7b (Signalosome subunit 7b) (SGN7b) (JAB1-containing)                                   | Q8BV13 | CSN7B_MOUSE | 1  | 1.25 |    |      | 1 | 0.87 |    |       |  |  | 26895  |
| Cop-coated vesicle membrane protein p24 precursor (p24A) (Sid 394)                                                       | Q9R0Q3 | P24_MOUSE   |    |      | 2  | 1.20 |   |      |    |       |  |  | 56334  |
| Copine I                                                                                                                 | Q8C166 | CPNE1_MOUSE | 6  | 2.14 | 6  | 1.56 | 4 | 1.51 | 11 | 1.72  |  |  | 266692 |
| Copine II                                                                                                                | P59108 | CPNE2_MOUSE | 1  | 2.41 | 2  | 1.02 |   |      |    |       |  |  | 234577 |
| Copine III                                                                                                               | Q8BT60 | CPNE3_MOUSE | 3  | 1.81 | 2  | 3.89 | 2 | 1.31 |    |       |  |  | 70568  |
| Copper chaperone for superoxide dismutase (Superoxide dismutase copper chaperone)                                        | Q9WU84 | CCS_MOUSE   |    |      |    |      |   |      | 3  | 1.96  |  |  | 12460  |
| Copper transport protein ATOX1 (Metal transport protein ATX1)                                                            | O08997 | ATOX1_MOUSE | 2  | 2.93 | 1  | 2.13 |   |      |    |       |  |  | 11927  |
| Copper-transporting ATPase 1 (EC 3.6.3.4) (Copper pump 1) (Menkes disease-associated)                                    | Q64430 | ATP7A_MOUSE | 1  | 3.20 | 1  | 0.74 | 1 | 0.85 |    |       |  |  | 11977  |
| Coproporphyrinogen III oxidase, mitochondrial precursor (EC 1.3.3.3) (Coproporphyrinogen III oxidase)                    | P36552 | HEM6_MOUSE  | 1  | 0.64 | 1  | 1.36 |   |      |    |       |  |  | 12892  |
| Corneodesmosin                                                                                                           | Q7TTC1 | Q7TTC1      | 1  | 2.80 |    |      |   |      |    |       |  |  |        |
| Coronin-1B (Coronin-2)                                                                                                   | Q9WUM3 | COR1B_MOUSE | 4  | 1.12 | 4  | 2.64 | 2 | 1.26 |    |       |  |  | 23789  |
| Coronin-1C (Coronin-3)                                                                                                   | Q9WUM4 | COR1C_MOUSE | 3  | 1.87 | 6  | 2.56 | 2 | 4.39 | 2  | 1.50  |  |  | 23790  |
| Corticotropin-releasing factor binding protein precursor (CRF-binding protein) (CRF-binding protein)                     | Q60571 | CRHBP_MOUSE |    |      | 1  | 0.14 |   |      |    |       |  |  | 12919  |
| COUP transcription factor 2 (COUP-TF2) (COUP-TF II) (Apolipoprotein AI regulatory factor)                                | P43135 | COT2_MOUSE  |    |      | 1  | 2.90 |   |      |    |       |  |  | 11819  |
| CpG binding protein (Protein containing PHD finger and CXXC domain 1) (CXXC finger protein)                              | Q9CWW7 | CXCC1_MOUSE |    |      | 3  | 1.23 |   |      |    |       |  |  | 74322  |
| Crk-like protein                                                                                                         | P47941 | CRKL_MOUSE  | 2  | 2.04 |    |      |   |      |    |       |  |  | 12929  |
| CTD small phosphatase-like protein (CTDSP-like) (Small C-terminal domain phosphatase)                                    | P58465 | CTDSL_MOUSE |    |      | 1  | 1.85 |   |      |    |       |  |  | 69274  |
| C-terminal binding protein 2 (CtBP2)                                                                                     | P56546 | CTBP2_MOUSE | 1  | 2.57 |    |      |   |      |    |       |  |  | 13017  |
| CTP synthase (EC 6.3.4.2) (UTP--ammonia ligase) (CTP synthetase)                                                         | P70698 | PYRG_MOUSE  | 8  | 1.76 | 10 | 1.05 | 3 | 1.97 | 4  | 1.11  |  |  | 51797  |
| CTP synthase (Cytidine 5'-triphosphate synthase 2) (Mus musculus adult male muscle)                                      | P70303 | P70303      | 16 | 1.63 | 7  | 1.23 | 3 | 1.26 | 4  | 1.22  |  |  |        |
| CUG triplet repeat RNA-binding protein 1 (CUG-BP1) (RNA-binding protein BRUNOL)                                          | P28659 | CUGB1_MOUSE | 1  | 1.90 | 2  | 4.49 | 1 | 1.95 |    |       |  |  | 13046  |
| Cullin homolog 1 (CUL-1)                                                                                                 | Q9WTX6 | CUL1_MOUSE  | 3  | 1.81 | 1  | 1.30 |   |      |    |       |  |  | 26965  |
| Cullin homolog 5 (CUL-5)                                                                                                 | Q9D5V5 | CUL5_MOUSE  | 1  | 1.34 |    |      |   |      | 1  | 0.89  |  |  | 75717  |
| Cwf191 protein                                                                                                           | Q8CI33 | Q8CI33      | 1  | 0.84 |    |      |   |      | 1  | 0.70  |  |  |        |
| Cyclin H                                                                                                                 | Q61458 | CCNH_MOUSE  | 2  | 1.82 | 2  | 0.95 |   |      | 1  | 0.42  |  |  | 66671  |
| Cyclin K                                                                                                                 | O88874 | CCNK_MOUSE  |    |      |    |      |   |      | 1  | 0.56  |  |  | 12454  |
| Cyclin-dependent kinase 6 inhibitor (p18-INK6) (Cyclin-dependent kinase 4 inhibitor C)                                   | C60772 | CDN2C_MOUSE |    |      | 2  | 0.50 |   |      |    |       |  |  | 12580  |
| Cyclin-dependent kinase inhibitor 1 (p21) (CDK-interacting protein 1) (Melanoma differentiation-associated)              | P39689 | CDN1A_MOUSE |    |      | 2  | 5.85 |   |      | 2  | 1.90  |  |  | 12575  |
| CYR61 protein precursor (Cysteine-rich, angiogenic inducer, 61) (Insulin-like growth factor binding protein 6)           | P18406 | CYR61_MOUSE | 3  | 2.86 | 6  | 9.16 | 1 | 0.42 | 6  | 1.04  |  |  | 16007  |
| Cysteine and glycine-rich protein 1 (Cysteine-rich protein 1) (CRP1) (CRP)                                               | P97315 | CSR1_MOUSE  | 1  | 2.21 | 8  | 4.75 | 1 | 0.93 | 4  | 1.16  |  |  | 13007  |
| Cysteine and histidine-rich protein                                                                                      | Q9QXA1 | Q9QXA1      | 2  | 1.25 | 2  | 1.26 |   |      |    |       |  |  |        |
| Cysteine sulfinic acid decarboxylase (EC 4.1.1.29) (Sulfinoalanine decarboxylase) (Cysteine sulfinic acid decarboxylase) | Q9DBE0 | CSAD_MOUSE  | 4  | 1.18 | 5  | 1.13 | 1 | 0.96 | 6  | 1.43  |  |  | 246277 |
| Cysteine-rich protein 2 (CRP2) (Heart LIM protein)                                                                       | Q9DCT8 | CRIP2_MOUSE |    |      | 3  | 1.82 |   |      | 4  | 1.93  |  |  | 68337  |
| Cysteine-rich protein NFX-1                                                                                              | Q9JKW7 | Q9JKW7      |    |      | 1  | 1.30 |   |      | 1  | 3.46  |  |  |        |
| Cysteine-rich secretory protein-2 precursor (CRISP-2) (Testis-specific protein TPX-1)                                    | P16563 | CRIS2_MOUSE |    |      |    |      |   |      | 1  | 0.50  |  |  | 22024  |
| Cysteinyl-tRNA synthetase (EC 6.1.1.16) (Cysteine--tRNA ligase) (CysRS)                                                  | Q9ER72 | SYC_MOUSE   | 4  | 1.21 | 7  | 1.15 | 5 | 1.36 | 4  | 1.53  |  |  | 27267  |
| Cytidine deaminase (EC 3.5.4.5) (Cytidine aminohydrolase)                                                                | P56389 | CDD_MOUSE   |    |      | 1  | 2.51 | 3 | 1.89 | 3  | 2.26  |  |  |        |
| Cytochrome c oxidase copper chaperone                                                                                    | P56394 | COX17_MOUSE |    |      | 1  | 2.75 | 1 | 0.83 | 3  | 2.17  |  |  |        |
| Cytochrome c oxidase polypeptide VIb (EC 1.9.3.1) (Cytochrome c oxidase subunit VIb)                                     | P56391 | COX6B_MOUSE | 5  | 1.19 | 5  | 1.10 | 6 | 1.39 | 7  | 1.24  |  |  | 110323 |
| Cytochrome c oxidase subunit 2 (EC 1.9.3.1) (Cytochrome c oxidase polypeptide II)                                        | P00405 | COX2_MOUSE  |    |      | 1  | 0.21 |   |      | 2  | 29.57 |  |  | 17709  |
| Cytochrome P450 3A25 (EC 1.14.14.1) (CYP3A25)                                                                            | O09158 | CP3AP_MOUSE |    |      | 2  | 0.18 |   |      | 1  | 0.27  |  |  | 56388  |
| Cytokine receptor-like factor 1 precursor (Cytokine-like factor-1) (CLF-1) (Cytokine receptor-like factor 1)             | Q9JMS8 | CRFL1_MOUSE | 3  | 1.31 | 3  | 1.09 | 3 | 2.88 | 3  | 1.45  |  |  | 12931  |
| Cytokine-like nuclear factor n-pac                                                                                       | Q922P9 | Q922P9      | 4  | 1.19 | 2  | 1.09 | 3 | 1.34 | 3  | 0.93  |  |  |        |
| Cytoplasmic dynein heavy chain 2 (Fragment)                                                                              | Q5VI62 | Q5VI62      | 1  | 2.26 |    |      |   |      |    |       |  |  |        |
| Cytoskeletal protein                                                                                                     | O08614 | O08614      | 9  | 1.43 | 13 | 1.36 | 4 | 1.33 |    |       |  |  |        |
| Cytosolic acyl coenzyme A thioester hydrolase (EC 3.1.2.2) (Long chain acyl-CoA thioester hydrolase)                     | Q91V12 | BACH_MOUSE  | 4  | 1.58 | 3  | 1.22 | 3 | 1.23 | 4  | 1.18  |  |  | 70025  |
| Cytosolic phospholipase A2 (cPLA2) (Phospholipase A2 group IVA) [Includes: Phospholipase A2]                             | P47713 | PA24A_MOUSE | 5  | 2.04 | 4  | 0.68 |   |      | 3  | 1.04  |  |  | 18783  |
| D(3) dopamine receptor                                                                                                   | P30728 | DRD3_MOUSE  | 1  | 0.08 |    |      |   |      |    |       |  |  | 13490  |
| D10Erd802e protein                                                                                                       | Q8CFE4 | Q8CFE4      | 1  | 0.56 |    |      |   |      |    |       |  |  |        |
| D15Mgi27 protein (Mus musculus NOD-derived CD11c +ve dendritic cells cDNA, RIKEN)                                        | Q921Y4 | Q921Y4      |    |      |    |      |   |      | 1  | 0.60  |  |  |        |
| D4Wsu114e protein                                                                                                        | Q8CFZ8 | Q8CFZ8      |    |      |    |      |   |      | 1  | 1.42  |  |  |        |
| D7Wsu128e protein                                                                                                        | Q78JW9 | Q78JW9      |    |      |    |      |   |      | 1  | 0.36  |  |  |        |
| DAZ-associated protein 1 (Deleted in azoospermia-associated protein 1)                                                   | Q9JII5 | DAZP1_MOUSE | 3  | 1.93 | 4  | 1.56 |   |      |    |       |  |  | 70248  |
| DBY protein (DEAD (Asp-Glu-Ala-Asp) box polypeptide 3, Y-linked)                                                         | Q9QWS9 | Q9QWS9      | 1  | 1.24 | 2  | 2.11 | 2 | 1.63 |    |       |  |  |        |
| DCC-interacting protein 13 alpha (Dip13 alpha) (Adapter protein containing PH domain)                                    | Q8K3H0 | DP13A_MOUSE |    |      |    |      |   |      | 2  | 4.19  |  |  |        |

|                                                                                              |             |    |       |    |       |    |      |  |  |    |      |      |       |
|----------------------------------------------------------------------------------------------|-------------|----|-------|----|-------|----|------|--|--|----|------|------|-------|
| DCC-interacting protein 13 beta (Dip13 beta) (Adapter protein containing PH domain, Q8K3G9)  | DP13B_MOUSE | 1  | 0.04  |    |       |    |      |  |  |    |      |      |       |
| D-dopachrome tautomerase (EC 5.3.3.-)                                                        | DOPD_MOUSE  | 3  | 1.65  |    |       | 1  | 0.36 |  |  |    |      |      | 13202 |
| Ddx41 protein                                                                                | Q91VN6      | 1  | 1.11  |    |       |    |      |  |  |    | 2    | 1.36 |       |
| DEAD (Asp-Glu-Ala-Asp) box polypeptide 1 (Mus musculus 12 days embryo embryon Q91VR5)        | Q91VR5      | 16 | 1.66  | 13 | 2.27  | 9  | 1.01 |  |  | 15 | 1.21 |      |       |
| DEAD (Asp-Glu-Ala-Asp) box polypeptide 42                                                    | Q810A7      | 4  | 2.09  | 5  | 1.40  |    |      |  |  | 5  | 1.21 |      |       |
| DEAD/H box polypeptide 36 protein                                                            | Q8VHK9      | 3  | 1.47  | 3  | 3.10  |    |      |  |  | 1  | 0.48 |      |       |
| DEAD/H box polypeptide RIG-I                                                                 | Q6Q899      | 2  | 2.60  | 2  | 0.97  | 2  | 1.69 |  |  | 1  | 0.17 |      |       |
| DEAD-box protein 3, X-chromosomal (DEAD-box RNA helicase DEAD3) (mDEAD3) (Q62167)            | DDX3X_MOUSE | 2  | 1.21  | 4  | 1.18  | 2  | 1.42 |  |  | 2  | 1.24 |      | 13205 |
| DEAD-box protein 47 (EC 3.6.1.-)                                                             | Q9CWX9      |    |       | 1  | 4.31  |    |      |  |  |    |      |      | 67755 |
| DEAD-box protein 52 (EC 3.6.1.-) (Putative ATP-dependent RNA helicase ROK1-like) Q8K301      | DDX52_MOUSE | 1  | 1.78  |    |       |    |      |  |  |    |      |      | 78394 |
| DEAH (Asp-Glu-Ala-His) box polypeptide 35                                                    | Q8K1G9      |    |       |    |       |    |      |  |  | 1  | 0.19 |      |       |
| Death associated transcription factor 1 (Death inducer-obliterator-1) (DIO-1)                | Q8C9B9      |    |       |    |       |    |      |  |  | 1  | 5.05 |      | 23856 |
| Death domain containing membrane protein NRADD                                               | Q8CJ26      |    |       |    |       |    |      |  |  | 1  | 0.94 |      |       |
| Decorin precursor (Bone proteoglycan II) (PG-S2) (PG40)                                      | P28654      |    |       | 1  | 0.98  |    |      |  |  | 2  | 0.32 |      | 13179 |
| Dehydrodolichyl diphosphate synthase (EC 2.5.1.-) (Dedol-PP synthase)                        | Q99KU1      | 1  | 0.66  |    |       |    |      |  |  |    |      |      | 67422 |
| Dehydrogenase/reductase SDR family member 1 (EC 1.1.-.-)                                     | Q99L04      | 15 | 1.55  | 13 | 1.71  | 9  | 1.71 |  |  | 6  | 0.89 |      | 52585 |
| Dehydrogenase/reductase SDR family member 4 (EC 1.1.1.184) (NADPH-dependent Q99LB2)          | DHRS4_MOUSE | 1  | 0.96  |    |       |    |      |  |  |    |      |      |       |
| Delta 1-pyrroline-5-carboxylate synthetase (P5CS) (Aldehyde dehydrogenase 18 fami Q9Z110)    | P5CS_MOUSE  | 6  | 1.89  | 7  | 2.24  | 4  | 1.44 |  |  | 6  | 7.07 |      | 56454 |
| Delta3,5-delta2,4-dienoyl-CoA isomerase, mitochondrial precursor (EC 5.3.3.-)                | O35459      | 2  | 1.26  | 7  | 2.02  | 3  | 0.94 |  |  | 1  | 1.17 |      | 51798 |
| Delta-aminolevulinic acid dehydratase (EC 4.2.1.24) (Porphobilinogen synthase) (ALP 10518)   | HEM2_MOUSE  | 6  | 1.31  | 7  | 0.84  | 6  | 1.57 |  |  | 6  | 1.15 |      | 17025 |
| Delta-like protein 3 precursor (Drosophila Delta homolog 3) (M-Delta-3)                      | O88516      |    |       | 1  | 0.30  |    |      |  |  |    |      |      | 13389 |
| Deltex protein 3 (Deltex-3) (Deltex3) (mDTX3)                                                | Q80V91      |    |       | 1  | 2.50  |    |      |  |  | 2  | 0.94 |      | 80904 |
| Dendritic cell protein GA17 (Mus musculus 8 days embryo whole body cDNA, RIKEN Q99JX4)       | Q99JX4      | 6  | 1.32  | 4  | 1.55  | 2  | 1.86 |  |  | 1  | 1.19 |      |       |
| Density-regulated protein (DRP)                                                              | Q9CQJ6      |    |       | 1  | 1.95  |    |      |  |  | 1  | 1.39 |      | 68184 |
| Deoxyribonuclease II alpha precursor (EC 3.1.22.1) (DNase II alpha) (Acid DNase) (L: P56542) | DNS2A_MOUSE |    |       | 3  | 1.70  | 1  | 0.49 |  |  |    |      |      | 13423 |
| Desmoglein-4 precursor                                                                       | Q7TMD7      |    |       | 1  | 0.11  |    |      |  |  |    |      |      |       |
| Destrin (Actin-depolymerizing factor) (ADF) (Sid 23)                                         | Q9R0P5      | 21 | 2.05  | 20 | 3.53  | 6  | 2.46 |  |  | 8  | 1.43 |      | 56431 |
| DET1 homolog (De-etiolated-1 homolog)                                                        | Q9D0A0      |    |       |    |       |    |      |  |  | 1  | 0.72 |      | 76375 |
| Developmentally regulated GTP-binding protein 1 (DRG1) (Nedd3 protein)                       | P32233      | 3  | 1.38  | 4  | 1.17  | 2  | 1.38 |  |  | 2  | 0.93 |      | 13494 |
| DGCR8 protein (DiGeorge syndrome critical region 8 homolog) (Gy1)                            | Q9EQM6      | 1  | 1.42  | 4  | 1.36  |    |      |  |  | 1  | 4.03 |      | 94223 |
| DHHC-containing protein 8                                                                    | Q5Y5T5      |    |       |    |       |    |      |  |  | 1  | 0.18 |      |       |
| Dhx29 protein (DEAH (Asp-Glu-Ala-His) box polypeptide 29)                                    | Q6PGC1      | 3  | 2.45  | 4  | 1.60  | 1  | 5.46 |  |  | 5  | 2.17 |      |       |
| Dhx37 protein                                                                                | Q6NZL1      |    |       | 1  | 0.14  |    |      |  |  |    |      |      |       |
| Diaphanous protein homolog 2 (Diaphanous-related formin 2) (DRF2) (mDia3)                    | O70566      | 1  | 0.16  |    |       |    |      |  |  |    |      |      | 54004 |
| Dickkopf related protein-3 precursor (Dkk-3) (Dickkopf-3) (mDkk-3)                           | Q9QUN9      |    |       |    |       | 3  | 2.86 |  |  | 4  | 2.05 |      | 50781 |
| Dihydrofolate reductase (EC 1.5.1.3)                                                         | P00375      | 2  | 5.22  |    |       |    |      |  |  |    |      |      | 13361 |
| Dihydropyrimidinase related protein-3 (DRP-3) (Unc-33-like phosphoprotein) (ULIP pr Q62188)  | DPYL3_MOUSE | 4  | 1.38  | 4  | 1.09  | 2  | 1.94 |  |  |    |      |      | 22240 |
| Dihydroxyacetone phosphate acyltransferase (EC 2.3.1.42) (DHAP-AT) (DAP-AT) (GI P98192)      | GNPAT_MOUSE | 2  | 1.08  | 1  | 0.47  | 2  | 1.84 |  |  | 2  | 1.70 |      | 14712 |
| Dipeptidylpeptidase 8                                                                        | Q80YA7      |    |       |    |       |    |      |  |  | 2  | 1.69 |      |       |
| Diphosphoinositol polyphosphate phosphohydrolase (Nudt3 protein) (Nudix (Nucleotic Q9JI46)   | Q9JI46      | 2  | 3.62  | 2  | 1.83  | 3  | 2.74 |  |  |    |      |      |       |
| Disabled homolog 2 (DOC-2) (Mitogen-responsive phosphoprotein)                               | P98078      |    |       |    |       |    |      |  |  | 1  | 2.34 |      | 13132 |
| Discoidin, CUB and LCCL domain containing protein 2 precursor (Endothelial and sm Q91ZV3)    | DCBD2_MOUSE |    |       | 1  | 0.54  |    |      |  |  | 1  | 1.31 |      |       |
| Disp1-pending protein                                                                        | Q80ZZ8      |    |       | 2  | 1.99  |    |      |  |  | 2  | 1.30 |      |       |
| DJ-1 protein                                                                                 | Q99LX0      | 7  | 2.11  | 5  | 1.56  | 3  | 1.55 |  |  | 7  | 2.18 |      | 57320 |
| DNA mismatch repair protein Msh2                                                             | P43247      | 1  | 2.44  |    |       |    |      |  |  |    |      |      | 17685 |
| DNA polymerase alpha catalytic subunit (EC 2.7.7.7)                                          | P33609      | 4  | 2.17  | 4  | 1.56  | 3  | 1.13 |  |  | 6  | 1.76 |      | 18968 |
| DNA polymerase delta subunit 2 (EC 2.7.7.7) (DNA polymerase delta subunit p50)               | O35654      | 1  | 18.70 | 1  |       | 1  | 1.68 |  |  | 3  | 3.39 |      | 18972 |
| DNA polymerase epsilon, catalytic subunit A (EC 2.7.7.7) (DNA polymerase II subunit Q9WVF7)  | DPOE1_MOUSE |    |       | 1  | 24.06 |    |      |  |  |    |      |      | 18973 |
| DNA primase small subunit (EC 2.7.7.-) (DNA primase 49 kDa subunit) (p49)                    | PRI1_MOUSE  | 2  | 1.78  | 1  | 4.52  |    |      |  |  | 1  | 2.17 |      | 19075 |
| DNA repair and recombination protein RAD54-like (EC 3.6.1.-) (RAD54 homolog) (mR P70270)     | RAD54_MOUSE | 1  | 0.90  |    |       |    |      |  |  |    |      |      | 19366 |
| DNA repair protein RAD50 (EC 3.6.-.-) (mRad50)                                               | P70388      | 2  | 0.88  | 1  | 0.93  |    |      |  |  |    |      |      |       |
| DNA repair protein RAD51 homolog 1                                                           | Q08297      |    |       |    |       |    |      |  |  | 1  | 0.34 |      | 19361 |
| DNA replication factor Cdt1 (Double parked homolog) (DUP) (Retroviral insertion site Q8R4E9) | CDT1_MOUSE  |    |       | 1  | 0.09  |    |      |  |  |    |      |      | 67177 |
| DNA replication licensing factor MCM2 (Minichromosome maintenance protein 2 hom P97310)      | MCM2_MOUSE  | 7  | 1.39  | 8  | 1.12  | 3  | 1.09 |  |  | 1  | 1.18 |      | 17216 |
| DNA replication licensing factor MCM3 (DNA polymerase alpha holoenzyme-associat P25206)      | MCM3_MOUSE  | 23 | 1.27  | 26 | 1.35  | 9  | 0.87 |  |  | 6  | 1.47 |      | 17215 |
| DNA replication licensing factor MCM4 (CDC21 homolog) (P1-CDC21)                             | P49717      | 6  | 1.13  | 4  | 0.69  |    |      |  |  | 1  | 3.49 |      | 17217 |
| DNA replication licensing factor MCM6 (Mis5 homolog)                                         | P97311      | 29 | 2.03  | 28 | 1.43  | 14 | 1.20 |  |  | 18 | 1.43 |      | 17219 |
| DNA replication licensing factor MCM7 (CDC47 homolog)                                        | Q61881      | 4  | 1.11  | 8  | 1.39  | 2  | 0.98 |  |  | 1  | 1.37 |      | 17220 |
| DNA segment, Chr 3, Wayne State University 161, expressed                                    | Q8K2Y6      | 1  | 1.57  | 1  | 1.12  | 3  | 2.60 |  |  |    |      |      |       |
| DNA segment, Chr 5, Wayne State University 46, expressed                                     | Q8K3A9      |    |       | 1  | 1.21  |    |      |  |  | 2  | 0.33 |      |       |
| DNA segment, Chr 6, Wayne State University 163, expressed (Mus musculus adult m Q91YN0)      | Q91YN0      |    |       |    |       |    |      |  |  | 3  | 0.93 |      |       |

|                                                                                        |         |              |    |       |  |    |      |  |  |   |      |  |  |    |      |  |  |  |  |        |
|----------------------------------------------------------------------------------------|---------|--------------|----|-------|--|----|------|--|--|---|------|--|--|----|------|--|--|--|--|--------|
| DNA segment, Chr 8, ERATO Doi 457, expressed                                           | Q8K327  | Q8K327       |    |       |  | 1  | 2.76 |  |  |   |      |  |  |    |      |  |  |  |  |        |
| DNA topoisomerase I (EC 5.99.1.2)                                                      | Q04750  | TOP1_MOUSE   | 5  | 1.56  |  | 4  | 0.74 |  |  | 4 | 2.43 |  |  | 6  | 1.26 |  |  |  |  | 21969  |
| DNA topoisomerase III beta-1 (EC 5.99.1.2)                                             | Q9Z321  | TOP3B_MOUSE  |    |       |  | 1  | 1.19 |  |  | 1 | 0.03 |  |  | 2  | 0.99 |  |  |  |  | 21976  |
| DNA-(apurinic or pyrimidinic site) lyase (EC 4.2.99.18) (AP endonuclease 1) (APEX      | P28352  | APEX1_MOUSE  | 6  | 1.27  |  | 4  | 1.81 |  |  |   |      |  |  | 3  | 1.99 |  |  |  |  | 11792  |
| DNA-binding protein inhibitor ID-4                                                     | P41139  | ID4_MOUSE    |    |       |  | 1  | 5.10 |  |  |   |      |  |  |    |      |  |  |  |  | 15904  |
| DNA-binding protein Mel-18 (RING finger protein 110) (Zinc finger protein 144)         | P23798  | MEL18_MOUSE  |    |       |  |    |      |  |  |   |      |  |  | 1  | 0.64 |  |  |  |  | 22658  |
| DNA-binding protein SATB2 (Special AT-rich sequence-binding protein 2)                 | Q8V124  | SATB2_MOUSE  |    |       |  | 1  | 1.69 |  |  |   |      |  |  |    |      |  |  |  |  | 212712 |
| DNA-dependent protein kinase catalytic subunit (EC 2.7.1.37) (DNA-PKcs) (P460)         | P97313  | PRKDC_MOUSE  | 1  | 0.73  |  |    |      |  |  |   |      |  |  |    |      |  |  |  |  | 19090  |
| DNA-directed RNA polymerase I 135 kDa polypeptide (EC 2.7.7.6) (RNA polymerase         | P70700  | RPA2_MOUSE   |    |       |  |    |      |  |  |   |      |  |  | 1  | 1.58 |  |  |  |  | 20017  |
| DNA-directed RNA polymerase II 13.3 kDa polypeptide (EC 2.7.7.6) (RPB11) (RPB14        | O08740  | RPB11_MOUSE  | 1  | 1.75  |  | 2  | 1.74 |  |  | 2 | 0.31 |  |  |    |      |  |  |  |  | 20022  |
| DNA-directed RNA polymerase II 14.5 kDa polypeptide (EC 2.7.7.6) (RPB9) (RPB14         | !P60898 | RPB9_MOUSE   | 2  | 3.01  |  | 1  | 2.45 |  |  | 2 | 0.85 |  |  | 5  | 1.63 |  |  |  |  | 69920  |
| DNA-directed RNA polymerase II 140 kDa polypeptide (EC 2.7.7.6) (RNA polymerase        | Q8CF17  | RPB2_MOUSE   | 6  | 1.50  |  | 5  | 1.76 |  |  | 1 | 0.83 |  |  | 1  | 0.65 |  |  |  |  | 231329 |
| DNA-directed RNA polymerase II 16 kDa polypeptide (EC 2.7.7.6) (RPB4)                  | Q9D7M8  | RPB4_MOUSE   |    |       |  | 2  | 1.93 |  |  |   |      |  |  | 1  | 0.89 |  |  |  |  | 69241  |
| DNA-directed RNA polymerase III 62 kDa polypeptide (EC 2.7.7.6) (RNA polymerase        | Q9D483  | RPC62_MOUSE  |    |       |  | 1  | 7.22 |  |  |   |      |  |  |    |      |  |  |  |  | 74414  |
| DNA-directed RNA polymerases III 12.5 kDa polypeptide (EC 2.7.7.6) (RNA polymera       | Q9CQZ7  | RPC11_MOUSE  |    |       |  | 1  | 1.00 |  |  |   |      |  |  |    |      |  |  |  |  | 67005  |
| DnaJ homolog subfamily A member 1 (Heat shock 40 kDa protein 4) (DnaJ protein hc       | P63037  | DNJA1_MOUSE  | 3  | 1.21  |  | 8  | 2.58 |  |  | 1 | 1.14 |  |  | 4  | 1.70 |  |  |  |  | 15502  |
| DnaJ homolog subfamily A member 2 (mDj3)                                               | Q9QYJ0  | DNJA2_MOUSE  | 6  | 1.55  |  | 4  | 1.44 |  |  | 4 | 1.06 |  |  | 16 | 0.82 |  |  |  |  | 56445  |
| DnaJ homolog subfamily A member 3, mitochondrial precursor (Tumorous imaginal di       | Q99M87  | DNJA3_MOUSE  | 1  | 1.25  |  | 2  | 1.53 |  |  | 1 | 0.47 |  |  | 4  | 4.34 |  |  |  |  | 83945  |
| DnaJ homolog subfamily A member 4 (MmDjA4)                                             | Q9JMC3  | DNJA4_MOUSE  |    |       |  |    |      |  |  |   |      |  |  | 1  | 1.39 |  |  |  |  | 58233  |
| DnaJ homolog subfamily B member 1 (Heat shock 40 kDa protein 1) (Heat shock prot       | Q9QYJ3  | DNJB1_MOUSE  | 3  | 1.71  |  | 6  | 1.11 |  |  | 2 | 1.48 |  |  | 1  | 1.37 |  |  |  |  | 81489  |
| DnaJ homolog subfamily B member 11 precursor                                           | Q99KV1  | DNJB_B_MOUSE | 2  | 1.97  |  | 4  | 2.76 |  |  | 5 | 0.90 |  |  | 4  | 1.17 |  |  |  |  | 67838  |
| DnaJ homolog subfamily B member 4                                                      | Q9D832  | DNJB4_MOUSE  | 1  | 4.12  |  | 1  | 1.97 |  |  | 2 | 1.63 |  |  |    |      |  |  |  |  | 67035  |
| DnaJ homolog subfamily C member 7 (Tetratricopeptide repeat protein 2) (TPR repea      | Q9QYI3  | DNJC7_MOUSE  | 1  | 2.92  |  | 1  | 0.79 |  |  |   |      |  |  |    |      |  |  |  |  | 56354  |
| DOCK180-related Cdc42 guanine nucleotide exchange factor                               | Q5KTP7  | Q5KTP7       | 1  | 1.57  |  | 1  | 3.25 |  |  |   |      |  |  | 3  | 1.28 |  |  |  |  |        |
| Docking protein 1 (p62(dok)) (Downstream of tyrosine kinase 1)                         | P97465  | DOK1_MOUSE   | 1  | 2.77  |  |    |      |  |  |   |      |  |  |    |      |  |  |  |  | 13448  |
| Dolichyl-diphosphooligosaccharide--protein glycosyltransferase 67 kDa subunit precu    | Q91YQ5  | RIB1_MOUSE   | 12 | 1.32  |  | 13 | 1.08 |  |  | 6 | 1.07 |  |  | 4  | 0.85 |  |  |  |  | 103963 |
| Dolichyl-P-Man:Man(7)GlcNAc(2)-PP-dolichyl-alpha-1,6-mannosyltransferase (EC 2.4       | Q8VDB2  | ALG12_MOUSE  |    |       |  |    |      |  |  |   |      |  |  | 1  | 2.50 |  |  |  |  | 223774 |
| Double-stranded RNA-binding protein Staufien homolog                                   | Q9Z108  | STAU_MOUSE   | 2  | 2.50  |  |    |      |  |  | 2 | 0.58 |  |  | 4  | 1.79 |  |  |  |  | 20853  |
| Double-stranded RNA-specific adenosine deaminase (EC 3.5.4.-) (DRADA) (RNA ad          | Q99MU3  | DSRAD_MOUSE  |    |       |  | 1  | 0.48 |  |  |   |      |  |  |    |      |  |  |  |  | 56417  |
| Down syndrome critical region protein 3 homolog (Down syndrome critical region prot    | O35075  | DSCR3_MOUSE  | 1  | 11.96 |  | 3  | 1.24 |  |  | 1 | 0.76 |  |  | 3  | 1.52 |  |  |  |  | 13185  |
| Down-regulator of transcription 1 (Mus musculus adult male liver cDNA, RIKEN full-le   | Q91WV0  | Q91WV0       |    |       |  |    |      |  |  |   |      |  |  | 1  | 1.84 |  |  |  |  |        |
| Drebrin (Developmentally regulated brain protein)                                      | Q9QXS6  | DREB_MOUSE   | 2  | 6.37  |  | 5  | 4.10 |  |  | 3 | 1.00 |  |  | 6  | 1.62 |  |  |  |  | 56320  |
| Drebrin-like protein (SH3 domain-containing protein 7) (Actin-binding protein 1)       | Q62418  | DBNL_MOUSE   | 5  | 1.16  |  | 2  | 1.07 |  |  |   |      |  |  |    |      |  |  |  |  | 13169  |
| Dual specificity mitogen-activated protein kinase kinase 4 (EC 2.7.1.37) (EC 2.7.1.112 | P47809  | MP2K4_MOUSE  | 4  | 2.35  |  | 3  | 1.18 |  |  |   |      |  |  | 5  | 1.62 |  |  |  |  | 26398  |
| Dual specificity protein phosphatase CDC14A (EC 3.1.3.48) (EC 3.1.3.16) (CDC14 ce      | Q6GQTT  | CC14A_MOUSE  |    |       |  |    |      |  |  |   |      |  |  | 1  | 0.97 |  |  |  |  | 229776 |
| Dynactin complex 50 kDa subunit (50 kDa dynein-associated polypeptide) (p50 dynar      | Q99KJ8  | DCTN2_MOUSE  | 2  | 2.01  |  | 1  | 1.61 |  |  |   |      |  |  | 3  | 1.81 |  |  |  |  | 69654  |
| Dynactin-1 (150 kDa dynein-associated polypeptide) (DP-150) (DAP-150) (p150-glu        | O08788  | DYNA_MOUSE   | 12 | 1.63  |  | 5  | 1.01 |  |  | 3 | 1.38 |  |  | 1  | 1.60 |  |  |  |  | 13191  |
| Dynamin 2 (EC 3.6.5.5) (Dynamin UDNM)                                                  | P39054  | DYN2_MOUSE   |    |       |  | 3  | 0.81 |  |  |   |      |  |  |    |      |  |  |  |  | 13430  |
| Dynamin binding protein (Scaffold protein Tuba)                                        | Q6TXD4  | DNMBP_MOUSE  |    |       |  | 1  | 0.14 |  |  |   |      |  |  | 1  | 0.42 |  |  |  |  | 71972  |
| Dynamin-1 (EC 3.6.5.5)                                                                 | P39053  | DYN1_MOUSE   |    |       |  | 3  | 0.72 |  |  |   |      |  |  |    |      |  |  |  |  | 13429  |
| Dynamin-related Protein 1                                                              | Q8K1M6  | Q8K1M6       | 9  | 1.98  |  | 10 | 1.15 |  |  | 2 | 1.99 |  |  | 6  | 1.13 |  |  |  |  |        |
| Dynein heavy chain, cytosolic (DYHC) (Cytoplasmic dynein heavy chain)                  | Q9JHU4  | DYHC_MOUSE   | 24 | 1.59  |  | 24 | 1.23 |  |  | 4 | 1.22 |  |  | 7  | 3.52 |  |  |  |  | 13424  |
| Dynein light chain 1, cytoplasmic (8 kDa dynein light chain) (DLC8) (Protein inhibi    | P63168  | DYL1_MOUSE   | 1  | 1.64  |  |    |      |  |  |   |      |  |  |    |      |  |  |  |  | 56455  |
| Dynein, cytoplasmic, light intermediate chain 1                                        | Q8R1Q8  | Q8R1Q8       |    |       |  |    |      |  |  |   |      |  |  | 1  | 1.07 |  |  |  |  |        |
| Dyrk3 protein                                                                          | Q922Y0  | Q922Y0       |    |       |  |    |      |  |  |   |      |  |  | 1  | 1.17 |  |  |  |  |        |
| Dyskerin (Nucleolar protein NAP57)                                                     | Q9ESX5  | DKC1_MOUSE   | 4  | 1.75  |  | 5  | 1.33 |  |  | 1 | 1.25 |  |  | 1  | 1.34 |  |  |  |  |        |
| Dystrobrevin beta (Beta-dystrobrevin) (DTN-B) (MDTN-B)                                 | O70585  | DTNB_MOUSE   |    |       |  |    |      |  |  |   |      |  |  | 1  | 0.47 |  |  |  |  | 13528  |
| Dystroglycan precursor (Dystrophin-associated glycoprotein 1) [Contains: Alpha-dys     | Q62165  | DAG1_MOUSE   | 2  | 1.11  |  | 2  | 1.75 |  |  |   |      |  |  |    |      |  |  |  |  | 13138  |
| Dystrophia myotonica-containing WD repeat motif protein (DMR-N9 protein)               | Q08274  | DMWD_MOUSE   |    |       |  |    |      |  |  |   |      |  |  | 1  | 1.04 |  |  |  |  | 13401  |
| Dystrophin                                                                             | P11531  | DMD_MOUSE    | 1  | 1.70  |  | 1  | 0.78 |  |  |   |      |  |  |    |      |  |  |  |  | 13405  |
| E2F transcription factor 4 (E2f4 protein)                                              | Q8R0K9  | Q8R0K9       |    |       |  | 1  | 4.16 |  |  |   |      |  |  |    |      |  |  |  |  |        |
| E3 ubiquitin ligase SMURF2                                                             | Q5IRE6  | Q5IRE6       | 1  | 1.35  |  |    |      |  |  | 1 | 0.33 |  |  |    |      |  |  |  |  |        |
| E3 ubiquitin protein ligase URE-B1 (EC 6.3.2.-) (Fragment)                             | Q7TMY8  | UREB1_MOUSE  | 5  | 1.12  |  | 2  | 0.96 |  |  | 2 | 1.88 |  |  |    |      |  |  |  |  | 59026  |
| E3 ubiquitin-protein ligase Nedd-4 (EC 6.3.2.-)                                        | P46935  | NEDD4_MOUSE  | 2  | 2.08  |  | 5  | 1.05 |  |  | 1 | 1.11 |  |  |    |      |  |  |  |  | 17999  |
| Early endosome antigen 1                                                               | Q6DIC2  | Q6DIC2       | 3  | 17.17 |  | 3  | 7.84 |  |  |   |      |  |  |    |      |  |  |  |  |        |
| Early growth response protein 1 (EGR-1) (Krox-24 protein) (ZIF268) (Nerve growth fa    | P08046  | EGR1_MOUSE   | 1  | 5.86  |  | 2  | 4.11 |  |  |   |      |  |  |    |      |  |  |  |  | 13653  |
| Early growth response protein 2 (EGR-2) (Krox-20 protein)                              | P08152  | EGR2_MOUSE   |    |       |  | 2  | 4.16 |  |  |   |      |  |  |    |      |  |  |  |  | 13654  |
| EGF-containing fibulin-like extracellular matrix protein 2 precursor (Fibulin-4) (FIBL | Q9VWJ9  | FBLN4_MOUSE  | 1  | 7.54  |  | 9  | 5.32 |  |  | 1 | 1.04 |  |  | 18 | 0.86 |  |  |  |  | 58859  |
| EH-domain containing protein 4 (mPAST2)                                                | Q9EQP2  | EHD4_MOUSE   | 4  | 4.70  |  | 4  | 1.32 |  |  | 1 | 2.28 |  |  | 4  | 1.94 |  |  |  |  | 98878  |
| EIB-55kDa associated protein 5                                                         | Q8VDM6  | Q8VDM6       | 6  | 1.20  |  | 5  | 1.17 |  |  |   |      |  |  | 4  | 0.85 |  |  |  |  |        |
| Electron transfer flavoprotein-ubiquinone oxidoreductase, mitochondrial precursor (EC  | Q921G7  | ETFD_MOUSE   | 9  | 1.32  |  | 6  | 3.34 |  |  | 4 | 0.81 |  |  | 7  | 0.67 |  |  |  |  | 66841  |

|                                                                                              |             |    |      |    |       |    |      |    |       |        |
|----------------------------------------------------------------------------------------------|-------------|----|------|----|-------|----|------|----|-------|--------|
| Elongation factor 1-alpha 1 (EF-1-alpha-1) (Elongation factor 1 A-1) (eEF1A-1) (Elong P10126 | EF1A1_MOUSE | 16 | 1.48 | 20 | 1.26  | 2  | 2.83 | 8  | 1.91  | 13627  |
| Elongation factor 1-beta (EF-1-beta)                                                         | EF1B_MOUSE  | 1  | 1.39 |    |       |    |      |    |       | 55949  |
| Elongation factor 1-gamma (EF-1-gamma) (eEF-1B gamma)                                        | Q9D8N0      |    |      |    |       |    |      | 1  | 4.07  | 67160  |
| Elongation factor 2 (EF-2)                                                                   | P58252      | 34 | 1.62 | 64 | 1.10  | 10 | 2.53 | 16 | 1.63  | 13629  |
| Elongation factor G 1, mitochondrial precursor (mEF-G 1) (Elongation factor G1)              | Q8K0D5      |    |      | 1  | 1.14  |    |      | 1  | 1.63  | 28030  |
| Elongation factor Ts, mitochondrial precursor (EF-Ts) (EF-TsMt)                              | Q9CZR8      | 1  | 4.52 | 4  | 1.46  |    |      |    |       | 66399  |
| Embryonic growth-associated                                                                  | Q6PHQ8      |    |      |    |       |    |      | 2  | 1.13  |        |
| EMILIN 1 precursor (Elastin microfibril interface-located protein 1) (Elastin microfibril i  | EMIL1_MOUSE | 1  | 4.24 | 5  | 2.47  | 1  | 0.32 | 11 | 1.13  | 100952 |
| Enabled protein homolog (NPC derived proline-rich protein 1) (NDPP-1)                        | ENAH_MOUSE  | 2  | 1.57 | 1  | 0.75  |    |      |    |       | 13800  |
| Endonuclease VIII-like 3 (Nei-like 3) (DNA glycosylase FPG2)                                 | Q8K203      |    |      | 1  | 2.36  |    |      |    |       | 234258 |
| Endoplasmic reticulum protein ERp29 precursor                                                | P57759      | 4  | 1.85 | 3  | 1.31  |    |      | 1  | 1.17  | 67397  |
| Endoplasmic precursor (Endoplasmic reticulum protein 99) (94 kDa glucose-regulatec           | P08113      | 2  | 1.70 | 3  | 1.13  |    |      |    |       | 22027  |
| Endoribonuclease Dicer (EC 3.1.26.-) (Double-strand-specific ribonuclease mDCR-1)            | Q8R418      |    |      | 2  | 0.37  |    |      | 1  | 0.65  | 192119 |
| Enhancer of rudimentary homolog                                                              | P84089      | 4  | 2.12 | 1  | 2.29  | 4  | 1.41 | 5  | 0.93  | 13877  |
| Enhancer of zeste homolog 2 (ENX-1)                                                          | Q61188      |    |      |    |       |    |      | 2  | 2.84  | 14056  |
| Enigma homolog (Enigma-like PDZ and LIM domains protein)                                     | Q8C151      | 1  | 2.52 | 11 | 2.72  | 1  | 1.48 | 8  | 1.27  | 56376  |
| Envelope polyprotein                                                                         | Q811M8      | 1  | 3.26 | 6  | 3.37  |    |      | 6  | 0.95  |        |
| Eosinophil peroxidase precursor (EC 1.11.1.7) (EPO)                                          | P49290      |    |      |    |       |    |      | 1  | 1.29  | 13861  |
| Ephrin type-A receptor 2 precursor (EC 2.7.1.112) (Tyrosine-protein kinase receptor E        | EPHA2_MOUSE | 3  | 1.38 | 5  | 2.03  | 2  | 1.17 | 3  | 1.36  | 13836  |
| Ephrin type-A receptor 8 precursor (EC 2.7.1.112) (Tyrosine-protein kinase receptor E        | EPHA8_MOUSE |    |      |    |       |    |      | 1  | 0.19  | 13842  |
| Ephrin-A1 precursor (EPH-related receptor tyrosine kinase ligand 1) (LERK-1) (Immer          | EFNA1_MOUSE |    |      | 1  | 0.75  |    |      |    |       | 13636  |
| Ephrin-B1 precursor (EPH-related receptor tyrosine kinase ligand 2) (LERK-2) (ELK i          | EFNB1_MOUSE | 2  | 1.43 | 3  | 2.51  | 3  | 0.89 | 3  | 1.44  | 13641  |
| Epidermal growth factor receptor substrate 15-like 1 (Eps15-related protein) (Eps15R)        | Q60902      | 1  | 3.12 |    |       |    |      | 1  | 1.65  | 13859  |
| Epididymal secretory protein E1 precursor (Niemann Pick type C2 protein homolog) (r          | Q9Z0J0      | 7  | 1.61 | 13 | 1.85  | 7  | 1.20 | 7  | 1.08  | 67963  |
| Epididymal-specific lipocalin 12 precursor                                                   | Q6JVL5      |    |      |    |       |    |      | 1  | 0.59  |        |
| Epididymis-specific alpha-mannosidase precursor (EC 3.2.1.24) (Mannosidase alpha             | O54782      | 8  | 1.16 | 7  | 1.07  |    |      | 1  | 0.28  | 17160  |
| EPM2A-interacting protein 1 (Laforin-interacting protein)                                    | Q8VEH5      | 2  | 3.51 | 2  | 1.82  |    |      | 3  | 1.15  | 77781  |
| Equilibrative nucleoside transporter 1 (Equilibrative nitrobenzylmercaptapurine ribosid      | Q9JIM1      | 9  | 1.25 | 5  | 1.23  |    |      | 9  | 1.83  | 63959  |
| Ercc5 protein (Fragment)                                                                     | Q6P9Q0      |    |      | 1  | 0.30  |    |      |    |       |        |
| ERO1-like protein alpha precursor (EC 1.8.4.-) (ERO1-Lalpha) (Oxidoreductin 1-lalph          | Q8R180      | 1  | 2.20 | 2  | 4.19  |    |      | 7  | 1.58  | 50527  |
| ERO1-like protein beta precursor (EC 1.8.4.-) (ERO1-Lbeta) (Oxidoreductin 1-lbeta)           | IQ8R2E9     |    |      | 2  | 5.64  |    |      |    |       | 67475  |
| ER-resident protein ERdj5                                                                    | Q8CH78      | 3  | 1.87 | 6  | 1.52  | 6  | 0.99 | 9  | 1.02  |        |
| Erythroblast macrophage protein EMP                                                          | Q9JK49      |    |      | 1  | 0.93  |    |      | 2  | 0.67  |        |
| ES1 protein homolog, mitochondrial precursor                                                 | Q9D172      | 4  | 2.28 | 4  | 3.25  | 3  | 1.46 | 4  | 1.23  | 28295  |
| Estradiol 17-beta-dehydrogenase 8 (EC 1.1.1.62) (17-beta-HSD 8) (17-beta-hydroxys            | P50171      | 2  | 1.55 | 2  | 0.92  | 2  | 0.99 | 1  | 1.46  | 14979  |
| Estrogen receptor (ER) (Estradiol receptor) (ER-alpha)                                       | P19785      | 1  | 1.01 |    |       |    |      |    |       | 13982  |
| Eukaryotic initiation factor 4A-I (eIF4A-I) (eIF-4A-I)                                       | P60843      | 3  | 3.30 | 7  | 14.86 | 3  | 3.87 | 9  | 1.61  | 13681  |
| Eukaryotic initiation factor 4A-II (eIF4A-II) (eIF-4A-II)                                    | P10630      | 2  | 1.78 |    |       |    |      | 2  | 1.70  | 13682  |
| Eukaryotic peptide chain release factor subunit 1 (eRF1) (Eukaryotic release factor 1)       | Q8BWW3      | 2  | 2.30 | 1  | 0.80  |    |      |    |       | 225363 |
| Eukaryotic translation initiation factor 1 (eIF1) (Protein translation factor SUI1 homolo    | P48024      | 3  | 1.47 | 5  | 1.34  | 6  | 1.97 | 2  | 1.36  | 20918  |
| Eukaryotic translation initiation factor 2 subunit 1 (Eukaryotic translation initiation fact | Q6ZWX6      | 1  | 0.46 | 2  | 1.07  |    |      |    |       |        |
| Eukaryotic translation initiation factor 2 subunit 2 (Eukaryotic translation initiation fact | Q99L45      | 4  | 2.57 | 9  | 1.88  | 5  | 1.27 | 6  | 1.41  | 67204  |
| Eukaryotic translation initiation factor 2 subunit 3, X-linked (Eukaryotic translation initi | Q9Z0N1      | 2  | 1.41 | 1  | 0.77  |    |      |    |       | 26905  |
| Eukaryotic translation initiation factor 2B, subunit 5 epsilon                               | Q8CHW4      | 6  | 1.50 | 5  | 2.10  | 3  | 1.38 | 4  | 1.33  |        |
| Eukaryotic translation initiation factor 3 subunit 10 (eIF-3 theta) (eIF3 p167) (eIF3 p18    | P23116      | 7  | 1.33 | 3  | 0.88  | 4  | 1.74 | 3  | 1.03  | 13669  |
| Eukaryotic translation initiation factor 3 subunit 2 (eIF-3 beta) (eIF3 p36) (eIF3i) (TGF    | Q9QZD9      | 4  | 1.16 | 5  | 1.03  | 2  | 1.08 | 5  | 0.85  | 54709  |
| Eukaryotic translation initiation factor 3 subunit 3 (eIF-3 gamma) (eIF3 p40 subunit) (e     | Q91WK2      | 2  | 1.30 |    |       |    |      |    |       | 68135  |
| Eukaryotic translation initiation factor 3 subunit 4 (eIF-3 delta) (eIF3 p44) (eIF-3 RNA     | Q9Z1D1      | 1  | 1.41 | 3  | 0.96  |    |      |    |       | 53356  |
| Eukaryotic translation initiation factor 3 subunit 5 (eIF-3 epsilon) (eIF3 p47 subunit) (e   | Q9DCH4      | 4  | 0.99 | 1  | 0.94  | 1  | 0.88 |    |       | 66085  |
| Eukaryotic translation initiation factor 3 subunit 6 (eIF-3 p48) (eIF3e) (Mammary tumo       | P60229      | 4  | 1.82 | 5  | 0.93  | 2  | 2.32 | 10 | 1.27  | 16341  |
| Eukaryotic translation initiation factor 3, subunit 6 interacting protein (Tyrosine-rich he  | Q8QZY1      | 2  | 1.59 |    |       |    |      |    |       |        |
| Eukaryotic translation initiation factor 3, subunit 8                                        | Q8R1B4      | 12 | 1.30 | 7  | 0.82  | 2  | 1.48 | 4  | 1.39  |        |
| Eukaryotic translation initiation factor 4 gamma 3 (eIF-4-gamma 3) (eIF-4G 3) (eIF4G         | Q80X13      |    |      | 3  | 0.90  |    |      | 1  | 0.46  | 230861 |
| Eukaryotic translation initiation factor 6 (eIF-6) (B4 integrin interactor) (CAB) (p27(BB    | O55135      | 6  | 1.88 | 5  | 1.61  | 5  | 1.53 | 4  | 1.39  | 16418  |
| Exo1 protein (Mus musculus 10 days neonate skin cDNA, RIKEN full-length enriched             | Q9Z3A5      |    |      |    |       |    |      | 1  | 0.45  |        |
| Exoc8 protein                                                                                | Q6PGF7      |    |      |    |       |    |      | 1  | 18.04 |        |
| Exocyst complex component Sec5                                                               | Q9D4H1      | 1  | 0.05 |    |       |    |      |    |       | 66482  |
| Exosome complex exonuclease RRP40 (EC 3.1.13.-) (Ribosomal RNA processing pr                 | Q7TQK4      | 1  | 2.06 |    |       | 2  | 1.21 | 1  | 1.43  | 66362  |
| Exosome complex exonuclease RRP45 (EC 3.1.13.-) (Exosome component 9) (Polyn                 | Q9JHI7      |    |      |    |       | 2  | 0.83 | 2  | 1.14  | 50911  |
| Exosome complex exonuclease RRP46 (EC 3.1.13.-) (Ribosomal RNA processing pr                 | Q9CRA8      |    |      | 1  | 3.75  |    |      | 2  | 0.47  | 27998  |
| Exostosin-2 (EC 2.4.1.224) (EC 2.4.1.225) (Glucuronosyl-N-acetylglucosaminyl-prote           | P70428      |    |      | 1  | 1.79  | 1  | 1.74 | 2  | 0.91  | 14043  |

|                                                                                                               |          |             |     |      |     |       |    |      |    |      |        |
|---------------------------------------------------------------------------------------------------------------|----------|-------------|-----|------|-----|-------|----|------|----|------|--------|
| Exportin 7 (Ran-binding protein 16)                                                                           | Q9EPK7   | XPO7_MOUSE  | 11  | 1.62 | 3   | 1.33  |    |      | 1  | 2.05 | 65246  |
| Exportin T (tRNA exportin) (Exportin(tRNA)) (Fragment)                                                        | Q9CRT8   | XPOT_MOUSE  | 2   | 1.40 | 2   | 0.93  | 1  | 1.18 | 2  | 1.75 | 73192  |
| Expressed sequence AA536743                                                                                   | Q8K2J7   | Q8K2J7      | 1   | 3.37 |     |       |    |      |    |      |        |
| Expressed sequence AA959742 (Mus musculus 0 day neonate eyeball cDNA, RIKEN)                                  | Q922Q8   | Q922Q8      | 11  | 1.26 | 5   | 1.82  | 3  | 0.98 |    |      |        |
| Expressed sequence AI429152                                                                                   | Q8K224   | Q8K224      | 4   | 1.80 | 4   | 1.98  | 4  | 1.51 | 3  | 2.63 |        |
| Extracellular matrix protein 1 precursor (Secretory component p85)                                            | Q61508   | ECM1_MOUSE  |     |      | 1   | 3.35  |    |      | 1  | 1.23 | 13601  |
| Extracellular superoxide dismutase [Cu-Zn] precursor (EC 1.15.1.1) (EC-SOD)                                   | O09164   | SODE_MOUSE  | 1   | 0.83 | 1   | 5.66  |    |      |    |      | 20657  |
| F-actin capping protein alpha-1 subunit (CapZ alpha-1)                                                        | P47753   | CAZA1_MOUSE |     |      | 1   | 2.50  |    |      |    |      | 12340  |
| F-actin capping protein alpha-2 subunit (CapZ alpha-2)                                                        | P47754   | CAZA2_MOUSE |     |      | 1   | 1.77  |    |      |    |      | 12343  |
| F-actin capping protein beta subunit (CapZ beta)                                                              | P47757   | CAPZB_MOUSE | 5   | 1.40 | 1   | 2.44  | 1  | 1.26 |    |      | 12345  |
| Fancc2 protein (Fragment)                                                                                     | Q80V62   | Q80V62      | 1   | 7.02 |     |       |    |      |    |      |        |
| Fanconi anemia group A protein homolog (FACA protein)                                                         | Q9JL70   | FANCA_MOUSE |     |      | 1   | 0.85  |    |      |    |      | 14087  |
| Farnesyl pyrophosphate synthetase (FPP synthetase) (FPS) (Farnesyl diphosphate synthetase)                    | Q920E5   | FPPS_MOUSE  | 9   | 1.92 | 8   | 1.99  | 4  | 1.82 | 7  | 1.30 |        |
| Farp1 protein (Fragment)                                                                                      | Q8K2R0   | Q8K2R0      | 5   | 1.24 | 6   | 1.14  | 3  | 0.85 | 6  | 1.41 |        |
| Fat 1 cadherin (Fragment)                                                                                     | Q9QXA3   | Q9QXA3      | 3   | 1.65 | 2   | 3.04  |    |      | 2  | 0.80 |        |
| Fatty acid synthase (EC 2.3.1.85) [Includes: [Acyl-carrier-protein] S-acetyltransferase]                      | P19096   | FAS_MOUSE   | 32  | 1.71 | 23  | 1.00  | 16 | 2.12 | 23 | 1.55 | 14104  |
| Fatty acid transport protein 4 (Solute carrier family 27 (Fatty acid transporter), member 4)                  | Q91VE0   | Q91VE0      |     |      | 4   | 2.00  |    |      | 7  | 3.05 |        |
| Fatty acid-binding protein, epidermal (E-FABP) (Psoriasis-associated fatty acid-binding protein)              | Q05816   | FABPE_MOUSE | 15  | 2.57 | 13  | 2.32  | 14 | 2.22 | 12 | 1.78 | 16592  |
| Fatty aldehyde dehydrogenase-like                                                                             | Q80VQ0   | Q80VQ0      | 2   | 1.22 | 1   | 0.15  |    |      |    |      |        |
| F-box only protein 18 (EC 3.6.1.-) (F-box DNA helicase 1)                                                     | Q8K219   | FBX18_MOUSE |     |      | 1   | 1.54  |    |      |    |      | 50755  |
| F-box only protein 30                                                                                         | Q8BJL1   | FBX30_MOUSE | 2   | 3.03 | 2   | 0.87  | 1  | 1.73 |    |      | 71865  |
| F-box only protein 37 (F-box/LRR-repeat protein 15)                                                           | Q91W61   | FBX37_MOUSE | 3   | 1.78 | 3   | 1.20  | 2  | 2.08 | 4  | 2.90 | 68431  |
| F-box only protein 4                                                                                          | Q8CHQ0   | FBX4_MOUSE  | 1   | 0.60 |     |       |    |      |    |      |        |
| F-box only protein 6 (F-box only protein 6b)                                                                  | Q9QZN4   | FBX6_MOUSE  | 2   | 4.46 | 5   | 1.80  | 3  | 2.28 | 2  | 3.66 | 50762  |
| F-box/LRR-repeat protein 11 (F-box and leucine-rich repeat protein 11) (Fragment)                             | P59997   | FXL11_MOUSE |     |      |     |       |    |      | 1  | 1.39 | 225876 |
| F-box/LRR-repeat protein 17 (F-box and leucine-rich repeat protein 17) (F-box only protein 17)                | Q9QZN1   | FXL17_MOUSE |     |      |     |       |    |      | 1  | 0.79 | 50758  |
| F-box/LRR-repeat protein 20 (F-box and leucine-rich repeat protein 20) (F-box/LRR-repeat protein 20)          | Q9CZV8   | FXL20_MOUSE |     |      | 1   | 0.53  |    |      |    |      | 72194  |
| F-box/WD-repeat protein 4 (F-box and WD-40 domain protein 4) (Hagoromo protein)                               | Q9JMJ2   | FBXW4_MOUSE |     |      |     |       |    |      | 1  | 0.08 | 30838  |
| F-box/WD-repeat protein 8 (F-box and WD-40 domain protein 8)                                                  | Q8BIA4   | FBXW8_MOUSE | 1   | 0.69 |     |       |    |      |    |      | 231672 |
| F-box-like/WD-repeat protein TBL1X (Transducin beta-like 1X protein)                                          | Q9QXE7   | TBLX_MOUSE  | 6   | 0.95 | 6   | 0.96  | 2  | 0.79 | 1  | 0.52 | 21372  |
| F-box-like/WD-repeat protein TBLR1 (Nuclear receptor corepressor/HDAC3 complex)                               | Q8BHJ5   | TBL1R_MOUSE | 2   | 2.17 | 3   | 1.19  | 3  | 0.87 |    |      | 81004  |
| Fbxo7 protein                                                                                                 | Q8K0A5   | Q8K0A5      | 1   | 1.82 |     |       |    |      |    |      |        |
| Fbxw17 protein                                                                                                | Q8CFE8   | Q8CFE8      | 1   | 1.31 |     |       |    |      |    |      |        |
| Fca/m receptor                                                                                                | Q9EQ77   | Q9EQ77      |     |      |     |       |    |      | 1  | 0.54 |        |
| FERM, RhoGEF and pleckstrin domain protein 2                                                                  | Q91VS8   | Q91VS8      | 6   | 1.40 | 4   | 1.21  |    |      | 5  | 0.81 |        |
| Ferrochelatase, mitochondrial precursor (EC 4.99.1.1) (Protoheme ferro-lyase) (Hemerythrin)                   | P22315   | HEMH_MOUSE  | 1   | 1.94 | 3   | 1.79  | 2  | 0.85 | 2  | 1.17 | 14151  |
| Fibrillin 1 precursor                                                                                         | Q61554   | FBN1_MOUSE  |     |      |     |       |    |      | 1  | 1.87 | 14118  |
| Fibrillin 2 precursor                                                                                         | Q61555   | FBN2_MOUSE  |     |      | 1   | 1.00  |    |      | 2  | 0.33 | 14119  |
| Fibroblast growth factor receptor 2 precursor (EC 2.7.1.112) (FGFR-2) (Keratinocyte growth factor receptor 2) | P21803   | FGFR2_MOUSE | 2   | 1.10 |     |       |    |      |    |      | 14183  |
| Fibronectin precursor (FN)                                                                                    | P11276   | FINC_MOUSE  | 13  | 2.12 | 23  | 10.12 | 4  | 0.75 | 31 | 1.13 | 14268  |
| Fibronectin type III domain containing protein 3a                                                             | Q8BX90   | FNDC3_MOUSE |     |      |     |       |    |      | 1  | 0.28 | 319448 |
| Fibulin-1 precursor (Basement-membrane protein 90) (BM-90)                                                    | Q08879   | FBLN1_MOUSE |     |      | 1   | 0.50  |    |      | 1  | 1.06 | 14114  |
| Fibulin-2 precursor                                                                                           | P37889   | FBLN2_MOUSE | 21  | 3.02 | 45  | 4.54  | 27 | 1.17 | 92 | 1.19 | 14115  |
| Filamin A (Alpha-filamin) (Filamin 1) (Endothelial actin-binding protein) (Actin-binding protein)             | Q8BTM8   | FLNA_MOUSE  | 122 | 1.45 | 114 | 5.37  | 70 | 1.42 | 73 | 5.24 | 192176 |
| Filamin B (FLN-B) (Beta-filamin) (Actin-binding like protein) (ABP-280-like protein)                          | Q80X90   | FLNB_MOUSE  | 76  | 1.52 | 73  | 1.21  | 29 | 1.55 | 30 | 1.38 | 286940 |
| FK506 binding protein 10 precursor (EC 5.2.1.8) (Peptidyl-prolyl cis-trans isomerase)                         | Q61576   | FKB10_MOUSE | 11  | 1.38 | 6   | 1.45  | 1  | 1.92 |    |      | 14230  |
| FK506 binding protein 14 precursor (EC 5.2.1.8) (Peptidyl-prolyl cis-trans isomerase)                         | P59024   | FKB14_MOUSE | 7   | 1.80 | 6   | 2.09  | 1  | 0.88 |    |      | 231997 |
| FK506 binding protein 9 precursor (EC 5.2.1.8) (Peptidyl-prolyl cis-trans isomerase) (FKBP9)                  | I Q9Z247 | FKBP9_MOUSE | 2   | 1.24 | 2   | 1.03  | 1  | 0.81 |    |      | 27055  |
| FK506-binding protein 1A (EC 5.2.1.8) (Peptidyl-prolyl cis-trans isomerase) (PPIase) (FKBP1A)                 | P26883   | FKB1A_MOUSE | 5   | 2.35 | 4   | 1.68  | 4  | 2.65 | 1  | 2.13 | 14225  |
| FK506-binding protein 2 precursor (EC 5.2.1.8) (Peptidyl-prolyl cis-trans isomerase) (FKBP2)                  | I P45878 | FKBP2_MOUSE | 3   | 1.09 | 3   | 0.97  | 1  | 1.70 | 2  | 0.92 | 14227  |
| FK506-binding protein 3 (EC 5.2.1.8) (Peptidyl-prolyl cis-trans isomerase) (PPIase) (FKBP3)                   | R Q62446 | FKBP3_MOUSE | 1   | 1.58 | 3   | 1.03  |    |      |    |      | 30795  |
| FK506-binding protein 4 (EC 5.2.1.8) (Peptidyl-prolyl cis-trans isomerase) (PPIase) (FKBP4)                   | R P30416 | FKBP4_MOUSE | 15  | 1.52 | 15  | 1.07  | 9  | 1.70 | 14 | 1.54 | 14228  |
| FK506-binding protein 5 (EC 5.2.1.8) (Peptidyl-prolyl cis-trans isomerase) (PPIase) (FKBP5)                   | R Q64378 | FKBP5_MOUSE |     |      | 2   | 0.40  |    |      | 3  | 0.74 | 14229  |
| FK506-binding protein 7 precursor (EC 5.2.1.8) (Peptidyl-prolyl cis-trans isomerase) (FKBP7)                  | I O54998 | FKBP7_MOUSE | 2   | 1.16 | 1   | 1.25  |    |      |    |      | 14231  |
| FL10 (Rqcd1 protein) (Rcd1 (Required for cell differentiation) homolog 1) (Mus musculus)                      | Q9JKY0   | Q9JKY0      | 2   | 1.62 | 1   | 1.97  |    |      | 2  | 1.58 |        |
| FLASH                                                                                                         | Q9WUF3   | Q9WUF3      |     |      |     |       |    |      | 1  | 0.30 |        |
| Flightless I protein homolog                                                                                  | Q9JJ28   | FLII_MOUSE  | 1   | 0.95 | 3   | 1.45  | 2  | 1.43 | 2  | 1.01 |        |
| FLN29 gene product                                                                                            | Q8CF18   | Q8CF18      |     |      |     |       | 1  | 0.85 |    |      |        |
| Flncl protein (Fragment)                                                                                      | Q6PAI6   | Q6PAI6      | 8   | 1.29 | 6   | 0.88  | 6  | 1.26 | 3  | 0.63 |        |
| Flotillin-1                                                                                                   | O08917   | FLOT1_MOUSE | 6   | 1.60 | 7   | 1.52  | 2  | 1.22 | 4  | 1.16 | 14251  |
| Flt3-interacting zinc finger protein 1                                                                        | Q9WJT4   | FIZ1_MOUSE  |     |      | 1   | 1.88  |    |      | 1  | 1.38 |        |

|                                                                                            |         |              |    |       |    |       |    |      |   |      |       |        |  |
|--------------------------------------------------------------------------------------------|---------|--------------|----|-------|----|-------|----|------|---|------|-------|--------|--|
| Fmn12 protein (Fragment)                                                                   | Q80VH6  | Q80VH6       | 1  | 0.85  |    |       |    |      |   |      |       |        |  |
| Follistatin precursor (FS) (Activin-binding protein)                                       | P47931  | FST_MOUSE    | 2  | 1.16  | 8  | 4.28  |    |      | 8 | 1.05 | 14313 |        |  |
| Follistatin-related protein 1 precursor (Follistatin-like 1) (TGF-beta-inducible protein T | Q62356  | FSTL1_MOUSE  |    |       | 7  | 3.30  | 3  | 1.32 | 3 | 2.02 | 14314 |        |  |
| Forkhead box protein K1 (Myocyte nuclear factor) (MNF)                                     | P42128  | FO XK1_MOUSE |    |       | 1  | 2.00  |    |      |   |      | 17425 |        |  |
| Formin binding protein 30                                                                  | Q9JHC1  | Q9JHC1       | 1  | 2.14  | 1  | 0.90  |    |      |   | 4    | 1.11  |        |  |
| Fragile X mental retardation syndrome related protein 1 homolog                            | Q61584  | FXR1_MOUSE   |    |       |    |       | 1  | 1.34 |   |      | 14359 |        |  |
| FRG1 protein                                                                               | P97376  | FRG1_MOUSE   | 2  | 1.47  | 2  | 1.78  |    |      |   |      | 14300 |        |  |
| Frizzled 2 precursor (Frizzled-2) (Fz-2) (mFz2) (mFz10)                                    | Q9JIP6  | FZD2_MOUSE   | 7  | 1.51  | 5  | 1.11  |    |      |   | 6    | 0.68  | 57265  |  |
| Frizzled 6 precursor (Frizzled-6) (Fz-6) (mFz6)                                            | Q61089  | FZD6_MOUSE   |    |       |    |       |    |      |   | 1    | 1.31  | 14368  |  |
| Frizzled 8 precursor (Frizzled-8) (Fz-8) (mFz8)                                            | Q61091  | FZD8_MOUSE   | 1  | 1.57  |    |       | 1  | 0.59 |   |      | 14370 |        |  |
| Fscn1 protein                                                                              | Q7TN32  | Q7TN32       | 3  | 1.77  | 4  | 1.68  | 3  | 1.17 |   | 2    | 0.91  |        |  |
| Furin precursor (EC 3.4.21.75) (Paired basic amino acid residue cleaving enzyme) (P        | P23188  | FURIN_MOUSE  |    |       | 1  | 3.40  |    |      |   | 1    | 0.97  | 18550  |  |
| FYVE and coiled-coil domain containing 1                                                   | Q8VDC1  | Q8VDC1       | 1  | 1.78  |    |       |    |      |   | 1    | 4.88  |        |  |
| FYVE, RhoGEF and PH domain containing protein 2                                            | Q8BY35  | FGD2_MOUSE   |    |       |    |       | 1  | 2.63 |   |      |       |        |  |
| FYVE, RhoGEF and PH domain containing protein 3                                            | O88842  | FGD3_MOUSE   |    |       |    |       |    |      |   | 1    | 0.72  |        |  |
| G protein alpha i1 subunit (Fragment)                                                      | Q61018  | Q61018       | 1  | 0.52  | 1  | 0.00  |    |      |   |      |       |        |  |
| G protein-coupled receptor GPR75 (G protein-coupled receptor 75)                           | Q6X632  | Q6X632       |    |       |    |       |    |      |   | 1    | 0.21  |        |  |
| G1/S-specific cyclin D1                                                                    | P25322  | CCND1_MOUSE  | 1  | 3.34  | 2  | 0.85  | 2  | 3.18 |   | 3    | 1.82  | 12443  |  |
| G1/S-specific cyclin D2                                                                    | P30280  | CCND2_MOUSE  |    |       | 1  | 0.08  | 1  | 2.17 |   |      |       | 12444  |  |
| Galectin-1 (Beta-galactoside-binding lectin L-14-I) (Lactose-binding lectin 1) (S-Lac le   | P16045  | LEG1_MOUSE   | 46 | 1.94  | 37 | 1.81  | 19 | 1.37 |   | 21   | 1.49  | 16852  |  |
| Galectin-8 (LGALS-8)                                                                       | Q9JL15  | LEG8_MOUSE   |    |       |    |       | 2  | 5.86 |   |      |       | 56048  |  |
| Galectin-9                                                                                 | O08573  | LEG9_MOUSE   | 6  | 1.61  | 2  | 1.30  |    |      |   |      |       | 16859  |  |
| Gamma-tubulin complex component 2 (GCP-2)                                                  | Q921G8  | GCP2_MOUSE   | 2  | 1.71  | 2  | 1.07  |    |      |   | 3    | 1.40  | 74237  |  |
| GDNF family receptor alpha 2 precursor (GFR-alpha 2) (Neurturin receptor alpha) (N         | O08842  | GFRA2_MOUSE  | 1  | 12.62 | 5  | 3.19  | 1  | 0.83 |   | 6    | 0.64  | 14586  |  |
| GDP-fucose protein O-fucosyltransferase 1 precursor (EC 2.4.1.221) (Peptide-O-fuco         | Q91ZW2  | OFUT1_MOUSE  | 2  | 0.33  |    |       |    |      |   |      |       | 140484 |  |
| GDP-mannose 4, 6-dehydratase (OTTMUSP0000000653)                                           | Q8K0C9  | Q8K0C9       | 3  | 1.76  | 4  | 1.34  | 1  | 1.66 |   |      |       |        |  |
| GDP-mannose pyrophosphorylase A                                                            | Q922H4  | Q922H4       | 4  | 1.51  | 1  | 0.93  |    |      |   | 1    | 1.68  |        |  |
| Gelsolin precursor (Actin-depolymerizing factor) (ADF) (Brevin)                            | P13020  | GELS_MOUSE   | 6  | 2.22  | 3  | 1.99  | 1  | 1.46 |   | 3    | 1.13  | 227753 |  |
| Gem-associated protein 5 (Gemin5)                                                          | Q8BX17  | GEMI5_MOUSE  | 2  | 1.08  | 5  | 0.99  |    |      |   | 1    | 1.65  | 216766 |  |
| Gene model 1012                                                                            | Q80WT4  | Q80WT4       |    |       |    |       |    |      |   | 1    | 1.05  |        |  |
| Gene model 672                                                                             | Q6PEE2  | Q6PEE2       |    |       |    |       | 2  | 1.04 |   | 3    | 1.06  |        |  |
| Gene model 83                                                                              | Q6PAC3  | Q6PAC3       | 3  | 2.04  |    |       |    |      |   |      |       |        |  |
| Gene trap ankyrin repeat containing protein                                                | Q99NH0  | Q99NH0       |    |       | 1  | 1.02  |    |      |   |      |       |        |  |
| General transcription factor 3C polypeptide 1 (Transcription factor IIIC-alpha subunit)    | Q8K284  | TF3C1_MOUSE  |    |       |    |       |    |      |   | 1    | 1.90  | 233863 |  |
| General transcription factor 3C polypeptide 2 (Transcription factor IIIC-beta subunit) (   | Q8BL74  | TF3C2_MOUSE  | 3  | 3.79  |    |       |    |      |   |      |       | 71752  |  |
| General transcription factor 3C polypeptide 4 (EC 2.3.1.48) (Transcription factor IIIC-c   | Q8BMQ2  | TF3C4_MOUSE  |    |       | 1  | 0.72  |    |      |   |      |       | 269252 |  |
| General transcription factor 3C polypeptide 5 (Transcription factor IIIC-epsilon subunit   | Q8R2T8  | TF3C5_MOUSE  |    |       | 1  | 1.35  | 1  | 1.03 |   | 1    | 0.57  | 70239  |  |
| General transcription factor II-I (GTFII-I) (TFII-I) (Bruton tyrosine kinase-associated pr | Q9ESZ8  | GTF2I_MOUSE  |    |       | 1  | 2.02  |    |      |   |      |       |        |  |
| GGA-binding partner                                                                        | Q9D8L5  | GGABP_MOUSE  | 2  | 0.70  | 1  | 0.46  |    |      |   |      |       |        |  |
| Glioma pathogenesis-related protein 1 precursor (GliPR 1)                                  | Q9CWWG1 | GLIP1_MOUSE  | 1  | 2.30  | 3  | 17.14 | 4  | 0.99 |   | 6    | 0.91  |        |  |
| Glomulin (FKBP-associated protein) (FK506-binding protein-associated protein) (FAP         | Q8BZM1  | GLMN_MOUSE   | 5  | 1.54  | 3  | 1.12  |    |      |   | 1    | 1.38  | 170823 |  |
| Glucocorticoid receptor (GR)                                                               | P06537  | GCR_MOUSE    |    |       | 1  | 0.98  |    |      |   |      |       | 14815  |  |
| Glucocorticoid receptor DNA binding factor 1 (Fragment)                                    | Q91YM2  | GRLF1_MOUSE  | 3  | 2.23  | 2  | 10.62 |    |      |   |      |       |        |  |
| Glucosamine 6-phosphate N-acetyltransferase (EC 2.3.1.4) (Phosphoglucosamine tra           | Q9JK38  | GNA1_MOUSE   | 2  | 2.36  | 1  | 0.33  |    |      |   |      |       | 54342  |  |
| Glucosamine-6-phosphate isomerase (EC 3.5.99.6) (Glucosamine-6-phosphate deam              | O88958  | GNPI_MOUSE   |    |       | 1  | 1.24  |    |      |   |      |       | 26384  |  |
| Glucosamine--fructose-6-phosphate aminotransferase [isomerizing] 1 (EC 2.6.1.16) (         | P47856  | GFPT1_MOUSE  | 11 | 1.71  | 11 | 1.15  | 9  | 1.90 |   | 6    | 1.31  | 14583  |  |
| Glucosamine--fructose-6-phosphate aminotransferase [isomerizing] 2 (EC 2.6.1.16) (         | Q9Z2Z9  | GFPT2_MOUSE  | 1  | 0.36  |    |       |    |      |   |      |       | 14584  |  |
| Glucose-6-phosphate 1-dehydrogenase X (EC 1.1.1.49) (G6PD)                                 | Q00612  | GPX1_MOUSE   | 11 | 1.30  | 13 | 1.15  | 3  | 1.78 |   | 1    | 1.36  | 14381  |  |
| Glucosidase II beta subunit precursor (Protein kinase C substrate, 60.1 kDa protein, h     | O08795  | GLU2B_MOUSE  | 2  | 1.44  | 3  | 1.60  | 2  | 2.52 |   | 2    | 1.36  | 19089  |  |
| Glutamate [NMDA] receptor subunit 3B precursor (N-methyl-D-aspartate receptor sub          | Q91ZU9  | NMD3B_MOUSE  |    |       | 1  | 0.80  |    |      |   |      |       | 170483 |  |
| Glutamate dehydrogenase 1, mitochondrial precursor (EC 1.4.1.3) (GDH)                      | P26443  | DHE3_MOUSE   | 23 | 1.31  | 17 | 1.24  | 6  | 1.05 |   | 22   | 1.01  | 14661  |  |
| Glutamate--cysteine ligase catalytic subunit (EC 6.3.2.2) (Gamma-glutamylcysteine s        | P97494  | GSH1_MOUSE   | 3  | 1.52  | 1  | 0.92  | 2  | 1.86 |   | 2    | 1.51  | 14629  |  |
| Glutamyl aminopeptidase (EC 3.4.11.7) (EAP) (Aminopeptidase A) (APA) (BP-1/6C3 ;           | P16406  | AMPE_MOUSE   | 10 | 1.12  | 7  | 1.20  | 4  | 0.78 |   | 1    | 0.31  | 13809  |  |
| Glutaryl-CoA dehydrogenase, mitochondrial precursor (EC 1.3.99.7) (GCD)                    | Q60759  | GCDH_MOUSE   | 2  | 1.25  | 3  | 1.60  | 2  | 0.93 |   |      |       | 270076 |  |
| Glutathione peroxidase (EC 1.11.1.9) (GSHPx-1) (Cellular glutathione peroxidase)           | P11352  | GPX1_MOUSE   |    |       | 1  | 1.05  |    |      |   | 1    | 3.57  | 14775  |  |
| Glutathione reductase, mitochondrial precursor (EC 1.8.1.7) (GR) (GRase)                   | P47791  | GSHR_MOUSE   | 3  | 1.43  | 2  | 2.43  | 2  | 2.41 |   | 3    | 2.01  | 14782  |  |
| Glutathione S-transferase Mu 1 (EC 2.5.1.18) (GST class-mu 1) (Glutathione S-transf        | P10649  | GSTM1_MOUSE  | 2  | 1.70  | 1  | 1.54  | 4  | 1.55 |   | 2    | 1.29  | 14862  |  |
| Glutathione S-transferase Mu 2 (EC 2.5.1.18) (GST class-mu 2) (Glutathione S-transf        | P15626  | GSTM2_MOUSE  | 6  | 1.62  | 2  | 0.57  | 1  | 0.58 |   |      |       | 14863  |  |
| Glutathione S-transferase Mu 5 (EC 2.5.1.18) (GST class-mu 5) (Fibrous sheath com          | P48774  | GSTM5_MOUSE  | 3  | 2.19  | 2  | 2.69  |    |      |   |      |       | 14866  |  |
| Glutathione transferase omega 1 (EC 2.5.1.18) (GSTO 1-1) (p28)                             | O09131  | GSTO1_MOUSE  | 2  | 1.59  | 4  | 1.28  | 3  | 1.86 |   | 1    | 1.38  | 14873  |  |
| Glycine amidinotransferase, mitochondrial precursor (EC 2.1.4.1) (L-arginine:glycine :     | Q9D964  | GATM_MOUSE   | 1  | 0.71  | 1  | 0.95  | 1  | 0.87 |   |      |       | 67092  |  |

|                                                                                        |        |             |    |       |    |      |    |      |    |      |        |  |
|----------------------------------------------------------------------------------------|--------|-------------|----|-------|----|------|----|------|----|------|--------|--|
| Glycine receptor alpha 3 subunit                                                       | Q7TSQ2 | Q7TSQ2      | 1  | 4.71  |    |      |    |      |    |      |        |  |
| Glycogen phosphorylase, brain form (EC 2.4.1.1)                                        | Q8CI94 | PHS3_MOUSE  |    |       |    |      |    |      | 3  | 1.46 | 110078 |  |
| Glycogen synthase kinase-3 beta (EC 2.7.1.37) (GSK-3 beta)                             | Q9WV60 | GSK3B_MOUSE | 6  | 1.15  |    |      |    |      | 1  | 1.15 | 56637  |  |
| Glycogenin-1 (EC 2.4.1.186)                                                            | Q9R062 | GLYG_MOUSE  |    |       | 1  | 0.81 | 1  | 2.44 |    |      | 27357  |  |
| Glycyl-tRNA synthetase (EC 6.1.1.14) (Glycine--tRNA ligase) (GlyRS)                    | Q9CZD3 | SYG_MOUSE   | 7  | 2.92  | 4  | 1.99 | 2  | 0.92 | 5  | 1.32 | 353172 |  |
| Glyoxylate reductase/hydroxypyruvate reductase (EC 1.1.1.79)                           | Q91Z53 | GRHPR_MOUSE | 6  | 1.95  | 5  | 1.37 | 3  | 0.98 |    |      | 76238  |  |
| Glypican-1 precursor                                                                   | Q9QZF2 | GPC1_MOUSE  | 8  | 1.43  | 10 | 1.29 | 2  | 1.30 | 3  | 0.82 |        |  |
| Glypican-4 precursor (K-glypican)                                                      | P51655 | GPC4_MOUSE  | 18 | 2.51  | 14 | 2.85 | 4  | 0.75 | 4  | 0.80 | 14735  |  |
| Gm169 protein                                                                          | Q8R2R6 | Q8R2R6      | 1  | 0.87  |    |      |    |      |    |      |        |  |
| GMP reductase 1 (EC 1.7.1.7) (Guanosine 5'-monophosphate oxidoreductase 1) (Gu         | Q9DCZ1 | GMPR1_MOUSE |    |       |    |      | 1  | 0.54 | 2  | 1.21 | 66355  |  |
| GMP reductase 2 (EC 1.7.1.7) (Guanosine 5'-monophosphate oxidoreductase 2) (Gu         | Q99L27 | GMPR2_MOUSE |    |       | 1  | 7.79 |    |      | 1  | 1.43 | 105446 |  |
| Gmps protein (Fragment)                                                                | Q66JZ6 | Q66JZ6      | 4  | 1.95  | 4  | 1.25 | 3  | 0.89 | 1  | 2.18 |        |  |
| Golgb1 protein (Fragment)                                                              | Q8CGE5 | Q8CGE5      |    |       | 1  | 3.84 |    |      |    |      |        |  |
| Golgi apparatus protein 1 precursor (Golgi sialoglycoprotein MG-160) (E-selectin ligar | Q61543 | GSLG1_MOUSE | 50 | 1.47  | 71 | 1.44 | 28 | 1.23 | 46 | 0.83 | 20340  |  |
| Golgi autoantigen, golgin subfamily A member 2 (Golgi matrix protein GM130)            | Q921M4 | GOGA2_MOUSE | 2  | 5.16  | 2  | 1.67 | 1  | 1.24 | 1  | 0.68 | 99412  |  |
| Golgi autoantigen, golgin subfamily A member 3 (Golgin-160) (Male-enhanced antigen     | P55937 | GOGA3_MOUSE | 3  | 0.54  |    |      |    |      |    |      | 269682 |  |
| Golgi autoantigen, golgin subfamily A member 4 (tGolgin-1)                             | Q91VW5 | GOGA4_MOUSE |    |       | 1  | 0.75 | 1  | 1.14 |    |      | 54214  |  |
| Golgi reassembly stacking protein 2 (GRS2) (Golgi reassembly stacking protein of 55    | Q99JX3 | GORS2_MOUSE | 2  | 1.49  | 2  | 1.47 |    |      |    |      | 70231  |  |
| Golgi resident protein GCP60 (Acyl-Coenzyme A binding domain containing 3) (Golgi      | Q8BMP6 | GCP60_MOUSE | 1  | 2.56  | 1  | 1.20 |    |      | 3  | 0.90 | 170760 |  |
| Golgi-specific brefeldin A-resistance factor 1                                         | Q6DFZ1 | Q6DFZ1      | 3  | 2.28  | 1  | 1.70 |    |      |    |      |        |  |
| GPI transamidase component PIG-T precursor (Phosphatidylinositol-glycan biosynthe      | Q8BXQ2 | PIGT_MOUSE  |    |       | 1  | 1.54 |    |      |    |      | 78928  |  |
| GPI-anchored alpha-2 macroglobulin-related protein (CD109 antigen)                     | Q8R422 | Q8R422      | 5  | 1.29  | 4  | 1.42 | 2  | 1.24 | 2  | 0.79 |        |  |
| G-protein coupled receptor 64 precursor (Epididymis-specific protein 6) (Me6 receptor  | Q8CJ12 | GPR64_MOUSE |    |       | 1  | 4.85 |    |      |    |      | 237175 |  |
| Granzyme C precursor (EC 3.4.21.-) (Cytotoxic cell protease 2) (CCP2) (B10)            | P08882 | GRAC_MOUSE  |    |       | 1  | 2.63 |    |      |    |      | 14940  |  |
| GRIP and coiled-coil domain-containing protein 2 (Golgi coiled coil protein GCC185)    | Q8CHG3 | GCC2_MOUSE  | 2  | 0.86  | 3  | 0.74 | 2  | 1.18 | 5  | 0.99 | 70297  |  |
| Growth arrest and DNA-damage-inducible protein GADD45 alpha (DNA-damage indu           | P48316 | GA45A_MOUSE | 1  | 0.02  |    |      |    |      |    |      | 13197  |  |
| Growth factor receptor-bound protein 14 (GRB14 adapter protein)                        | Q9JLM9 | GRB14_MOUSE | 1  | 1.07  | 4  | 1.45 | 1  | 1.01 |    |      | 50915  |  |
| Growth factor receptor-bound protein 2 (GRB2 adapter protein) (SH2/SH3 adapter GF      | Q60631 | GRB2_MOUSE  | 2  | 1.08  | 2  | 0.99 |    |      |    |      | 14784  |  |
| Growth-arrest-specific protein 6 precursor (GAS-6)                                     | Q61592 | GAS6_MOUSE  |    |       | 2  | 1.29 |    |      | 3  | 0.78 | 14456  |  |
| Grp94 neighboring nucleotidase variant 3                                               | Q692V3 | Q692V3      | 1  | 1.65  | 1  | 1.02 |    |      |    |      |        |  |
| GrpE protein homolog 1, mitochondrial precursor (Mt-GrpE#1)                            | Q99LP6 | GRPE1_MOUSE | 5  | 1.13  | 6  | 1.02 | 4  | 1.03 | 1  | 0.78 | 17713  |  |
| GTP cyclohydrolase I feedback regulatory protein (GFRP) (p35)                          | P99025 | GFRP_MOUSE  |    |       |    |      | 1  | 1.27 |    |      |        |  |
| GTPase activating RapGAP domain-like 1 (GAP-related interacting partner to E12) (G     | Q6GYP7 | GRIPE_MOUSE | 1  | 0.69  |    |      |    |      |    |      | 56784  |  |
| GTP-binding protein                                                                    | Q61635 | Q61635      | 2  | 2.33  | 4  | 1.99 | 1  | 1.98 | 2  | 1.67 |        |  |
| GTP-binding protein SAR1b                                                              | Q9CQC9 | SAR1B_MOUSE | 3  | 1.55  |    |      |    |      |    |      | 66397  |  |
| Guanine nucleotide exchange factor                                                     | Q91ZZ2 | Q91ZZ2      | 1  | 2.94  | 1  | 0.41 |    |      |    |      |        |  |
| Guanine nucleotide release/exchange factor Ras-GRF2                                    | P70392 | P70392      | 1  | 2.17  |    |      |    |      |    |      |        |  |
| Guanine nucleotide-binding protein beta subunit 2-like 1 (Receptor of activated protei | P68040 | GBLP_MOUSE  | 37 | 1.55  | 60 | 1.27 | 27 | 1.39 | 43 | 1.23 | 14694  |  |
| Guanine nucleotide-binding protein beta subunit 4 (Transducin beta chain 4)            | P29387 | GBB4_MOUSE  | 1  | 22.39 |    |      |    |      |    |      | 14696  |  |
| Guanine nucleotide-binding protein G(i), alpha-2 subunit (Adenylate cyclase-inhibiting | P08752 | GNAI2_MOUSE | 16 | 1.33  | 8  | 1.29 | 6  | 0.99 | 4  | 0.86 | 14678  |  |
| Guanine nucleotide-binding protein G(i)/G(s)/G(o) gamma-10 subunit                     | Q9CXP8 | GBG10_MOUSE | 2  | 2.07  | 4  | 1.41 | 3  | 1.22 | 3  | 0.96 | 14700  |  |
| Guanine nucleotide-binding protein G(i)/G(s)/G(o) gamma-12 subunit                     | Q9DAS9 | GBG12_MOUSE | 2  | 1.72  | 3  | 0.76 |    |      |    |      | 14701  |  |
| Guanine nucleotide-binding protein G(i)/G(s)/G(o) gamma-5 subunit                      | Q80S27 | GBG5_MOUSE  | 1  | 1.22  | 4  | 1.19 | 2  | 1.18 | 4  | 0.82 | 14707  |  |
| Guanine nucleotide-binding protein G(i)/G(s)/G(t) beta subunit 1 (Transducin beta ch   | P62874 | GBB1_MOUSE  | 11 | 1.50  | 8  | 2.35 | 3  | 0.68 | 7  | 0.81 | 14688  |  |
| Guanine nucleotide-binding protein G(i)/G(s)/G(t) beta subunit 2 (Transducin beta ch   | P62880 | GBB2_MOUSE  | 14 | 1.05  | 11 | 1.25 | 3  | 0.74 | 3  | 0.83 | 14693  |  |
| Guanine nucleotide-binding protein G(k), alpha subunit (G(i) alpha-3)                  | Q9DC51 | GNAI3_MOUSE | 6  | 1.24  | 8  | 1.23 | 3  | 1.38 | 1  | 0.87 | 14679  |  |
| Guanine nucleotide-binding protein, alpha-13 subunit (G alpha 13)                      | P27601 | GNA13_MOUSE |    |       | 1  | 0.99 |    |      | 1  | 0.72 | 14674  |  |
| H-2 class I histocompatibility antigen, D-37 alpha chain precursor                     | P06339 | HA15_MOUSE  | 2  | 0.85  | 1  | 1.35 |    |      |    |      | 15040  |  |
| Haloacid dehalogenase-like hydrolase domain containing protein 4                       | Q9CPT3 | HDHD4_MOUSE |    |       | 1  | 3.87 |    |      |    |      | 67311  |  |
| Hamartin                                                                               | Q9EP53 | Q9EP53      | 1  | 1.35  |    |      |    |      | 2  | 1.45 |        |  |
| HCV NS5A-transactivated protein 9 homolog                                              | Q9CQX4 | N5A9_MOUSE  | 1  | 1.44  | 1  | 1.30 |    |      |    |      | 68026  |  |
| Hdac6 protein                                                                          | Q8CGC3 | Q8CGC3      |    |       | 1  | 0.99 |    |      |    |      |        |  |
| Heat shock 70 kDa protein 12B                                                          | Q9CZJ2 | HS12B_MOUSE | 1  | 1.39  | 2  | 3.15 |    |      |    |      | 72630  |  |
| Heat shock 70 kDa protein 4L (Osmotic stress protein 94) (Heat shock 70-related prot   | P48722 | HS74L_MOUSE |    |       |    |      |    |      | 2  | 1.48 | 18415  |  |
| Heat shock cognate 71 kDa protein (Heat shock 70 kDa protein 8)                        | P63017 | HSP7C_MOUSE | 2  | 1.10  | 2  | 0.66 |    |      |    |      | 15481  |  |
| Heat shock factor protein 1 (HSF 1) (Heat shock transcription factor 1) (HSTF 1)       | P38532 | HSF1_MOUSE  |    |       |    |      |    |      | 1  | 0.85 | 15499  |  |
| Heat shock protein 75 kDa, mitochondrial precursor (HSP 75) (Tumor necrosis factor     | Q9CQN1 | TRAP1_MOUSE | 6  | 1.36  | 9  | 0.91 | 6  | 1.20 | 2  | 1.28 | 68015  |  |
| Helicase DDX32                                                                         | Q8VH39 | Q8VH39      |    |       | 1  | 0.11 |    |      | 3  | 0.14 |        |  |
| Helicase with zinc finger domain                                                       | Q6DFV5 | Q6DFV5      | 1  | 2.74  |    |      | 1  | 0.75 |    |      |        |  |
| Hematopoietic progenitor cell antigen CD34 precursor                                   | Q64314 | CD34_MOUSE  | 5  | 0.96  | 8  | 1.21 | 1  | 1.05 | 13 | 1.16 | 12490  |  |
| Hematopoietic zinc finger protein                                                      | Q9QY68 | Q9QY68      | 1  | 1.66  |    |      |    |      | 2  | 1.01 |        |  |

|                                                                                                      |         |             |    |         |    |      |    |       |    |      |        |  |
|------------------------------------------------------------------------------------------------------|---------|-------------|----|---------|----|------|----|-------|----|------|--------|--|
| Hematopoietic-specific IL-2 deubiquitinating enzyme                                                  | O55190  | O55190      |    |         |    |      | 1  | 0.20  |    |      |        |  |
| Hepatitis B virus X interacting protein homolog (HBX-interacting protein) (HBV X inter: Q9D1L9)      | P16056  | XIP_MOUSE   | 1  | 1.97    | 4  | 1.46 | 1  | 2.14  | 4  | 0.84 | 68576  |  |
| Hepatocyte growth factor receptor precursor (EC 2.7.1.112) (Met proto-oncogene tyro P16056)          | P51859  | MET_MOUSE   |    |         |    | 0.09 |    |       |    |      | 17295  |  |
| Hepatoma-derived growth factor (HDGF)                                                                | Q8BLY7  | HDGF_MOUSE  | 1  | 1.15    | 3  | 1.47 |    |       | 2  | 1.41 | 15191  |  |
| Hermansky-Pudlak syndrome 6 protein homolog (Ruby-eye protein) (Ru)                                  | Q6A4J8  | HPS6_MOUSE  |    |         |    | 3.37 |    |       |    |      | 20170  |  |
| Herpesvirus-associated ubiquitin-specific protease                                                   | Q60668  | Q6A4J8      |    |         |    | 0.76 | 2  | 1.39  |    |      |        |  |
| Heterogeneous nuclear ribonucleoprotein D0 (hnRNP D0) (AU-rich element RNA-bind Q60668)              | P70333  | HNRPD_MOUSE | 8  | 1.34    | 17 | 1.80 | 11 | 1.10  | 12 | 1.03 | 11991  |  |
| Heterogeneous nuclear ribonucleoprotein H' (hnRNP H')                                                | P61979  | HNRH2_MOUSE | 1  | 0.82    | 2  | 2.00 |    |       |    |      | 56258  |  |
| Heterogeneous nuclear ribonucleoprotein K                                                            | Q8R081  | HNRPK_MOUSE | 9  | 1.93    | 9  | 2.11 | 6  | 1.10  | 5  | 1.18 | 15387  |  |
| Heterogeneous nuclear ribonucleoprotein L (hnRNP L)                                                  | Q921F4  | HNRPL_MOUSE | 11 | 1.41    | 8  | 2.74 | 4  | 1.11  | 3  | 0.93 | 15388  |  |
| Heterogeneous nuclear ribonucleoprotein L-like                                                       | Q9D0E1  | HNRL_MOUSE  | 5  | 1.38    | 4  | 5.56 | 6  | 2.04  | 4  | 0.98 |        |  |
| Heterogeneous nuclear ribonucleoprotein M (hnRNP M)                                                  | Q88568  | HNRPM_MOUSE | 8  | 1.25    | 14 | 1.24 | 6  | 1.02  | 8  | 1.04 | 76936  |  |
| Heterogeneous nuclear ribonucleoprotein Q (hnRNP Q) (hnRNP-Q) (Synaptotagmin t Q7TMK9)               | O08528  | HNRPQ_MOUSE | 4  | 1.45    | 3  | 1.25 | 2  | 1.08  | 3  | 0.90 | 56403  |  |
| Heterogeneous nuclear ribonucleoprotein U                                                            | Q62219  | O88568      | 2  | 5.39    | 6  | 3.66 |    |       | 10 | 2.04 |        |  |
| Hexokinase type II (EC 2.7.1.1) (HK II)                                                              | P63158  | HXK2_MOUSE  | 2  | 0.63    | 1  | 0.03 | 1  | 1.40  | 2  | 1.42 | 15277  |  |
| Hic-5 (Tgfb11 protein) (Paxillin-like protein) (Transforming growth factor beta 1 induc Q62219)      | O54879  | Q62219      | 5  | 3.66    | 5  | 1.89 | 8  | 1.79  | 15 | 1.19 |        |  |
| High mobility group protein 1 (HMG-1) (High mobility group protein B1)                               | Q54879  | HMG1_MOUSE  | 18 | 24.16   | 16 | 1.75 | 29 | 1.41  | 29 | 1.54 | 15289  |  |
| High mobility group protein 4 (HMG-4) (High mobility group protein 2a) (HMG-2a)                      | E088502 | HMG4_MOUSE  |    |         |    | 0.21 | 1  | 0.69  |    |      | 15354  |  |
| High-affinity cAMP-specific and IBMX-insensitive 3',5'-cyclic phosphodiesterase 8A (E O88502)        | Q7TPH6  | PDE8A_MOUSE |    |         |    | 2.70 |    |       | 3  | 1.51 | 18584  |  |
| Highwire                                                                                             | P62748  | Q7TPH6      | 3  | 1.10    | 1  | 2.60 | 2  | 1.39  | 3  | 3.49 |        |  |
| Hippocalcin-like protein 1 (Visinin-like protein 3) (VILIP-3) (Neural visinin-like protein 3 P62748) | P70349  | HPCL1_MOUSE | 2  | 0.98    | 2  | 0.43 |    |       |    |      | 53602  |  |
| Histidine triad nucleotide-binding protein 1 (Adenosine 5'-monophosphoramidase) (Pr P70349)          | Q99KK9  | HINT1_MOUSE | 20 | 2.52    | 9  | 2.03 | 6  | 2.65  | 7  | 1.80 | 15254  |  |
| Histidyl-tRNA synthetase-like                                                                        | O77968  | Q99KK9      | 1  | 0.71    | 3  | 1.06 |    |       | 1  | 5.40 |        |  |
| Histocompatibility antigen 60 (Fragment)                                                             | Q60973  | O77968      | 1  | 2561.04 |    |      |    |       |    |      |        |  |
| Histone acetyltransferase type B subunit 2 (Retinoblastoma binding protein p46) (Reti Q60973)        | O09106  | RBBP7_MOUSE | 3  | 1.38    | 3  | 1.17 | 2  | 0.69  | 1  | 1.41 | 245688 |  |
| Histone deacetylase 1 (HD1)                                                                          | Q8VH37  | HDAC1_MOUSE | 1  | 1.53    | 2  | 1.16 | 1  | 1.05  |    |      | 15181  |  |
| Histone deacetylase 8 (HD8)                                                                          | Q9VVG6  | HDAC8_MOUSE | 1  | 1.60    |    |      |    |       |    |      | 70315  |  |
| Histone-arginine methyltransferase CARM1 (EC 2.1.1.125) (EC 2.1.1.-) (Protein argin Q9VVG6)          | Q8BGC0  | CARM1_MOUSE | 12 | 1.83    | 9  | 0.97 | 4  | 1.42  | 5  | 1.03 |        |  |
| HIV TAT specific factor 1 (Mus musculus 7 days embryo whole body cDNA, RIKEN fu Q8BGC0)              | Q80WC7  | Q8BGC0      | 1  | 1.92    | 1  | 0.75 |    |       |    |      |        |  |
| HIV-1 Rev binding protein-like protein (Rev/Rex activation domain binding protein-rel Q80WC7)        | Q8BIL5  | HRBL_MOUSE  |    |         |    | 3.14 |    |       |    |      | 231801 |  |
| Hook homolog 1                                                                                       | Q61191  | HOOK1_MOUSE |    |         |    | 0.16 |    |       |    |      | 77963  |  |
| Host cell factor (HCF) (HCF-1) (C1 factor) [Contains: HCF N-terminal chain 1; HCF N-Q61191]          | Q8BNV1  | HCFC1_MOUSE | 5  | 1.62    | 11 | 1.66 | 9  | 1.55  | 12 | 1.34 |        |  |
| Hpal1 tiny fragments locus 9c protein                                                                | Q9Z1K1  | HTF9C_MOUSE | 1  | 2.43    | 2  | 2.49 | 3  | 1.21  | 3  | 1.99 | 15547  |  |
| HS1 binding protein 3                                                                                | Q99L47  | Q9Z1K1      |    |         |    | 1.27 |    |       |    |      |        |  |
| Hsc70-interacting protein (Hip) (Putative tumor suppressor ST13)                                     | Q8VCW6  | ST13_MOUSE  | 2  | 0.78    | 2  | 0.90 |    |       |    |      | 70356  |  |
| Hsp105 protein                                                                                       | Q99P31  | Q8VCW6      | 9  | 1.40    | 2  | 0.94 |    |       | 2  | 1.52 |        |  |
| Hsp70 binding protein (Hsp70-interacting protein) (Mus musculus 2 days neonate thyr Q99P31)          | Q61081  | Q99P31      | 6  | 1.60    | 5  | 1.28 | 4  | 1.91  | 2  | 1.81 |        |  |
| Hsp90 co-chaperone Cdc37 (Hsp90 chaperone protein kinase-targeting subunit) (p50 Q61081)             | Q6NZD0  | CDC37_MOUSE | 7  | 0.95    | 6  | 0.34 |    |       |    |      | 12539  |  |
| Hspa8 protein                                                                                        | Q8VD75  | Q6NZD0      | 1  | 0.81    | 1  | 0.98 |    |       |    |      |        |  |
| Huntingtin interacting protein 1                                                                     | Q99KB8  | Q8VD75      | 1  | 0.82    | 2  | 6.82 |    |       |    |      |        |  |
| Hydroxyacylglutathione hydrolase (EC 3.1.2.6) (Glyoxalase II) (Glx II)                               | Q80X75  | GLO2_MOUSE  | 1  | 3.60    |    |      |    |       | 2  | 1.77 | 14651  |  |
| Hyou1 protein                                                                                        | Q698K9  | Q80X75      | 9  | 1.13    | 11 | 1.02 | 6  | 1.09  | 7  | 0.93 |        |  |
| Hyperplastic discs protein                                                                           | Q6P3A2  | Q698K9      | 1  | 0.61    |    |      |    |       | 3  | 1.22 |        |  |
| Hypothetical gene supported by BC064115                                                              | O89002  | Q6P3A2      |    |         |    | 0.05 |    |       |    |      |        |  |
| Hypothetical protein                                                                                 | Q5FWH9  | O89002      |    |         |    |      | 1  | 0.51  |    |      |        |  |
| Hypothetical protein                                                                                 | Q5HZG9  | Q5FWH9      |    |         |    | 1.15 |    |       |    |      |        |  |
| Hypothetical protein                                                                                 | Q5M8P2  | Q5HZG9      |    |         |    |      |    |       | 1  | 0.96 |        |  |
| Hypothetical protein                                                                                 | Q5PR15  | Q5M8P2      |    |         |    |      | 1  | 12.58 |    |      |        |  |
| Hypothetical protein                                                                                 | Q5U471  | Q5PR15      |    |         |    |      |    |       | 1  | 0.06 |        |  |
| Hypothetical protein                                                                                 | Q640N2  | Q5U471      |    |         |    |      |    |       | 2  | 0.87 |        |  |
| Hypothetical protein                                                                                 | Q6DI61  | Q640N2      |    |         | 1  | 1.22 |    |       |    |      |        |  |
| Hypothetical protein                                                                                 | Q6NVF9  | Q6DI61      |    |         |    |      | 1  | 1.22  |    |      |        |  |
| Hypothetical protein                                                                                 | Q6P1H6  | Q6NVF9      | 4  | 1.86    | 4  | 1.64 |    |       |    |      |        |  |
| Hypothetical protein                                                                                 | Q6P4T2  | Q6P1H6      |    |         | 1  | 0.85 |    |       |    |      |        |  |
| Hypothetical protein                                                                                 | Q6RUT6  | Q6P4T2      | 5  | 1.31    | 5  | 2.21 | 3  | 1.09  | 3  | 1.20 |        |  |
| Hypothetical protein                                                                                 | Q80VD1  | Q6RUT6      | 1  | 1.82    |    |      |    |       | 1  | 0.92 |        |  |
| Hypothetical protein                                                                                 | Q9JJB4  | Q80VD1      | 6  | 1.35    | 6  | 1.46 | 3  | 1.36  | 8  | 1.22 |        |  |
| Hypothetical protein                                                                                 | Q640Q4  | Q9JJB4      |    |         | 1  | 2.83 |    |       |    |      |        |  |
| Hypothetical protein (Fragment)                                                                      | Q6GQW1  | Q640Q4      | 6  | 1.43    |    |      | 2  | 1.75  | 3  | 1.26 |        |  |
| Hypothetical protein (Fragment)                                                                      | Q6GQX8  | Q6GQW1      |    |         | 1  | 3.07 |    |       |    |      |        |  |
| Hypothetical protein (Fragment)                                                                      |         | Q6GQX8      |    |         | 1  | 3.31 |    |       |    |      |        |  |





|                                                                                                                |        |             |    |      |    |      |    |      |    |       |        |
|----------------------------------------------------------------------------------------------------------------|--------|-------------|----|------|----|------|----|------|----|-------|--------|
| Integrin beta-3 precursor (Platelet membrane glycoprotein IIIa) (GPIIIa) (CD61 antigen)                        | O54890 | ITB3_MOUSE  | 1  | 1.02 |    |      | 2  | 1.70 | 1  | 1.15  | 16416  |
| Integrin-linked kinase-associated serine/threonine phosphatase 2C                                              | Q8R0F6 | Q8R0F6      | 4  | 1.48 | 2  | 1.81 | 1  | 0.79 | 2  | 1.43  |        |
| Integrin-linked protein kinase (EC 2.7.1.37)                                                                   | O55222 | ILK_MOUSE   | 1  | 0.75 |    |      |    |      |    |       | 16202  |
| Intercellular adhesion molecule-1 precursor (ICAM-1) (MALA-2)                                                  | P13597 | ICAM1_MOUSE |    |      | 1  | 8.50 |    |      |    |       | 15894  |
| Interferon regulatory factor 3 (IRF-3)                                                                         | P70671 | IRF3_MOUSE  | 2  | 1.86 | 2  | 1.82 |    |      |    |       | 54131  |
| Interferon regulatory factor 6 (IRF-6)                                                                         | P97431 | IRF6_MOUSE  |    |      |    |      |    |      | 1  | 1.27  | 54139  |
| Interferon-g induced GTPase                                                                                    | Q9Z1M2 | Q9Z1M2      |    |      |    |      |    |      | 2  | 0.48  |        |
| Interferon-induced 35 kDa protein homolog (IFP 35)                                                             | Q9D8C4 | IN35_MOUSE  |    |      |    |      |    |      | 3  | 1.22  | 70110  |
| Interferon-induced guanylate-binding protein 2 (GTP-binding protein 2) (Guanine nucleotide exchange factor 2)  | Q9Z0E6 | GBP2_MOUSE  | 1  | 1.78 | 2  | 1.05 | 1  | 1.08 | 2  | 0.42  | 14469  |
| Interleukin-1 receptor, type I precursor (IL-1R-1) (P80)                                                       | P13504 | IL1R1_MOUSE | 2  | 0.16 |    |      |    |      |    |       | 16177  |
| Interleukin-1 receptor-like 1 precursor (ST2 protein) (T1 protein) (Lymphocyte antigen 96)                     | P14719 | ILRL1_MOUSE |    |      | 2  | 0.79 |    |      |    |       | 17082  |
| Interleukin-17B precursor (IL-17B) (Cytokine-like protein ZCYTO7) (Neuronal interleukin-17)                    | Q9QXT6 | IL17B_MOUSE | 1  | 1.05 |    |      |    |      |    |       | 56069  |
| Interleukin-4 precursor (IL-4) (B-cell stimulatory factor 1) (BSF-1) (Lymphocyte stimulatory factor 1)         | P07750 | IL4_MOUSE   |    |      | 1  | 1.53 |    |      |    |       | 16189  |
| Intersectin 1 isoform 11 (Fragment)                                                                            | Q6J1T0 | Q6J1T0      |    |      |    |      |    |      | 1  | 16.76 |        |
| Intersectin 2 (SH3 domain-containing protein 1B) (EH and SH3 domains protein 2) (EIP3)                         | Q9Z0R6 | ITSN2_MOUSE | 1  | 0.27 |    |      |    |      |    |       | 20403  |
| Iqsec1 protein (Fragment)                                                                                      | Q8R0S2 | Q8R0S2      |    |      | 1  | 1.61 |    |      | 2  | 1.45  |        |
| Iron-responsive element binding protein 1 (IRE-BP 1) (Iron regulatory protein 1) (IRP1)                        | P28271 | IREB1_MOUSE |    |      |    |      | 1  | 1.30 | 1  | 1.87  | 11428  |
| Islr protein                                                                                                   | Q6GU68 | Q6GU68      |    |      | 2  | 1.33 | 1  | 3.11 | 1  | 0.88  |        |
| Isocitrate dehydrogenase [NAD] subunit gamma, mitochondrial precursor (EC 1.1.1.41)                            | P70404 | IDH3G_MOUSE | 6  | 1.56 | 5  | 1.68 | 2  | 1.03 | 5  | 0.91  | 15929  |
| Isoleucyl-tRNA synthetase, cytoplasmic (EC 6.1.1.5) (Isoleucine--tRNA ligase) (IleRS)                          | Q8BU30 | SY1_MOUSE   | 9  | 1.60 | 5  | 1.28 | 3  | 1.52 | 8  | 1.49  | 105148 |
| Isopentenyl-diphosphate delta-isomerase 1 (EC 5.3.3.2) (IPP isomerase 1) (Isopentenyl diphosphate isomerase 1) | P58044 | ID11_MOUSE  | 2  | 1.00 | 5  | 5.52 |    |      | 6  | 2.43  | 319554 |
| Itp5 protein (Fragment)                                                                                        | Q8R3B0 | Q8R3B0      | 1  | 0.99 |    |      |    |      |    |       |        |
| Jagged 1 precursor (Jagged1)                                                                                   | Q9QXX0 | JAG1_MOUSE  |    |      |    |      |    |      | 2  | 1.19  | 16449  |
| JKTBP (Heterogeneous nuclear ribonucleoprotein D-like)                                                         | Q9Z130 | Q9Z130      | 5  | 1.34 | 7  | 2.42 | 3  | 1.05 | 4  | 0.61  |        |
| Jumonji protein (Jumonji/ARID domain-containing protein 2)                                                     | Q62315 | JARD2_MOUSE |    |      |    |      | 1  | 1.61 |    |       | 16468  |
| Kcmf1 protein                                                                                                  | Q80UY2 | Q80UY2      | 3  | 2.19 |    |      |    |      | 3  | 1.19  |        |
| Keratinocyte growth factor precursor (KGF) (Fibroblast growth factor-7) (FGF-7) (HBC)                          | P36363 | FGF7_MOUSE  | 1  | 2.18 | 2  | 1.43 |    |      | 3  | 0.79  | 14178  |
| Ki-67 protein                                                                                                  | Q61769 | Q61769      | 1  | 2.16 | 1  | 1.62 |    |      | 2  | 1.61  |        |
| Kidney and liver proline oxidase 1 (Fragment)                                                                  | Q9QX62 | Q9QX62      | 1  | 0.37 |    |      |    |      |    |       |        |
| Kif14 protein (Fragment)                                                                                       | Q7TQJ9 | Q7TQJ9      |    |      |    |      |    |      | 1  | 4.15  |        |
| Kinesin family member 11                                                                                       | Q6P9P6 | Q6P9P6      | 1  | 2.00 |    |      |    |      | 1  | 2.22  |        |
| Kinesin family member 21A                                                                                      | Q9QXL2 | KI21A_MOUSE | 3  | 1.32 |    |      |    |      | 4  | 1.23  | 16564  |
| Kinesin heavy chain (Ubiquitous kinesin heavy chain) (UKHC)                                                    | Q61768 | KINH_MOUSE  | 6  | 1.51 | 2  | 2.75 | 2  | 1.16 |    |       | 16573  |
| Kinesin-like 7                                                                                                 | Q6P9L6 | Q6P9L6      |    |      |    |      |    |      | 1  | 0.52  |        |
| Kinesin-like protein KIF1B                                                                                     | Q60575 | KIF1B_MOUSE | 1  | 1.38 |    |      |    |      |    |       | 16561  |
| Lactadherin precursor (Milk fat globule-EGF factor 8) (MFG-E8) (MFGM) (Sperm surface protein 1)                | P21956 | MFGM_MOUSE  |    |      |    |      |    |      | 5  | 1.60  | 17304  |
| Lactation elevated 1                                                                                           | Q8K1E9 | Q8K1E9      |    |      | 1  | 6.08 |    |      |    |       |        |
| LAG1 longevity assurance homolog 5 (Translocating chain-associating membrane protein 5)                        | Q9D6K9 | LASS5_MOUSE | 2  | 1.31 | 1  | 2.17 |    |      | 3  | 1.19  | 71949  |
| LALP1                                                                                                          | Q9ET10 | Q9ET10      |    |      | 1  | 0.09 |    | 0.08 |    |       |        |
| Laminin alpha-4 chain precursor                                                                                | P97927 | LAMA4_MOUSE |    |      | 1  | 2.85 | 2  | 0.49 | 2  | 0.75  | 16775  |
| Laminin beta-1 chain precursor (Laminin B1 chain)                                                              | P02469 | LAMB1_MOUSE | 9  | 1.79 | 14 | 2.41 | 4  | 1.11 | 23 | 1.25  | 16777  |
| Laminin gamma-1 chain precursor (Laminin B2 chain)                                                             | P02468 | LAMC1_MOUSE | 1  | 0.11 | 3  | 2.81 |    |      | 6  | 1.45  | 226519 |
| Laminin, beta 2                                                                                                | Q8R0Y0 | Q8R0Y0      |    |      | 3  | 1.45 | 2  | 1.24 | 2  | 0.47  |        |
| LanC-like protein 1 (40 kDa erythrocyte membrane protein) (p40)                                                | Q89112 | LANC1_MOUSE | 2  | 1.83 | 4  | 1.34 | 2  | 1.00 | 3  | 1.09  | 14768  |
| LanC-like protein 2 (Testis-specific adriamycin sensitivity protein)                                           | Q9JJK2 | LANC2_MOUSE | 1  | 2.78 | 4  | 1.47 | 1  | 1.62 | 4  | 1.13  | 71835  |
| Lanosterol synthase (EC 5.4.99.7) (Oxidosqualene--lanosterol cyclase) (2,3-epoxysqualene cyclase)              | Q8BLN5 | ERG7_MOUSE  | 3  | 1.17 | 4  | 0.97 | 1  | 1.92 |    |       |        |
| LAP2 protein (ErbB2-interacting protein) (Erbin) (Densin-180-like protein)                                     | Q80TH2 | LAP2_MOUSE  | 1  | 0.79 | 7  | 1.24 | 2  | 0.69 | 5  | 0.67  | 59079  |
| LAP4 protein (Scribble homolog protein)                                                                        | Q80U72 | LAP4_MOUSE  | 2  | 1.02 |    |      |    |      |    |       | 105782 |
| Large proline-rich protein BAT3 (HLA-B-associated transcript 3)                                                | Q9Z1R2 | Q9Z1R2      | 1  | 1.09 | 3  | 0.98 |    |      |    |       |        |
| Las11 protein                                                                                                  | Q8K277 | Q8K277      |    |      |    |      |    |      | 3  | 1.56  |        |
| Late endosomal/lysosomal Mp1 interacting protein (p14)                                                         | Q9JHS3 | LM1P_MOUSE  | 1  | 1.67 |    |      |    |      |    |       | 83409  |
| Latent transforming growth factor beta binding protein, isoform 1S precursor (LTBP-1)                          | Q8CG18 | LTB1S_MOUSE |    |      | 3  | 1.96 | 2  | 2.63 | 3  | 1.45  | 268977 |
| Latent transforming growth factor-beta-binding protein 2 precursor (LTBP-2)                                    | O08999 | LTBP2_MOUSE |    |      |    |      |    |      | 1  | 1.29  | 16997  |
| Latexin                                                                                                        | P70202 | LXN_MOUSE   | 3  | 2.42 |    |      |    |      |    |       |        |
| Latrophilin 1                                                                                                  | Q5U4D5 | Q5U4D5      |    |      |    |      |    |      | 1  | 0.53  |        |
| Latrophilin 2 (Calcium-independent alpha-latrotoxin receptor 2) (Fragment)                                     | Q8JZZ7 | LPHN2_MOUSE | 2  | 0.85 | 3  | 1.79 |    |      | 1  | 0.47  | 99633  |
| Lectin lambda                                                                                                  | Q64449 | Q64449      | 36 | 1.33 | 25 | 1.17 | 25 | 1.16 | 24 | 1.06  |        |
| Left-right dynein                                                                                              | Q9QZH1 | Q9QZH1      | 1  | 1.11 |    |      |    |      |    |       |        |
| Legumain precursor (EC 3.4.22.34) (Asparaginyl endopeptidase) (Protease, cysteine)                             | O89017 | LGMN_MOUSE  | 1  | 0.98 |    |      |    |      |    |       | 19141  |
| Leprecan-like 1 protein                                                                                        | Q8CG71 | Q8CG71      | 1  | 7.44 | 1  | 4.06 |    |      | 2  | 1.21  |        |
| Leprecan-like protein 2 (Prolyl 3-hydroxylase 3)                                                               | Q8CG70 | Q8CG70      | 18 | 1.43 | 20 | 1.65 | 11 | 1.10 | 19 | 1.05  |        |





|                                                                                                |             |    |      |    |      |   |      |    |       |        |
|------------------------------------------------------------------------------------------------|-------------|----|------|----|------|---|------|----|-------|--------|
| Mitochondrial processing peptidase beta subunit, mitochondrial precursor (EC 3.4.24. Q9CXT8    | MPPB_MOUSE  | 5  | 1.03 | 6  | 1.20 |   |      | 2  | 1.04  | 73078  |
| Mitogen-activated protein kinase 3 (EC 2.7.1.37) (Extracellular signal-regulated kinase Q63844 | MK03_MOUSE  | 2  | 1.95 | 3  | 1.16 |   |      | 4  | 2.00  | 26417  |
| Mitogen-activated protein kinase kinase 1 interacting protein 1 (MEK binding partner 1 O88653  | MK111_MOUSE |    |      |    |      |   |      | 1  | 0.60  | 56692  |
| Mitogen-activated protein kinase kinase kinase 4 (EC 2.7.1.37) (MAPK/ERK kinase ki O08648      | M3K4_MOUSE  | 1  | 2.04 | 1  | 1.44 |   |      |    |       | 26407  |
| Mitogen-activated protein kinase kinase kinase 5 (EC 2.7.1.37) (MAPK/ERK kinase ki O35099      | M3K5_MOUSE  |    |      |    |      |   |      | 1  | 30.02 | 26408  |
| Mitogen-activated protein kinase kinase kinase 8 (EC 2.7.1.37) (COT proto-oncogene Q07174      | M3K8_MOUSE  |    |      |    |      |   |      | 1  | 0.05  | 26410  |
| Mitogen-activated protein kinase kinase kinase 3 (EC 2.7.1.37) (MAPK/ERK ki Q99JP0             | M4K3_MOUSE  | 1  | 1.31 | 1  | 1.21 |   |      | 1  | 0.97  | 225028 |
| Mitotic checkpoint protein BUB3 (WD-repeat type I transmembrane protein A72.5) Q9WVA3          | BUB3_MOUSE  | 3  | 1.40 | 4  | 1.10 | 1 | 0.99 | 1  | 1.64  | 12237  |
| MKIAA0051 protein (Fragment) Q6ZQK2                                                            | Q6ZQK2      | 2  | 1.65 |    |      |   |      |    |       |        |
| MKIAA0097 protein (Fragment) Q80U79                                                            | Q80U79      |    |      | 1  | 2.08 |   |      |    |       |        |
| MKIAA0136 protein (Fragment) Q6A0C2                                                            | Q6A0C2      |    |      |    |      |   |      | 1  | 3.16  |        |
| MKIAA0166 protein (Fragment) Q6A0B3                                                            | Q6A0B3      | 2  | 0.63 |    |      |   |      | 1  | 1.57  |        |
| MKIAA0169 protein (Fragment) Q6ZQH8                                                            | Q6ZQH8      |    |      |    |      |   |      | 2  | 3.06  |        |
| MKIAA0177 protein (Fragment) Q6A0B1                                                            | Q6A0B1      | 2  | 5.14 |    |      |   |      |    |       |        |
| MKIAA0183 protein (Fragment) Q6A0A9                                                            | Q6A0A9      | 4  | 2.44 | 1  | 1.12 |   |      |    |       |        |
| MKIAA0225 protein (Fragment) Q6ZQG1                                                            | Q6ZQG1      | 4  | 1.49 | 7  | 2.06 | 3 | 1.24 | 6  | 1.34  |        |
| MKIAA0230 protein (Fragment) Q80U60                                                            | Q80U60      | 2  | 1.00 | 1  | 1.44 |   |      | 2  | 2.15  |        |
| MKIAA0290 protein (Fragment) Q6A091                                                            | Q6A091      |    |      |    |      |   |      | 1  | 0.19  |        |
| MKIAA0297 protein (Fragment) Q6ZQE1                                                            | Q6ZQE1      | 1  | 3.71 | 1  | 0.33 |   |      |    |       |        |
| MKIAA0300 protein (Fragment) Q80U45                                                            | Q80U45      |    |      |    |      |   |      | 1  | 3.75  |        |
| MKIAA0315 protein (Fragment) Q8CHG6                                                            | Q8CHG6      | 6  | 1.66 | 6  | 2.10 | 3 | 0.80 | 6  | 0.73  |        |
| MKIAA0337 protein (Fragment) Q80U35                                                            | Q80U35      | 1  | 1.44 | 3  | 0.99 | 2 | 1.08 | 2  | 0.80  |        |
| MKIAA0372 protein (Fragment) Q6ZQC8                                                            | Q6ZQC8      | 1  | 1.25 |    |      |   |      |    |       |        |
| MKIAA0421 protein (Fragment) Q6ZQC0                                                            | Q6ZQC0      | 1  | 0.68 |    |      |   |      |    |       |        |
| MKIAA0462 protein (Fragment) Q8CHF3                                                            | Q8CHF3      | 1  | 0.83 | 2  | 1.26 |   |      | 3  | 1.63  |        |
| MKIAA0493 protein (Fragment) Q80TZ0                                                            | Q80TZ0      |    |      |    |      |   |      | 1  | 0.37  |        |
| MKIAA0543 protein (Fragment) Q6ZQ98                                                            | Q6ZQ98      | 1  | 0.49 |    |      |   |      |    |       |        |
| MKIAA0570 protein (Fragment) Q6ZQ93                                                            | Q6ZQ93      | 1  | 1.46 | 1  | 1.04 | 1 | 1.02 | 1  | 1.46  |        |
| MKIAA0578 protein (Fragment) Q8CHE6                                                            | Q8CHE6      |    |      | 1  | 1.01 |   |      |    |       |        |
| MKIAA0602 protein (Fragment) Q80TW2                                                            | Q80TW2      | 1  | 1.04 |    |      |   |      |    |       |        |
| MKIAA0615 protein (Fragment) Q6A037                                                            | Q6A037      |    |      |    |      | 1 | 1.66 |    |       |        |
| MKIAA0629 protein (Fragment) Q6ZQ80                                                            | Q6ZQ80      |    |      |    |      | 1 | 2.36 |    |       |        |
| MKIAA0665 protein (Fragment) Q8CHD8                                                            | Q8CHD8      |    |      |    |      |   |      | 2  | 0.65  |        |
| MKIAA0678 protein (Fragment) Q8CHD7                                                            | Q8CHD7      | 2  | 0.77 |    |      |   |      |    |       |        |
| MKIAA0700 protein (Fragment) Q6A013                                                            | Q6A013      |    |      | 1  | 2.19 |   |      |    |       |        |
| MKIAA0725 protein (Fragment) Q6A008                                                            | Q6A008      |    |      |    |      |   |      | 1  | 0.09  |        |
| MKIAA0754 protein (Fragment) Q69ZZ9                                                            | Q69ZZ9      |    |      |    |      |   |      | 3  | 0.23  |        |
| MKIAA0777 protein (Fragment) Q80TS1                                                            | Q80TS1      |    |      | 1  | 0.97 |   |      |    |       |        |
| MKIAA0782 protein (Fragment) Q6ZQ48                                                            | Q6ZQ48      |    |      |    |      | 2 | 1.43 | 2  | 2.71  |        |
| MKIAA0784 protein (Fragment) Q6ZQ47                                                            | Q6ZQ47      |    |      | 1  | 1.35 |   |      | 1  | 2.60  |        |
| MKIAA0824 protein (Fragment) Q69ZY3                                                            | Q69ZY3      | 1  | 0.95 |    |      |   |      |    |       |        |
| MKIAA0829 protein (Fragment) Q6ZQ38                                                            | Q6ZQ38      | 18 | 1.86 | 22 | 1.33 | 4 | 1.85 | 16 | 1.20  |        |
| MKIAA0838 protein (Fragment) Q69ZX9                                                            | Q69ZX9      | 11 | 1.32 | 16 | 1.29 | 5 | 1.02 | 8  | 1.34  |        |
| MKIAA0858 protein (Fragment) Q6ZQ32                                                            | Q6ZQ32      |    |      | 1  | 1.63 |   |      |    |       |        |
| MKIAA0889 protein (Fragment) Q69ZW6                                                            | Q69ZW6      |    |      | 1  | 1.81 |   |      | 1  | 1.17  |        |
| MKIAA1031 protein (Fragment) Q6ZPZ8                                                            | Q6ZPZ8      |    |      |    |      | 1 | 0.53 | 2  | 1.14  |        |
| MKIAA1064 protein (Fragment) Q6ZPZ3                                                            | Q6ZPZ3      | 1  | 1.27 |    |      | 2 | 0.89 |    |       |        |
| MKIAA1131 protein (Fragment) Q69ZR2                                                            | Q69ZR2      |    |      |    |      | 2 | 1.82 | 2  | 0.86  |        |
| MKIAA1196 protein (Fragment) Q6ZPW1                                                            | Q6ZPW1      |    |      | 1  | 1.10 |   |      |    |       |        |
| MKIAA1200 protein (Fragment) Q80TI1                                                            | Q80TI1      |    |      |    |      |   |      | 1  | 0.03  |        |
| MKIAA1221 protein (Fragment) Q80TH4                                                            | Q80TH4      |    |      | 1  | 0.61 |   |      |    |       |        |
| MKIAA1235 protein (Fragment) Q6ZPV5                                                            | Q6ZPV5      |    |      |    |      |   |      | 1  | 2.08  |        |
| MKIAA1375 protein (Fragment) Q6ZPS9                                                            | Q6ZPS9      | 2  | 1.29 |    |      |   |      |    |       |        |
| MKIAA1413 protein (Fragment) Q69ZK1                                                            | Q69ZK1      |    |      | 1  | 5.25 |   |      |    |       |        |
| MKIAA1429 protein (Fragment) Q80TD6                                                            | Q80TD6      |    |      | 1  | 1.04 |   |      |    |       |        |
| MKIAA1432 protein (Fragment) Q69ZJ7                                                            | Q69ZJ7      |    |      | 3  | 4.36 |   |      |    |       |        |
| MKIAA1451 protein (Fragment) Q69ZJ4                                                            | Q69ZJ4      | 1  | 1.54 | 1  | 0.88 | 1 | 0.27 | 1  | 0.69  |        |
| MKIAA1458 protein (Fragment) Q6ZPQ5                                                            | Q6ZPQ5      |    |      | 1  | 0.68 |   |      |    |       |        |
| MKIAA1554 protein (Fragment) Q69ZG7                                                            | Q69ZG7      |    |      |    |      |   |      | 1  | 1.61  |        |
| MKIAA1601 protein (Fragment) Q6ZPL8                                                            | Q6ZPL8      | 3  | 0.88 | 3  | 1.12 | 2 | 3.10 | 4  | 0.77  |        |
| MKIAA1676 protein (Fragment) Q6ZPK2                                                            | Q6ZPK2      |    |      |    |      | 1 | 9.20 |    |       |        |

|                                                                                                                 |        |             |   |       |  |   |      |      |      |      |        |        |
|-----------------------------------------------------------------------------------------------------------------|--------|-------------|---|-------|--|---|------|------|------|------|--------|--------|
| MKIAA1728 protein (Fragment)                                                                                    | Q8CHA0 | Q8CHA0      |   |       |  | 1 |      | 0.84 |      |      |        |        |
| MKIAA1840 protein (Fragment)                                                                                    | Q6ZPH3 | Q6ZPH3      | 1 | 2.62  |  |   |      |      |      |      |        |        |
| MKIAA1850 protein (Fragment)                                                                                    | Q80T83 | Q80T83      |   |       |  |   |      |      | 1    | 1.35 |        |        |
| MKIAA1891 protein (Fragment)                                                                                    | Q6ZPG3 | Q6ZPG3      | 1 | 31.58 |  |   |      |      |      |      |        |        |
| MKIAA1897 protein (Fragment)                                                                                    | Q69Z76 | Q69Z76      |   |       |  | 1 | 1.11 |      | 1    | 0.52 |        |        |
| MKIAA1901 protein (Fragment)                                                                                    | Q69Z74 | Q69Z74      | 2 | 1.12  |  | 1 | 1.30 | 2    | 2    | 0.80 |        |        |
| MKIAA2002 protein (Fragment)                                                                                    | Q69Z38 | Q69Z38      |   |       |  | 2 | 3.23 | 2    | 1.38 | 4    | 1.43   |        |
| MKIAA2005 protein (Fragment)                                                                                    | Q69Z37 | Q69Z37      | 1 | 1.03  |  |   |      |      |      |      |        |        |
| MKIAA2014 protein (Fragment)                                                                                    | Q6ZPF4 | Q6ZPF4      | 1 | 2.32  |  |   |      |      |      |      |        |        |
| Mocs1 protein                                                                                                   | Q8R058 | Q8R058      |   |       |  | 1 | 1.56 |      |      |      |        |        |
| Mod1 protein                                                                                                    | Q921S3 | Q921S3      | 2 | 2.13  |  | 2 | 1.49 | 2    | 1.80 | 2    | 1.20   |        |
| Moesin (Membrane-organizing extension spike protein)                                                            | P26041 | MOES_MOUSE  | 2 | 1.28  |  | 2 | 1.07 |      |      |      | 17698  |        |
| Molecule interacting with Rab13 (MIRab13) (MICAL-like protein 1)                                                | Q8BGT6 | MILK1_MOUSE | 1 | 1.08  |  | 5 | 0.58 |      |      |      | 27008  |        |
| Molybdenum cofactor synthesis protein 2 small subunit (Molybdopterin synthase small subunit)                    | Q92224 | MOS2S_MOUSE |   |       |  |   |      | 1    | 1.87 |      | 17434  |        |
| Monocyte differentiation antigen CD14 precursor (Myeloid cell-specific leucine-rich glycoprotein 10)            | P10810 | CD14_MOUSE  | 1 | 1.18  |  | 3 | 1.22 |      |      |      | 12475  |        |
| Mortality factor 4-like protein 1 (MORF-related gene 15 protein) (Transcription factor-II P60762)               | P60762 | MO4L1_MOUSE | 1 | 0.93  |  |   |      |      |      |      | 21761  |        |
| Mothers against decapentaplegic homolog 4 (SMAD 4) (Mothers against DPP homolog P97471)                         | P97471 | SMAD4_MOUSE |   |       |  |   |      | 1    | 0.76 | 2    | 1.68   |        |
| MPRL-2 (Mus musculus 15 days embryo male testis cDNA, RIKEN full-length enriched library, clone: O70274)        | O70274 | O70274      | 1 | 0.74  |  | 1 | 0.26 |      |      | 4    | 1.16   |        |
| Mps one binder kinase activator-like 2A (Mob1 homolog 2A)                                                       | Q8BSU7 | MOL2A_MOUSE | 1 | 1.01  |  |   |      |      |      |      | 208228 |        |
| Mps one binder kinase activator-like 3 (Mob1 homolog 3) (Mob3) (Class II mMOB1) (F Q8PEB6)                      | Q8PEB6 | MOB3_MOUSE  | 1 | 2.77  |  | 2 | 0.88 |      |      | 1    | 1.57   | 19070  |
| Mrp137 protein (Mitochondrial ribosomal protein L37)                                                            | Q921S7 | Q921S7      |   |       |  | 4 | 0.90 |      |      |      |        |        |
| Mrpl44 protein (Fragment)                                                                                       | Q8VE61 | Q8VE61      | 2 | 1.23  |  | 1 | 2.36 |      |      | 2    | 1.07   |        |
| Mtmr6 protein (Mus musculus 15 days embryo head cDNA, RIKEN full-length enriched library, clone: Q8VE11)        | Q8VE11 | Q8VE11      | 1 | 8.90  |  |   |      | 1    | 1.87 | 2    | 0.85   |        |
| Mucolipin-3                                                                                                     | Q8R4F0 | MCLN3_MOUSE |   |       |  | 1 | 2.05 |      |      | 1    | 0.74   | 171166 |
| Multiple EGF-like-domain protein 4                                                                              | P60882 | EGFL4_MOUSE | 1 | 1.26  |  |   |      |      |      | 3    | 1.64   | 269878 |
| Multisynthetase complex auxiliary component p43 [Contains: Endothelial-monocyte attachment activator protein 1] | P31230 | MCA1_MOUSE  |   |       |  | 1 | 0.81 |      |      |      |        | 13722  |
| Mus musculus 0 day neonate cerebellum cDNA, RIKEN full-length enriched library, clone: Q8BUU4                   | Q8BUU4 | Q8BUU4      |   |       |  |   |      |      |      | 2    | 0.93   |        |
| Mus musculus 0 day neonate cerebellum cDNA, RIKEN full-length enriched library, clone: Q8BUU8                   | Q8BUU8 | Q8BUU8      |   |       |  | 2 | 0.87 |      |      | 1    | 1.10   |        |
| Mus musculus 0 day neonate cerebellum cDNA, RIKEN full-length enriched library, clone: Q8BUU5                   | Q8BUU5 | Q8BUU5      | 4 | 2.05  |  | 3 | 1.56 |      |      | 1    | 2.38   |        |
| Mus musculus 0 day neonate cerebellum cDNA, RIKEN full-length enriched library, clone: Q8BGI1                   | Q8BGI1 | Q8BGI1      |   |       |  | 1 | 0.38 |      |      | 1    | 2.24   |        |
| Mus musculus 0 day neonate cerebellum cDNA, RIKEN full-length enriched library, clone: Q8C7X2                   | Q8C7X2 | Q8C7X2      | 4 | 0.96  |  | 1 | 1.48 |      |      |      |        |        |
| Mus musculus 0 day neonate cortex cDNA, RIKEN full-length enriched library, clone: Q8BJ90                       | Q8BJ90 | Q8BJ90      |   |       |  | 1 | 2.00 |      |      | 2    | 1.51   |        |
| Mus musculus 0 day neonate eyeball cDNA, RIKEN full-length enriched library, clone: Q8BPT3                      | Q8BPT3 | Q8BPT3      | 2 | 4.08  |  | 4 | 2.49 | 2    | 1.07 | 3    | 0.98   |        |
| Mus musculus 0 day neonate eyeball cDNA, RIKEN full-length enriched library, clone: Q8BN78                      | Q8BN78 | Q8BN78      |   |       |  | 1 | 0.15 |      |      | 1    | 0.15   |        |
| Mus musculus 0 day neonate eyeball cDNA, RIKEN full-length enriched library, clone: Q8BPS4                      | Q8BPS4 | Q8BPS4      |   |       |  | 1 | 0.72 |      |      |      |        |        |
| Mus musculus 0 day neonate eyeball cDNA, RIKEN full-length enriched library, clone: Q8BJC6                      | Q8BJC6 | Q8BJC6      |   |       |  |   |      |      |      | 1    | 2.50   |        |
| Mus musculus 0 day neonate eyeball cDNA, RIKEN full-length enriched library, clone: Q8BPM5                      | Q8BPM5 | Q8BPM5      |   |       |  | 1 | 1.07 |      |      |      |        |        |
| Mus musculus 0 day neonate head cDNA, RIKEN full-length enriched library, clone: Q8C120                         | Q8C120 | Q8C120      |   |       |  |   |      |      |      | 1    | 2.79   |        |
| Mus musculus 0 day neonate head cDNA, RIKEN full-length enriched library, clone: Q9D610                         | Q9D610 | Q9D610      | 1 | 0.04  |  |   |      |      |      |      |        |        |
| Mus musculus 0 day neonate head cDNA, RIKEN full-length enriched library, clone: Q8BVU5                         | Q8BVU5 | Q8BVU5      | 6 | 1.47  |  | 6 | 1.24 | 5    | 1.62 | 4    | 1.46   |        |
| Mus musculus 0 day neonate head cDNA, RIKEN full-length enriched library, clone: Q8C0Z1                         | Q8C0Z1 | Q8C0Z1      | 2 | 2.26  |  | 1 | 1.70 | 1    | 1.06 | 2    | 0.94   |        |
| Mus musculus 0 day neonate head cDNA, RIKEN full-length enriched library, clone: Q8BVU0                         | Q8BVU0 | Q8BVU0      | 1 | 1.96  |  | 2 | 1.40 |      |      |      |        |        |
| Mus musculus 0 day neonate kidney cDNA, RIKEN full-length enriched library, clone: Q8BWF5                       | Q8BWF5 | Q8BWF5      |   |       |  |   |      |      |      | 1    | 3.71   |        |
| Mus musculus 0 day neonate lung cDNA, RIKEN full-length enriched library, clone: E0 Q8BU92                      | Q8BU92 | Q8BU92      |   |       |  | 1 | 8.50 |      |      | 1    | 1.10   |        |
| Mus musculus 0 day neonate lung cDNA, RIKEN full-length enriched library, clone: E0 Q8BU85                      | Q8BU85 | Q8BU85      | 5 | 3.20  |  | 5 | 2.68 | 2    | 2.43 | 9    | 1.50   |        |
| Mus musculus 0 day neonate lung cDNA, RIKEN full-length enriched library, clone: E0 Q8BU71                      | Q8BU71 | Q8BU71      |   |       |  |   |      |      |      | 1    | 1.26   |        |
| Mus musculus 0 day neonate skin cDNA, RIKEN full-length enriched library, clone: Q8CEE5                         | Q8CEE5 | Q8CEE5      |   |       |  |   |      |      |      | 1    | 1.21   |        |
| Mus musculus 0 day neonate skin cDNA, RIKEN full-length enriched library, clone: Q9D678                         | Q9D678 | Q9D678      |   |       |  | 1 | 0.88 |      |      |      |        |        |
| Mus musculus 0 day neonate skin cDNA, RIKEN full-length enriched library, clone: Q8C1B1                         | Q8C1B1 | Q8C1B1      | 1 | 1.75  |  | 1 | 1.41 | 1    | 1.05 |      |        |        |
| Mus musculus 0 day neonate thymus cDNA, RIKEN full-length enriched library, clone: Q8BGH2                       | Q8BGH2 | Q8BGH2      |   |       |  |   |      | 2    | 4.50 | 2    | 1.16   |        |
| Mus musculus 0 day neonate thymus cDNA, RIKEN full-length enriched library, clone: Q8BGR6                       | Q8BGR6 | Q8BGR6      |   |       |  | 1 | 1.19 | 3    | 1.67 |      |        |        |
| Mus musculus 0 day neonate thymus cDNA, RIKEN full-length enriched library, clone: Q8BGE3                       | Q8BGE3 | Q8BGE3      | 7 | 1.06  |  | 7 | 1.05 | 1    | 1.59 | 2    | 0.64   |        |
| Mus musculus 0 day neonate thymus cDNA, RIKEN full-length enriched library, clone: Q8BV57                       | Q8BV57 | Q8BV57      | 1 | 1.89  |  | 2 | 1.08 | 2    | 1.07 | 2    | 0.76   |        |
| Mus musculus 1.5 years female mammary gland CRL-2116 JC cDNA, RIKEN full-length enriched library, clone: Q8C1X1 | Q8C1X1 | Q8C1X1      | 1 | 1.00  |  |   |      |      |      | 1    | 0.99   |        |
| Mus musculus 10 day old male pancreas cDNA, RIKEN full-length enriched library, clone: Q9D967                   | Q9D967 | Q9D967      | 2 | 1.64  |  | 1 | 1.25 |      |      |      |        |        |
| Mus musculus 10 day old male pancreas cDNA, RIKEN full-length enriched library, clone: Q9D8W7                   | Q9D8W7 | Q9D8W7      |   |       |  |   |      |      |      | 1    | 0.68   |        |
| Mus musculus 10 day old male pancreas cDNA, RIKEN full-length enriched library, clone: Q9CQD2                   | Q9CQD2 | Q9CQD2      | 2 | 1.24  |  | 3 | 1.26 |      |      |      |        |        |
| Mus musculus 10 day old male pancreas cDNA, RIKEN full-length enriched library, clone: Q9D8T2                   | Q9D8T2 | Q9D8T2      | 1 | 2.60  |  | 1 | 1.41 | 2    | 2.17 |      |        |        |
| Mus musculus 10 day old male pancreas cDNA, RIKEN full-length enriched library, clone: Q9CQ15                   | Q9CQ15 | Q9CQ15      |   |       |  | 2 | 0.88 | 1    | 2.36 |      |        |        |
| Mus musculus 10 day old male pancreas cDNA, RIKEN full-length enriched library, clone: Q9CPS6                   | Q9CPS6 | Q9CPS6      | 1 | 1.18  |  |   |      |      |      | 1    | 1.27   |        |
| Mus musculus 10 day old male pancreas cDNA, RIKEN full-length enriched library, clone: Q9D8M4                   | Q9D8M4 | Q9D8M4      | 1 | 0.88  |  |   |      |      |      |      |        |        |

|                                                                                                                                       |        |   |       |   |       |   |       |  |   |      |
|---------------------------------------------------------------------------------------------------------------------------------------|--------|---|-------|---|-------|---|-------|--|---|------|
| Mus musculus 10 days embryo whole body cDNA, RIKEN full-length enriched library, Q9D0L4                                               | Q9D0L4 | 1 | 1.75  |   |       |   |       |  | 2 | 0.89 |
| Mus musculus 10 days embryo whole body cDNA, RIKEN full-length enriched library, Q9D0H2                                               | Q9D0H2 | 5 | 1.21  | 6 | 1.17  | 2 | 0.70  |  | 4 | 1.30 |
| Mus musculus 10 days embryo whole body cDNA, RIKEN full-length enriched library, Q9D0B5                                               | Q9D0B5 | 2 | 1.76  | 1 | 1.71  | 4 | 1.14  |  | 2 | 0.82 |
| Mus musculus 10 days embryo whole body cDNA, RIKEN full-length enriched library, Q9D0B0                                               | Q9D0B0 | 1 | 1.31  | 2 | 3.68  | 1 | 1.98  |  |   |      |
| Mus musculus 10 days embryo whole body cDNA, RIKEN full-length enriched library, Q8BHS9                                               | Q8BHS9 | 5 | 1.63  | 5 | 0.82  | 2 | 1.59  |  | 7 | 1.16 |
| Mus musculus 10 days embryo whole body cDNA, RIKEN full-length enriched library, Q9CSX2                                               | Q9CSX2 |   |       | 1 | 0.31  |   |       |  |   |      |
| Mus musculus 10 days embryo whole body cDNA, RIKEN full-length enriched library, Q9D061                                               | Q9D061 |   |       | 2 | 1.55  | 1 | 0.50  |  |   |      |
| Mus musculus 10 days embryo whole body cDNA, RIKEN full-length enriched library, Q9CSW7                                               | Q9CSW7 |   |       |   |       | 1 | 2.86  |  |   |      |
| Mus musculus 10 days embryo whole body cDNA, RIKEN full-length enriched library, Q9CSW3                                               | Q9CSW3 | 1 | 1.05  |   |       |   |       |  |   |      |
| Mus musculus 10 days embryo whole body cDNA, RIKEN full-length enriched library, Q9D020                                               | Q9D020 |   |       |   |       |   |       |  | 1 | 1.48 |
| Mus musculus 10 days embryo whole body cDNA, RIKEN full-length enriched library, Q9D009                                               | Q9D009 |   |       | 1 | 2.37  |   |       |  |   |      |
| Mus musculus 10 days embryo whole body cDNA, RIKEN full-length enriched library, Q9CPS1                                               | Q9CPS1 | 1 | 0.08  |   |       |   |       |  |   |      |
| Mus musculus 10 days embryo whole body cDNA, RIKEN full-length enriched library, Q9CZX9                                               | Q9CZX9 | 1 | 1.48  | 1 | 1.77  |   |       |  |   |      |
| Mus musculus 10 days embryo whole body cDNA, RIKEN full-length enriched library, Q9CZX7                                               | Q9CZX7 | 4 | 3.08  | 6 | 2.18  | 2 | 1.25  |  | 7 | 1.07 |
| Mus musculus 10 days embryo whole body cDNA, RIKEN full-length enriched library, Q8BT13                                               | Q8BT13 |   |       | 5 | 2.45  |   |       |  | 5 | 1.06 |
| Mus musculus 10 days embryo whole body cDNA, RIKEN full-length enriched library, Q8QZS1                                               | Q8QZS1 | 6 | 1.43  | 5 | 1.30  | 4 | 1.40  |  | 2 | 0.88 |
| Mus musculus 10 days embryo whole body cDNA, RIKEN full-length enriched library, Q8BK67                                               | Q8BK67 | 5 | 1.65  | 2 | 1.34  | 1 | 1.57  |  | 3 | 2.66 |
| Mus musculus 10 days lactation, adult female mammary gland cDNA, RIKEN full-length enriched library, Q8BGY0                           | Q8BGY0 |   |       | 1 | 1.47  |   |       |  |   |      |
| Mus musculus 10 days neonate cerebellum cDNA, RIKEN full-length enriched library, Q8C8I9                                              | Q8C8I9 |   |       | 1 | 73.78 |   |       |  |   |      |
| Mus musculus 10 days neonate cerebellum cDNA, RIKEN full-length enriched library, Q8BXF6                                              | Q8BXF6 | 1 | 0.43  |   |       |   |       |  |   |      |
| Mus musculus 10 days neonate cerebellum cDNA, RIKEN full-length enriched library, Q8C8E5                                              | Q8C8E5 | 3 | 1.19  | 3 | 0.77  |   |       |  |   |      |
| Mus musculus 10 days neonate cerebellum cDNA, RIKEN full-length enriched library, Q8BGC4                                              | Q8BGC4 | 8 | 1.27  | 6 | 1.47  | 2 | 0.44  |  | 5 | 1.18 |
| Mus musculus 10 days neonate cortex cDNA, RIKEN full-length enriched library, clone: Q8BRT1                                           | Q8BRT1 | 1 | 0.61  | 1 | 16.09 |   |       |  |   |      |
| Mus musculus 10 days neonate cortex cDNA, RIKEN full-length enriched library, clone: Q8BH02                                           | Q8BH02 |   |       |   |       |   |       |  | 2 | 0.34 |
| Mus musculus 10 days neonate cortex cDNA, RIKEN full-length enriched library, clone: Q8BRN9                                           | Q8BRN9 |   |       |   |       | 1 | 13.35 |  |   |      |
| Mus musculus 10 days neonate medulla oblongata cDNA, RIKEN full-length enriched library, clone: Q8BI80                                | Q8BI80 |   |       |   |       |   |       |  | 1 | 1.71 |
| Mus musculus 10 days neonate medulla oblongata cDNA, RIKEN full-length enriched library, clone: Q8C8K6                                | Q8C8K6 |   |       | 1 | 1.95  |   |       |  |   |      |
| Mus musculus 10 days neonate skin cDNA, RIKEN full-length enriched library, clone: Q8C1A5                                             | Q8C1A5 | 4 | 1.92  | 5 | 2.12  | 2 | 1.33  |  | 6 | 1.46 |
| Mus musculus 10 days neonate skin cDNA, RIKEN full-length enriched library, clone: Q8BH17                                             | Q8BH17 |   |       |   |       |   |       |  | 2 | 0.92 |
| Mus musculus 10 days neonate skin cDNA, RIKEN full-length enriched library, clone: Q8BIS1                                             | Q8BIS1 |   |       | 1 | 4.10  |   |       |  |   |      |
| Mus musculus 10 days neonate skin cDNA, RIKEN full-length enriched library, clone: Q8C129                                             | Q8C129 | 3 | 1.16  | 3 | 1.04  |   |       |  |   |      |
| Mus musculus 10 days neonate skin cDNA, RIKEN full-length enriched library, clone: Q8CE34                                             | Q8CE34 | 1 | 1.97  |   |       |   |       |  |   |      |
| Mus musculus 10 days neonate skin cDNA, RIKEN full-length enriched library, clone: Q8BHJ9                                             | Q8BHJ9 |   |       | 1 | 1.86  |   |       |  |   |      |
| Mus musculus 10, 11 days embryo whole body cDNA, RIKEN full-length enriched library, clone: Q9CQP3                                    | Q9CQP3 | 1 | 0.88  | 2 | 1.05  |   |       |  |   |      |
| Mus musculus 10, 11 days embryo whole body cDNA, RIKEN full-length enriched library, clone: Q9CZ42                                    | Q9CZ42 | 4 | 1.71  | 3 | 0.79  |   |       |  |   |      |
| Mus musculus 10, 11 days embryo whole body cDNA, RIKEN full-length enriched library, clone: Q9CQM5                                    | Q9CQM5 | 3 | 6.97  | 3 | 3.11  | 3 | 1.82  |  | 5 | 1.65 |
| Mus musculus 10, 11 days embryo whole body cDNA, RIKEN full-length enriched library, clone: Q9CR39                                    | Q9CR39 | 3 | 1.12  |   |       | 2 | 1.33  |  |   |      |
| Mus musculus 11 days embryo gonad cDNA, RIKEN full-length enriched library, clone: Q8CCI5                                             | Q8CCI5 |   |       |   |       | 1 | 0.56  |  |   |      |
| Mus musculus 11 days embryo head cDNA, RIKEN full-length enriched library, clone: Q8BVJ3                                              | Q8BVJ3 | 1 | 0.59  |   |       |   |       |  |   |      |
| Mus musculus 11 days embryo whole body cDNA, RIKEN full-length enriched library, clone: Q9CZN8                                        | Q9CZN8 |   |       | 1 | 2.38  |   |       |  |   |      |
| Mus musculus 11 days pregnant adult female ovary and uterus cDNA, RIKEN full-length enriched library, clone: Q8BHC9                   | Q8BHC9 | 3 | 1.77  | 6 | 1.79  | 4 | 0.66  |  | 5 | 1.20 |
| Mus musculus 12 days embryo embryonic body between diaphragm region and neck cDNA, RIKEN full-length enriched library, clone: Q8BM86  | Q8BM86 | 1 | 2.74  |   |       |   |       |  |   |      |
| Mus musculus 12 days embryo embryonic body between diaphragm region and neck cDNA, RIKEN full-length enriched library, clone: Q8BM85  | Q8BM85 | 1 | 1.39  | 2 | 0.85  | 1 | 1.59  |  | 3 | 1.19 |
| Mus musculus 12 days embryo embryonic body between diaphragm region and neck cDNA, RIKEN full-length enriched library, clone: Q8BSE0  | Q8BSE0 | 1 | 1.83  | 3 | 2.86  |   |       |  | 1 | 0.54 |
| Mus musculus 12 days embryo embryonic body between diaphragm region and neck cDNA, RIKEN full-length enriched library, clone: Q8BT43  | Q8BT43 |   |       | 1 | 1.16  |   |       |  |   |      |
| Mus musculus 12 days embryo embryonic body between diaphragm region and neck cDNA, RIKEN full-length enriched library, clone: Q8BSC4  | Q8BSC4 |   |       | 1 | 1.03  |   |       |  |   |      |
| Mus musculus 12 days embryo embryonic body between diaphragm region and neck cDNA, RIKEN full-length enriched library, clone: Q8BSB4  | Q8BSB4 |   |       | 1 | 1.00  |   |       |  |   |      |
| Mus musculus 12 days embryo embryonic body between diaphragm region and neck cDNA, RIKEN full-length enriched library, clone: Q8BSA4  | Q8BSA4 | 1 | 12.14 |   |       |   |       |  |   |      |
| Mus musculus 12 days embryo embryonic body between diaphragm region and neck cDNA, RIKEN full-length enriched library, clone: Q8BM55  | Q8BM55 | 5 | 1.41  | 7 | 1.26  | 2 | 0.54  |  | 6 | 0.85 |
| Mus musculus 12 days embryo embryonic body between diaphragm region and neck cDNA, RIKEN full-length enriched library, clone: Q8BM52  | Q8BM52 |   |       | 1 | 0.13  |   |       |  |   |      |
| Mus musculus 12 days embryo embryonic body between diaphragm region and neck cDNA, RIKEN full-length enriched library, clone: Q9CX22  | Q9CX22 |   |       |   |       | 1 | 2.22  |  |   |      |
| Mus musculus 12 days embryo embryonic body between diaphragm region and neck cDNA, RIKEN full-length enriched library, clone: Q8BM47  | Q8BM47 |   |       | 2 | 0.59  |   |       |  | 1 | 0.02 |
| Mus musculus 12 days embryo embryonic body between diaphragm region and neck cDNA, RIKEN full-length enriched library, clone: Q8BJU2  | Q8BJU2 |   |       |   |       |   |       |  | 1 | 1.00 |
| Mus musculus 12 days embryo embryonic body between diaphragm region and neck cDNA, RIKEN full-length enriched library, clone: Q8BFQ4  | Q8BFQ4 | 2 | 1.44  | 2 | 0.92  |   |       |  |   |      |
| Mus musculus 12 days embryo eyeball cDNA, RIKEN full-length enriched library, clone: Q8BJE5                                           | Q8BJE5 | 4 | 1.81  | 2 | 1.33  | 3 | 2.32  |  | 2 | 1.33 |
| Mus musculus 12 days embryo female mullerian duct includes surrounding region cDNA, RIKEN full-length enriched library, clone: Q8BP08 | Q8BP08 |   |       |   |       | 1 | 1.72  |  | 1 | 8.72 |
| Mus musculus 12 days embryo head cDNA, RIKEN full-length enriched library, clone: Q9CXY6                                              | Q9CXY6 |   |       | 1 | 1.37  |   |       |  | 3 | 1.46 |
| Mus musculus 12 days embryo head cDNA, RIKEN full-length enriched library, clone: Q9CX86                                              | Q9CX86 | 5 | 3.77  | 3 | 1.81  | 2 | 1.30  |  | 4 | 0.89 |
| Mus musculus 12 days embryo male wolffian duct includes surrounding region cDNA, RIKEN full-length enriched library, clone: Q8BSL3    | Q8BSL3 |   |       | 1 | 1.05  |   |       |  |   |      |
| Mus musculus 12 days embryo male wolffian duct includes surrounding region cDNA, RIKEN full-length enriched library, clone: Q8BIQ6    | Q8BIQ6 | 1 | 20.82 |   |       |   |       |  |   |      |
| Mus musculus 12 days embryo spinal cord cDNA, RIKEN full-length enriched library, clone: Q8C7R4                                       | Q8C7R4 | 9 | 6.22  | 8 | 0.96  | 5 | 1.74  |  | 1 | 1.05 |

|                                                                                               |        |    |       |    |       |   |      |    |        |
|-----------------------------------------------------------------------------------------------|--------|----|-------|----|-------|---|------|----|--------|
| Mus musculus 12 days embryo spinal cord cDNA, RIKEN full-length enriched library, cQ8BWY1     | Q8BWY1 | 1  | 17.54 | 1  | 5.37  |   |      |    |        |
| Mus musculus 12 days embryo spinal cord cDNA, RIKEN full-length enriched library, cQ8BHG9     | Q8BHG9 | 2  | 3.84  |    |       |   |      |    |        |
| Mus musculus 12 days embryo spinal cord cDNA, RIKEN full-length enriched library, cQ8BUP7     | Q8BUP7 | 11 | 1.63  | 5  | 4.54  | 7 | 2.21 | 6  | 2.14   |
| Mus musculus 12 days embryo spinal ganglion cDNA, RIKEN full-length enriched library, cQ8BJH1 | Q8BJH1 |    |       | 4  | 1.43  |   |      | 2  | 17.38  |
| Mus musculus 12 days embryo spinal ganglion cDNA, RIKEN full-length enriched library, cQ8BJG6 | Q8BJG6 | 18 | 2.05  | 10 | 1.59  | 5 | 0.79 | 7  | 0.88   |
| Mus musculus 12 days embryo spinal ganglion cDNA, RIKEN full-length enriched library, cQ8BNC4 | Q8BNC4 |    |       |    |       |   |      | 1  | 3.17   |
| Mus musculus 12 days embryo spinal ganglion cDNA, RIKEN full-length enriched library, cQ8BQ03 | Q8BQ03 | 1  | 3.26  | 1  | 3.15  |   |      |    |        |
| Mus musculus 13 days embryo forelimb cDNA, RIKEN full-length enriched library, cQ8BSN3        | Q8BSN3 | 1  | 1.49  |    |       |   |      |    |        |
| Mus musculus 13 days embryo forelimb cDNA, RIKEN full-length enriched library, cQ8BSN1        | Q8BSN1 | 1  | 1.38  |    |       |   |      |    |        |
| Mus musculus 13 days embryo forelimb cDNA, RIKEN full-length enriched library, cQ8BH64        | Q8BH64 | 3  | 1.06  |    |       |   |      |    |        |
| Mus musculus 13 days embryo head cDNA, RIKEN full-length enriched library, cQ8CEG4            | Q8CEG4 | 3  | 1.84  | 6  | 0.84  | 1 | 1.74 | 1  | 1.32   |
| Mus musculus 13 days embryo head cDNA, RIKEN full-length enriched library, cQ9CQC6            | Q9CQC6 | 2  | 1.29  | 1  | 0.98  |   |      |    |        |
| Mus musculus 13 days embryo head cDNA, RIKEN full-length enriched library, cQ9CRC0            | Q9CRC0 | 8  | 1.24  | 12 | 1.45  | 9 | 1.02 | 11 | 0.93   |
| Mus musculus 13 days embryo head cDNA, RIKEN full-length enriched library, cQ9CXS4            | Q9CXS4 |    |       |    |       |   |      | 1  | 0.34   |
| Mus musculus 13 days embryo head cDNA, RIKEN full-length enriched library, cQ9CXR0            | Q9CXR0 |    |       | 1  | 2.33  |   |      |    |        |
| Mus musculus 13 days embryo head cDNA, RIKEN full-length enriched library, cQ9CXP1            | Q9CXP1 | 1  | 86.12 |    |       |   |      |    |        |
| Mus musculus 13 days embryo heart cDNA, RIKEN full-length enriched library, cQ8C3W9           | Q8C3W9 |    |       |    |       |   |      | 1  | 1.97   |
| Mus musculus 13 days embryo liver cDNA, RIKEN full-length enriched library, cQ9CY52           | Q9CY52 |    |       | 1  | 0.57  |   |      |    |        |
| Mus musculus 13 days embryo lung cDNA, RIKEN full-length enriched library, cQ8C760            | Q8C760 |    |       | 3  | 1.65  |   |      | 2  | 1.46   |
| Mus musculus 13 days embryo male testis cDNA, RIKEN full-length enriched library, cQ8C5P5     | Q8C5P5 |    |       |    |       |   |      | 1  | 8.56   |
| Mus musculus 13 days embryo male testis cDNA, RIKEN full-length enriched library, cQ8CD79     | Q8CD79 | 2  | 10.18 |    |       |   |      |    |        |
| Mus musculus 13 days embryo male testis cDNA, RIKEN full-length enriched library, cQ8CD58     | Q8CD58 |    |       |    |       |   |      | 1  | 5.02   |
| Mus musculus 13 days embryo male testis cDNA, RIKEN full-length enriched library, cQ8BIW9     | Q8BIW9 | 1  | 0.88  | 1  | 1.10  |   |      | 1  | 1.03   |
| Mus musculus 14, 17 days embryo head cDNA, RIKEN full-length enriched library, cQ8CEF9        | Q8CEF9 |    |       |    |       |   |      | 1  | 0.07   |
| Mus musculus 15 days embryo head cDNA, RIKEN full-length enriched library, cQ8C3E8            | Q8C3E8 | 6  | 1.19  | 7  | 0.65  | 2 | 1.42 | 3  | 0.93   |
| Mus musculus 15 days embryo head cDNA, RIKEN full-length enriched library, cQ8BWB6            | Q8BWB6 | 1  | 0.79  | 2  | 0.68  | 1 | 0.64 | 2  | 1.05   |
| Mus musculus 15 days embryo head cDNA, RIKEN full-length enriched library, cQ8BKG3            | Q8BKG3 | 22 | 1.48  | 12 | 1.16  | 5 | 0.96 | 4  | 0.85   |
| Mus musculus 15 days embryo male testis cDNA, RIKEN full-length enriched library, cQ8CCF0     | Q8CCF0 | 2  | 3.01  | 2  | 1.54  |   |      |    |        |
| Mus musculus 16 days embryo head cDNA, RIKEN full-length enriched library, cQ8C8B0            | Q8C8B0 |    |       | 1  | 1.08  |   |      |    |        |
| Mus musculus 16 days embryo head cDNA, RIKEN full-length enriched library, cQ8C4R5            | Q8C4R5 | 1  | 6.29  |    |       |   |      |    |        |
| Mus musculus 16 days embryo head cDNA, RIKEN full-length enriched library, cQ8BGF7            | Q8BGF7 |    |       | 1  | 50.80 |   |      |    |        |
| Mus musculus 16 days embryo head cDNA, RIKEN full-length enriched library, cQ63739            | Q63739 |    |       |    |       |   |      | 2  | 2.13   |
| Mus musculus 16 days embryo head cDNA, RIKEN full-length enriched library, cQ8BKY4            | Q8BKY4 |    |       |    |       | 1 | 0.71 |    |        |
| Mus musculus 16 days embryo head cDNA, RIKEN full-length enriched library, cQ8BXA7            | Q8BXA7 |    |       |    |       |   |      | 1  | 0.63   |
| Mus musculus 16 days embryo head cDNA, RIKEN full-length enriched library, cQ8C4L2            | Q8C4L2 |    |       |    |       | 1 | 1.19 |    |        |
| Mus musculus 16 days embryo head cDNA, RIKEN full-length enriched library, cQ8BUX7            | Q8BUX7 | 5  | 2.59  | 1  | 2.71  |   |      | 2  | 1.49   |
| Mus musculus 16 days embryo head cDNA, RIKEN full-length enriched library, cQ8BX87            | Q8BX87 |    |       |    |       | 1 | 1.47 |    |        |
| Mus musculus 16 days embryo lung cDNA, RIKEN full-length enriched library, cQ9CX97            | Q9CX97 |    |       | 1  | 3.03  |   |      | 1  | 6.15   |
| Mus musculus 16 days neonate cerebellum cDNA, RIKEN full-length enriched library, cQ8CBK7     | Q8CBK7 |    |       |    |       |   |      | 1  | 279.44 |
| Mus musculus 16 days neonate cerebellum cDNA, RIKEN full-length enriched library, cQ8CBJ6     | Q8CBJ6 |    |       | 1  | 1.51  |   |      |    |        |
| Mus musculus 16 days neonate cerebellum cDNA, RIKEN full-length enriched library, cQ8CBI8     | Q8CBI8 | 1  | 0.52  |    |       |   |      |    |        |
| Mus musculus 16 days neonate cerebellum cDNA, RIKEN full-length enriched library, cQ8BZB5     | Q8BZB5 | 2  | 3.29  |    |       |   |      | 1  | 1.19   |
| Mus musculus 16 days neonate cerebellum cDNA, RIKEN full-length enriched library, cQ8BI99     | Q8BI99 |    |       |    |       |   |      | 1  | 1.43   |
| Mus musculus 16 days neonate cerebellum cDNA, RIKEN full-length enriched library, cQ8CBE7     | Q8CBE7 |    |       | 1  | 2.29  |   |      |    |        |
| Mus musculus 16 days neonate cerebellum cDNA, RIKEN full-length enriched library, cQ8BV92     | Q8BV92 | 1  | 1.36  |    |       |   |      |    |        |
| Mus musculus 16 days neonate cerebellum cDNA, RIKEN full-length enriched library, cQ8C570     | Q8C570 | 1  | 0.34  |    |       |   |      | 1  | 0.94   |
| Mus musculus 16 days neonate cerebellum cDNA, RIKEN full-length enriched library, cQ8CBC7     | Q8CBC7 | 2  | 5.91  |    |       |   |      |    |        |
| Mus musculus 16 days neonate cerebellum cDNA, RIKEN full-length enriched library, cQ8CBC4     | Q8CBC4 |    |       |    |       |   |      | 1  | 1.49   |
| Mus musculus 16 days neonate thymus cDNA, RIKEN full-length enriched library, cQ8BYW9         | Q8BYW9 |    |       |    |       | 1 | 2.19 |    |        |
| Mus musculus 16 days neonate thymus cDNA, RIKEN full-length enriched library, cQ8CAQ2         | Q8CAQ2 | 1  | 1.68  |    |       |   |      |    |        |
| Mus musculus 18-day embryo whole body cDNA, RIKEN full-length enriched library, cQ8BTE5       | Q8BTE5 | 1  | 2.12  |    |       |   |      |    |        |
| Mus musculus 18-day embryo whole body cDNA, RIKEN full-length enriched library, cQ9CR43       | Q9CR43 | 1  | 0.05  | 1  | 0.03  |   |      |    |        |
| Mus musculus 18-day embryo whole body cDNA, RIKEN full-length enriched library, cQ9D1P4       | Q9D1P4 |    |       |    |       |   |      | 2  | 0.92   |
| Mus musculus 18-day embryo whole body cDNA, RIKEN full-length enriched library, cQ9D1M4       | Q9D1M4 | 1  | 0.67  | 2  | 0.72  | 1 | 2.05 | 1  | 0.29   |
| Mus musculus 18-day embryo whole body cDNA, RIKEN full-length enriched library, cQ9D116       | Q9D116 |    |       | 1  | 1.71  |   |      |    |        |
| Mus musculus 18-day embryo whole body cDNA, RIKEN full-length enriched library, cQ9D1H8       | Q9D1H8 |    |       |    |       |   |      | 1  | 23.39  |
| Mus musculus 18-day embryo whole body cDNA, RIKEN full-length enriched library, cQ9D1F4       | Q9D1F4 | 2  | 1.06  |    |       |   |      |    |        |
| Mus musculus 18-day embryo whole body cDNA, RIKEN full-length enriched library, cQ9D1D6       | Q9D1D6 | 2  | 1.17  |    |       |   |      |    |        |
| Mus musculus 18-day embryo whole body cDNA, RIKEN full-length enriched library, cQ9D1C3       | Q9D1C3 |    |       | 2  | 1.44  |   |      | 4  | 1.02   |
| Mus musculus 18-day embryo whole body cDNA, RIKEN full-length enriched library, cQ9CR09       | Q9CR09 | 6  | 1.77  | 1  | 0.99  | 1 | 1.94 |    |        |
| Mus musculus 18-day embryo whole body cDNA, RIKEN full-length enriched library, cQ9D136       | Q9D136 | 2  | 0.84  | 1  | 1.34  |   |      |    |        |



|                                                                                                |        |    |      |    |       |    |      |    |      |
|------------------------------------------------------------------------------------------------|--------|----|------|----|-------|----|------|----|------|
| Mus musculus 18-day embryo whole body cDNA, RIKEN full-length enriched library, c Q9D115       | Q9D115 | 2  | 2.56 | 4  | 1.11  | 3  | 1.60 | 3  | 1.32 |
| Mus musculus 2 days neonate thymus thymic cells cDNA, RIKEN full-length enriched Q8BU33        | Q8BU33 | 3  | 1.79 | 1  | 0.83  |    |      | 4  | 1.43 |
| Mus musculus 2 days neonate thymus thymic cells cDNA, RIKEN full-length enriched Q8C2S1        | Q8C2S1 |    |      |    |       |    |      | 4  | 0.88 |
| Mus musculus 2 days neonate thymus thymic cells cDNA, RIKEN full-length enriched Q8C2Q9        | Q8C2Q9 | 1  | 0.77 | 3  | 2.47  | 2  | 1.70 | 6  | 1.41 |
| Mus musculus 2 days neonate thymus thymic cells cDNA, RIKEN full-length enriched Q8BTZ7        | Q8BTZ7 | 2  | 0.77 |    |       |    |      |    |      |
| Mus musculus 2 days neonate thymus thymic cells cDNA, RIKEN full-length enriched Q8BTX9        | Q8BTX9 |    |      | 1  | 0.02  |    |      | 1  | 1.39 |
| Mus musculus 2 days neonate thymus thymic cells cDNA, RIKEN full-length enriched Q8C2J9        | Q8C2J9 | 2  | 1.01 | 3  | 1.00  |    |      |    |      |
| Mus musculus 2 days neonate thymus thymic cells cDNA, RIKEN full-length enriched Q8BTW3        | Q8BTW3 | 1  | 1.45 | 1  | 0.28  |    |      |    |      |
| Mus musculus 2 days neonate thymus thymic cells cDNA, RIKEN full-length enriched Q8BTV2        | Q8BTV2 |    |      | 2  | 1.44  |    |      |    |      |
| Mus musculus 2 days neonate thymus thymic cells cDNA, RIKEN full-length enriched Q8C2F8        | Q8C2F8 | 1  | 2.39 |    |       | 2  | 1.64 |    |      |
| Mus musculus 2 days neonate thymus thymic cells cDNA, RIKEN full-length enriched Q8BTS9        | Q8BTS9 | 1  | 1.13 | 1  | 1.24  | 1  | 2.45 | 3  | 2.79 |
| Mus musculus 2 days pregnant adult female ovary cDNA, RIKEN full-length enriched Q8BW51        | Q8BW51 |    |      |    |       |    |      | 2  | 0.71 |
| Mus musculus 2 days pregnant adult female ovary cDNA, RIKEN full-length enriched Q8BIG7        | Q8BIG7 | 5  | 0.82 | 4  | 1.59  |    |      |    |      |
| Mus musculus 2 days pregnant adult female ovary cDNA, RIKEN full-length enriched Q8BW45        | Q8BW45 | 1  | 0.44 |    |       |    |      |    |      |
| Mus musculus 3 days neonate thymus cDNA, RIKEN full-length enriched library, clone: Q8BYA0     | Q8BYA0 | 5  | 1.41 | 9  | 1.34  | 1  | 0.79 | 7  | 1.51 |
| Mus musculus 3 days neonate thymus cDNA, RIKEN full-length enriched library, clone: Q8C9R1     | Q8C9R1 |    |      | 1  | 0.07  |    |      |    |      |
| Mus musculus 3 days neonate thymus cDNA, RIKEN full-length enriched library, clone: Q8BY71     | Q8BY71 | 5  | 1.23 | 8  | 0.97  | 4  | 1.36 | 2  | 1.56 |
| Mus musculus 3 days neonate thymus cDNA, RIKEN full-length enriched library, clone: Q8BFT0     | Q8BFT0 | 1  | 0.07 | 1  | 0.05  |    |      |    |      |
| Mus musculus 4 days neonate male adipose cDNA, RIKEN full-length enriched library Q8BJQ2       | Q8BJQ2 | 1  | 0.88 | 1  | 1.28  | 1  | 1.68 | 1  | 1.76 |
| Mus musculus 4 days neonate male adipose cDNA, RIKEN full-length enriched library Q8BJP5       | Q8BJP5 | 1  | 1.27 |    |       | 1  | 2.88 |    |      |
| Mus musculus 4 days neonate male adipose cDNA, RIKEN full-length enriched library Q8BIJ7       | Q8BIJ7 |    |      | 1  | 1.16  |    |      |    |      |
| Mus musculus 6 days embryo whole body cDNA, RIKEN full-length enriched library, c Q8BMK4       | Q8BMK4 | 4  | 2.96 | 5  | 1.26  | 1  | 1.09 | 1  | 1.01 |
| Mus musculus 6 days neonate head cDNA, RIKEN full-length enriched library, clone: Q8C0L8       | Q8C0L8 | 1  | 2.04 | 1  | 0.77  | 2  | 4.08 | 2  | 0.96 |
| Mus musculus 6 days neonate head cDNA, RIKEN full-length enriched library, clone: Q9D3L8       | Q9D3L8 |    |      | 1  | 0.05  |    |      |    |      |
| Mus musculus 7 days embryo whole body cDNA, RIKEN full-length enriched library, c Q8BKX3       | Q8BKX3 | 8  | 1.91 | 7  | 1.30  | 3  | 1.62 | 1  | 0.59 |
| Mus musculus 7 days embryo whole body cDNA, RIKEN full-length enriched library, c Q8BQI6       | Q8BQI6 |    |      |    |       |    |      | 2  | 1.23 |
| Mus musculus 7 days neonate cerebellum cDNA, RIKEN full-length enriched library, c Q8BJ14      | Q8BJ14 |    |      | 1  | 1.20  |    |      |    |      |
| Mus musculus 7 days neonate cerebellum cDNA, RIKEN full-length enriched library, c Q8BXX8      | Q8BXX8 |    |      | 1  | 17.86 |    |      |    |      |
| Mus musculus 7 days neonate cerebellum cDNA, RIKEN full-length enriched library, c Q8BXV2      | Q8BXV2 | 1  | 0.35 | 2  | 2.01  |    |      |    |      |
| Mus musculus 7 days neonate cerebellum cDNA, RIKEN full-length enriched library, c Q8C904      | Q8C904 |    |      | 1  | 3.42  |    |      |    |      |
| Mus musculus 7 days neonate cerebellum cDNA, RIKEN full-length enriched library, c Q8BTF0      | Q8BTF0 | 16 | 1.40 | 30 | 1.79  | 21 | 1.72 | 22 | 1.03 |
| Mus musculus 8 days embryo whole body cDNA, RIKEN full-length enriched library, c Q8BPA0       | Q8BPA0 |    |      | 1  | 0.04  |    |      |    |      |
| Mus musculus 8 days embryo whole body cDNA, RIKEN full-length enriched library, c Q8BIF9       | Q8BIF9 |    |      | 1  | 1.34  |    |      |    |      |
| Mus musculus 8 days embryo whole body cDNA, RIKEN full-length enriched library, c Q8BSS4       | Q8BSS4 | 3  | 4.39 | 3  | 10.94 | 1  | 1.45 | 1  | 1.07 |
| Mus musculus 8 days embryo whole body cDNA, RIKEN full-length enriched library, c Q8BK08       | Q8BK08 |    |      | 1  | 1.78  |    |      |    |      |
| Mus musculus 8 days embryo whole body cDNA, RIKEN full-length enriched library, c Q8BK04       | Q8BK04 | 6  | 3.35 | 4  | 2.25  | 2  | 0.85 | 3  | 0.94 |
| Mus musculus 8 days embryo whole body cDNA, RIKEN full-length enriched library, c Q8BSR8       | Q8BSR8 | 2  | 1.73 | 1  | 1.71  | 1  | 0.68 | 2  | 2.16 |
| Mus musculus 8 days embryo whole body cDNA, RIKEN full-length enriched library, c Q8BP56       | Q8BP56 |    |      | 1  | 1.08  | 1  | 1.66 | 1  | 1.15 |
| Mus musculus 8 days embryo whole body cDNA, RIKEN full-length enriched library, c Q8BFR4       | Q8BFR4 |    |      | 12 | 1.44  | 2  | 0.93 | 3  | 0.93 |
| Mus musculus 8 days embryo whole body cDNA, RIKEN full-length enriched library, c Q9CYA0       | Q9CYA0 | 9  | 2.66 | 17 | 2.91  | 5  | 1.25 | 19 | 1.07 |
| Mus musculus 8 days embryo whole body cDNA, RIKEN full-length enriched library, c Q9CS15       | Q9CS15 | 2  | 1.69 |    |       |    |      |    |      |
| Mus musculus 8 days embryo whole body cDNA, RIKEN full-length enriched library, c Q8BSQ9       | Q8BSQ9 | 1  | 0.45 | 2  | 2.18  |    |      |    |      |
| Mus musculus 9 days embryo whole body cDNA, RIKEN full-length enriched library, c Q8BNL1       | Q8BNL1 | 1  | 0.81 |    |       |    |      |    |      |
| Mus musculus 9 days embryo whole body cDNA, RIKEN full-length enriched library, c Q8BKT7       | Q8BKT7 | 2  | 0.80 |    |       |    |      |    |      |
| Mus musculus 9 days embryo whole body cDNA, RIKEN full-length enriched library, c Q8BHB4       | Q8BHB4 |    |      | 1  | 2.50  |    |      |    |      |
| Mus musculus 9 days embryo whole body cDNA, RIKEN full-length enriched library, c Q8BKT3       | Q8BKT3 |    |      | 1  | 2.49  |    |      |    |      |
| Mus musculus 9 days embryo whole body cDNA, RIKEN full-length enriched library, c Q8BH24       | Q8BH24 | 10 | 1.60 | 9  | 1.57  | 5  | 1.16 | 10 | 1.19 |
| Mus musculus 9 days embryo whole body cDNA, RIKEN full-length enriched library, c Q8BHC4       | Q8BHC4 | 2  | 0.91 | 1  | 0.84  | 1  | 0.88 |    |      |
| Mus musculus 9 days embryo whole body cDNA, RIKEN full-length enriched library, c Q8BJI6       | Q8BJI6 |    |      | 2  | 0.91  |    |      |    |      |
| Mus musculus 9.5 days embryo parthenogenote cDNA, RIKEN full-length enriched lib Q8BLJ4        | Q8BLJ4 |    |      | 1  | 4.02  |    |      |    |      |
| Mus musculus 9.5 days embryo parthenogenote cDNA, RIKEN full-length enriched lib Q8BHS3        | Q8BHS3 |    |      | 1  | 0.65  |    |      | 3  | 0.82 |
| Mus musculus 9.5 days embryo parthenogenote cDNA, RIKEN full-length enriched lib Q8BLH4        | Q8BLH4 |    |      | 1  | 2.13  |    |      |    |      |
| Mus musculus 9.5 days embryo parthenogenote cDNA, RIKEN full-length enriched lib Q8BLH1        | Q8BLH1 |    |      | 2  | 0.34  | 3  | 1.13 | 5  | 0.70 |
| Mus musculus 9.5 days embryo parthenogenote cDNA, RIKEN full-length enriched lib Q8BLH0        | Q8BLH0 | 2  | 1.52 | 4  | 1.58  | 1  | 1.45 | 6  | 1.23 |
| Mus musculus activated spleen cDNA, RIKEN full-length enriched library, clone: F830: Q8BJA0    | Q8BJA0 |    |      |    |       |    |      | 2  | 1.03 |
| Mus musculus adult female placenta cDNA, RIKEN full-length enriched library, clone: Q9DAU1     | Q9DAU1 | 2  | 1.12 | 3  | 1.07  |    |      | 1  | 0.22 |
| Mus musculus adult female vagina cDNA, RIKEN full-length enriched library, clone: 99: Q8BZ03   | Q8BZ03 |    |      | 1  | 1.00  |    |      | 1  | 6.40 |
| Mus musculus adult male adrenal gland cDNA, RIKEN full-length enriched library, clone: Q8C8M5  | Q8C8M5 | 1  | 6.40 |    |       |    |      |    |      |
| Mus musculus adult male aorta and vein cDNA, RIKEN full-length enriched library, clone: Q8BFW7 | Q8BFW7 | 4  | 1.57 | 5  | 1.65  |    |      | 2  | 0.81 |
| Mus musculus adult male aorta and vein cDNA, RIKEN full-length enriched library, clone: Q8BS06 | Q8BS06 |    |      |    |       |    |      | 1  | 1.20 |
| Mus musculus adult male aorta and vein cDNA, RIKEN full-length enriched library, clone: Q8BLY2 | Q8BLY2 |    |      | 2  | 0.57  |    |      |    |      |

|                                                                                             |        |   |      |    |      |   |      |   |       |
|---------------------------------------------------------------------------------------------|--------|---|------|----|------|---|------|---|-------|
| Mus musculus adult male aorta and vein cDNA, RIKEN full-length enriched library, clc Q8BJS7 | Q8BJS7 |   |      | 1  | 0.40 |   |      |   |       |
| Mus musculus adult male aorta and vein cDNA, RIKEN full-length enriched library, clc Q8BLX7 | Q8BLX7 | 2 | 1.43 | 3  | 1.71 | 2 | 0.77 | 3 | 0.60  |
| Mus musculus adult male aorta and vein cDNA, RIKEN full-length enriched library, clc Q8BRZ1 | Q8BRZ1 |   |      | 2  | 1.14 |   |      | 1 | 0.36  |
| Mus musculus adult male aorta and vein cDNA, RIKEN full-length enriched library, clc Q8BNV2 | Q8BNV2 |   |      | 1  | 0.07 |   |      |   |       |
| Mus musculus adult male aorta and vein cDNA, RIKEN full-length enriched library, clc Q8BRX6 | Q8BRX6 |   |      | 1  | 0.93 |   |      |   |       |
| Mus musculus adult male aorta and vein cDNA, RIKEN full-length enriched library, clc Q8BLU0 | Q8BLU0 |   |      |    |      |   |      | 2 | 0.98  |
| Mus musculus adult male bone cDNA, RIKEN full-length enriched library, clone:98301Q8CBA6    | Q8CBA6 |   |      |    |      |   |      | 1 | 0.97  |
| Mus musculus adult male bone cDNA, RIKEN full-length enriched library, clone:98301Q8BZ47    | Q8BZ47 |   |      |    |      | 1 | 3.43 | 1 | 3.62  |
| Mus musculus adult male bone cDNA, RIKEN full-length enriched library, clone:98301Q8BZ40    | Q8BZ40 | 1 | 0.65 |    |      |   |      |   |       |
| Mus musculus adult male cecum cDNA, RIKEN full-length enriched library, clone:913(Q9D279    | Q9D279 |   |      |    |      |   |      | 1 | 0.38  |
| Mus musculus adult male cecum cDNA, RIKEN full-length enriched library, clone:913(Q8CC80    | Q8CC80 |   |      |    |      | 1 | 1.09 | 1 | 1.28  |
| Mus musculus adult male cerebellum cDNA, RIKEN full-length enriched library, clone:Q9DB98   | Q9DB98 |   |      | 2  | 1.73 |   |      | 2 | 1.65  |
| Mus musculus adult male cerebellum cDNA, RIKEN full-length enriched library, clone:Q9DB91   | Q9DB91 | 1 | 1.28 | 3  | 1.99 | 2 | 1.28 | 3 | 1.92  |
| Mus musculus adult male cerebellum cDNA, RIKEN full-length enriched library, clone:Q9DB73   | Q9DB73 | 1 | 1.47 | 4  | 1.52 |   |      |   |       |
| Mus musculus adult male cerebellum cDNA, RIKEN full-length enriched library, clone:Q9D2U6   | Q9D2U6 | 2 | 1.90 | 1  | 1.46 | 1 | 1.71 |   |       |
| Mus musculus adult male cerebellum cDNA, RIKEN full-length enriched library, clone:Q9DB29   | Q9DB29 | 3 | 2.32 |    |      |   |      | 1 | 0.56  |
| Mus musculus adult male cerebellum cDNA, RIKEN full-length enriched library, clone:Q9DB28   | Q9DB28 |   |      |    |      | 1 | 1.01 | 1 | 1.07  |
| Mus musculus adult male colon cDNA, RIKEN full-length enriched library, clone:9030(Q8BGT5   | Q8BGT5 | 1 | 0.92 | 2  | 1.22 |   |      |   |       |
| Mus musculus adult male colon cDNA, RIKEN full-length enriched library, clone:9030(Q8C5C9   | Q8C5C9 |   |      | 1  | 0.16 |   |      |   |       |
| Mus musculus adult male colon cDNA, RIKEN full-length enriched library, clone:9030(Q8BIW7   | Q8BIW7 |   |      |    |      |   |      | 1 | 0.30  |
| Mus musculus adult male corpora quadrigemina cDNA, RIKEN full-length enriched lib Q8BLE5    | Q8BLE5 | 2 | 0.49 | 3  | 1.63 | 2 | 0.71 | 3 | 2.14  |
| Mus musculus adult male corpora quadrigemina cDNA, RIKEN full-length enriched lib Q9CPW2    | Q9CPW2 |   |      | 1  | 1.27 |   |      |   |       |
| Mus musculus adult male corpora quadrigemina cDNA, RIKEN full-length enriched lib Q8BLD5    | Q8BLD5 | 1 | 1.67 | 1  | 1.13 |   |      | 1 | 0.85  |
| Mus musculus adult male corpora quadrigemina cDNA, RIKEN full-length enriched lib Q8BHR9    | Q8BHR9 |   |      |    |      |   |      | 1 | 1.37  |
| Mus musculus adult male corpora quadrigemina cDNA, RIKEN full-length enriched lib Q8BR49    | Q8BR49 | 1 | 0.86 | 1  | 1.16 |   |      |   |       |
| Mus musculus adult male corpora quadrigemina cDNA, RIKEN full-length enriched lib Q8BR00    | Q8BR00 |   |      | 1  | 3.57 |   |      |   |       |
| Mus musculus adult male corpora quadrigemina cDNA, RIKEN full-length enriched lib Q8BQY9    | Q8BQY9 |   |      | 1  | 0.59 |   |      |   |       |
| Mus musculus adult male corpora quadrigemina cDNA, RIKEN full-length enriched lib Q8BFW6    | Q8BFW6 | 1 | 1.07 |    |      |   |      | 1 | 0.41  |
| Mus musculus adult male corpora quadrigemina cDNA, RIKEN full-length enriched lib Q8BL38    | Q8BL38 | 1 | 0.93 | 2  | 1.42 | 2 | 1.07 | 1 | 1.48  |
| Mus musculus adult male corpus striatum cDNA, RIKEN full-length enriched library, clQ8BNN3  | Q8BNN3 | 2 | 0.81 | 1  | 1.00 |   |      |   |       |
| Mus musculus adult male corpus striatum cDNA, RIKEN full-length enriched library, clQ8BKY8  | Q8BKY8 | 1 | 0.02 | 1  | 1.08 |   |      |   |       |
| Mus musculus adult male diencephalon cDNA, RIKEN full-length enriched library, clor Q8CBY8  | Q8CBY8 | 2 | 3.12 | 2  | 1.31 | 3 | 1.75 | 1 | 1.60  |
| Mus musculus adult male diencephalon cDNA, RIKEN full-length enriched library, clor Q8CBY3  | Q8CBY3 | 1 | 2.45 | 1  | 2.60 |   |      | 3 | 0.87  |
| Mus musculus adult male hippocampus cDNA, RIKEN full-length enriched library, clor Q8CEG9   | Q8CEG9 |   |      |    |      |   |      | 1 | 11.97 |
| Mus musculus adult male hippocampus cDNA, RIKEN full-length enriched library, clor Q8BIV0   | Q8BIV0 |   |      |    |      | 1 | 3.70 |   |       |
| Mus musculus adult male hypothalamus cDNA, RIKEN full-length enriched library, clo Q8BYR8   | Q8BYR8 |   |      | 1  | 0.07 |   |      |   |       |
| Mus musculus adult male hypothalamus cDNA, RIKEN full-length enriched library, clo Q8CAL0   | Q8CAL0 | 8 | 1.15 | 10 | 1.55 | 9 | 0.94 | 4 | 1.37  |
| Mus musculus adult male hypothalamus cDNA, RIKEN full-length enriched library, clo Q8CAK8   | Q8CAK8 | 2 | 1.54 | 1  | 0.26 |   |      |   |       |
| Mus musculus adult male hypothalamus cDNA, RIKEN full-length enriched library, clo Q8C547   | Q8C547 | 2 | 1.60 | 3  | 1.76 |   |      |   |       |
| Mus musculus adult male hypothalamus cDNA, RIKEN full-length enriched library, clo Q8BV79   | Q8BV79 |   |      |    |      |   |      | 1 | 0.02  |
| Mus musculus adult male hypothalamus cDNA, RIKEN full-length enriched library, clo Q8CAE2   | Q8CAE2 |   |      |    |      |   |      | 1 | 0.91  |
| Mus musculus adult male hypothalamus cDNA, RIKEN full-length enriched library, clo Q8CAA7   | Q8CAA7 |   |      | 1  | 4.95 |   |      | 1 | 13.45 |
| Mus musculus adult male kidney cDNA, RIKEN full-length enriched library, clone:061(Q9DCM0   | Q9DCM0 |   |      | 1  | 1.22 |   |      | 1 | 1.13  |
| Mus musculus adult male kidney cDNA, RIKEN full-length enriched library, clone:061(Q9DCH6   | Q9DCH6 |   |      | 1  | 3.17 |   |      | 2 | 1.05  |
| Mus musculus adult male kidney cDNA, RIKEN full-length enriched library, clone:061(Q6ZWZ6   | Q6ZWZ6 | 4 | 1.41 | 4  | 1.22 |   |      | 2 | 1.39  |
| Mus musculus adult male kidney cDNA, RIKEN full-length enriched library, clone:061(Q9DCE5   | Q9DCE5 |   |      |    |      |   |      | 2 | 1.41  |
| Mus musculus adult male liver cDNA, RIKEN full-length enriched library, clone:13000(Q9DBN5  | Q9DBN5 | 3 | 1.03 | 1  | 1.29 |   |      |   |       |
| Mus musculus adult male liver cDNA, RIKEN full-length enriched library, clone:13000(Q8BHL7  | Q8BHL7 | 1 | 1.24 | 3  | 1.34 | 2 | 1.29 | 2 | 1.39  |
| Mus musculus adult male liver cDNA, RIKEN full-length enriched library, clone:13000(Q9DBG6  | Q9DBG6 |   |      | 1  | 1.15 |   |      |   |       |
| Mus musculus adult male liver cDNA, RIKEN full-length enriched library, clone:13000(Q9DBD5  | Q9DBD5 |   |      | 1  | 0.48 | 2 | 0.48 | 5 | 1.13  |
| Mus musculus adult male lung cDNA, RIKEN full-length enriched library, clone:12000(Q9DC22   | Q9DC22 |   |      |    |      |   |      | 1 | 3.67  |
| Mus musculus adult male lung cDNA, RIKEN full-length enriched library, clone:12000(Q9DC20   | Q9DC20 |   |      |    |      | 1 | 0.51 | 2 | 0.75  |
| Mus musculus adult male lung cDNA, RIKEN full-length enriched library, clone:12000(Q9DC03   | Q9DC03 |   |      |    |      |   |      | 1 | 1.48  |
| Mus musculus adult male lung cDNA, RIKEN full-length enriched library, clone:12000(Q9DBZ9   | Q9DBZ9 |   |      | 1  | 2.06 |   |      | 2 | 0.75  |
| Mus musculus adult male lung cDNA, RIKEN full-length enriched library, clone:12000(Q9DBW3   | Q9DBW3 |   |      |    |      | 1 | 0.14 |   |       |
| Mus musculus adult male lung cDNA, RIKEN full-length enriched library, clone:12000(Q9DBT5   | Q9DBT5 | 2 | 4.61 | 2  | 0.97 |   |      | 1 | 1.62  |
| Mus musculus adult male lung cDNA, RIKEN full-length enriched library, clone:12000(Q9DBR0   | Q9DBR0 | 2 | 2.22 | 4  | 3.56 | 2 | 1.74 | 4 | 4.17  |
| Mus musculus adult male medulla oblongata cDNA, RIKEN full-length enriched library Q8CCW3   | Q8CCW3 |   |      |    |      |   |      | 1 | 2.32  |
| Mus musculus adult male medulla oblongata cDNA, RIKEN full-length enriched library Q8CCV9   | Q8CCV9 |   |      |    |      | 1 | 2.21 |   |       |
| Mus musculus adult male medulla oblongata cDNA, RIKEN full-length enriched library Q8BG02   | Q8BG02 |   |      | 1  | 0.30 |   |      |   |       |
| Mus musculus adult male medulla oblongata cDNA, RIKEN full-length enriched library Q8C075   | Q8C075 | 1 | 0.15 | 1  | 0.31 |   |      |   |       |

|                                                                                              |        |   |       |   |        |    |      |   |      |  |  |
|----------------------------------------------------------------------------------------------|--------|---|-------|---|--------|----|------|---|------|--|--|
| Mus musculus adult male medulla oblongata cDNA, RIKEN full-length enriched library Q8C5K5    | Q8C5K5 | 2 | 2.09  | 1 | 1.42   |    |      |   |      |  |  |
| Mus musculus adult male medulla oblongata cDNA, RIKEN full-length enriched library Q8BMF4    | Q8BMF4 | 6 | 1.05  | 5 | 1.01   | 6  | 0.96 |   |      |  |  |
| Mus musculus adult male olfactory brain cDNA, RIKEN full-length enriched library, clc Q8C052 | Q8C052 | 2 | 1.53  | 3 | 1.24   | 1  | 1.62 | 2 | 1.11 |  |  |
| Mus musculus adult male olfactory brain cDNA, RIKEN full-length enriched library, clc Q8BH70 | Q8BH70 | 1 | 2.63  |   |        |    |      |   |      |  |  |
| Mus musculus adult male olfactory brain cDNA, RIKEN full-length enriched library, clc Q8C518 | Q8C518 |   |       | 1 | 1.30   |    |      |   |      |  |  |
| Mus musculus adult male olfactory brain cDNA, RIKEN full-length enriched library, clc Q8C020 | Q8C020 |   |       |   |        | 1  | 0.64 |   |      |  |  |
| Mus musculus adult male pituitary gland cDNA, RIKEN full-length enriched library, clc Q8BSV7 | Q8BSV7 |   |       |   |        |    |      | 1 | 1.61 |  |  |
| Mus musculus adult male pituitary gland cDNA, RIKEN full-length enriched library, clc Q8BSV0 | Q8BSV0 | 1 | 12.99 |   |        |    |      |   |      |  |  |
| Mus musculus adult male pituitary gland cDNA, RIKEN full-length enriched library, clc Q9CQ26 | Q9CQ26 | 1 | 1.26  | 3 | 2.34   |    |      |   |      |  |  |
| Mus musculus adult male pituitary gland cDNA, RIKEN full-length enriched library, clc Q8BML9 | Q8BML9 | 4 | 1.67  | 3 | 1.84   | 2  | 1.55 | 4 | 0.78 |  |  |
| Mus musculus adult male pituitary gland cDNA, RIKEN full-length enriched library, clc Q8BML4 | Q8BML4 |   |       |   |        |    |      | 1 | 0.08 |  |  |
| Mus musculus adult male pituitary gland cDNA, RIKEN full-length enriched library, clc Q8BH60 | Q8BH60 | 1 | 0.71  | 1 | 1.58   |    |      | 1 | 1.20 |  |  |
| Mus musculus adult male small intestine cDNA, RIKEN full-length enriched library, clc Q9D8H7 | Q9D8H7 |   |       | 2 | 0.98   |    |      | 1 | 1.09 |  |  |
| Mus musculus adult male small intestine cDNA, RIKEN full-length enriched library, clc Q8BGD8 | Q8BGD8 | 2 | 1.50  | 1 | 0.98   |    |      |   |      |  |  |
| Mus musculus adult male small intestine cDNA, RIKEN full-length enriched library, clc Q9D8F0 | Q9D8F0 |   |       |   |        |    |      | 1 | 0.85 |  |  |
| Mus musculus adult male small intestine cDNA, RIKEN full-length enriched library, clc Q8C1P7 | Q8C1P7 |   |       |   |        |    |      | 1 | 0.88 |  |  |
| Mus musculus adult male small intestine cDNA, RIKEN full-length enriched library, clc Q78XM1 | Q78XM1 |   |       |   |        |    |      | 1 | 2.81 |  |  |
| Mus musculus adult male small intestine cDNA, RIKEN full-length enriched library, clc Q9CR98 | Q9CR98 | 1 | 1.62  | 3 | 1.78   | 1  | 8.67 | 6 | 0.79 |  |  |
| Mus musculus adult male small intestine cDNA, RIKEN full-length enriched library, clc Q9D820 | Q9D820 | 2 | 1.40  | 1 | 0.98   | 3  | 2.41 | 1 | 1.64 |  |  |
| Mus musculus adult male spinal cord cDNA, RIKEN full-length enriched library, clone: Q8BY16  | Q8BY16 |   |       | 2 | 1.65   |    |      |   |      |  |  |
| Mus musculus adult male spinal cord cDNA, RIKEN full-length enriched library, clone: Q8CA71  | Q8CA71 | 1 | 1.14  | 1 | 0.94   | 1  | 0.85 | 2 | 0.91 |  |  |
| Mus musculus adult male spinal cord cDNA, RIKEN full-length enriched library, clone: Q8BYH8  | Q8BYH8 |   |       | 1 | 0.04   |    |      |   |      |  |  |
| Mus musculus adult male spinal cord cDNA, RIKEN full-length enriched library, clone: Q8BYH4  | Q8BYH4 |   |       | 1 | 0.79   |    |      |   |      |  |  |
| Mus musculus adult male spleen cDNA, RIKEN full-length enriched library, clone:0911 Q9DC82   | Q9DC82 | 1 | 12.73 |   |        |    |      |   |      |  |  |
| Mus musculus adult male stomach cDNA, RIKEN full-length enriched library, clone:22 Q8BW00    | Q8BW00 |   |       |   |        |    |      | 1 | 1.40 |  |  |
| Mus musculus adult male stomach cDNA, RIKEN full-length enriched library, clone:22 Q9D7X2    | Q9D7X2 |   |       |   |        |    |      | 1 | 0.75 |  |  |
| Mus musculus adult male stomach cDNA, RIKEN full-length enriched library, clone:22 Q9CVB6    | Q9CVB6 | 6 | 1.05  | 5 | 0.95   | 1  | 1.25 | 2 | 1.42 |  |  |
| Mus musculus adult male stomach cDNA, RIKEN full-length enriched library, clone:22 Q9D2R0    | Q9D2R0 | 4 | 1.71  | 4 | 1.51   |    |      | 6 | 1.27 |  |  |
| Mus musculus adult male testis cDNA, RIKEN full-length enriched library, clone:1700 Q9DAQ4   | Q9DAQ4 | 1 | 3.23  |   |        |    |      |   |      |  |  |
| Mus musculus adult male testis cDNA, RIKEN full-length enriched library, clone:1700 Q8BW10   | Q8BW10 |   |       |   |        |    |      | 1 | 1.19 |  |  |
| Mus musculus adult male testis cDNA, RIKEN full-length enriched library, clone:1700 Q9D9Z5   | Q9D9Z5 |   |       | 2 | 1.55   |    |      | 1 | 1.71 |  |  |
| Mus musculus adult male testis cDNA, RIKEN full-length enriched library, clone:1700 Q9D9Z1   | Q9D9Z1 | 2 | 1.09  |   |        |    |      |   |      |  |  |
| Mus musculus adult male testis cDNA, RIKEN full-length enriched library, clone:1700 Q9D9W9   | Q9D9W9 |   |       | 1 | 1.41   |    |      | 4 | 2.81 |  |  |
| Mus musculus adult male testis cDNA, RIKEN full-length enriched library, clone:1700 Q9D9B7   | Q9D9B7 | 1 | 0.34  |   |        |    |      |   |      |  |  |
| Mus musculus adult male testis cDNA, RIKEN full-length enriched library, clone:4921 Q9D5Y7   | Q9D5Y7 | 5 | 1.10  | 6 | 1.01   | 2  | 0.80 | 2 | 0.95 |  |  |
| Mus musculus adult male testis cDNA, RIKEN full-length enriched library, clone:4921 Q8BK54   | Q8BK54 | 6 | 1.34  | 9 | 1.63   | 10 | 1.37 | 6 | 1.17 |  |  |
| Mus musculus adult male testis cDNA, RIKEN full-length enriched library, clone:4921 Q8C650   | Q8C650 |   |       |   |        |    |      | 1 | 1.01 |  |  |
| Mus musculus adult male testis cDNA, RIKEN full-length enriched library, clone:4921 Q9D5T0   | Q9D5T0 | 4 | 1.14  | 3 | 1.71   |    |      |   |      |  |  |
| Mus musculus adult male testis cDNA, RIKEN full-length enriched library, clone:4930 Q9CUQ5   | Q9CUQ5 | 2 | 1.06  | 3 | 0.63   | 4  | 0.70 | 5 | 0.83 |  |  |
| Mus musculus adult male testis cDNA, RIKEN full-length enriched library, clone:4930 Q9CUQ2   | Q9CUQ2 |   |       |   |        |    |      | 1 | 0.45 |  |  |
| Mus musculus adult male testis cDNA, RIKEN full-length enriched library, clone:4930 Q8C612   | Q8C612 | 1 | 0.40  |   |        |    |      |   |      |  |  |
| Mus musculus adult male testis cDNA, RIKEN full-length enriched library, clone:4930 Q8BVR6   | Q8BVR6 |   |       | 1 | 2.51   |    |      | 1 | 1.41 |  |  |
| Mus musculus adult male testis cDNA, RIKEN full-length enriched library, clone:4930 Q9CQ62   | Q9CQ62 |   |       | 2 | 1.11   |    |      |   |      |  |  |
| Mus musculus adult male testis cDNA, RIKEN full-length enriched library, clone:4930 Q8C0V7   | Q8C0V7 |   |       |   |        |    |      | 1 | 0.26 |  |  |
| Mus musculus adult male testis cDNA, RIKEN full-length enriched library, clone:4930 Q9D2G7   | Q9D2G7 | 1 | 0.95  |   |        |    |      |   |      |  |  |
| Mus musculus adult male testis cDNA, RIKEN full-length enriched library, clone:4930 Q8C1G8   | Q8C1G8 | 1 | 2.11  |   |        |    |      |   |      |  |  |
| Mus musculus adult male testis cDNA, RIKEN full-length enriched library, clone:4930 Q9D4Y6   | Q9D4Y6 |   |       |   |        | 1  | 1.34 |   |      |  |  |
| Mus musculus adult male testis cDNA, RIKEN full-length enriched library, clone:4930 Q9D2F6   | Q9D2F6 | 1 | 1.21  | 1 | 0.83   |    |      |   |      |  |  |
| Mus musculus adult male testis cDNA, RIKEN full-length enriched library, clone:4930 Q9D4S5   | Q9D4S5 |   |       |   |        |    |      | 1 | 3.52 |  |  |
| Mus musculus adult male testis cDNA, RIKEN full-length enriched library, clone:4930 Q8CDP0   | Q8CDP0 | 2 | 1.44  |   |        |    |      |   |      |  |  |
| Mus musculus adult male testis cDNA, RIKEN full-length enriched library, clone:4930 Q8CDN2   | Q8CDN2 |   |       |   |        | 1  | 0.28 |   |      |  |  |
| Mus musculus adult male testis cDNA, RIKEN full-length enriched library, clone:4930 Q9D4P9   | Q9D4P9 | 1 | 1.81  |   |        |    |      |   |      |  |  |
| Mus musculus adult male testis cDNA, RIKEN full-length enriched library, clone:4931 Q9D4M2   | Q9D4M2 |   |       |   |        |    |      | 1 | 0.11 |  |  |
| Mus musculus adult male testis cDNA, RIKEN full-length enriched library, clone:4931 Q8CDM8   | Q8CDM8 | 1 | 0.64  | 5 | 1.81   |    |      | 2 | 0.99 |  |  |
| Mus musculus adult male testis cDNA, RIKEN full-length enriched library, clone:4931 Q9D2D7   | Q9D2D7 |   |       | 1 | 0.01   |    |      |   |      |  |  |
| Mus musculus adult male testis cDNA, RIKEN full-length enriched library, clone:4931 Q9D417   | Q9D417 |   |       |   |        | 1  | 2.44 |   |      |  |  |
| Mus musculus adult male testis cDNA, RIKEN full-length enriched library, clone:4932 Q9D411   | Q9D411 |   |       | 1 | 0.18   |    |      |   |      |  |  |
| Mus musculus adult male testis cDNA, RIKEN full-length enriched library, clone:4932 Q8C0R9   | Q8C0R9 |   |       | 1 | 16.41  |    |      |   |      |  |  |
| Mus musculus adult male testis cDNA, RIKEN full-length enriched library, clone:4932 Q8CDI4   | Q8CDI4 |   |       |   |        |    |      | 1 | 0.88 |  |  |
| Mus musculus adult male testis cDNA, RIKEN full-length enriched library, clone:4932 Q8C0R2   | Q8C0R2 |   |       | 1 | 144.71 |    |      |   |      |  |  |
| Mus musculus adult male testis cDNA, RIKEN full-length enriched library, clone:4932 Q8C0Q6   | Q8C0Q6 |   |       | 1 | 1.91   |    |      |   |      |  |  |

|                                                                                              |        |   |       |   |      |   |       |  |   |      |
|----------------------------------------------------------------------------------------------|--------|---|-------|---|------|---|-------|--|---|------|
| Mus musculus adult male testis cDNA, RIKEN full-length enriched library, clone:4932-Q8BH57   | Q8BH57 | 1 | 1.00  | 1 | 2.17 |   |       |  |   |      |
| Mus musculus adult male testis cDNA, RIKEN full-length enriched library, clone:4932-Q8CDG9   | Q8CDG9 | 1 | 1.57  |   |      | 1 | 0.98  |  | 1 | 1.10 |
| Mus musculus adult male testis cDNA, RIKEN full-length enriched library, clone:4932-Q8CDF9   | Q8CDF9 | 9 | 2.06  | 9 | 1.32 | 5 | 1.21  |  | 7 | 1.23 |
| Mus musculus adult male testis cDNA, RIKEN full-length enriched library, clone:4932-Q8C0P0   | Q8C0P0 |   |       | 1 | 2.27 |   |       |  |   |      |
| Mus musculus adult male testis cDNA, RIKEN full-length enriched library, clone:4933-Q8BVP1   | Q8BVP1 |   |       | 1 | 1.08 |   |       |  |   |      |
| Mus musculus adult male testis cDNA, RIKEN full-length enriched library, clone:4933-Q9D4A6   | Q9D4A6 | 1 | 1.20  | 2 | 1.45 | 1 | 1.02  |  |   |      |
| Mus musculus adult male testis cDNA, RIKEN full-length enriched library, clone:4933-Q9CUD3   | Q9CUD3 |   |       | 1 | 2.77 |   |       |  |   |      |
| Mus musculus adult male testis cDNA, RIKEN full-length enriched library, clone:4933-Q9D470   | Q9D470 | 1 | 0.82  |   |      |   |       |  |   |      |
| Mus musculus adult male testis cDNA, RIKEN full-length enriched library, clone:4933-Q8BVN4   | Q8BVN4 |   |       |   |      |   |       |  | 2 | 0.87 |
| Mus musculus adult male testis cDNA, RIKEN full-length enriched library, clone:4933-Q9CPQ9   | Q9CPQ9 | 5 | 1.42  | 9 | 1.41 | 3 | 1.77  |  | 8 | 1.60 |
| Mus musculus adult male testis cDNA, RIKEN full-length enriched library, clone:4933-Q8C0N0   | Q8C0N0 |   |       |   |      | 1 | 1.10  |  |   |      |
| Mus musculus adult male testis cDNA, RIKEN full-length enriched library, clone:4933-Q9D404   | Q9D404 | 2 | 1.24  | 3 | 1.42 |   |       |  |   |      |
| Mus musculus adult male testis cDNA, RIKEN full-length enriched library, clone:4933-Q9CRC1   | Q9CRC1 |   |       |   |      |   |       |  | 1 | 1.85 |
| Mus musculus adult male thymus cDNA, RIKEN full-length enriched library, clone:583-Q8BVL2    | Q8BVL2 | 1 | 1.54  | 3 | 3.71 |   |       |  | 1 | 1.36 |
| Mus musculus adult male thymus cDNA, RIKEN full-length enriched library, clone:583-Q8C011    | Q8C011 | 6 | 1.63  | 5 | 1.35 | 1 | 1.17  |  |   |      |
| Mus musculus adult male tongue cDNA, RIKEN full-length enriched library, clone:230-Q9D7P6    | Q9D7P6 |   |       | 1 | 3.32 |   |       |  | 1 | 0.61 |
| Mus musculus adult male tongue cDNA, RIKEN full-length enriched library, clone:231-Q9CPS7    | Q9CPS7 |   |       | 1 | 0.78 |   |       |  |   |      |
| Mus musculus adult male tongue cDNA, RIKEN full-length enriched library, clone:231-Q9CR13    | Q9CR13 |   |       |   |      |   |       |  | 1 | 0.84 |
| Mus musculus adult male tongue cDNA, RIKEN full-length enriched library, clone:231-Q9D7F5    | Q9D7F5 | 1 | 11.21 |   |      |   |       |  |   |      |
| Mus musculus adult male tongue cDNA, RIKEN full-length enriched library, clone:231-Q9D7A8    | Q9D7A8 | 1 | 1.67  |   |      |   |       |  | 2 | 0.88 |
| Mus musculus adult male tongue cDNA, RIKEN full-length enriched library, clone:231-Q9CRA2    | Q9CRA2 | 2 | 1.68  |   |      | 1 | 1.52  |  |   |      |
| Mus musculus adult male tongue cDNA, RIKEN full-length enriched library, clone:231-Q9D773    | Q9D773 | 1 | 1.61  |   |      |   |       |  |   |      |
| Mus musculus adult male tongue cDNA, RIKEN full-length enriched library, clone:231-Q9CR17    | Q9CR17 | 4 | 0.89  | 4 | 1.60 | 1 | 1.07  |  | 1 | 0.83 |
| Mus musculus adult male urinary bladder cDNA, RIKEN full-length enriched library, cl Q8CBV3  | Q8CBV3 |   |       |   |      |   |       |  | 2 | 1.25 |
| Mus musculus adult male urinary bladder cDNA, RIKEN full-length enriched library, cl Q8BZH0  | Q8BZH0 | 1 | 0.25  |   |      |   |       |  |   |      |
| Mus musculus adult male xiphoid cartilage cDNA, RIKEN full-length enriched library, c Q8BPP5 | Q8BPP5 | 1 | 5.44  | 1 | 3.83 |   |       |  |   |      |
| Mus musculus adult retina cDNA, RIKEN full-length enriched library, clone:A930002H Q8C8Y3    | Q8C8Y3 |   |       | 1 | 0.94 |   |       |  |   |      |
| Mus musculus adult retina cDNA, RIKEN full-length enriched library, clone:A930005E Q8C8X7    | Q8C8X7 | 3 | 2.65  | 4 | 1.72 |   |       |  | 7 | 1.68 |
| Mus musculus adult retina cDNA, RIKEN full-length enriched library, clone:A930014F Q8BLL4    | Q8BLL4 |   |       |   |      | 1 | 13.38 |  |   |      |
| Mus musculus adult retina cDNA, RIKEN full-length enriched library, clone:A930017E Q8BXQ1    | Q8BXQ1 | 1 | 1.56  |   |      |   |       |  |   |      |
| Mus musculus adult retina cDNA, RIKEN full-length enriched library, clone:A930021B Q8C8T0    | Q8C8T0 | 1 | 0.49  |   |      |   |       |  |   |      |
| Mus musculus adult retina cDNA, RIKEN full-length enriched library, clone:A930021O Q8C8S7    | Q8C8S7 | 1 | 1.83  |   |      |   |       |  | 1 | 1.09 |
| Mus musculus adult retina cDNA, RIKEN full-length enriched library, clone:A930028N Q8C8R3    | Q8C8R3 |   |       | 1 | 2.73 |   |       |  |   |      |
| Mus musculus adult retina cDNA, RIKEN full-length enriched library, clone:A930038D Q9D1Y2    | Q9D1Y2 |   |       | 1 | 0.92 |   |       |  |   |      |
| Mus musculus adult retina cDNA, RIKEN full-length enriched library, clone:A930039G Q8BI84    | Q8BI84 | 1 | 1.65  | 3 | 1.49 | 2 | 0.95  |  | 1 | 0.99 |
| Mus musculus adult retina cDNA, RIKEN full-length enriched library, clone:A930041C Q8BXL2    | Q8BXL2 | 1 | 1.46  |   |      | 1 | 1.94  |  |   |      |
| Mus musculus B6-derived CD11 +ve dendritic cells cDNA, RIKEN full-length enriched Q8BHT6     | Q8BHT6 | 1 | 1.97  | 5 | 2.08 | 1 | 2.04  |  | 5 | 1.33 |
| Mus musculus brain cDNA, clone MNCb-2440, similar to Mus musculus partial cochle Q9JJC6      | Q9JJC6 | 1 | 2.15  |   |      |   |       |  |   |      |
| Mus musculus brain cDNA, clone MNCb-2844, similar to Mus musculus mCASP (cux) Q9JJB6         | Q9JJB6 |   |       | 1 | 1.22 |   |       |  |   |      |
| Mus musculus brain CRL-1443 BC3H1 cDNA, RIKEN full-length enriched library, clon Q8BT17      | Q8BT17 |   |       |   |      |   |       |  | 1 | 2.49 |
| Mus musculus cDNA fis, clone TRACH2007688 (Wdr42a protein) Q8N7N5                            | Q8N7N5 | 2 | 0.93  | 2 | 0.59 |   |       |  |   |      |
| Mus musculus cDNA fis, clone TRACH2025057, highly similar to UDP-glucuronosyltr Q6ZQM8       | Q6ZQM8 | 7 | 1.49  | 5 | 1.12 | 3 | 4.01  |  | 5 | 0.79 |
| Mus musculus embryo RCB-0545 OHTA cDNA, RIKEN full-length enriched library, clc Q8BT18       | Q8BT18 | 2 | 1.71  |   |      |   |       |  |   |      |
| Mus musculus ES cells cDNA, RIKEN full-length enriched library, clone:2410002G23 Q9CWW8      | Q9CWW8 |   |       |   |      | 2 | 1.21  |  | 2 | 0.77 |
| Mus musculus ES cells cDNA, RIKEN full-length enriched library, clone:2410002M20 Q8BVY2      | Q8BVY2 | 6 | 0.02  | 3 | 0.01 | 3 | 0.11  |  | 1 | 0.04 |
| Mus musculus ES cells cDNA, RIKEN full-length enriched library, clone:2410007N06 Q8C6C4      | Q8C6C4 | 1 | 2.62  | 1 | 1.21 |   |       |  | 1 | 0.99 |
| Mus musculus ES cells cDNA, RIKEN full-length enriched library, clone:2410008J01 Q9CWW9      | Q9CWW9 | 2 | 1.44  | 3 | 0.89 | 1 | 1.79  |  | 3 | 1.26 |
| Mus musculus ES cells cDNA, RIKEN full-length enriched library, clone:241001323 p Q9CWP6     | Q9CWP6 | 4 | 1.50  | 2 | 1.92 | 1 | 1.07  |  |   |      |
| Mus musculus ES cells cDNA, RIKEN full-length enriched library, clone:2410015L18 Q9CWN7      | Q9CWN7 |   |       |   |      |   |       |  | 1 | 1.30 |
| Mus musculus ES cells cDNA, RIKEN full-length enriched library, clone:2410018M08 Q8CEW7      | Q8CEW7 |   |       |   |      |   |       |  | 1 | 0.17 |
| Mus musculus ES cells cDNA, RIKEN full-length enriched library, clone:2410024C15 Q9CWK5      | Q9CWK5 | 9 | 1.41  | 7 | 1.71 | 2 | 0.80  |  | 6 | 0.66 |
| Mus musculus ES cells cDNA, RIKEN full-length enriched library, clone:2410046F21 Q9CWI3      | Q9CWI3 | 1 | 2.32  |   |      |   |       |  |   |      |
| Mus musculus ES cells cDNA, RIKEN full-length enriched library, clone:2410091C18 Q9CWG8      | Q9CWG8 | 3 | 1.42  | 5 | 1.05 | 2 | 1.10  |  |   |      |
| Mus musculus ES cells cDNA, RIKEN full-length enriched library, clone:2410130M07 Q9CRB2      | Q9CRB2 | 1 | 1.53  | 2 | 1.43 | 2 | 1.01  |  |   |      |
| Mus musculus ES cells cDNA, RIKEN full-length enriched library, clone:2410166I05 p Q9CWE0    | Q9CWE0 | 2 | 1.72  | 1 | 1.86 | 2 | 2.68  |  |   |      |
| Mus musculus ES cells cDNA, RIKEN full-length enriched library, clone:C330006A15 Q8BX36      | Q8BX36 |   |       | 1 | 1.02 |   |       |  | 2 | 0.90 |
| Mus musculus ES cells cDNA, RIKEN full-length enriched library, clone:C330011N11 Q8C7V3      | Q8C7V3 |   |       | 1 | 3.19 |   |       |  |   |      |
| Mus musculus ES cells cDNA, RIKEN full-length enriched library, clone:C330016J05 Q8BX09      | Q8BX09 | 1 | 4.03  | 3 | 1.35 |   |       |  |   |      |
| Mus musculus ES cells cDNA, RIKEN full-length enriched library, clone:C330018J07 Q8BX06      | Q8BX06 | 3 | 1.72  |   |      |   |       |  |   |      |
| Mus musculus ES cells cDNA, RIKEN full-length enriched library, clone:C330020M11 Q9CQ37      | Q9CQ37 | 2 | 0.98  | 1 | 0.69 |   |       |  |   |      |
| Mus musculus ES cells cDNA, RIKEN full-length enriched library, clone:C330023I24 Q8C7S8      | Q8C7S8 | 2 | 1.01  |   |      | 2 | 2.21  |  | 2 | 3.19 |

|                                                                                         |         |    |       |    |      |   |      |    |       |        |
|-----------------------------------------------------------------------------------------|---------|----|-------|----|------|---|------|----|-------|--------|
| Mus musculus ES cells cDNA, RIKEN full-length enriched library, clone:C330023M02        | Q8BWZ3  | 3  | 2.83  | 4  | 1.70 |   |      | 3  | 0.95  |        |
| Mus musculus ES cells cDNA, RIKEN full-length enriched library, clone:C330027C09        | Q8BWWY9 |    |       |    |      |   |      | 1  | 1.67  |        |
| Myc-associated zinc finger protein (MAZI) (Purine-binding transcription factor) (Pur-1) | P56671  | 1  | 0.81  | 2  | 3.39 | 1 | 1.01 | 2  | 1.89  | 17188  |
| MYG1 protein (Gamm1 protein)                                                            | Q9JK81  | 1  | 1.85  | 2  | 0.43 |   |      | 1  | 0.57  | 60315  |
| Myocardin-related transcription factor A (MRTF-A) (Megakaryoblastic leukemia 1 prot     | Q8K4J6  |    |       |    |      |   |      | 1  | 1.21  | 223701 |
| Myosin Ic (Myosin I beta) (MMIb)                                                        | Q9WTI7  | 1  | 1.41  | 4  | 1.68 | 1 | 1.56 | 2  | 1.51  | 17913  |
| Myosin IIIA (EC 2.7.1.37)                                                               | Q8K3H5  |    |       | 1  | 0.19 |   |      |    |       | 214682 |
| Myosin IXb (Unconventional myosin-9b)                                                   | Q9QY06  | 2  | 1.62  | 3  | 1.11 |   |      | 1  | 1.11  | 17925  |
| Myosin light polypeptide 6 (Myosin light chain alkali 3) (Myosin light chain 3) (MLC-3) | Q60605  | 2  | 2.99  | 3  | 2.68 | 1 | 3.10 | 1  | 0.45  | 17904  |
| Myosin X                                                                                | Q9JJY5  | 2  | 10.29 |    |      |   |      | 1  | 7.72  |        |
| Myotrophin (V-1 protein) (Granule cell differentiation protein)                         | P62774  | 3  | 2.13  | 5  | 1.63 | 2 | 1.76 | 2  | 1.06  | 14489  |
| Myotubularin-related protein 2 (EC 3.1.3.-)                                             | Q9Z2D1  |    |       | 1  | 1.73 |   |      |    |       | 77116  |
| Myotubularin-related protein 9                                                          | Q9Z2D0  | 3  | 1.31  | 3  | 3.89 | 3 | 1.33 |    |       | 210376 |
| N(4)-(beta-N-acetylglucosaminy)-L-asparaginase precursor (EC 3.5.1.26) (Glycosylas      | Q64191  | 4  | 1.04  | 4  | 1.16 | 1 | 0.34 | 4  | 0.55  | 11593  |
| N-acetyltransferase 6 (EC 2.3.1.-) (Fus-2 protein) (Fusion 2 protein)                   | Q9R123  |    |       |    |      |   |      | 1  | 1.53  | 56441  |
| NAD-dependent deacetylase sirtuin 2 (EC 3.5.1.-) (SIR2-like protein 2) (mSIR2L2)        | Q8VDQ8  |    |       | 2  | 1.55 |   |      | 1  | 1.24  | 64383  |
| NAD-dependent deacetylase sirtuin 5 (EC 3.5.1.-) (SIR2-like protein 5)                  | Q8K2C6  | 1  | 1.55  | 1  | 2.70 | 1 | 0.80 | 2  | 1.08  | 68346  |
| NAD-dependent malic enzyme, mitochondrial precursor (EC 1.1.1.38) (NAD-ME) (Mal         | Q99KE1  | 4  | 1.78  | 4  | 1.58 | 2 | 0.74 | 3  | 1.04  | 107029 |
| NADH dehydrogenase (Ubiquinone) Fe-S protein 6                                          | Q5M9J7  | 6  | 1.58  | 8  | 1.06 | 5 | 1.24 | 4  | 1.49  |        |
| NADH-cytochrome b5 reductase (EC 1.6.2.2) (B5R) (Diaphorase 1)                          | Q9DCN2  |    |       |    |      |   |      | 3  | 28.31 |        |
| NADH-ubiquinone oxidoreductase 13 kDa-B subunit (EC 1.6.5.3) (EC 1.6.99.3) (Com         | Q9CPP6  |    |       | 1  | 1.41 |   |      |    |       | 68202  |
| NADH-ubiquinone oxidoreductase 15 kDa subunit (EC 1.6.5.3) (EC 1.6.99.3) (Comple        | Q99LY9  | 1  | 1.08  | 1  | 2.07 | 1 | 2.35 |    |       | 170658 |
| NADH-ubiquinone oxidoreductase 19 kDa subunit (EC 1.6.5.3) (EC 1.6.99.3) (Comple        | Q9DCJ5  | 2  | 1.47  | 1  | 0.95 |   |      | 1  | 1.49  | 68375  |
| NADH-ubiquinone oxidoreductase 20 kDa subunit, mitochondrial precursor (EC 1.6.5.       | Q9DC70  |    |       | 1  | 1.92 |   |      | 2  | 1.03  | 75406  |
| NADH-ubiquinone oxidoreductase 39 kDa subunit, mitochondrial precursor (EC 1.6.5.       | Q9DC69  |    |       | 1  | 0.66 |   |      |    |       | 66108  |
| NADH-ubiquinone oxidoreductase 42 kDa subunit, mitochondrial precursor (EC 1.6.5.       | Q99LC3  | 1  | 0.68  |    |      |   |      |    |       | 67273  |
| NADH-ubiquinone oxidoreductase 51 kDa subunit, mitochondrial precursor (EC 1.6.5.       | Q91Y70  | 9  | 2.06  | 5  | 1.83 | 3 | 0.85 | 8  | 1.17  | 17995  |
| NADH-ubiquinone oxidoreductase 75 kDa subunit, mitochondrial precursor (EC 1.6.5.       | Q91VD9  | 7  | 1.29  | 5  | 1.12 | 4 | 0.84 | 3  | 0.97  | 227197 |
| NADH-ubiquinone oxidoreductase B18 subunit (EC 1.6.5.3) (EC 1.6.99.3) (Complex I        | Q9CR61  | 4  | 1.02  | 4  | 1.34 | 3 | 1.72 |    |       | 66916  |
| NADH-ubiquinone oxidoreductase B22 subunit (EC 1.6.5.3) (EC 1.6.99.3) (Complex I        | Q9CQJ8  | 1  | 1.24  | 4  | 1.26 |   |      | 2  | 0.86  | 66218  |
| NADH-ubiquinone oxidoreductase B8 subunit (EC 1.6.5.3) (EC 1.6.99.3) (Complex I         | Q9CQ75  | 1  | 1.17  |    |      |   |      |    |       | 17991  |
| NADH-ubiquinone oxidoreductase PDSW subunit (EC 1.6.5.3) (EC 1.6.99.3) (Comple          | Q9DCS9  | 1  | 0.42  | 4  | 1.34 |   |      |    |       | 68342  |
| NADH-ubiquinone oxidoreductase subunit B14.5a (EC 1.6.5.3) (EC 1.6.99.3) (Comple        | Q9Z1P6  | 2  | 0.93  | 2  | 0.93 | 3 | 0.71 | 2  | 0.49  | 66416  |
| NADH-ubiquinone oxidoreductase subunit B14.7 (EC 1.6.5.3) (EC 1.6.99.3) (Comple         | Q9D8B4  | 1  | 1.24  | 2  | 1.41 | 3 | 0.85 | 4  | 1.11  | 69875  |
| NADPH:adrenodoxin oxidoreductase, mitochondrial precursor (EC 1.18.1.2) (Adrenoc        | Q61578  | 1  | 0.89  | 1  | 0.93 | 2 | 0.85 |    |       | 14149  |
| NADPH--cytochrome P450 reductase (EC 1.6.2.4) (CPR) (P450R)                             | P37040  | 8  | 1.29  | 5  | 1.19 | 2 | 1.09 | 2  | 1.01  | 18984  |
| Naglu (EC 3.2.1.50)                                                                     | O54752  |    |       | 1  | 0.96 | 1 | 1.23 |    |       |        |
| NALP-beta (Fragment)                                                                    | Q66X24  | 1  | 4.09  |    |      | 1 | 1.37 |    |       |        |
| Nardilysin precursor (EC 3.4.24.61) (N-arginine dibasic convertase) (NRD convertase     | Q8BHG1  | 2  | 1.20  | 2  | 1.16 |   |      | 3  | 1.00  | 230598 |
| NARG2 (NMDA receptor-regulated gene 2)                                                  | Q7TNL8  |    |       |    |      |   |      | 1  | 0.06  |        |
| Natural killer cell receptor (Fragment)                                                 | O88365  |    |       |    |      |   |      | 1  | 0.08  |        |
| Natural killer cell receptor-P1 (Fragment)                                              | Q61970  |    |       |    |      |   |      | 1  | 0.99  |        |
| Nedd-4-like E3 ubiquitin-protein ligase WWP2 (EC 6.3.2.-) (WW domain-containing pr      | Q9DBH0  | 2  | 0.98  | 1  | 0.92 |   |      |    |       | 66894  |
| NEDD8 ultimate buster-1 (BS4 protein)                                                   | P54729  | 2  | 1.49  | 2  | 1.63 | 1 | 3.09 | 4  | 1.99  | 53312  |
| NEDD9 interacting protein with calponin homology and LIM domains (Molecule intera       | Q8VDP3  |    |       | 3  | 1.43 |   |      | 4  | 1.17  | 171580 |
| Negative elongation factor B (NELF-B)                                                   | Q8C4Y3  | 1  | 1.16  | 2  | 0.46 |   |      |    |       | 58202  |
| Negative elongation factor D (NELF-D) (TH1-like protein)                                | Q922L6  |    |       | 2  | 1.51 |   |      | 1  | 0.32  | 57314  |
| Neighbor of COX4                                                                        | O70378  | 2  | 1.68  | 1  | 1.24 | 3 | 1.66 | 1  | 1.10  | 18117  |
| Netrin G2 precursor (Laminet-2)                                                         | Q8R4F1  |    |       |    |      |   |      | 1  | 1.52  | 171171 |
| Netrin-1 precursor                                                                      | O09118  |    |       | 1  | 4.00 |   |      |    |       | 18208  |
| Neural-restrictive silencer factor nrsf/rest                                            | Q8VIG1  |    |       | 2  | 0.45 |   |      | 2  | 6.58  |        |
| Neurobeachin protein (Lysosomal trafficking regulator 2)                                | Q9EPN1  |    |       |    |      | 1 | 2.29 |    |       | 26422  |
| Neurofibromin (Neurofibromatosis-related protein NF-1)                                  | Q04690  |    |       |    |      |   |      |    |       | 18015  |
| Neurogenic locus notch homolog protein 2 precursor (Notch 2) (Motch B)                  | O35516  | 1  | 1.53  |    |      |   |      |    |       |        |
| Neurolysin (Metallopeptidase M3 family) (Mus musculus adult male diencephalon cDN       | Q91YP2  | 4  | 1.33  | 3  | 1.69 | 4 | 2.06 | 17 | 1.29  | 18129  |
| Neuronal calcium sensor 1 (NCS-1) (Frequenin homolog)                                   | Q8BNY6  |    |       | 2  | 1.82 |   |      | 3  | 1.46  |        |
| Neuropathy target esterase homolog                                                      | Q9R114  | 1  | 1.45  | 1  | 1.00 |   |      |    |       | 14299  |
| Neurturin precursor                                                                     | Q9R114  | 1  | 0.29  |    |      |   |      |    |       |        |
| Neurturin precursor                                                                     | P97463  | 1  | 0.94  |    |      |   |      |    |       | 18188  |
| Neutral alpha-glucosidase AB precursor (EC 3.2.1.84) (Glucosidase II alpha subunit)     | Q8BHN3  | 11 | 1.28  | 12 | 1.22 | 6 | 0.94 | 6  | 0.86  | 14376  |
| NG,NG-dimethylarginine dimethylaminohydrolase 2 (EC 3.5.3.18) (Dimethylargininas        | Q99LD8  | 4  | 1.26  | 3  | 1.12 | 2 | 0.79 | 2  | 0.68  | 51793  |
| NGFI-A binding protein 2 (EGR-1 binding protein 2)                                      | Q61127  |    |       | 1  | 1.50 |   |      |    |       | 17937  |

|                                                                                                                                                                         |             |    |       |    |      |   |       |    |      |        |
|-------------------------------------------------------------------------------------------------------------------------------------------------------------------------|-------------|----|-------|----|------|---|-------|----|------|--------|
| N-glycanase 1 (Mus musculus 12 days embryo head cDNA, RIKEN full-length enriched Q8K113)                                                                                | Q8K113      |    |       | 1  | 2.26 | 1 | 1.50  | 2  | 3.87 |        |
| NHP2-like protein 1 (High mobility group-like nuclear protein 2 homolog 1) (U4/U6.U5 Q9D0T1)                                                                            | NHPX_MOUSE  | 11 | 1.17  | 13 | 1.96 | 7 | 1.25  | 3  | 0.76 | 20826  |
| Niban protein (Fragment)                                                                                                                                                | Q6PE79      | 6  | 1.70  | 8  | 1.02 | 4 | 1.37  | 2  | 0.55 |        |
| Niban-like protein                                                                                                                                                      | Q8R1F1      | 5  | 1.23  | 5  | 1.57 | 5 | 2.82  | 3  | 1.08 | 227737 |
| Nibrin                                                                                                                                                                  | O88981      | 1  | 2.32  |    |      | 1 | 1.46  | 2  | 1.54 |        |
| Nicotinamide N-methyltransferase (EC 2.1.1.1)                                                                                                                           | O55239      | 1  | 1.86  | 1  | 1.73 | 1 | 1.11  |    |      | 18113  |
| Nidogen precursor (Entactin)                                                                                                                                            | P10493      |    |       |    |      |   |       | 2  | 2.33 | 18073  |
| Nidogen-2 precursor (NID-2) (Entactin-2)                                                                                                                                | O88322      |    |       | 4  | 3.91 |   |       | 4  | 0.51 | 18074  |
| Niemann-Pick C1 protein precursor                                                                                                                                       | O35604      |    |       |    |      |   |       | 3  | 1.13 | 18145  |
| Nipped-B-like protein (Delangin homolog) (SCC2 homolog)                                                                                                                 | Q6KCD5      |    |       | 1  | 1.60 | 1 | 0.50  | 2  | 0.74 | 71175  |
| NipSnap2 protein (Glioblastoma amplified sequence)                                                                                                                      | O55126      | 1  | 1.17  | 1  | 1.12 |   |       |    |      | 14467  |
| Nit protein 2 (Nit2 protein) (Mus musculus 18-day embryo whole body cDNA, RIKEN f Q9JHW2)                                                                               | Q9JHW2      | 4  | 1.70  | 3  | 1.45 | 1 | 1.77  | 1  | 1.62 |        |
| NMDA receptor regulated protein 1 (N-terminal acetyltransferase 1) (Tubedown-1 protein)                                                                                 | Q80UM3      | 1  | 4.21  | 1  | 2.40 |   |       | 2  | 1.60 | 74838  |
| N-myc-interactor (Nmi) (N-myc and STAT interactor)                                                                                                                      | O35309      | 4  | 1.84  | 4  | 1.37 | 1 | 12.73 | 5  | 1.29 | 64685  |
| Nodal modulator 1                                                                                                                                                       | Q6GQT9      | 1  | 1.17  |    |      |   |       |    |      |        |
| Non-erythrocyte beta spectrin                                                                                                                                           | Q9QWJ7      | 2  | 1.29  |    |      |   |       |    |      |        |
| Nonmuscle heavy chain myosin II-A                                                                                                                                       | Q8VDD5      | 7  | 3.63  | 7  | 3.80 | 5 | 1.31  | 8  | 1.78 |        |
| Non-POU-domain-containing, octamer binding protein (Mus musculus 12 days embryo cDNA, RIKEN full-length enriched Q99K48)                                                | Q99K48      | 22 | 1.50  | 23 | 1.97 | 6 | 1.10  | 12 | 0.88 |        |
| Nonsyndromic hearing impairment protein 5 homolog                                                                                                                       | Q9Z2D3      |    |       |    |      | 1 | 0.60  |    |      | 54722  |
| NOP seven associated protein 1                                                                                                                                          | Q8VCG3      |    |       |    |      |   |       |    |      | 107071 |
| NOV protein homolog precursor (NovH) (Nephroblastoma overexpressed gene protein)                                                                                        | Q64299      | 3  | 1.88  | 5  | 4.09 | 1 | 0.62  | 18 | 0.36 | 18133  |
| Novel protein                                                                                                                                                           | Q5SSK3      | 1  | 0.98  | 1  | 6.72 |   |       |    |      |        |
| Novel protein                                                                                                                                                           | Q5SUR0      | 8  | 1.45  | 12 | 1.71 | 6 | 1.30  | 7  | 1.71 |        |
| Novel protein                                                                                                                                                           | Q5SWW4      |    |       |    |      |   |       | 1  | 3.19 |        |
| Novel protein                                                                                                                                                           | Q5SYH2      |    |       | 1  | 2.03 |   |       | 1  | 1.06 |        |
| Novel protein (2310079P12Rik)                                                                                                                                           | Q5SQF8      |    |       | 1  | 2.82 |   |       | 1  | 0.84 |        |
| Novel protein similar to Tensin Tns                                                                                                                                     | Q5SSZ5      | 3  | 1.44  | 3  | 0.80 | 2 | 3.46  |    |      |        |
| Novel ZZ type zinc finger domain containing protein                                                                                                                     | Q5SSH7      |    |       | 2  | 1.01 | 1 | 1.36  | 2  | 0.95 |        |
| Npep1 protein                                                                                                                                                           | Q6NSR8      | 3  | 1.30  | 3  | 1.59 |   |       |    |      |        |
| NPL4 protein                                                                                                                                                            | P60670      | 4  | 1.15  | 2  | 1.40 |   |       | 1  | 2.51 | 217365 |
| NST-1                                                                                                                                                                   | Q60637      | 2  | 2.24  | 3  | 0.95 | 2 | 1.32  | 2  | 1.39 |        |
| Nuclear cap binding protein subunit 2 (20 kDa nuclear cap binding protein) (NCBP 20)                                                                                    | Q9CQ49      | 1  | 8.12  | 1  | 4.06 | 1 | 2.99  | 2  | 1.37 | 68092  |
| Nuclear envelope pore membrane protein POM 121 (Pore membrane protein of 121 kDa)                                                                                       | Q8K3Z9      |    |       |    |      |   |       | 1  | 1.30 |        |
| Nuclear factor NF-kappa-B p100 subunit (DNA-binding factor KBF2) [Contains: Nuclear factor NF-kappa-B p105 subunit (DNA-binding factor KBF1) (EBP-1) (NF-kappa P25799)] | Q9WTK5      |    |       | 1  | 0.42 |   |       | 2  | 1.20 | 18034  |
| Nuclear factor NF-kappa-B p105 subunit (DNA-binding factor KBF1) (EBP-1) (NF-kappa P25799)                                                                              | KBF1_MOUSE  | 2  | 3.66  | 5  | 1.05 | 1 | 0.72  | 2  | 1.36 | 18033  |
| Nuclear FMRP interacting protein 1 (Nuclear fragile X mental retardation protein interactor)                                                                            | Q9QXX8      |    |       | 1  | 0.76 |   |       |    |      |        |
| Nuclear membrane binding protein NUCLING                                                                                                                                | Q8CGB3      | 2  | 1.05  | 1  | 1.42 | 1 | 0.70  |    |      |        |
| Nuclear mitotic apparatus protein 1                                                                                                                                     | Q80Y35      | 11 | 1.40  | 8  | 1.16 | 2 | 0.93  | 4  | 1.09 |        |
| Nuclear pore complex protein Nup133 (Nucleoporin Nup133) (133 kDa nucleoporin)                                                                                          | Q8R0G9      | 2  | 0.86  |    |      |   |       |    |      | 234865 |
| Nuclear pore complex protein Nup160 (Nucleoporin Nup160) (160 kDa nucleoporin) (Q9Z0W3)                                                                                 | NU160_MOUSE | 5  | 1.27  | 7  | 1.36 | 3 | 1.37  | 8  | 2.51 | 59015  |
| Nuclear pore complex protein Nup88 (Nucleoporin Nup88) (88 kDa nuclear pore complex protein)                                                                            | Q8CEC0      | 1  | 2.68  | 6  | 1.50 |   |       | 3  | 2.59 | 19069  |
| Nuclear pore complex protein Nup93 (Nucleoporin Nup93) (93 kDa nucleoporin) (CBF)                                                                                       | Q8BJ71      | 3  | 1.26  |    |      |   |       |    |      | 71805  |
| Nuclear receptor coactivator 3 (EC 2.3.1.48) (NCoA-3) (Thyroid hormone receptor activator)                                                                              | O09000      |    |       |    |      | 1 | 4.42  |    |      | 17979  |
| Nuclear receptor corepressor 2 (N-CoR2) (Silencing mediator of retinoic acid and thyroid hormone receptor corepressor)                                                  | Q9WU42      | 2  | 0.18  | 1  | 0.65 |   |       | 3  | 0.59 | 20602  |
| Nuclear receptor ROR-beta (Nuclear receptor RZR-beta)                                                                                                                   | Q8R1B8      | 1  | 2.19  |    |      |   |       |    |      | 225998 |
| Nuclear RNA export factor 1 (Tip associating protein) (Tip-associated protein) (mRNA export factor)                                                                     | Q99JX7      |    |       |    |      |   |       | 2  | 1.05 | 53319  |
| Nuclear transplantation upregulated protein 1                                                                                                                           | Q8K411      | 13 | 1.39  | 12 | 0.99 | 5 | 0.97  | 7  | 0.99 |        |
| Nuclear transport factor 2 (NTF-2)                                                                                                                                      | P61971      | 2  | 2.33  | 2  | 2.15 |   |       | 1  | 0.98 | 68051  |
| Nuclear valosin-containing protein-like (Nuclear VCP-like protein) (NVLP)                                                                                               | Q9DBY8      | 1  | 4.54  | 1  | 2.86 |   |       |    |      | 67459  |
| Nucleolar protein 1                                                                                                                                                     | Q922K7      | 2  | 1.48  | 1  | 1.41 |   |       |    |      |        |
| Nucleolar protein 3                                                                                                                                                     | Q9D1X0      | 2  | 2.19  | 2  | 0.81 | 2 | 1.84  | 3  | 1.21 | 78688  |
| Nucleolar protein family A member 1 (snRNP protein GAR1) (H/ACA ribonucleoprotein)                                                                                      | Q9CY66      |    |       |    |      |   |       | 1  | 0.83 | 68147  |
| Nucleolar protein Nop56 (Nucleolar protein 5A)                                                                                                                          | Q9D6Z1      | 2  | 1.51  | 2  | 0.81 | 1 | 0.72  |    |      | 67134  |
| Nucleoplasmin 3                                                                                                                                                         | Q9CPP0      | 2  | 1.13  | 2  | 1.16 | 2 | 1.38  | 4  | 1.13 | 18150  |
| Nucleoporin 153                                                                                                                                                         | Q80WR0      | 4  | 1.80  | 11 | 4.06 | 3 | 0.93  | 14 | 1.25 |        |
| Nucleoporin-like protein RIP (HIV-1 Rev-binding protein homolog)                                                                                                        | Q8K2K6      | 1  | 9.79  | 1  | 1.69 | 1 | 1.15  | 4  | 1.09 | 15463  |
| Nucleoside diphosphate kinase 6 (EC 2.7.4.6) (NDK 6) (NDP kinase 6) (nm23-M6)                                                                                           | O88425      |    |       |    |      |   |       | 2  | 1.45 | 54369  |
| Nucleosome assembly protein 1-like 1 (NAP-1 related protein) (Brain protein DN38)                                                                                       | P28656      | 3  | 20.44 | 1  | 7.29 | 1 | 1.69  | 2  | 1.16 | 53605  |
| Numb-like protein                                                                                                                                                       | O08919      | 1  | 1.81  |    |      |   |       |    |      | 18223  |
| Nup98 protein                                                                                                                                                           | Q6PFD9      | 1  | 1.25  | 1  | 2.75 |   |       |    |      |        |
| Olfactory receptor MOR18-1 (Olfactory receptor Olfr558) (Prostate overexpressed G-protein coupled receptor)                                                             | Q8VGZ7      |    |       | 1  | 1.64 |   |       |    |      |        |

|                                                                                       |        |             |    |       |    |       |      |      |      |       |        |
|---------------------------------------------------------------------------------------|--------|-------------|----|-------|----|-------|------|------|------|-------|--------|
| Olfactory receptor MOR210-5 (Olfactory receptor Olfr827)                              | Q8VEV5 | Q8VEV5      |    |       | 1  | 99.18 |      |      |      |       |        |
| Olfactory receptor MOR224-2 (Olfactory receptor Olfr975)                              | Q8VG91 | Q8VG91      |    |       | 1  | 1.10  |      |      |      |       |        |
| Olfactory receptor MOR261-13 (Olfactory receptor Olfr448)                             | Q8VES9 | Q8VES9      | 1  | 0.36  |    |       |      |      |      |       |        |
| Olfactory receptor MOR279-1                                                           | Q8VFA2 | Q8VFA2      |    |       |    |       |      | 1    | 0.76 |       |        |
| Olfactory receptor Olfr867                                                            | Q7TRF3 | Q7TRF3      | 2  | 1.24  |    |       |      |      |      |       |        |
| Oligophrenin 1                                                                        | Q99J31 | OPHN1_MOUSE |    |       | 1  | 1.13  |      |      |      |       | 94190  |
| Oligosaccharyl transferase STT3 subunit homolog (B5) (Integral membrane protein 1)    | P46978 | STT3_MOUSE  | 4  | 1.39  | 2  | 1.28  |      |      |      |       | 16430  |
| Oncostatin M specific receptor                                                        | O70458 | O70458      | 1  | 3.36  | 1  | 1.16  |      | 1    | 1.21 |       |        |
| Orf protein                                                                           | P70212 | P70212      | 1  | 1.05  | 1  | 2.04  |      |      |      |       |        |
| Origin recognition complex subunit 6                                                  | Q9WUJ8 | ORC6_MOUSE  |    |       | 1  | 1.28  |      |      |      |       | 56452  |
| Ornithine aminotransferase, mitochondrial precursor (EC 2.6.1.13) (Ornithine--oxo-aci | P29758 | OAT_MOUSE   | 11 | 1.15  | 9  | 1.04  | 8    | 0.90 | 10   | 0.85  | 18242  |
| Orphan nuclear receptor NR6A1 (Germ cell nuclear factor) (GCNF) (Retinoid receptor    | Q64249 | NR6A1_MOUSE |    |       | 1  | 2.45  |      |      |      |       | 14536  |
| Ortholog of human candidate tumor suppressor in ovarian cancer 2 OVCA2 (Mus mu        | Q9D7E3 | Q9D7E3      | 2  | 1.30  | 1  | 0.58  |      |      | 2    | 1.59  |        |
| Ortholog of human Ras association (RalGDS/AF-6) and pleckstrin homology domain        | Q5SR98 | Q5SR98      |    |       | 1  |       |      |      | 1    | 3.61  |        |
| Osteoclast inhibitory lectin related protein 2 (Lymphoid-derived C-type lectin-1b)    | Q8BFR3 | Q8BFR3      |    |       |    |       | 1    | 1.59 |      |       |        |
| Osteoclast stimulating factor 1 (SH3 domain protein 3)                                | Q62422 | OSTF1_MOUSE | 6  | 1.68  | 5  | 1.42  |      |      | 3    | 0.60  | 20409  |
| Otoferlin (Fer-1 like protein 2)                                                      | Q9ESF1 | OTOF_MOUSE  |    |       |    |       |      |      | 1    | 2.24  | 83762  |
| OTTMUSP00000000515                                                                    | Q5SSA0 | Q5SSA0      |    |       |    |       |      |      | 1    | 20.04 |        |
| Outer dense fiber protein                                                             | Q61999 | ODFP_MOUSE  |    |       |    |       | 1    | 0.08 |      |       | 18285  |
| Oxysterol binding protein-related protein 11 (OSBP-related protein 11) (ORP-11)       | Q8C195 | OSR11_MOUSE |    |       |    |       | 1    | 2.23 |      |       | 106326 |
| Oxysterol binding protein-related protein 2 (OSBP-related protein 2) (ORP-2)          | Q8BX94 | OSR2_MOUSE  |    |       |    |       |      |      | 1    | 0.67  | 228983 |
| Oxysterol-binding protein-like protein 1b                                             | Q673L8 | Q673L8      | 1  | 0.84  |    |       |      |      |      |       |        |
| P2X purinoceptor 7 (ATP receptor) (P2X7) (Purinergic receptor) (P2Z receptor)         | Q9Z1M0 | P2RX7_MOUSE |    |       |    | 1     | 1.51 |      |      |       | 18439  |
| Pafah1b2 protein                                                                      | Q6PKE6 | Q6PKE6      | 3  | 1.92  |    |       |      |      |      |       |        |
| Paired amphipathic helix protein Sin3a                                                | Q60520 | SIN3A_MOUSE | 4  | 1.32  | 3  | 2.06  | 1    | 9.06 | 3    | 0.78  | 20466  |
| Paladin protein                                                                       | P70261 | P70261      | 1  | 0.76  |    |       |      |      |      |       |        |
| Pancreatic alpha-amylase precursor (EC 3.2.1.1) (PA) (1,4-alpha-D-glucan glucanohy    | P00688 | AMYP_MOUSE  | 1  | 0.61  | 1  | 5.06  |      |      | 1    | 2.95  | 11723  |
| Pancreatitis-induced protein 49 (Mus musculus adult male corpora quadrigemina cDN     | Q99ML4 | Q99ML4      |    |       | 1  | 1.33  |      |      |      |       |        |
| Pantophysin (Synaptophysin-like protein)                                              | O09117 | SYPL_MOUSE  | 1  | 0.79  | 1  | 0.24  |      |      |      |       | 19027  |
| PAP associated domain containing 4                                                    | Q91Y16 | Q91Y16      | 1  | 0.42  | 1  | 0.80  |      |      | 1    | 11.98 |        |
| Papilin                                                                               | Q9EPX2 | Q9EPX2      |    |       |    |       |      |      | 2    | 4.28  |        |
| Paraspeckle protein 1 (Mus musculus 10 days embryo whole body cDNA, RIKEN full-       | Q8R326 | Q8R326      | 2  | 1.03  | 2  | 1.29  |      |      |      |       |        |
| PAS domain containing serine/threonine-protein kinase (EC 2.7.1.37) (PAS-kinase) (F   | Q8CEE6 | PASK_MOUSE  |    |       | 1  | 1.05  |      |      |      |       | 269224 |
| PDZ and LIM domain 2                                                                  | Q8R1G6 | Q8R1G6      | 2  | 14.42 | 1  | 0.59  |      |      | 3    | 2.13  |        |
| PDZ domain actin binding protein Shroom                                               | Q9QXN0 | Q9QXN0      |    |       |    |       |      |      | 1    | 0.28  |        |
| Pelota homolog                                                                        | Q80X73 | PELO_MOUSE  | 2  | 1.98  |    |       | 2    | 1.65 | 1    | 1.48  | 105083 |
| Peptidyl-prolyl cis-trans isomerase C (EC 5.2.1.8) (PPIase) (Rotamase) (Cyclophilin C | P30412 | PPIC_MOUSE  | 1  | 0.39  |    |       |      |      |      |       | 19038  |
| Peptidyl-prolyl cis-trans isomerase E (EC 5.2.1.8) (PPIase E) (Rotamase E) (Cyclophi  | Q9QZH3 | PPIE_MOUSE  |    |       | 1  | 4.86  |      |      | 2    | 1.14  | 56031  |
| Peptidyl-prolyl cis-trans isomerase like 1 (EC 5.2.1.8) (PPIase) (Rotamase)           | Q9D0W5 | PPIL1_MOUSE | 2  | 1.52  | 2  | 1.63  |      |      |      |       | 68816  |
| Peptidyl-prolyl cis-trans isomerase NIMA-interacting 1 (EC 5.2.1.8) (Rotamase Pin1) ( | Q9QUR7 | PIN1_MOUSE  | 1  | 1.07  |    |       |      |      |      |       | 23988  |
| Peptidyl-tRNA hydrolase 2, mitochondrial precursor (EC 3.1.1.29) (PTH 2)              | Q8R2Y8 | PTH2_MOUSE  | 4  | 0.85  | 3  | 1.06  |      |      | 2    | 0.75  | 217057 |
| Peri implantation stem cell 1                                                         | Q5SFM8 | Q5SFM8      | 1  | 2.25  |    |       |      |      |      |       |        |
| Pericentrin 2                                                                         | P48725 | PCNT2_MOUSE | 1  | 0.01  |    |       |      |      |      |       | 18541  |
| Periodic tryptophan protein 2 homolog                                                 | Q8BU03 | PWP2_MOUSE  |    |       |    |       | 1    | 0.01 | 1    | 0.16  | 110816 |
| Periostin precursor (PN) (Osteoblast specific factor 2) (OSF-2)                       | Q62009 | POSTN_MOUSE | 3  | 1.93  | 2  | 3.19  | 4    | 0.94 | 4    | 0.55  | 50706  |
| Peripheral plasma membrane protein CASK (EC 2.7.1.-) (Calcium/calmodulin-depend       | O70589 | CSKP_MOUSE  | 10 | 1.15  | 2  | 1.63  |      |      |      |       | 12361  |
| Peripheral-type benzodiazepine receptor-associated protein 1 (PRAX-1) (Peripheral b   | Q7TNF8 | RIMB1_MOUSE |    |       |    |       |      |      | 1    | 3.07  | 207777 |
| Peroxiredoxin 1 (EC 1.11.1.15) (Thioredoxin peroxidase 2) (Thioredoxin-dependent p    | P35700 | PRDX1_MOUSE | 9  | 2.34  | 13 | 1.83  | 13   | 2.22 | 17   | 2.01  | 18477  |
| Peroxiredoxin 2 (EC 1.11.1.15) (Thioredoxin peroxidase 1) (Thioredoxin-dependent p    | Q61171 | PRDX2_MOUSE |    |       | 5  | 4.17  | 2    | 1.19 | 3    | 0.82  | 21672  |
| Peroxiredoxin 4 (EC 1.11.1.15) (Prx-IV) (Thioredoxin peroxidase AO372) (Thioredoxi    | O08807 | PRDX4_MOUSE | 3  | 1.35  | 5  | 1.71  | 2    | 1.74 | 4    | 0.93  | 53381  |
| Peroxisomal acyl-coenzyme A thioester hydrolase 1 (EC 3.1.2.2) (Peroxisomal long-c    | P58137 | PTE1_MOUSE  | 2  | 1.51  |    |       |      |      |      |       | 170789 |
| Peroxisomal biogenesis factor 19 (Peroxin 19) (Peroxisomal farnesylated protein) (P   | Q8VCI5 | PEX19_MOUSE | 3  | 3.16  |    |       |      |      |      |       |        |
| Peroxisomal carnitine O-octanoyltransferase (EC 2.3.1.137) (COT)                      | Q9DC50 | OCTC_MOUSE  | 3  | 1.68  | 2  | 1.77  | 2    | 1.49 | 8    | 2.59  | 74114  |
| Peroxisomal D2,D4-dienoyl-CoA reductase (2-4-dienoyl-Coenzyme A reductase 2, pe       | Q9WV68 | Q9WV68      | 5  | 1.35  | 2  | 1.37  | 1    | 1.02 | 3    | 0.82  |        |
| Peroxisomal trans-2-enoyl-CoA reductase (EC 1.3.1.38)                                 | Q99MZ7 | PECR_MOUSE  | 2  | 1.24  | 2  | 1.37  | 2    | 1.17 | 1    | 1.32  |        |
| Peroxisome assembly factor-2 (PAF-2) (Peroxisomal-type ATPase 1) (Peroxin-6) (Pe      | Q99LC9 | PEX6_MOUSE  | 1  | 0.93  | 1  | 1.39  |      |      |      |       | 224824 |
| PHD finger protein 6                                                                  | Q9D4J7 | PHF6_MOUSE  | 1  | 5.27  | 2  | 1.12  |      |      | 4    | 1.71  | 70998  |
| PHD finger-like domain protein 5A (Splicing factor 3B associated 14 kDa protein) (S   | P83870 | PHF5A_MOUSE | 6  | 3.88  | 6  | 2.24  | 6    | 1.07 | 9    | 1.26  | 68479  |
| Phoducin-like protein 3 (Viral IAP-associated factor 1) (VIAF-1)                      | Q8BVF2 | PDCL3_MOUSE |    |       |    |       | 1    | 1.91 |      |       | 68833  |
| Phosphate carrier protein, mitochondrial precursor (PTP)                              | Q8VEM8 | MPCP_MOUSE  | 6  | 2.06  | 9  | 2.41  | 8    | 1.04 | 18   | 1.38  | 18674  |
| Phosphatidylinositol phosphate kinase type II gamma (Phosphatidylinositol-4-phosph    | Q91XU3 | Q91XU3      | 1  | 1.15  | 2  | 0.93  |      |      |      |       |        |

|                                                                                                 |             |    |      |  |    |      |   |      |  |  |    |      |  |  |        |
|-------------------------------------------------------------------------------------------------|-------------|----|------|--|----|------|---|------|--|--|----|------|--|--|--------|
| Phosphatidylethanolamine-binding protein (PEBP) (HCNPpp) [Contains: Hippocampa P70296           | PEBP_MOUSE  | 3  | 2.53 |  |    |      |   |      |  |  |    |      |  |  | 23980  |
| Phosphatidylinositol 4-kinase type II-like                                                      | Q8VC15      |    |      |  | 1  | 1.12 |   |      |  |  |    |      |  |  |        |
| Phosphatidylinositol 4-kinase, catalytic, alpha polypeptide                                     | Q6DIC7      | 1  | 0.60 |  |    | 0.87 | 3 | 0.71 |  |  | 4  | 1.43 |  |  |        |
| Phosphatidylinositol N-acetylglucosaminyltransferase subunit Q (EC 2.4.1.198) (Phos Q9QYT7      | PIGQ_MOUSE  |    |      |  | 1  | 1.15 |   |      |  |  |    |      |  |  | 14755  |
| Phosphatidylinositol transfer protein alpha isoform (PtdIns transfer protein alpha) (Ptd P53810 | PIPNA_MOUSE |    |      |  | 2  | 1.24 | 1 | 1.46 |  |  | 2  | 1.26 |  |  | 18738  |
| Phosphatidylinositol-3,4,5-trisphosphate 3-phosphatase PTEN (EC 3.1.3.67) (Mutatec O08586       | PTEN_MOUSE  | 2  | 1.91 |  |    |      |   |      |  |  |    |      |  |  | 19211  |
| Phosphatidylinositol-4,5-bisphosphate 3-kinase catalytic subunit, alpha isoform (EC 2. P42337   | PK3CA_MOUSE |    |      |  | 1  | 2.88 |   |      |  |  | 1  | 0.68 |  |  | 18706  |
| Phosphatidylinositol-4-phosphate 5-kinase type II alpha (EC 2.7.1.149) (PIP5KII-alpha O70172    | PI52A_MOUSE |    |      |  | 1  | 0.76 |   |      |  |  |    |      |  |  | 18718  |
| Phosphatidylinositolglycan class N                                                              | Q9R1S3      |    |      |  | 1  | 0.52 |   |      |  |  |    |      |  |  |        |
| Phosphatidylserine decarboxylase proenzyme (EC 4.1.1.65) [Contains: Phosphatidyls Q8BSF4        | PISD_MOUSE  | 1  | 2.54 |  |    | 0.95 |   |      |  |  | 2  | 0.46 |  |  | 320951 |
| Phosphoenolpyruvate carboxykinase, mitochondrial precursor [GTP] (EC 4.1.1.32) (P Q8BH04        | PPCKM_MOUSE | 1  | 1.37 |  |    |      |   |      |  |  | 3  | 1.54 |  |  | 74551  |
| Phosphoglycerate mutase 1 (EC 5.4.2.1) (EC 5.4.2.4) (EC 3.1.3.13) (Phosphoglycera Q9DBJ1        | PGAM1_MOUSE | 6  | 1.39 |  | 5  | 1.22 | 3 | 2.03 |  |  | 3  | 0.77 |  |  | 18648  |
| Phosphoinositide 3-kinase                                                                       | Q61182      |    |      |  |    |      |   |      |  |  | 1  | 0.94 |  |  |        |
| Phospholipase A2 receptor precursor                                                             | Q62028      | 1  | 0.30 |  | 6  | 0.89 | 3 | 0.62 |  |  | 4  | 1.38 |  |  |        |
| Phospholipase C beta 4                                                                          | Q91UZ1      | 1  | 1.34 |  |    |      |   |      |  |  | 1  | 0.68 |  |  |        |
| Phospholipid scramblase 3 (PL scramblase 3) (Ca(2+)-dependent phospholipid scarr Q9JIZ9         | PLS3_MOUSE  | 1  | 4.07 |  | 3  | 5.52 | 1 | 0.58 |  |  | 6  | 0.75 |  |  | 70310  |
| Phosphomevalonate kinase (EC 2.7.4.2) (PMKase)                                                  | Q9D1G2      | 1  | 1.88 |  | 3  | 1.35 |   |      |  |  |    |      |  |  | 68603  |
| Phosphoserine aminotransferase (EC 2.6.1.52) (PSAT) (Endometrial progesterone-ini Q99K85        | SERC_MOUSE  | 11 | 1.64 |  | 2  | 2.41 | 1 | 1.81 |  |  |    |      |  |  | 107272 |
| Phosphotriesterase related protein (Parathion hydrolase-related protein)                        | Q60866      | 2  | 1.04 |  |    |      | 1 | 1.54 |  |  | 3  | 2.95 |  |  | 19212  |
| Pianissimo                                                                                      | Q6QI06      | 1  | 0.38 |  |    |      |   |      |  |  |    |      |  |  |        |
| Pigx protein (Mus musculus adult male small intestine cDNA, RIKEN full-length enrich Q99LV7     | Q99LV7      |    |      |  | 1  | 0.33 |   |      |  |  |    |      |  |  |        |
| Pik3r4 protein                                                                                  | Q8VD65      |    |      |  |    |      | 1 | 1.06 |  |  |    |      |  |  |        |
| Pilin-like transcription factor                                                                 | Q78J03      | 2  | 1.34 |  | 2  | 1.59 |   |      |  |  |    |      |  |  |        |
| Placental thrombin inhibitor (Protease inhibitor 6) (PI-6) (Serpine B6)                         | Q60854      | 3  | 1.31 |  | 4  | 1.40 | 7 | 1.92 |  |  | 18 | 1.47 |  |  | 20719  |
| Plakophilin 3                                                                                   | Q9QY23      |    |      |  | 1  | 0.43 |   |      |  |  |    |      |  |  | 56460  |
| Plasma membrane Ca++ transporting ATPase 4 splice variant b                                     | Q6Q477      | 1  | 2.10 |  |    |      |   |      |  |  |    |      |  |  |        |
| Plasminogen precursor (EC 3.4.21.7) [Contains: Angiostatin]                                     | P20918      |    |      |  | 2  | 0.21 |   |      |  |  | 1  | 6.18 |  |  | 18815  |
| Plastin 3, (T-plastin)                                                                          | Q99K51      | 2  | 1.78 |  | 1  | 1.14 |   |      |  |  |    |      |  |  |        |
| Platelet-activating factor acetylhydrolase IB alpha subunit (PAF acetylhydrolase 45 kC P63005   | LIS1_MOUSE  | 3  | 1.03 |  | 3  | 1.20 | 2 | 1.36 |  |  | 2  | 1.03 |  |  | 18472  |
| Platelet-activating factor acetylhydrolase IB gamma subunit (EC 3.1.1.47) (PAF acetyl Q61205    | PA1B3_MOUSE | 1  | 2.14 |  |    |      |   |      |  |  |    |      |  |  | 18476  |
| Platelet-endothelial tetraspan antigen 3 (PETA-3) (GP27) (Membrane glycoprotein SF O35566       | CD151_MOUSE |    |      |  |    |      |   |      |  |  | 1  | 0.39 |  |  | 12476  |
| Pleckstrin homology domain containing family C member 1                                         | Q8CIB5      | 2  | 1.51 |  | 3  | 0.81 | 1 | 1.63 |  |  | 3  | 1.19 |  |  | 218952 |
| Pleckstrin homology domain-containing protein family A member 2 (Tandem PH dom Q9ERS5           | PLEA2_MOUSE | 2  | 0.75 |  |    |      |   |      |  |  |    |      |  |  | 83436  |
| Plectin 10                                                                                      | Q6S385      |    |      |  | 1  | 3.94 |   |      |  |  |    |      |  |  |        |
| Pleiotrophin precursor (PTN) (Heparin-binding growth-associated molecule) (HB-GAM P63089        | PTN_MOUSE   | 3  | 1.17 |  | 2  | 1.81 |   |      |  |  | 2  | 1.13 |  |  | 19242  |
| Pleiotropic regulator 1                                                                         | Q922V4      | 1  | 1.48 |  | 1  | 6.72 |   |      |  |  |    |      |  |  | 53317  |
| Plekhf1 protein                                                                                 | Q99M16      | 1  | 0.52 |  |    |      |   |      |  |  |    |      |  |  |        |
| Plexin 1                                                                                        | P70206      | 1  | 2.24 |  | 2  | 2.36 |   |      |  |  | 5  | 1.08 |  |  |        |
| Plexin 2                                                                                        | P70207      | 1  | 0.71 |  | 3  | 1.12 |   |      |  |  | 4  | 0.22 |  |  |        |
| Plexin 3                                                                                        | P70208      |    |      |  | 1  | 4.10 |   |      |  |  | 2  | 2.63 |  |  |        |
| Plexin D1                                                                                       | Q68HV1      | 1  | 6.94 |  | 2  | 1.04 |   |      |  |  |    |      |  |  |        |
| Pixnb2 protein                                                                                  | Q8K2J5      | 2  | 1.36 |  | 2  | 1.41 | 1 | 1.22 |  |  | 2  | 0.95 |  |  |        |
| Pogo transposable element with ZNF domain                                                       | Q8BZH4      |    |      |  |    |      |   |      |  |  | 1  | 0.68 |  |  | 229584 |
| Poly (ADP-ribose) polymerase family, member 8                                                   | Q8VCB5      | 1  | 1.21 |  |    |      |   |      |  |  |    |      |  |  |        |
| Poly(A)-specific ribonuclease PARN (EC 3.1.13.4) (Polyadenylate-specific ribonuclea Q8VDG3      | PARN_MOUSE  |    |      |  |    |      |   |      |  |  | 1  | 0.64 |  |  |        |
| Poly(ADP-ribose) glycohydrolase (EC 3.2.1.143)                                                  | Q88622      | 1  | 0.76 |  |    |      |   |      |  |  | 1  | 1.68 |  |  | 26430  |
| Poly(rC)-binding protein 1 (Alpha-CP1) (hnRNP-E1)                                               | P60335      | 4  | 1.36 |  | 11 | 1.19 | 1 | 1.64 |  |  | 4  | 1.62 |  |  | 23983  |
| Poly(rC)-binding protein 2 (Alpha-CP2) (Putative heterogeneous nuclear ribonucleopr Q61990      | PCBP2_MOUSE | 7  | 1.91 |  | 4  | 1.38 |   |      |  |  | 2  | 1.17 |  |  | 18521  |
| Polyadenylate-binding protein-interacting protein 1 (Poly(A) binding protein-interactin Q8VE62  | PAIP1_MOUSE | 1  | 1.46 |  | 3  | 1.06 | 1 | 1.47 |  |  | 2  | 1.27 |  |  | 218693 |
| Polycomb complex protein BMI-1                                                                  | P25916      | 2  | 1.18 |  | 2  | 1.29 |   |      |  |  | 2  | 0.88 |  |  | 12151  |
| Polycystic kidney disease 1 protein                                                             | O08852      |    |      |  | 1  | 0.13 |   |      |  |  |    |      |  |  |        |
| Polycystin 2                                                                                    | O35245      | 1  | 1.69 |  | 1  | 2.01 |   |      |  |  |    |      |  |  | 18764  |
| Polymerase delta interacting protein 2                                                          | Q91VA6      | 2  | 0.76 |  |    |      |   |      |  |  |    |      |  |  | 67811  |
| Polypeptide N-acetylgalactosaminyltransferase 10 (EC 2.4.1.41) (Protein-UDP acetyl Q6P9S7       | GLT10_MOUSE |    |      |  |    |      |   |      |  |  | 1  | 0.27 |  |  | 171212 |
| Polypeptide N-acetylgalactosaminyltransferase 11 (EC 2.4.1.41) (Protein-UDP acetyl Q921L8       | GLT11_MOUSE |    |      |  | 1  | 1.33 |   |      |  |  |    |      |  |  | 231050 |
| Polypeptide N-acetylgalactosaminyltransferase 13 (EC 2.4.1.41) (Protein-UDP acetyl Q8CF93       | GLT13_MOUSE |    |      |  |    |      | 1 | 0.77 |  |  |    |      |  |  | 271786 |
| Polypeptide N-acetylgalactosaminyltransferase 2 (EC 2.4.1.41) (Protein-UDP acetyl Q6PB93        | GALT2_MOUSE | 5  | 0.96 |  | 6  | 0.76 | 5 | 0.88 |  |  | 7  | 1.06 |  |  | 108148 |
| Postmeiotic segregation increased 1                                                             | Q8K119      |    |      |  |    |      |   |      |  |  | 1  | 2.49 |  |  |        |
| Potassium channel mKv3.2 (Fragment)                                                             | P70311      |    |      |  |    |      |   |      |  |  | 1  | 1.23 |  |  |        |
| Potential phospholipid-transporting ATPase IB (EC 3.6.3.1) (ATPase class I type 8A n P98200     | AT8A2_MOUSE | 1  | 1.29 |  |    |      |   |      |  |  |    |      |  |  | 50769  |
| Potential phospholipid-transporting ATPase VD (EC 3.6.3.1) (ATPVD)                              | AT10D_MOUSE |    |      |  |    |      |   |      |  |  | 1  | 0.33 |  |  | 231287 |



|                                                                                          |        |             |    |       |    |       |    |      |        |
|------------------------------------------------------------------------------------------|--------|-------------|----|-------|----|-------|----|------|--------|
| Ppat protein                                                                             | Q8CIH9 | Q8CIH9      | 2  | 10.00 | 1  | 14.98 | 3  | 3.42 |        |
| Ppig protein (Fragment)                                                                  | Q80VC1 | Q80VC1      | 1  | 0.56  |    |       |    |      |        |
| PR-domain zinc finger protein 1 (Beta-interferon gene positive-regulatory domain I bin   | Q60636 | PRDM1_MOUSE |    |       |    |       | 1  | 6.46 | 12142  |
| Pre-B-cell leukemia transcription factor interacting protein 1 (Pbxip1 protein) (Mus mu  | Q8R319 | Q8R319      | 2  | 1.90  | 3  | 1.52  | 2  | 1.00 | 0.78   |
| Preferentially expressed antigen in melanoma-like protein                                | Q99MW3 | Q99MW3      |    |       | 1  | 4.92  |    |      |        |
| Pre-mRNA branch site protein p14 (SF3B 14 kDa subunit)                                   | P59708 | PM14_MOUSE  | 3  | 1.48  | 3  | 1.77  | 3  | 1.19 | 6      |
| Pre-mRNA cleavage complex II protein Clp1                                                | Q99LI9 | CFP1_MOUSE  |    |       | 1  | 56.62 |    |      | 66055  |
| Pre-mRNA processing 8 protein                                                            | Q99PV0 | Q99PV0      | 9  | 1.69  | 5  | 2.24  | 4  | 2.19 | 8      |
| Pre-mRNA splicing factor PRP17 (Cell division cycle 40 homolog)                          | Q9DC48 | PRP17_MOUSE |    |       | 1  | 3.42  |    |      | 71713  |
| Prenylcysteine oxidase precursor (EC 1.8.3.5)                                            | Q9CQF9 | PCYOX_MOUSE | 2  | 1.32  | 2  | 0.91  |    |      |        |
| Probable ATP-dependent 61 kDa nucleolar RNA helicase (EC 3.6.1.-) (DEAD-box pro          | Q9D0R4 | DDX56_MOUSE | 1  | 1.77  | 1  | 1.05  |    |      | 52513  |
| Probable ATP-dependent helicase DDX48 (DEAD-box protein 48)                              | Q91VC3 | DDX48_MOUSE | 1  | 1.54  |    |       |    |      | 192170 |
| Probable ATP-dependent RNA helicase DDX27 (DEAD-box protein 27)                          | Q921N6 | DDX27_MOUSE |    |       |    |       | 2  | 1.14 | 228889 |
| Probable cation-transporting ATPase 13A1 (EC 3.6.3.-) (CATP)                             | Q9EPE9 | AT131_MOUSE |    |       | 1  | 1.22  |    |      | 170759 |
| Probable dimethyladenosine transferase (EC 2.1.1.-) (S-adenosylmethionine-6-N',N'-z      | Q9D0D4 | DIMH_MOUSE  |    |       | 1  | 3.19  |    |      | 66254  |
| Probable ergosterol biosynthetic protein 28                                              | Q9ERY9 | ERG28_MOUSE |    |       | 2  | 1.82  |    | 2    | 0.75   |
| Probable leucyl-tRNA synthetase, mitochondrial precursor (EC 6.1.1.4) (Leucine--trN      | Q8VDC0 | SYLM_MOUSE  | 3  | 0.76  | 2  | 0.88  |    |      | 102436 |
| Probable ribosome biogenesis protein NEP1 (C2f protein)                                  | Q35130 | NEP1_MOUSE  | 1  | 1.19  | 1  | 1.04  |    |      | 14791  |
| Probable ubiquitin carboxyl-terminal hydrolase CYLD (EC 3.1.2.15) (Ubiquitin thiolestr   | Q80TQ2 | CYLD_MOUSE  |    |       |    |       |    | 1    | 2.24   |
| Probable ubiquitin carboxyl-terminal hydrolase FAF-X (EC 3.1.2.15) (Ubiquitin thiolest   | P70398 | USP9X_MOUSE | 1  | 2.47  | 4  | 3.28  | 4  | 2.98 | 4      |
| Procollagen C-proteinase enhancer protein precursor (PCPE) (Type I procollagen CO        | Q61398 | PCOLC_MOUSE | 12 | 1.31  | 7  | 1.63  | 2  | 1.12 | 18542  |
| Procollagen type V alpha 2                                                               | Q61431 | Q61431      |    |       | 1  | 2.79  |    | 1    | 1.32   |
| Procollagen-lysine,2-oxoglutarate 5-dioxygenase 1 precursor (EC 1.14.11.4) (Lysyl hy     | Q9R0E2 | PLOD1_MOUSE | 1  | 2.32  | 2  | 1.68  | 1  | 1.55 | 4      |
| Procollagen-lysine,2-oxoglutarate 5-dioxygenase 2 precursor (EC 1.14.11.4) (Lysyl hy     | Q9R0B9 | PLOD2_MOUSE | 1  | 1.32  | 1  | 1.34  |    |      | 26432  |
| Procollagen-lysine,2-oxoglutarate 5-dioxygenase 3 precursor (EC 1.14.11.4) (Lysyl hy     | Q9R0E1 | PLOD3_MOUSE | 6  | 1.08  | 3  | 1.63  |    | 1    | 7.57   |
| Profilin-1 (Profilin I)                                                                  | P62962 | PROF1_MOUSE | 9  | 1.79  | 13 | 1.35  | 4  | 1.49 | 5      |
| Programmed cell death protein 8, mitochondrial precursor (EC 1.-.-.-) (Apoptosis-indu    | Q9Z0X1 | PDCD8_MOUSE | 8  | 0.86  | 11 | 0.88  | 1  | 0.81 | 5      |
| Prohibitin (B-cell receptor associated protein 32) (BAP 32)                              | P67778 | PHB_MOUSE   | 8  | 1.57  | 3  | 1.08  |    | 5    | 1.08   |
| Prolactin regulatory element-binding protein (Mammalian guanine nucleotide exchang       | Q9WUQ2 | PREB_MOUSE  |    |       | 1  | 2.95  |    | 1    | 0.59   |
| Proliferating cell nuclear antigen (PCNA) (Cyclin)                                       | P17918 | PCNA_MOUSE  | 7  | 1.37  | 5  | 1.36  | 6  | 1.23 | 5      |
| Proliferation related acidic leucine rich protein PAL31 (Acidic nuclear phosphoprotein   | Q9EST5 | Q9EST5      | 9  | 0.77  | 8  | 0.77  |    | 2    | 0.58   |
| Proliferation-associated protein 2G4 (Proliferation-associated protein 1) (Protein p38-; | P50580 | PA2G4_MOUSE | 5  | 1.27  | 8  | 1.64  | 6  | 1.47 | 4      |
| Proline synthetase co-transcribed bacterial homolog protein                              | Q9Z2Y8 | PROSC_MOUSE |    |       |    |       |    | 1    | 4.51   |
| Prolyl 4-hydroxylase alpha-1 subunit precursor (EC 1.14.11.2) (4-PH alpha-1) (Procoll    | Q60715 | P4HA1_MOUSE | 6  | 1.19  | 6  | 1.18  | 4  | 2.96 | 3      |
| Prolyl 4-hydroxylase alpha-2 subunit precursor (EC 1.14.11.2) (4-PH alpha-2) (Procoll    | Q60716 | P4HA2_MOUSE | 8  | 1.57  | 9  | 1.77  | 6  | 0.94 | 6      |
| Proteasome (Prosome, macropain) activator subunit 4                                      | Q5SSW2 | Q5SSW2      | 2  | 0.43  |    |       |    |      |        |
| Proteasome activator complex subunit 1 (Proteasome activator 28-alpha subunit) (PA       | P97371 | PSME1_MOUSE | 2  | 2.44  | 4  | 1.74  | 1  | 2.18 | 5      |
| Proteasome activator complex subunit 2 (Proteasome activator 28-beta subunit) (PA2       | P97372 | PSME2_MOUSE | 2  | 1.21  | 3  | 0.93  | 2  | 0.91 | 3      |
| Proteasome activator complex subunit 3 (Proteasome activator 28-gamma subunit) (F        | P61290 | PSME3_MOUSE | 1  | 2.40  | 1  | 0.81  |    |      | 19192  |
| Proteasome subunit alpha type 1 (EC 3.4.25.1) (Proteasome component C2) (Macrop          | Q9R1P4 | PSA1_MOUSE  | 2  | 0.88  | 1  | 0.88  |    |      | 26440  |
| Proteasome subunit alpha type 4 (EC 3.4.25.1) (Proteasome component C9) (Macrop          | Q9R1P0 | PSA4_MOUSE  | 6  | 1.55  | 3  | 1.03  | 1  | 1.28 | 6      |
| Proteasome subunit alpha type 5 (EC 3.4.25.1) (Proteasome zeta chain) (Macropain ;       | Q9Z2U1 | PSA5_MOUSE  | 2  | 1.56  | 1  | 1.26  |    |      | 26442  |
| Proteasome subunit alpha type 6 (EC 3.4.25.1) (Proteasome iota chain) (Macropain ic      | Q9QUM9 | PSA6_MOUSE  | 12 | 1.40  | 17 | 1.30  | 10 | 1.31 | 12     |
| Proteasome subunit alpha type 7 (EC 3.4.25.1) (Proteasome subunit RC6-1)                 | Q9Z2U0 | PSA7_MOUSE  | 4  | 2.00  | 6  | 1.39  | 5  | 1.48 | 4      |
| Proteasome subunit beta type 1 (EC 3.4.25.1) (Proteasome component C5) (Macrop           | O09061 | PSB1_MOUSE  | 4  | 2.00  | 4  | 1.44  | 4  | 1.52 | 2      |
| Proteasome subunit beta type 2 (EC 3.4.25.1) (Proteasome component C7-I) (Macrop         | Q9R1P3 | PSB2_MOUSE  | 6  | 1.27  | 5  | 0.79  | 1  | 0.93 | 26445  |
| Proteasome subunit beta type 3 (EC 3.4.25.1) (Proteasome theta chain) (Proteasome        | Q9R1P1 | PSB3_MOUSE  | 5  | 1.37  | 5  | 1.00  |    | 1    | 0.61   |
| Proteasome subunit beta type 7 precursor (EC 3.4.25.1) (Proteasome subunit Z) (Mar       | P70195 | PSB7_MOUSE  | 1  | 1.00  |    |       |    | 1    | 50.41  |
| Proteasome-associated protein ECM29 homolog (Ecm29)                                      | Q6PDI5 | ECM29_MOUSE | 9  | 1.79  | 6  | 1.77  | 6  | 1.79 | 1      |
| Protein arginine N-methyltransferase 1 (EC 2.1.1.-)                                      | Q9JIF0 | ANM1_MOUSE  | 2  | 1.24  | 2  | 0.99  |    |      | 15469  |
| Protein arginine N-methyltransferase 5 (EC 2.1.1.-) (Shk1 kinase-binding protein 1 ho    | Q8CIG8 | SKB1_MOUSE  |    |       | 3  | 0.49  |    | 2    | 0.59   |
| Protein BAT5 (HLA-B-associated transcript 5) (NG26 protein)                              | Q9Z1Q2 | BAT5_MOUSE  | 5  | 1.52  | 4  | 1.76  |    |      | 193742 |
| Protein C11orf15 homolog                                                                 | Q9JJR8 | CK015_MOUSE |    |       | 2  | 1.88  |    |      | 56786  |
| Protein C14orf103 homolog                                                                | Q80XK6 | CN103_MOUSE |    |       |    |       |    | 1    | 1.83   |
| Protein C14orf130 homolog                                                                | Q8BU04 | CN130_MOUSE |    |       | 1  | 3.48  |    |      | 66622  |
| Protein C14orf133 homolog                                                                | Q8BGQ1 | CN133_MOUSE |    |       |    |       |    | 1    | 0.51   |
| Protein C14orf159 homolog, mitochondrial precursor                                       | Q8BH86 | CN159_MOUSE | 5  | 0.66  | 1  | 1.02  | 1  | 1.28 | 217830 |
| Protein C14orf166 homolog                                                                | Q9CQE8 | CN166_MOUSE | 4  | 1.08  | 1  | 0.83  |    |      | 68045  |
| Protein C14orf21 homolog                                                                 | Q8BMC4 | CN021_MOUSE |    |       | 2  | 2.06  |    | 1    | 0.80   |
| Protein C14orf24 homolog                                                                 | Q8BR63 | CN024_MOUSE | 1  | 0.18  |    |       |    |      | 73385  |
| Protein C14orf31 homolog                                                                 | Q8C0V9 | CN031_MOUSE |    |       |    |       |    | 1    | 1.44   |

|                                                                                           |         |             |    |       |    |       |   |      |    |       |        |
|-------------------------------------------------------------------------------------------|---------|-------------|----|-------|----|-------|---|------|----|-------|--------|
| Protein C14orf94 homolog                                                                  | Q8BFT2  | CN094_MOUSE |    |       |    |       |   |      | 1  | 2.77  | 219072 |
| Protein C1orf8 homolog precursor (Thymic dendritic cell-derived factor 1)                 | Q9QY73  | CA008_MOUSE |    |       | 2  | 1.55  |   |      |    |       | 56374  |
| Protein C20orf22 homolog                                                                  | Q99LR1  | CT022_MOUSE | 8  | 1.20  | 4  | 1.38  | 4 | 1.00 | 4  | 0.75  | 76192  |
| Protein C20orf43 homolog                                                                  | Q99K95  | CT043_MOUSE | 2  | 2.75  | 1  | 1.55  |   |      |    |       | 66404  |
| Protein C6orf130 homolog                                                                  | Q8R5F3  | CF130_MOUSE | 1  | 1.79  | 1  | 2.19  |   |      | 2  | 1.51  | 106821 |
| Protein C6orf55 homolog                                                                   | Q9CR26  | CF055_MOUSE | 1  | 1.17  | 3  | 0.81  |   |      |    |       | 66201  |
| Protein disulfide-isomerase A5 precursor (EC 5.3.4.1) (Protein disulfide isomerase-rel    | Q921X9  | PDIA5_MOUSE | 8  | 2.00  | 5  | 1.59  | 5 | 1.24 | 10 | 0.92  |        |
| Protein FAM20B precursor                                                                  | Q8VCS3  | FM20B_MOUSE | 2  | 2.85  | 4  | 1.67  |   |      | 1  | 1.01  | 215015 |
| Protein FAM3A precursor                                                                   | Q9D8T0  | FAM3A_MOUSE | 1  | 0.28  |    |       |   |      | 2  | 1.21  | 66294  |
| Protein FAM45                                                                             | Q9D8N2  | FAM45_MOUSE |    |       |    |       |   |      | 5  | 1.42  | 67894  |
| Protein FAM49B                                                                            | Q921M7  | FA49B_MOUSE |    |       |    |       |   |      | 2  | 2.07  | 223601 |
| Protein inhibitor of activated STAT protein 1 (DEAD/H box binding protein 1)              | Q88907  | PIAS1_MOUSE |    |       |    |       |   |      | 1  | 1.57  | 56469  |
| Protein inhibitor of activated STAT protein 4 (Protein inhibitor of activated STAT protei | Q9JM05  | PIAS4_MOUSE | 1  | 1.43  |    |       |   |      |    |       | 59004  |
| Protein KIAA0196                                                                          | Q8C2E7  | K0196_MOUSE |    |       | 1  | 3.51  |   |      |    |       | 223593 |
| Protein KIAA0317                                                                          | Q8CHG5  | K0317_MOUSE |    |       |    |       |   |      | 1  | 0.11  |        |
| Protein KIAA1219 homolog                                                                  | Q8BQZ4  | K1219_MOUSE | 1  | 1.15  |    |       |   |      |    |       | 228850 |
| Protein KIAA1404 (Fragment)                                                               | Q8R151  | K1404_MOUSE |    |       | 1  | 10.48 |   |      | 2  | 6.14  | 98999  |
| Protein kinase C and casein kinase II substrate protein 3                                 | Q99JB8  | PACN3_MOUSE | 1  | 1.55  | 3  | 1.29  | 3 | 0.67 | 3  | 0.95  | 80708  |
| Protein kinase C and casein kinase substrate in neurons protein 2                         | Q9WVE8  | PACN2_MOUSE |    |       | 1  | 0.85  |   |      | 3  | 2.25  | 23970  |
| Protein kinase C, alpha type (EC 2.7.1.37) (PKC-alpha) (PKC-A)                            | P20444  | KPCA_MOUSE  | 4  | 2.38  | 8  | 2.61  | 3 | 1.19 | 9  | 1.32  | 18750  |
| Protein kinase C, beta type (EC 2.7.1.37) (PKC-beta) (PKC-B)                              | P68404  | KPCB_MOUSE  |    |       | 1  | 3.47  |   |      | 2  | 1.65  | 18751  |
| Protein kinase C, delta type (EC 2.7.1.-) (nPKC-delta)                                    | P28867  | KPCD_MOUSE  |    |       | 1  | 6.95  |   |      | 2  | 1.47  | 18753  |
| Protein kinase C, epsilon type (EC 2.7.1.-) (nPKC-epsilon)                                | P16054  | KPCE_MOUSE  |    |       | 1  | 2.56  |   |      |    |       | 18754  |
| Protein kinase C, iota type (EC 2.7.1.37) (nPKC-iota) (Atypical protein kinase C-lambd    | Q62074  | KPCI_MOUSE  |    |       | 3  | 1.02  | 4 | 2.02 | 4  | 1.41  | 18759  |
| Protein kinase N2 (EC 2.7.1.37) (Protein kinase C-like 2) (Protein-kinase C-related kir   | Q8BWW9  | PKL2_MOUSE  | 1  | 3.62  |    |       |   |      |    |       | 109333 |
| Protein LRP16                                                                             | Q922B1  | LRP16_MOUSE | 5  | 0.98  |    |       |   |      |    |       | 107227 |
| Protein MICAL-2                                                                           | Q8BML1  | MICA2_MOUSE | 1  | 37.17 | 1  | 2.79  | 2 | 0.60 | 6  | 1.25  | 320878 |
| Protein O-mannosyl-transferase 2 (EC 2.4.1.109) (Dolichyl-phosphate-mannose--prot         | Q8BGQ4  | POMT2_MOUSE | 1  | 1.53  | 2  | 2.59  |   |      |    |       | 217734 |
| Protein phosphatase 1, regulatory (Inhibitor) subunit 8                                   | Q8R3G1  | Q8R3G1      | 1  | 1.08  | 1  | 1.95  |   |      |    |       |        |
| Protein phosphatase 2, regulatory subunit B (B56), alpha isoform (Protein phosphatase     | Q6PD03  | Q6PD03      |    |       |    |       |   |      | 3  | 0.96  |        |
| Protein phosphatase 2A, regulatory subunit B' (PP2A, subunit B', PR53 isoform) (Pho       | P58389  | PTPA_MOUSE  |    |       |    |       |   |      | 2  | 2.70  | 110854 |
| Protein phosphatase 2C alpha isoform (EC 3.1.3.16) (PP2C-alpha) (IA) (Protein phosph      | P49443  | PP2CA_MOUSE | 4  | 2.30  | 2  | 2.19  | 6 | 1.64 | 8  | 1.51  | 19042  |
| Protein phosphatase 2C gamma isoform (EC 3.1.3.16) (PP2C-gamma) (Protein phosph           | Q61074  | PP2CG_MOUSE | 2  | 0.54  | 1  | 1.41  |   |      |    |       | 14208  |
| Protein phosphatase methylesterase 1 (EC 3.1.1.-) (PME-1)                                 | Q8BVQ5  | PME1_MOUSE  | 12 | 1.84  | 17 | 1.17  | 4 | 1.61 | 2  | 1.19  | 72590  |
| Protein transport protein Sec23A (SEC23-related protein A)                                | Q01405  | SC23A_MOUSE | 3  | 1.96  | 2  | 1.02  | 2 | 1.50 | 9  | 1.26  | 20334  |
| Protein transport protein Sec23B (SEC23-related protein B)                                | Q9D662  | SC23B_MOUSE | 10 | 1.40  | 9  | 1.17  |   |      | 6  | 1.21  | 27054  |
| Protein transport protein Sec61 alpha subunit isoform 1 (Sec61 alpha-1)                   | P61620  | S61A1_MOUSE | 10 | 1.56  | 5  | 1.35  |   |      | 7  | 0.93  | 53421  |
| Protein tyrosine phosphatase (EC 3.1.3.48) (Ptpn11 protein)                               | Q64509  | Q64509      | 1  | 3.63  |    |       |   |      |    |       |        |
| Protein UNQ9166/PRO28631 homolog precursor                                                | Q8QZV2  | U9166_MOUSE |    |       | 1  | 1.52  |   |      |    |       | 219134 |
| Proteinase activated receptor 1 precursor (PAR-1) (Thrombin receptor)                     | P30558  | PAR1_MOUSE  |    |       |    |       |   |      | 1  | 0.56  | 14062  |
| Protein-associating with the carboxyl-terminal domain of ezrin (Ezrin-binding protein     | FQ9DBQ7 | PACE1_MOUSE |    |       | 1  | 0.49  |   |      |    |       |        |
| Protein-lysine 6-oxidase precursor (EC 1.4.3.13) (Lysyl oxidase) (RAS excision protei     | P28301  | LYOX_MOUSE  | 1  | 1.33  | 3  | 2.70  | 2 | 3.06 | 3  | 1.33  | 16948  |
| Protein-tyrosine phosphatase                                                              | O35239  | O35239      | 2  | 1.26  | 1  | 1.73  |   |      |    |       |        |
| Protein-tyrosine phosphatase, receptor-type, S precursor (EC 3.1.3.48) (Protein-tyrosi    | Q64699  | Q64699      | 2  | 1.63  | 1  | 1.59  |   |      |    |       |        |
| Protein-tyrosine sulfotransferase 1 (EC 2.8.2.20) (Tyrosylprotein sulfotransferase-1) (   | O70281  | TPS1_MOUSE  | 2  | 0.83  |    |       |   |      |    |       | 22021  |
| Protein-tyrosine sulfotransferase 2 (EC 2.8.2.20) (Tyrosylprotein sulfotransferase-2) (   | O88856  | TPS2_MOUSE  |    |       |    |       |   |      | 1  | 0.94  | 22022  |
| Proteolipid protein 2                                                                     | Q9R1Q7  | PLP2_MOUSE  | 2  | 2.16  | 3  | 1.46  | 4 | 0.98 | 3  | 1.22  |        |
| Proto-oncogene tyrosine-protein kinase ABL1 (EC 2.7.1.112) (p150) (c-ABL)                 | P00520  | ABL1_MOUSE  |    |       | 1  | 0.02  |   |      |    |       | 11350  |
| Proto-oncogene tyrosine-protein kinase YES (EC 2.7.1.112) (P61-YES) (C-YES)               | Q04736  | YES_MOUSE   | 1  | 1.59  | 2  | 1.34  |   |      |    |       | 22612  |
| Protoporphyrinogen oxidase (EC 1.3.3.4) (PPO)                                             | P51175  | PPOX_MOUSE  | 1  | 2.49  |    |       |   |      |    |       | 19044  |
| PRP19/PSO4 homolog (Nuclear matrix protein 200) (Nuclear matrix protein SNEV)             | Q99KP6  | PRP19_MOUSE | 8  | 1.56  | 11 | 2.13  | 2 | 1.08 | 5  | 1.38  | 28000  |
| Psmd1 protein (Fragment)                                                                  | Q8CGG2  | Q8CGG2      | 8  | 1.76  | 3  | 0.89  | 2 | 0.38 | 2  | 2.54  |        |
| PTB-associated splicing factor (Splicing factor proline/glutamine rich) (Polypyrimidine   | Q8VIJ6  | Q8VIJ6      | 5  | 1.32  | 7  | 1.87  | 2 | 1.20 | 1  | 2.02  |        |
| Ptpn23 protein (Fragment)                                                                 | Q6PB44  | Q6PB44      | 1  | 2.26  | 1  | 0.69  |   |      |    |       |        |
| Pumilio homolog 1                                                                         | Q80U78  | PUM1_MOUSE  |    |       | 2  | 1.47  |   |      |    |       | 80912  |
| Pumilio homolog 2                                                                         | Q80U58  | PUM2_MOUSE  | 2  | 1.47  | 3  | 1.27  |   |      | 1  | 12.82 | 80913  |
| Purine nucleoside phosphorylase (EC 2.4.2.1) (Inosine phosphorylase) (PNP)                | P23492  | PNPH_MOUSE  |    |       |    |       |   |      | 1  | 1.24  | 18950  |
| Puromycin-sensitive aminopeptidase (EC 3.4.11.-) (PSA)                                    | Q11011  | PSA_MOUSE   | 2  | 3.20  | 5  | 1.40  |   |      | 7  | 1.67  | 19155  |
| Putative deoxyribose-phosphate aldolase (EC 4.1.2.4) (Phosphodeoxyriboaldolase) (I        | Q91YP3  | DEOC_MOUSE  | 1  | 1.20  | 1  | 1.54  |   |      |    |       | 232449 |
| Putative GTP-binding protein PTD004 homolog                                               | Q9CZ30  | PTD4_MOUSE  | 7  | 1.39  | 6  | 1.58  | 1 | 2.06 | 4  | 1.35  | 67059  |
| Putative lipid kinase (Multi-substrate lipid kinase) (Mus musculus 15 days embryo hea     | Q9ESW4  | Q9ESW4      | 2  | 0.62  | 2  | 0.74  |   |      |    |       |        |

|                                                                                        |        |             |    |       |    |      |    |      |  |    |       |        |
|----------------------------------------------------------------------------------------|--------|-------------|----|-------|----|------|----|------|--|----|-------|--------|
| Putative olfactory receptor 204-5                                                      | Q8VG43 | OR20_MOUSE  |    |       |    |      |    |      |  | 1  | 0.23  | 258770 |
| Putative pre-mRNA splicing factor RNA helicase (DEAH box protein 15)                   | O35286 | DHX15_MOUSE | 4  | 1.07  | 4  | 1.41 | 3  | 1.60 |  | 4  | 1.12  | 13204  |
| Putative RNA-binding protein Luc7-like 1                                               | Q9CY14 | LUC7L_MOUSE | 1  | 1.79  | 1  | 5.30 | 1  | 2.66 |  | 6  | 1.65  | 66978  |
| Putative RNA-binding protein Luc7-like 2 (CGI-74 homolog)                              | Q7TNC4 | LC7L2_MOUSE | 1  | 10.16 |    |      |    |      |  | 7  | 1.47  | 192196 |
| Putative Sp100-related protein                                                         | Q99388 | S100R_MOUSE |    |       |    |      |    |      |  | 1  | 14.30 | 114564 |
| Putative steroid dehydrogenase KIK-I (EC 1.1.1.-)                                      | O70503 | DHBK_MOUSE  | 16 | 1.29  | 25 | 1.18 | 3  | 1.62 |  | 7  | 1.07  | 56348  |
| Putative T1/ST2 receptor binding protein precursor (Fragment)                          | Q61073 | Q61073      | 2  | 8.97  |    |      |    |      |  |    |       |        |
| Pyrc1 protein                                                                          | Q8R0P9 | Q8R0P9      |    |       |    |      |    |      |  | 1  | 1.16  |        |
| Pygo2 protein (Pygopus 2)                                                              | Q80V76 | Q80V76      | 1  | 2.80  | 3  | 2.43 | 4  | 2.03 |  | 2  | 2.34  |        |
| Pyroglutamyl-peptidase 1 (EC 3.4.19.3) (Pyrrolidone-carboxylate peptidase) (5-oxopro   | Q9ESW8 | PGPI_MOUSE  | 1  | 2.21  |    |      |    |      |  |    |       | 66522  |
| Pyroline-5-carboxylate reductase 1 (EC 1.5.1.2) (P5CR 1) (P5C reductase 1)             | Q922W5 | P5CR1_MOUSE | 2  | 1.15  | 2  | 1.00 |    |      |  |    |       |        |
| Pyroline-5-carboxylate reductase 2 (EC 1.5.1.2) (P5CR 2) (P5C reductase 2)             | Q922Q4 | P5CR2_MOUSE | 7  | 1.37  | 2  | 1.09 |    |      |  | 2  | 2.67  |        |
| Pyruvate carboxylase, mitochondrial precursor (EC 6.4.1.1) (Pyruvic carboxylase) (PC   | Q05920 | PYC_MOUSE   | 7  | 1.16  | 8  | 1.30 | 1  | 0.82 |  | 2  | 0.85  | 18563  |
| Pyruvate dehydrogenase E1 component alpha subunit, somatic form, mitochondrial pr      | P35486 | ODPA_MOUSE  | 4  | 1.75  | 7  | 1.41 | 3  | 1.60 |  | 5  | 1.40  | 18597  |
| Pyruvate dehydrogenase E1 component alpha subunit, testis-specific form, mitochon      | P35487 | ODPAT_MOUSE |    |       |    |      |    |      |  | 2  | 0.95  | 18598  |
| Pyruvate dehydrogenase E1 component beta subunit, mitochondrial precursor (EC 1.       | Q9D051 | ODPB_MOUSE  | 4  | 1.06  | 4  | 1.55 | 1  | 1.70 |  | 3  | 2.37  | 68263  |
| Pyruvate kinase, isozyme M2 (EC 2.7.1.40)                                              | P52480 | KPYM_MOUSE  | 34 | 2.03  | 54 | 2.06 | 13 | 2.64 |  | 22 | 1.47  | 18746  |
| Queuine tRNA-ribosyltransferase domain containing 1                                    | Q5XK35 | Q5XK35      | 1  | 2.07  |    |      |    |      |  | 1  | 0.62  |        |
| Quiescin Q6-like 1                                                                     | Q8K0M2 | Q8K0M2      |    |       | 2  | 0.65 | 2  | 0.82 |  |    |       |        |
| Quinone oxidoreductase (EC 1.6.5.5) (NADPH:quinone reductase) (Zeta-crystallin)        | P47199 | QOR_MOUSE   | 4  | 1.96  | 3  | 1.15 | 2  | 3.03 |  | 1  | 3.80  | 12972  |
| Quinone oxidoreductase-like 1 (EC 1.-.-) (QOH-1) (Zeta-crystallin homolog)             | Q921W4 | QORL_MOUSE  | 1  | 1.37  | 2  | 1.52 | 5  | 1.31 |  | 2  | 1.13  | 66609  |
| Rab GDP dissociation inhibitor alpha (Rab GDI alpha) (GDI-1)                           | P50396 | GDI_MOUSE   | 12 | 1.68  | 18 | 1.13 | 7  | 1.62 |  | 7  | 1.03  | 14567  |
| Rab GDP dissociation inhibitor beta-2 (Rab GDI beta-2) (GDI-3)                         | Q61598 | GDIC_MOUSE  | 9  | 2.18  | 3  | 1.06 | 4  | 1.58 |  | 5  | 1.25  | 14569  |
| Rab proteins geranylgeranyltransferase component A 2 (Rab escort protein 2) (REP-2     | Q9QZD5 | RAE2_MOUSE  |    |       |    |      |    |      |  | 1  | 0.29  | 12663  |
| RAB30, member RAS oncogene family                                                      | Q923S9 | Q923S9      | 3  | 1.23  | 1  | 1.63 | 1  | 1.08 |  |    |       |        |
| RAB35, member RAS oncogene family                                                      | Q6PHN9 | Q6PHN9      |    |       | 2  | 1.69 | 1  | 0.41 |  | 1  | 0.79  |        |
| Rab3il1 protein                                                                        | Q8VDV3 | Q8VDV3      | 1  | 2.02  | 1  | 1.00 |    |      |  |    |       |        |
| Rab3ip protein                                                                         | Q68EF0 | Q68EF0      |    |       | 1  | 1.06 |    |      |  |    | 0.64  |        |
| Rab6 interacting protein 2 (ERC protein 1) (ERC1) (CAZ-associated structural protein   | Q99M11 | RB6I2_MOUSE | 2  | 0.88  | 2  | 1.01 |    |      |  |    |       | 111173 |
| Rab-related GTP-binding protein (RBJ protein)                                          | Q923I0 | Q923I0      |    |       |    |      |    |      |  | 1  | 1.12  |        |
| Rac GTPase-activating protein (MgcRacGAP variant alpha) (MgcRacGAP variant bet         | Q9WVM1 | Q9WVM1      |    |       |    |      |    |      |  | 1  | 1.16  |        |
| Rac/Cdc42 guanine nucleotide exchange factor 6                                         | Q8K4I3 | Q8K4I3      | 3  | 1.04  |    |      | 1  | 1.55 |  |    |       |        |
| RAD50-interacting protein 1 (Protein RINT-1)                                           | Q8BZ36 | RINT1_MOUSE | 2  | 0.49  | 3  | 1.02 |    |      |  | 1  | 2.55  |        |
| RAF proto-oncogene serine/threonine-protein kinase (EC 2.7.1.37) (Raf-1) (C-RAF) (c    | Q99N57 | RAF1_MOUSE  | 1  | 1.49  | 1  | 0.44 |    |      |  | 1  | 2.00  | 110157 |
| Ral guanine nucleotide dissociation stimulator-like 2 (RalGDS-like factor)             | Q61193 | RGL2_MOUSE  |    |       | 1  | 1.52 |    |      |  |    |       | 19732  |
| Ran-binding protein 2                                                                  | Q9ERU9 | Q9ERU9      | 18 | 2.03  | 22 | 2.15 | 9  | 1.09 |  | 33 | 1.24  |        |
| RanBp21                                                                                | Q924C1 | Q924C1      | 7  | 1.24  | 15 | 1.29 | 5  | 1.37 |  | 8  | 1.78  |        |
| Ran-specific GTPase-activating protein (Ran binding protein 1) (RANBP1) (Hpal1 tiny    | P34022 | RANG_MOUSE  | 5  | 1.37  |    |      | 1  | 2.45 |  | 2  | 1.38  | 19385  |
| Ras and Rab interactor 3 (Ras interaction/interference protein 3)                      | P59729 | RIN3_MOUSE  |    |       | 1  | 1.98 |    |      |  |    |       | 217835 |
| Ras GTPase-activating protein 2 (GAP1m)                                                | P58069 | RASA2_MOUSE |    |       | 1  | 0.38 |    |      |  | 1  | 1.28  | 114713 |
| Ras homolog gene family, member T2 (MIRO2)                                             | Q8JZN7 | Q8JZN7      | 2  | 0.73  | 2  | 0.36 | 2  | 0.84 |  | 3  | 0.43  |        |
| Rasa3 protein (Fragment)                                                               | Q6PG24 | Q6PG24      | 1  | 2.98  | 1  | 1.83 |    |      |  |    |       |        |
| Rasa4 protein (Ca2+ promoted Ras inactivator)                                          | Q6PFQ7 | Q6PFQ7      | 2  | 1.55  | 2  | 1.38 |    |      |  | 3  | 0.80  |        |
| Ras-GTPase-activating protein binding protein 1 (GAP SH3-domain binding protein 1)     | P97855 | G3BP_MOUSE  | 3  | 1.15  | 4  | 0.79 |    |      |  |    |       | 27041  |
| Ras-related C3 botulinum toxin substrate 1 (p21-Rac1)                                  | P63001 | RAC1_MOUSE  | 10 | 1.44  | 11 | 1.25 | 8  | 1.99 |  | 9  | 1.29  | 19353  |
| Ras-related protein Rab-12 (Rab-13) (Fragment)                                         | P35283 | RAB12_MOUSE | 3  | 2.18  | 3  | 1.32 | 2  | 1.46 |  | 2  | 1.35  | 19328  |
| Ras-related protein Rab-14                                                             | Q91V41 | RAB14_MOUSE | 3  | 1.03  | 4  | 0.80 |    |      |  | 1  | 0.15  | 68365  |
| Ras-related protein Rab-18                                                             | P35293 | RAB18_MOUSE | 9  | 1.50  | 6  | 1.62 | 2  | 1.53 |  | 7  | 1.36  | 19330  |
| Ras-related protein Rab-19                                                             | P35294 | RAB19_MOUSE |    |       |    |      |    |      |  | 1  | 0.74  | 19331  |
| Ras-related protein Rab-23 (Rab-15)                                                    | P35288 | RAB23_MOUSE |    |       | 1  | 1.00 | 1  | 1.23 |  |    |       | 19335  |
| Ras-related protein Rab-24 (Rab-16)                                                    | P35290 | RAB24_MOUSE |    |       | 1  | 2.59 |    |      |  |    |       | 19336  |
| Ras-related protein Rab-4A                                                             | P56371 | RAB4A_MOUSE | 1  | 1.18  |    |      |    |      |  |    |       | 19341  |
| Ras-related protein Rab-4B                                                             | Q91ZR1 | RB4B_MOUSE  | 4  | 1.81  | 3  | 1.18 | 1  | 0.10 |  |    |       | 19342  |
| Ras-related protein Rab-7                                                              | P51150 | RAB7_MOUSE  | 10 | 1.71  | 11 | 1.39 | 10 | 1.23 |  | 11 | 1.05  | 19349  |
| Ras-related protein Rap-1A (Ras-related protein Krev-1)                                | P62835 | RAP1A_MOUSE | 1  | 4.03  | 2  | 1.67 | 1  | 1.05 |  | 2  | 0.94  | 109905 |
| Ras-related protein Rap-1b (GTP-binding protein smg p21B)                              | Q99JI6 | RAP1B_MOUSE | 1  | 1.22  | 3  | 1.04 | 1  | 0.75 |  |    |       | 215449 |
| Receptor-interacting serine/threonine-protein kinase 2 (EC 2.7.1.37)                   | P58801 | RIPK2_MOUSE | 1  | 2.53  |    |      |    |      |  |    |       | 192656 |
| Receptor-interacting serine/threonine-protein kinase 2 (EC 2.7.1.37) (Serine/threonine | Q60855 | RIPK1_MOUSE | 3  | 1.30  | 1  | 1.38 | 1  | 1.96 |  | 2  | 1.26  | 19766  |
| Receptor-type tyrosine-protein phosphatase gamma precursor (EC 3.1.3.48) (Protein-     | Q05909 | PTPRG_MOUSE |    |       |    | 2.04 | 2  | 0.59 |  | 2  | 0.61  | 19270  |
| Receptor-type tyrosine-protein phosphatase kappa precursor (EC 3.1.3.48) (Protein-t    | P35822 | PTPRK_MOUSE |    |       |    | 1.52 |    |      |  |    |       | 19272  |
| Regulator of differentiation 1 (Rod1)                                                  | Q8BHD7 | ROD1_MOUSE  | 4  | 1.70  | 2  | 1.63 |    |      |  | 1  | 0.45  | 230257 |

|                                                                                                             |             |             |    |      |    |      |    |      |    |        |        |
|-------------------------------------------------------------------------------------------------------------|-------------|-------------|----|------|----|------|----|------|----|--------|--------|
| Replication factor C (Activator 1) 4                                                                        | Q99J62      | Q99J62      |    |      | 2  | 1.24 |    |      | 2  | 1.36   |        |
| Replication protein A 14 kDa subunit (RP-A) (RF-A) (Replication factor-A protein 3)                         | Q9CQ71      | RFA3_MOUSE  | 2  | 1.00 | 3  | 1.51 | 3  | 2.56 | 1  | 0.46   | 68240  |
| Replication protein A1                                                                                      | Q8VEE4      | Q8VEE4      | 3  | 1.65 | 1  | 0.74 | 1  | 1.13 | 2  | 0.89   |        |
| Reticulon 4 interacting protein 1 (Mus musculus adult male liver tumor cDNA, RIKEN cDNA)                    | Q8R1T0      | Q8R1T0      |    |      | 1  | 0.25 |    |      |    |        |        |
| Reticulon protein 3                                                                                         | Q9ES97      | RTN3_MOUSE  | 1  | 0.42 | 1  | 2.13 |    |      | 1  | 0.95   | 20168  |
| Retinal-specific ATP-binding cassette transporter (ATP-binding cassette, sub-family A O35600)               | ABCA4_MOUSE | ABCA4_MOUSE |    |      |    |      |    |      | 1  | 100.64 |        |
| Retinoblastoma-binding protein 9 (RBBP-9) (B5T overexpressed gene protein) (Bog protein)                    | O88851      | RBBP9_MOUSE | 1  | 0.79 | 1  | 0.64 |    |      |    |        | 26450  |
| Retinoic acid early inducible protein 1 delta precursor (RAE-1delta)                                        | Q9JI58      | RAE1D_MOUSE | 1  | 1.08 |    |      |    |      | 1  | 0.71   | 56554  |
| Retinoic acid early inducible protein 1 epsilon precursor (RAE-1epsilon)                                    | Q9CZQ6      | RAE1E_MOUSE | 2  | 1.47 | 3  | 2.03 | 1  | 2.23 | 7  | 0.98   | 19370  |
| Retinoic acid receptor beta (RAR-beta)                                                                      | P22605      | RRB_MOUSE   | 1  | 2.88 |    |      |    |      |    |        | 218772 |
| Retinoic acid-binding protein II, cellular (CRABP-II)                                                       | P22935      | RABP2_MOUSE | 3  | 2.99 |    |      | 1  | 1.00 |    |        | 12904  |
| Retinol dehydrogenase 11 (EC 1.1.1.-) (Retinal reductase 1) (RalR1) (Prostate short-chain dehydrogenase 11) | Q9QYF1      | RDH11_MOUSE | 3  | 3.46 | 4  | 1.23 | 1  | 1.18 | 4  | 0.82   | 17252  |
| Retinol dehydrogenase 13 (EC 1.1.1.-)                                                                       | Q8CEE7      | RDH13_MOUSE | 1  | 1.94 |    |      |    |      |    |        | 108841 |
| Retinol dehydrogenase 14 (EC 1.1.1.-) (Alcohol dehydrogenase PAN2)                                          | Q9ER16      | RDH14_MOUSE | 1  | 1.39 | 2  | 1.81 |    |      |    |        | 105014 |
| Retrovirus-related Pol polyprotein LINE-1 (Long interspersed element-1) (L1) [Contains 11369 bp]            | P11369      | POL2_MOUSE  |    |      | 1  | 0.13 |    |      |    |        |        |
| Reversion-inducing cysteine-rich protein with Kazal motifs precursor (mRECK)                                | Q9Z0J1      | RECK_MOUSE  |    |      | 2  | 3.41 |    |      | 8  | 0.77   | 53614  |
| Rho GDP-dissociation inhibitor 1 (Rho GDI 1) (Rho-GDI alpha) (GDI-1)                                        | Q99PT1      | GDIR_MOUSE  | 2  | 2.49 |    |      |    |      |    |        | 192662 |
| Rho guanine nucleotide exchange factor 10                                                                   | Q8C033      | ARHGA_MOUSE | 1  | 0.52 |    |      |    |      |    |        |        |
| Rho guanine nucleotide exchange factor 12 (Leukemia-associated RhoGEF)                                      | Q8R4H2      | ARHGC_MOUSE | 1  | 1.30 |    |      |    |      |    |        | 69632  |
| Rho-associated protein kinase 1 (EC 2.7.1.37) (Rho-associated, coiled-coil containing protein kinase 1)     | P70335      | ROCK1_MOUSE |    |      |    |      |    |      | 2  | 1.35   | 19877  |
| Rho-associated protein kinase 2 (EC 2.7.1.37) (Rho-associated, coiled-coil containing protein kinase 2)     | P70336      | ROCK2_MOUSE | 2  | 2.57 | 2  | 1.35 | 5  | 2.01 | 4  | 1.49   | 19878  |
| Rho-GTPase-activating protein 5 (p190-B)                                                                    | P97393      | RHG05_MOUSE |    |      | 2  | 1.63 |    |      | 3  | 1.30   | 11855  |
| Rho-guanine nucleotide exchange factor (Rho-interacting protein 2) (RhoGEF) (RIP2)                          | P97433      | RGNEF_MOUSE |    |      | 1  | 0.18 |    |      |    |        | 110596 |
| Rho-related GTP-binding protein RhoB                                                                        | P62746      | RHOB_MOUSE  | 4  | 1.38 | 4  | 1.28 | 4  | 1.05 | 4  | 0.75   | 11852  |
| Rho-related GTP-binding protein RhoC (Silica-induced gene 61 protein) (SIG-61)                              | Q62159      | RHOC_MOUSE  | 4  | 1.23 | 9  | 1.37 | 2  | 2.19 | 2  | 0.77   | 11853  |
| Rho-related GTP-binding protein RhoD                                                                        | P97348      | RHOD_MOUSE  | 2  | 1.97 |    |      |    |      |    |        | 11854  |
| Rho-related GTP-binding protein RhoE (Rho family GTPase 3) (Rnd3)                                           | P61588      | RND3_MOUSE  | 7  | 1.16 | 8  | 1.20 | 1  | 1.43 |    |        | 74194  |
| Rho-related GTP-binding protein RhoG (Sid 10750)                                                            | P84096      | RHOG_MOUSE  | 2  | 1.37 | 5  | 2.34 | 5  | 1.60 | 3  | 1.75   | 56212  |
| Ribonuclease 4 precursor (EC 3.1.27.-) (RNase 4)                                                            | Q9JUH1      | RNAS4_MOUSE |    |      |    |      |    |      | 1  | 0.09   | 58809  |
| Ribonuclease P protein subunit p21 (EC 3.1.26.5) (RNaseP protein p21) (Ribonuclease P subunit p21)          | Q8R040      | RP21_MOUSE  | 1  | 3.38 |    |      |    |      | 1  | 5.09   | 67676  |
| Ribonuclease P protein subunit p30 (EC 3.1.26.5) (RNaseP protein p30) (RNase P subunit p30)                 | O88796      | RP30_MOUSE  | 2  | 1.35 | 4  | 1.11 |    |      |    |        | 54364  |
| Ribonuclease T2 precursor (EC 3.1.27.-) (Ribonuclease 6)                                                    | Q9CQ01      | RNT2_MOUSE  |    |      | 1  | 1.07 |    |      |    |        | 68195  |
| Ribonuclease/angiogenesis inhibitor 1                                                                       | Q91V17      | Q91V17      | 1  | 1.81 | 3  | 1.19 |    |      | 2  | 1.77   |        |
| Ribonucleoside-diphosphate reductase M2 chain (EC 1.17.4.1) (Ribonucleotide reductase M2 chain)             | P11157      | RIR2_MOUSE  |    |      | 1  | 3.33 |    |      | 1  | 0.82   | 20135  |
| Ribose-phosphate pyrophosphokinase II (EC 2.7.6.1) (Phosphoribosyl pyrophosphate synthetase II)             | Q9CS42      | PRPS2_MOUSE | 2  | 1.29 | 1  | 1.21 |    |      |    |        | 110639 |
| Ribosomal protein L10A                                                                                      | Q5XJF6      | Q5XJF6      | 14 | 1.73 | 16 | 1.56 | 15 | 1.45 | 15 | 1.37   |        |
| Ribosome biogenesis protein Nop10 (Nucleolar protein family A member 3)                                     | Q9CQS2      | NOP10_MOUSE | 1  | 0.46 | 1  | 1.19 |    |      |    |        | 66181  |
| Ribosome-binding protein 1 (Ribosome receptor protein) (mRRp)                                               | Q99PL5      | RRBP1_MOUSE | 3  | 0.97 | 3  | 1.12 | 1  | 1.15 | 2  | 1.51   | 81910  |
| RIKEN cDNA 1110003E01 (Mus musculus 18-day embryo whole body cDNA, RIKEN cDNA)                              | Q91VT8      | Q91VT8      |    |      | 1  | 2.68 |    |      |    |        |        |
| RIKEN cDNA 1110012J17                                                                                       | Q6PAM2      | Q6PAM2      |    |      |    |      |    |      | 1  | 23.58  |        |
| RIKEN cDNA 1110015K06                                                                                       | Q6P4S8      | Q6P4S8      |    |      | 2  | 1.88 |    |      | 1  | 0.53   |        |
| RIKEN cDNA 1110028E10 (Mus musculus 16 days embryo head cDNA, RIKEN full-length cDNA)                       | Q8K2F1      | Q8K2F1      | 9  | 1.56 | 10 | 1.90 | 4  | 0.46 | 5  | 0.81   |        |
| RIKEN cDNA 1110032A13                                                                                       | Q6P3B9      | Q6P3B9      | 1  | 0.66 | 1  | 0.58 |    |      |    |        |        |
| RIKEN cDNA 1190002C06                                                                                       | Q91YT1      | Q91YT1      |    |      | 1  | 1.08 |    |      | 2  | 1.49   |        |
| RIKEN cDNA 1700012G19                                                                                       | Q8CHP8      | Q8CHP8      | 3  | 1.80 | 3  | 1.17 | 2  | 1.48 | 4  | 0.97   |        |
| RIKEN cDNA 1810047C23 (Mus musculus 10 day old male pancreas cDNA, RIKEN full-length cDNA)                  | Q99K23      | Q99K23      | 3  | 2.54 | 1  | 2.37 | 1  | 2.56 | 2  | 1.21   |        |
| RIKEN cDNA 2010305A19 (Mus musculus 9.5 days embryo parthenogenote cDNA, FQ921H9)                           | Q921H9      | Q921H9      |    |      | 1  | 1.03 |    |      |    |        |        |
| RIKEN cDNA 2210404D11                                                                                       | Q80W42      | Q80W42      |    |      | 2  | 8.24 | 1  | 1.61 | 3  | 0.72   |        |
| RIKEN cDNA 2210415M20                                                                                       | Q91XD6      | Q91XD6      | 1  | 1.94 | 1  | 1.05 |    |      |    |        |        |
| RIKEN cDNA 2410003C20 (Mus musculus adult male liver tumor cDNA, RIKEN full-length cDNA)                    | Q8R1N0      | Q8R1N0      | 1  | 3.22 |    |      | 2  | 1.49 |    |        |        |
| RIKEN cDNA 2410104I19                                                                                       | Q91VR6      | Q91VR6      | 1  | 2.70 | 2  | 1.28 |    |      |    |        |        |
| RIKEN cDNA 2510001I10                                                                                       | Q80W47      | Q80W47      | 1  | 0.74 |    |      |    |      |    |        |        |
| RIKEN cDNA 2610034N24                                                                                       | Q8CIM8      | Q8CIM8      | 3  | 1.46 | 2  | 1.45 |    |      | 1  | 1.07   |        |
| RIKEN cDNA 2610101N10                                                                                       | Q6NV83      | Q6NV83      | 1  | 0.59 | 1  | 0.75 | 2  | 0.71 |    |        |        |
| RIKEN cDNA 2610204M08                                                                                       | Q6P9T3      | Q6P9T3      | 13 | 2.61 | 10 | 1.39 | 5  | 1.36 | 6  | 1.11   |        |
| RIKEN cDNA 2610206B13                                                                                       | Q8K2Y0      | Q8K2Y0      |    |      | 1  | 1.72 |    |      |    |        |        |
| RIKEN cDNA 2610301B20                                                                                       | Q6PDD5      | Q6PDD5      |    |      |    |      |    |      | 1  | 2.63   |        |
| RIKEN cDNA 2810428C21                                                                                       | Q8R3P8      | Q8R3P8      |    |      |    |      |    |      | 2  | 1.50   |        |
| RIKEN cDNA 2810484M10 (Mus musculus 12 days embryo spinal ganglion cDNA, RIKEN cDNA)                        | Q922Q1      | Q922Q1      | 5  | 1.69 | 4  | 1.46 | 1  | 1.17 | 1  | 1.53   |        |
| RIKEN cDNA 2810485I05                                                                                       | Q80XP8      | Q80XP8      |    |      |    |      |    |      | 2  | 1.42   |        |
| RIKEN cDNA 4432404J10                                                                                       | Q6PAR5      | Q6PAR5      | 2  | 1.54 | 1  | 0.60 | 1  | 1.39 |    |        |        |

|                                                                                               |         |             |    |      |    |      |   |       |    |      |        |
|-----------------------------------------------------------------------------------------------|---------|-------------|----|------|----|------|---|-------|----|------|--------|
| RIKEN cDNA 4931406C07 (4931406C07Rik protein) (Mus musculus 2 days neonate                    | Q91V76  | Q91V76      | 5  | 2.34 | 4  | 1.49 | 2 | 1.89  | 3  | 1.98 |        |
| RIKEN cDNA 5430437P03                                                                         | Q99JU2  | Q99JU2      | 1  | 1.44 |    |      |   |       |    |      |        |
| RIKEN cDNA 5830404H04                                                                         | Q80XM8  | Q80XM8      |    |      |    |      | 1 | 0.99  | 1  | 0.25 |        |
| RIKEN cDNA 6330409N04 (Mus musculus adult male medulla oblongata cDNA, RIKE                   | Q8K1Y1  | Q8K1Y1      |    |      | 4  | 4.14 | 1 | 2.63  | 4  | 1.03 |        |
| RIKEN cDNA 6720456B07 (Mus musculus 12 days embryo male wolffian duct includ                  | Q91VR8  | Q91VR8      | 2  | 2.37 |    |      |   |       |    |      |        |
| RIKEN cDNA 6720458F09 gene                                                                    | Q80XC2  | Q80XC2      |    |      | 1  | 0.30 |   |       | 1  | 1.57 |        |
| RIKEN cDNA 9530014D17 gene                                                                    | Q6NVF0  | Q6NVF0      |    |      | 1  | 0.92 |   |       |    |      |        |
| RIKEN cDNA C330023F11 (Mus musculus 7 days neonate cerebellum cDNA, RIKEN                     | Q8R127  | Q8R127      | 6  | 1.14 | 4  | 1.06 | 2 | 1.06  |    |      |        |
| RIKEN cDNA D130038B21 (Mus musculus 12 days embryo spinal ganglion cDNA, RI                   | Q8QZR4  | Q8QZR4      | 1  | 1.54 |    |      |   |       |    |      |        |
| RIKEN cDNA F830014G06 gene                                                                    | Q5U4D9  | Q5U4D9      | 2  | 1.40 | 2  | 1.89 |   |       | 2  | 1.18 |        |
| RING finger and CHY zinc finger domain containing protein 1 (Zinc finger protein              | Q9CR50  | ZN363_MOUSE | 3  | 0.75 | 3  | 1.55 |   |       |    |      | 68098  |
| Ring finger protein 126                                                                       | Q91YL2  | Q91YL2      |    |      | 1  | 1.64 |   |       | 1  | 1.66 |        |
| RING finger protein 14 (Androgen receptor-associated protein 54) (Triad2 protein)             | Q9JI90  | RNF14_MOUSE |    |      | 1  | 7.77 |   |       | 1  | 0.10 | 56736  |
| RING finger protein 19 (XY body protein) (XYbp) (Gametogenesis expressed protei               | P50636  | RNF19_MOUSE |    |      |    |      |   |       | 1  | 0.32 | 30945  |
| Ring finger protein 20                                                                        | Q7TT11  | Q7TT11      |    |      |    |      |   |       | 1  | 1.90 |        |
| Ring finger protein 168                                                                       | Q80XJ2  | Q80XJ2      |    |      |    |      | 1 | 0.57  |    |      |        |
| RING-box protein 2 (Rbx2) (RING finger protein 7) (Sensitive to apoptosis gene protei         | Q9WZT1  | RBX2_MOUSE  |    |      | 1  | 2.02 |   |       | 3  | 1.14 | 19823  |
| RNA 3'-terminal phosphate cyclase (EC 6.5.1.4) (RNA-3'-phosphate cyclase) (RNA c <sub>3</sub> | Q9D7H3  | RTC1_MOUSE  | 2  | 1.24 | 5  | 1.32 | 2 | 1.05  | 2  | 1.91 | 66368  |
| RNA binding motif protein 19                                                                  | Q8R3C6  | Q8R3C6      |    |      | 1  | 1.15 |   |       | 1  | 1.30 |        |
| RNA-binding region containing protein 2 (Coactivator of activating protein-1 and estro        | Q8VH51  | RNPC2_MOUSE | 6  | 1.20 | 12 | 1.52 | 5 | 1.16  | 7  | 1.10 | 170791 |
| Rootletin                                                                                     | Q8CJ40  | Q8CJ40      |    |      | 1  | 1.86 |   |       |    |      |        |
| Rotatin (Fragment)                                                                            | Q8R4Y8  | Q8R4Y8      |    |      | 1  | 0.10 |   |       |    |      |        |
| Rpsud1 protein (Mus musculus ES cells cDNA, RIKEN full-length enriched library, clo           | Q8VCZ8  | Q8VCZ8      | 1  | 1.41 | 1  | 0.85 |   |       |    |      |        |
| Rragc protein                                                                                 | Q99K70  | Q99K70      | 2  | 1.75 | 1  | 1.61 |   |       |    |      |        |
| RRM-type RNA-binding protein brPTB (Splicing regulator nPTB2)                                 | Q9QYC2  | Q9QYC2      |    |      |    |      | 1 | 16.04 |    |      |        |
| RuvB-like 2 (EC 3.6.1.-) (p47 protein)                                                        | Q9WTM5  | RUVB2_MOUSE | 2  | 1.11 | 1  | 0.85 | 1 | 2.06  |    |      | 20174  |
| Ryanodine receptor                                                                            | Q80X16  | Q80X16      | 1  | 1.59 |    |      |   |       |    |      |        |
| SAM and SH3 domain containing protein 1                                                       | P59808  | SASH1_MOUSE | 1  | 1.03 |    |      |   |       | 1  | 1.69 | 70097  |
| SAM domain and HD domain-containing protein 1 (Interferon-gamma inducible protei              | Q60710  | SAMH1_MOUSE | 10 | 1.18 | 9  | 1.08 | 3 | 1.27  | 4  | 0.95 | 56045  |
| Sarcoma amplified sequence (Mus musculus 11 days embryo whole body cDNA, RIK                  | Q9CQ88  | Q9CQ88      | 2  | 1.63 | 7  | 2.52 | 4 | 0.89  | 11 | 0.90 |        |
| Sarcoplasmic/endoplasmic reticulum calcium ATPase 2 (EC 3.6.3.8) (Calcium pump                | Q055143 | AT2A2_MOUSE | 22 | 1.23 | 25 | 1.25 | 6 | 1.02  | 17 | 0.90 | 11938  |
| Sarcosine dehydrogenase, mitochondrial precursor (EC 1.5.99.1) (SarDH)                        | Q99LB7  | SARDH_MOUSE | 1  | 1.60 | 1  | 2.06 |   |       |    |      | 192166 |
| Scavenger receptor class B member 1 (SRB1) (SR-BI)                                            | Q61009  | SCRB1_MOUSE | 1  | 2.77 |    |      |   |       |    |      | 20778  |
| Scavenger receptor class F member 2 precursor (Scavenger receptor expressed by e              | P59222  | SREC2_MOUSE |    |      |    |      |   |       | 4  | 0.52 | 224024 |
| Schlafen 10                                                                                   | Q7TME6  | Q7TME6      |    |      |    |      |   |       | 3  | 1.41 |        |
| Schwannoma-associated protein (Pld3 protein)                                                  | Q35405  | Q35405      | 1  | 1.27 |    |      | 1 | 1.45  |    |      |        |
| SCO-spondin                                                                                   | Q8CG65  | Q8CG65      | 1  | 3.69 |    |      |   |       |    |      |        |
| SDR1 protein                                                                                  | P97300  | P97300      | 1  | 2.06 | 3  | 1.17 | 1 | 0.99  |    |      |        |
| Sec1 family domain containing protein 1 (Syntaxin binding protein 1-like 2)                   | Q8BRF7  | SCFD1_MOUSE | 1  | 1.07 | 7  | 1.06 | 1 | 2.04  |    |      | 76983  |
| SEC10-like 1                                                                                  | Q80VK3  | Q80VK3      | 2  | 0.82 |    |      |   |       |    |      |        |
| SEC13-related protein (SEC13-like protein 1)                                                  | Q9D1M0  | SEC13_MOUSE | 7  | 1.47 | 4  | 3.91 | 2 | 6.23  |    |      | 110379 |
| Sec15l2 protein (Fragment)                                                                    | Q6PCN5  | Q6PCN5      |    |      | 1  | 0.55 | 1 | 1.41  |    |      |        |
| SEC23 interacting protein                                                                     | Q6NZC7  | S23IP_MOUSE | 1  | 2.03 | 1  | 1.13 |   |       |    |      | 207352 |
| SEC24 related gene family, member B                                                           | Q80ZX0  | Q80ZX0      | 2  | 0.48 | 2  | 0.38 | 1 | 3.48  | 2  | 1.53 |        |
| SEC24 related gene family, member D                                                           | Q6NXL1  | Q6NXL1      | 1  | 6.36 | 2  | 2.35 | 1 | 0.70  | 2  | 1.77 |        |
| Sec31l1 protein (Fragment)                                                                    | Q6IQZ3  | Q6IQZ3      | 4  | 1.31 | 5  | 0.90 | 3 | 1.46  | 6  | 1.26 |        |
| Secernin 1                                                                                    | Q9CZC8  | SCRN1_MOUSE | 6  | 2.82 | 9  | 1.45 | 1 | 2.31  | 9  | 0.97 | 69938  |
| Secreted frizzled-related protein 2 precursor (sFRP-2) (Secreted apoptosis relat              | P97299  | SFRP2_MOUSE | 1  | 1.57 | 1  | 1.44 |   |       | 2  | 0.76 |        |
| Sel-1 homolog precursor (Suppressor of lin-12-like protein) (Sel-1L)                          | Q9Z2G6  | SEL1L_MOUSE |    |      |    |      |   |       | 2  | 0.52 | 20338  |
| Selenide, water dikinase 1 (EC 2.7.9.3) (Selenophosphate synthetase 1) (Selenium d            | Q8BH69  | SPS1_MOUSE  | 1  | 2.51 |    |      |   |       |    |      | 109079 |
| Selenocysteine-specific elongation factor (Elongation factor sec) (mSelB)                     | Q9JHW4  | SELB_MOUSE  | 1  | 0.46 |    |      | 1 | 0.88  |    |      | 65967  |
| Semaphorin 4C precursor (Semaphorin I) (Sema I) (Semaphorin C-like 1) (M-Sema                 | Q64151  | SEM4C_MOUSE | 1  | 8.81 |    |      |   |       |    |      | 20353  |
| Senataxin                                                                                     | Q6IMG6  | Q6IMG6      | 1  | 0.08 |    |      | 1 | 0.03  | 1  | 0.21 |        |
| Sentrin-specific protease 2 (EC 3.4.22.-) (Sentrin/SUMO-specific protease SENP2) (S           | Q91ZX6  | SEN2_MOUSE  |    |      | 1  | 2.03 |   |       |    |      | 75826  |
| Sentrin-specific protease 3 (EC 3.4.22.-) (Sentrin/SUMO-specific protease SENP3) (S           | Q9EP97  | SEN3_MOUSE  |    |      |    |      |   |       | 2  | 0.68 | 80886  |
| Separin (EC 3.4.22.49) (Separase) (Caspase-like protein ESPL1) (Extra spindle pole            | P60330  | ESPL1_MOUSE |    |      |    |      | 1 | 0.50  |    |      | 105988 |
| Sepiapterin reductase (EC 1.1.1.153) (SPR)                                                    | Q64105  | SPRE_MOUSE  |    |      |    |      |   |       | 2  | 1.54 | 20751  |
| Septin 11                                                                                     | Q8C1B7  | SEP11_MOUSE | 6  | 1.61 | 6  | 1.05 | 9 | 1.38  | 4  | 1.26 | 52398  |
| Septin 2 (NEDD5 protein)                                                                      | P42208  | SEPT2_MOUSE | 2  | 1.64 | 5  | 1.33 | 3 | 0.70  | 5  | 2.24 | 18000  |
| Septin 7 (CDC10 protein homolog)                                                              | O55131  | SEPT7_MOUSE | 9  | 1.35 | 8  | 1.14 | 4 | 1.54  | 9  | 1.11 | 235072 |
| Septin 8                                                                                      | Q8CHH9  | SEPT8_MOUSE | 1  | 1.15 | 2  | 1.26 | 2 | 2.51  |    |      | 20362  |

|                                                                                            |        |             |    |      |    |       |   |      |  |    |       |        |
|--------------------------------------------------------------------------------------------|--------|-------------|----|------|----|-------|---|------|--|----|-------|--------|
| Septin 9 (SL3-3 integration site 1 protein)                                                | Q80UG5 | SEPT9_MOUSE | 1  | 1.59 | 1  | 1.20  |   |      |  |    | 53860 |        |
| Serine hydroxymethyltransferase, cytosolic (EC 2.1.2.1) (Serine methylase) (Glycine        | P50431 | GLYC_MOUSE  | 1  | 1.18 | 2  | 1.91  | 2 | 1.41 |  | 2  | 1.98  | 20425  |
| Serine palmitoyltransferase 2 (EC 2.3.1.50) (Long chain base biosynthesis protein 2)       | P97363 | LCB2_MOUSE  | 2  | 0.61 | 1  | 0.83  |   |      |  |    |       | 20773  |
| Serine/threonine phosphatase 4 regulatory subunit 1                                        | Q8K2V1 | PP4R1_MOUSE |    |      | 1  | 1.64  | 4 | 2.41 |  |    |       | 70351  |
| Serine/threonine protein phosphatase 4 catalytic subunit (EC 3.1.3.16) (PP4C) (Pp4)        | P97470 | PP4C_MOUSE  | 2  | 1.19 | 3  | 1.77  |   |      |  | 1  | 0.68  | 56420  |
| Serine/threonine protein phosphatase 5 (EC 3.1.3.16) (PP5) (Protein phosphatase T)         | Q60676 | PPP5_MOUSE  | 2  | 1.20 | 3  | 4.87  |   |      |  |    |       | 19060  |
| Serine/threonine protein phosphatase 6 (EC 3.1.3.16) (PP6)                                 | Q9CQR6 | PPP6_MOUSE  | 2  | 1.28 |    |       | 3 | 1.49 |  | 2  | 1.07  | 67857  |
| Serine/threonine protein phosphatase PP1-beta catalytic subunit (EC 3.1.3.16) (PP-1f)      | P62141 | PP1B_MOUSE  | 1  | 1.49 | 6  | 1.10  | 3 | 1.27 |  | 3  | 1.49  | 19046  |
| Serine/threonine-protein kinase 19 (EC 2.7.1.37) (RP1 protein)                             | Q9JHN8 | STK19_MOUSE |    |      | 1  | 1.20  |   |      |  |    |       | 54402  |
| Serine/threonine-protein kinase 24 (EC 2.7.1.37)                                           | Q99KH8 | STK24_MOUSE | 4  | 1.68 | 2  | 0.97  |   |      |  | 3  | 1.36  | 223255 |
| Serine/threonine-protein kinase 6 (EC 2.7.1.37) (Aurora-family kinase 1) (Aurora/IPL1      | P97477 | STK6_MOUSE  | 1  | 5.95 |    |       |   |      |  |    |       | 20878  |
| Serine/threonine-protein kinase LKB1 (Serine/threonine kinase 11) (Peutz-Jeghers sy        | Q9WTK7 | Q9WTK7      | 6  | 0.20 | 4  | 0.03  | 3 | 0.06 |  | 6  | 0.65  |        |
| Serine/threonine-protein kinase Nek6 (EC 2.7.1.37) (NimA-related protein kinase 6)         | Q9ES70 | NEK6_MOUSE  | 1  | 2.35 |    |       | 2 | 4.48 |  |    |       | 59126  |
| Serine/threonine-protein kinase Nek7 (EC 2.7.1.37) (NimA-related protein kinase 7)         | Q9ES74 | NEK7_MOUSE  | 1  | 1.95 |    |       |   |      |  |    |       | 59125  |
| Serine/threonine-protein kinase PRP4 homolog (EC 2.7.1.37) (PRP4 pre-mRNA proc             | Q61136 | PRP4B_MOUSE | 2  | 1.21 |    |       |   |      |  |    |       | 19134  |
| Serine/threonine-protein kinase SNF1-like kinase 1 (EC 2.7.1.37) (Serine/threonine-pi      | Q60670 | SN1L1_MOUSE |    |      | 1  | 4.09  |   |      |  |    |       | 17691  |
| Serine-protein kinase ATM (EC 2.7.1.37) (Ataxia telangiectasia mutated homolog) (A-        | Q62388 | ATM_MOUSE   |    |      |    |       |   |      |  | 1  | 0.56  | 11920  |
| Serine-protein kinase ATR (EC 2.7.1.37) (Ataxia telangiectasia and Rad3 related prot       | Q9JJK8 | ATR_MOUSE   | 1  | 0.87 |    |       |   |      |  |    |       |        |
| Serine-threonine kinase receptor-associated protein (UNR-interacting protein)              | Q9Z1Z2 | STRAP_MOUSE | 6  | 1.13 | 6  | 1.10  | 2 | 1.41 |  | 4  | 1.20  | 20901  |
| Serologically defined colon cancer antigen 1                                               | Q8CCP0 | SDCG1_MOUSE |    |      | 1  | 1.15  |   |      |  |    |       | 66244  |
| Serpinb3c                                                                                  | Q6UKZ1 | Q6UKZ1      |    |      |    |       | 1 | 0.29 |  |    |       |        |
| Serum albumin precursor                                                                    | P07724 | ALBU_MOUSE  | 4  | 2.07 | 14 | 21.69 | 4 | 0.46 |  | 21 | 5.75  | 11657  |
| SET and MYND domain containing 5                                                           | Q91YL6 | Q91YL6      |    |      | 1  | 3.16  |   |      |  |    |       |        |
| SGT1 protein homolog                                                                       | Q9CS74 | SGT1_MOUSE  | 3  | 1.07 | 2  | 0.41  |   |      |  |    |       | 70601  |
| SH3 domain GRB2-like protein B2 (Endophilin B2)                                            | Q8R3V5 | SHLB2_MOUSE | 3  | 0.96 | 2  | 0.75  | 2 | 1.55 |  |    |       | 227700 |
| SH3 domain-binding glutamic acid-rich-like protein                                         | Q9JJU8 | SH3L1_MOUSE | 2  | 2.58 |    |       | 1 | 0.56 |  |    |       | 56726  |
| Shc binding protein (Shc SH2-domain binding protein 1)                                     | Q9Z179 | Q9Z179      | 1  | 5.10 |    |       |   |      |  | 2  | 2.99  |        |
| Short chain 3-hydroxyacyl-CoA dehydrogenase, mitochondrial precursor (EC 1.1.1.35          | Q61425 | HCDH_MOUSE  | 2  | 1.37 | 3  | 1.03  |   |      |  |    |       | 15107  |
| Shwachman-Bodian-Diamond syndrome protein homolog (Protein 22A3)                           | P70122 | SBDS_MOUSE  | 3  | 1.36 | 3  | 1.41  |   |      |  | 1  | 4.93  | 66711  |
| Sialate O-acetyltransferase precursor (EC 3.1.1.53) (Sialic acid-specific 9-O-acetyl ester | P70665 | YSG2_MOUSE  |    |      |    |       |   |      |  | 2  | 0.64  | 22619  |
| Signal peptide peptidase-like 2A (EC 3.4.99.-) (SPP-like 2A protein) (SPPL2a protein)      | Q9JJF9 | PSL2_MOUSE  | 4  | 1.18 | 6  | 1.07  | 3 | 0.76 |  | 5  | 0.82  | 66552  |
| Signal recognition particle 68 kDa protein (SRP68)                                         | Q8BMA6 | SRP68_MOUSE | 8  | 1.58 | 3  | 1.07  | 2 | 1.53 |  | 3  | 1.45  | 217337 |
| Signal recognition particle 9 kDa protein (SRP9)                                           | P49962 | SRP09_MOUSE | 1  | 1.23 | 3  | 0.93  |   |      |  |    |       | 27058  |
| Signal recognition particle receptor beta subunit (SR-beta)                                | P47758 | SRPB_MOUSE  | 1  | 0.97 |    |       |   |      |  |    |       | 20818  |
| Signal transducer and activator of transcription 3 (Acute-phase response factor)           | P42227 | STAT3_MOUSE | 6  | 1.67 | 7  | 1.44  | 4 | 1.55 |  | 8  | 1.43  | 20848  |
| Signal transducer and transcription activator 6                                            | P52633 | STAT6_MOUSE | 1  | 1.01 |    |       |   |      |  |    |       | 20852  |
| Signal-induced proliferation-associated 1 like protein 1                                   | Q8C0T5 | SI1L1_MOUSE |    |      |    |       |   |      |  | 1  | 0.27  | 217692 |
| Signal-induced proliferation-associated 1 like protein 2 (Fragment)                        | Q80TE4 | SI1L2_MOUSE |    |      | 1  | 0.31  |   |      |  |    |       | 244668 |
| Similar to ankyrin 2, neuronal (Fragment)                                                  | Q80ZZ7 | Q80ZZ7      |    |      | 1  | 0.55  |   |      |  |    |       |        |
| Similar to human C20orf194 protein                                                         | Q7TT23 | Q7TT23      | 1  | 2.40 |    |       |   |      |  | 2  | 1.99  |        |
| Similar to human DKFZp566O084 protein (Mus musculus 13 days embryo heart cDN               | Q99J47 | Q99J47      | 1  | 1.05 | 3  | 0.95  |   |      |  | 1  | 1.19  |        |
| Similar to KIAA1012 protein (Fragment)                                                     | Q811K7 | Q811K7      | 1  | 0.74 | 1  | 3.58  |   |      |  |    |       |        |
| Similar to mesenchymal stem cell protein DSCD75                                            | Q80ZW2 | Q80ZW2      | 3  | 1.79 | 2  | 1.23  |   |      |  |    |       |        |
| Similar to methylcrotonoyl-Coenzyme A carboxylase 2 (Beta)                                 | Q8K1L7 | Q8K1L7      | 1  | 1.06 |    |       |   |      |  |    |       |        |
| Similar to RIKEN cDNA 2010107D16 gene                                                      | Q99L29 | Q99L29      |    |      | 1  | 1.72  |   |      |  |    |       |        |
| Sjogren's syndrome nuclear autoantigen 1 homolog                                           | Q9JJ94 | SSNA1_MOUSE | 1  | 2.01 | 1  | 1.70  |   |      |  |    |       | 68475  |
| Skeletal muscle LIM-protein 1 (SLIM 1) (Four and a half LIM domains protein 1) (FHL-       | P97447 | SLIM1_MOUSE |    |      | 1  | 3.90  |   |      |  | 3  | 1.89  | 14199  |
| Skeletal muscle LIM-protein 2 (SLIM 2) (Four and a half LIM domains protein 3) (FHL-       | Q9R059 | SLIM2_MOUSE | 2  | 7.90 | 6  | 2.92  | 2 | 1.16 |  | 8  | 1.56  | 14201  |
| Skeletal muscle LIM-protein 3 (SLIM 3) (LIM-domain protein DRAL) (Four and a half          | Q70433 | SLIM3_MOUSE | 7  | 3.36 | 13 | 3.31  | 2 | 2.17 |  | 23 | 1.77  | 14200  |
| SLC26A8 anion exchanger                                                                    | Q812C7 | Q812C7      |    |      | 1  | 0.03  |   |      |  |    |       |        |
| Slingshot-like 3 (Slingshot-3L)                                                            | Q8K330 | Q8K330      | 1  | 2.93 |    |       |   |      |  |    |       |        |
| Slit homolog 2 protein precursor (Slit-2)                                                  | Q9R1B9 | SLIT2_MOUSE | 4  | 1.64 | 6  | 2.42  | 2 | 1.76 |  | 9  | 1.13  | 20563  |
| Small glutamine-rich tetratricopeptide repeat-containing protein A                         | Q8BJU0 | SGTA_MOUSE  | 8  | 1.39 | 5  | 0.78  | 1 | 0.44 |  | 1  | 0.73  | 52551  |
| Small nuclear ribonucleoprotein Sm D2 (snRNP core protein D2) (Sm-D2)                      | P62317 | SMD2_MOUSE  | 6  | 1.23 | 7  | 1.43  | 2 | 1.14 |  | 2  | 0.93  |        |
| Small nuclear ribonucleoprotein Sm D3 (snRNP core protein D3) (Sm-D3)                      | P62320 | SMD3_MOUSE  | 1  | 1.00 |    |       | 1 | 1.23 |  |    |       |        |
| SMC6 protein (SMC6 structural maintenance of chromosomes 6-like 1) (Yeast)                 | Q924W5 | Q924W5      | 2  | 0.07 | 2  | 0.11  | 1 | 0.10 |  | 3  | 0.25  |        |
| Smith-Magenis syndrome chromosome region, candidate 7 homolog (Human)                      | Q5NCS9 | Q5NCS9      |    |      |    |       | 1 | 0.19 |  |    |       |        |
| Smoothed homolog precursor (SMO)                                                           | P56726 | SMO_MOUSE   |    |      | 1  | 2.24  |   |      |  | 1  | 7.49  | 319757 |
| SNF7 domain containing protein 2                                                           | Q9D7S9 | SNF72_MOUSE | 1  | 3.70 |    |       |   |      |  |    |       | 76959  |
| Sodium/myo-inositol cotransporter (Na(+)/myo-inositol cotransporter)                       | Q9JKZ2 | SC5A3_MOUSE | 1  | 0.79 | 1  | 0.73  |   |      |  | 1  | 1.10  | 53881  |
| Sodium/potassium-transporting ATPase alpha-1 chain precursor (EC 3.6.3.9) (Sodiur          | Q8VDN2 | AT1A1_MOUSE | 10 | 1.20 | 10 | 1.57  | 4 | 1.40 |  | 3  | 1.77  | 11928  |

|                                                                                                  |             |    |      |   |      |    |      |   |      |       |   |       |        |
|--------------------------------------------------------------------------------------------------|-------------|----|------|---|------|----|------|---|------|-------|---|-------|--------|
| Sodium/potassium-transporting ATPase beta-1 chain (Sodium/potassium-dependent , P14094           | AT1B1_MOUSE | 2  | 1.19 |   |      |    |      |   |      |       |   | 11931 |        |
| Sodium/potassium-transporting ATPase beta-3 chain (Sodium/potassium-dependent , P97370           | AT1B3_MOUSE | 6  | 1.33 |   |      |    |      |   |      |       |   | 11933 |        |
| Solute carrier family 12, member 2 (Bumetanide-sensitive sodium-(potassium)-chlorid P55012       | S12A2_MOUSE |    |      | 1 | 0.47 |    |      | 2 | 1.19 |       | 5 | 1.22  | 20496  |
| Solute carrier family 12, member 4 (Electroneutral potassium-chloride cotransporter 1 Q9JIS8     | S12A4_MOUSE | 3  | 0.64 |   |      | 4  | 1.50 |   |      |       |   |       | 20498  |
| Solute carrier family 2, facilitated glucose transporter, member 4 (Glucose transporter P14142   | GTR4_MOUSE  | 1  | 8.54 |   |      |    |      |   |      |       |   |       | 20528  |
| Solute carrier family 25, member 1                                                               | Q8JZU2      | 2  | 2.35 |   |      | 1  | 1.26 |   | 1    | 1.40  |   | 3     | 2.25   |
| Solute carrier family 29 (Nucleoside transporters), member 4                                     | Q8R139      |    |      |   |      |    |      |   |      |       |   | 1     | 2.08   |
| Solute carrier organic anion transporter family, member 4A1 (Solute carrier family 21, Q8K078    | SO4A1_MOUSE |    |      |   |      | 1  | 7.12 |   |      |       |   |       | 108115 |
| Son of sevenless protein homolog 1 (SOS-1) (mSOS-1)                                              | Q62245      |    |      |   |      | 1  | 2.40 |   | 1    | 3.99  |   |       | 20662  |
| Sorbitol dehydrogenase (EC 1.1.1.14) (L-iditol 2-dehydrogenase) (Fragment)                       | Q64442      | 2  | 1.98 |   |      |    |      |   | 1    | 0.45  |   |       | 20322  |
| Sorting nexin 1                                                                                  | Q9WV80      | 1  | 0.96 |   |      |    |      |   | 1    | 1.45  |   |       | 56440  |
| Sorting nexin 2                                                                                  | Q9CWK8      | 2  | 1.69 |   |      | 1  | 0.64 |   |      |       |   | 2     | 1.28   |
| Sorting nexin 4                                                                                  | Q91YJ2      | 4  | 1.40 |   |      | 2  | 0.90 |   |      |       |   |       |        |
| Sorting nexin 5                                                                                  | Q9D8U8      | 9  | 1.79 |   |      | 9  | 1.27 |   | 2    | 1.32  |   | 3     | 1.37   |
| Sorting nexin 9                                                                                  | Q91VH2      | 2  | 1.32 |   |      | 5  | 1.06 |   | 4    | 1.92  |   | 4     | 1.48   |
| SPARC precursor (Secreted protein acidic and rich in cysteine) (Osteonectin) (ON) (B P07214      | SPRC_MOUSE  | 12 | 1.32 |   |      | 15 | 1.68 |   | 5    | 1.45  |   | 11    | 1.81   |
| Spartin                                                                                          | Q8R1X6      |    |      |   |      | 1  | 1.54 |   |      |       |   | 3     | 1.39   |
| Spectrin alpha chain, brain (Spectrin, non-erythroid alpha chain) (Alpha-II spectrin) (Fi P16546 | SPTA2_MOUSE | 2  | 1.30 |   |      | 4  | 1.59 |   | 1    | 0.79  |   |       | 20740  |
| Spermatid-specific thioredoxin-2 protein                                                         | Q715T0      |    |      |   |      |    |      |   |      |       |   | 1     | 3.63   |
| Spermidine synthase (EC 2.5.1.16) (Putrescine aminopropyltransferase) (SPDSY) Q64674             | SPEE_MOUSE  |    |      |   |      |    |      |   | 1    | 0.05  |   |       | 20810  |
| Spermine synthase (EC 2.5.1.22) (Spermidine aminopropyltransferase) (SPMSY) P97355               | SPSY_MOUSE  | 1  | 4.17 |   |      |    |      |   |      |       |   |       | 20603  |
| S-phase kinase-associated protein 1A (Cyclin A/CDK2-associated protein p19) (p19A Q9WTX5         | SKP1_MOUSE  | 6  | 1.79 |   |      | 4  | 1.46 |   | 1    | 2.79  |   | 3     | 0.92   |
| S-phase kinase-associated protein 2 (F-box protein Skp2) (Cyclin A/CDK2-associated Q9Z0Z3        | SKP2_MOUSE  | 1  | 0.11 |   |      |    |      |   |      |       |   |       | 27401  |
| Sphingomyelin phosphodiesterase 2 (EC 3.1.4.12) (Neutral sphingomyelinase) (nSMε O70572          | NSMA_MOUSE  |    |      |   |      | 1  | 1.08 |   |      |       |   | 3     | 0.73   |
| SPI6 (Serine (Or cysteine) proteinase inhibitor, clade B, member 9) (Mus musculus ac O08797      | O08797      | 2  | 2.96 |   |      | 1  | 1.56 |   | 1    | 1.97  |   |       |        |
| Spliceosome RNA helicase Bat1 (DEAD-box protein UAP56) (56 kDa U2AF65 associ: Q9Z1N5             | UAP56_MOUSE | 19 | 1.32 |   |      | 28 | 1.16 |   | 10   | 1.10  |   | 18    | 1.23   |
| Splicing factor 1 (Zinc finger protein 162) (Transcription factor ZFM1) (mZFM) (Zinc fir Q64213  | SF01_MOUSE  | 3  | 3.23 |   |      | 4  | 2.87 |   | 3    | 1.08  |   | 4     | 1.39   |
| Splicing factor 3A subunit 3 (Spliceosome associated protein 61) (SAP 61) (SF3a60) Q9D554        | SF3A3_MOUSE | 1  | 0.72 |   |      | 1  | 1.14 |   |      |       |   | 4     | 1.25   |
| Splicing factor 3B subunit 1 (Spliceosome associated protein 155) (SAP 155) (SF3b1: Q99NB9       | SF3B1_MOUSE | 8  | 1.11 |   |      | 7  | 2.07 |   | 3    | 0.75  |   | 11    | 1.38   |
| Splicing factor 45 (45kDa splicing factor) (RNA binding motif protein 17) Q8JZX4                 | SPF45_MOUSE | 1  | 0.56 |   |      |    |      |   |      |       |   |       | 76938  |
| Splicing factor U2AF 35 kDa subunit (U2 auxiliary factor 35 kDa subunit) (U2 snRNP ε Q9D883      | U2AF1_MOUSE | 4  | 1.05 |   |      | 4  | 3.39 |   | 1    | 0.88  |   | 4     | 1.27   |
| Sporulation-induced transcript 4-associated protein (Mus musculus adult male urinary Q922D4      | Q922D4      | 4  | 1.75 |   |      | 2  | 0.72 |   |      |       |   | 2     | 1.59   |
| Sprouty-related, EVH1 domain containing protein 1 (Spred-1) Q924S8                               | SPRE1_MOUSE |    |      |   |      | 1  | 3.72 |   |      |       |   |       |        |
| Squalene monooxygenase (EC 1.14.99.7) (Squalene epoxidase) (SE) P52019                           | ERG1_MOUSE  | 1  | 4.94 |   |      |    |      |   |      |       |   |       | 20775  |
| Squamous cell carcinoma antigen recognized by T-cells 1 Q8K155                                   | Q8K155      | 2  | 3.00 |   |      | 1  | 0.98 |   |      |       |   |       |        |
| Staphylococcal nuclease domain containing protein 1 (p100 co-activator) (100 kDa co Q78PY7       | SND1_MOUSE  | 16 | 1.47 |   |      | 22 | 1.11 |   | 7    | 1.40  |   | 15    | 1.23   |
| StAR-related lipid transfer protein 5 (StARD5) (START domain-containing protein 5) Q9EPQ7        | STAR5_MOUSE | 1  | 1.74 |   |      |    |      |   |      |       |   | 1     | 2.66   |
| Sterol-4-alpha-carboxylate 3-dehydrogenase, decarboxylating (EC 1.1.1.170) Q9R1J0                | NSDHL_MOUSE | 6  | 1.13 |   |      | 7  | 1.37 |   | 1    | 0.93  |   | 3     | 1.10   |
| Steryl-sulfatase precursor (EC 3.1.6.2) (Steroid sulfatase) (Steryl-sulfate sulfohydrola: P50427 | STS_MOUSE   | 1  | 1.24 |   |      |    |      |   |      |       |   |       | 20905  |
| Stonin 1 (Stoned B-like factor) Q8CDJ8                                                           | SALF_MOUSE  | 1  | 0.43 |   |      | 4  | 0.76 |   | 3    | 1.43  |   | 3     | 0.86   |
| Stress-70 protein, mitochondrial precursor (75 kDa glucose regulated protein) (GRP 7 P38647      | GRP75_MOUSE | 7  | 1.38 |   |      | 7  | 1.03 |   | 1    | 1.59  |   | 2     | 0.90   |
| Stress-induced-phosphoprotein 1 (ST1) (Hsc70/Hsp90-organizing protein) (Hop) (mS Q60864          | STIP1_MOUSE | 19 | 1.78 |   |      | 14 | 1.05 |   | 5    | 1.54  |   | 4     | 1.18   |
| Striated muscle-specific serine/threonine protein kinase Q9EQJ5                                  | Q9EQJ5      |    |      |   |      | 1  | 0.43 |   |      |       |   |       |        |
| Striatin O55106                                                                                  | STRN_MOUSE  | 1  | 0.38 |   |      |    |      |   |      |       |   |       | 268980 |
| Stromal cell-derived factor 2-like protein 1 precursor (SDF2 like protein 1) Q9ESP1              | SDF2L_MOUSE | 3  | 0.68 |   |      | 3  | 0.60 |   |      |       |   |       | 64136  |
| Stromal membrane-associated protein 1 Q91VZ6                                                     | Q91VZ6      |    |      |   |      | 1  | 2.58 |   |      |       |   | 2     | 1.32   |
| Structural maintenance of chromosome 1-like 1 protein (SMC1alpha protein) (Chromc Q9CU62         | SMC1A_MOUSE | 4  | 1.98 |   |      | 4  | 1.42 |   |      |       |   | 3     | 1.05   |
| Structural maintenance of chromosome 2-like 1 protein (Chromosome-associated pro Q8CG48          | SMC2_MOUSE  | 2  | 1.56 |   |      |    |      |   |      |       |   | 1     | 0.86   |
| Structural maintenance of chromosome 3 (Chondroitin sulfate proteoglycan 6) (Chorr Q9CW03        | SMC3_MOUSE  | 1  | 1.50 |   |      | 1  | 1.26 |   |      |       |   |       | 13006  |
| Structural maintenance of chromosomes 1-like 2 protein (SMC1beta protein) Q920F6                 | SM1L2_MOUSE |    |      |   |      |    |      |   |      |       |   | 1     | 0.31   |
| Structural maintenance of chromosomes 4-like 1 protein (Chromosome-associated pc Q8CG47          | SMC4_MOUSE  |    |      |   |      | 1  | 0.34 |   | 2    | 1.16  |   | 1     | 0.95   |
| Succinate dehydrogenase [ubiquinone] flavoprotein subunit, mitochondrial precursor ( Q8K2B3      | DHSA_MOUSE  | 23 | 2.22 |   |      | 19 | 2.00 |   | 7    | 1.10  |   | 13    | 2.49   |
| Succinate dehydrogenase [ubiquinone] iron-sulfur protein, mitochondrial precursor (Ei Q9CQA3     | DHSB_MOUSE  | 2  | 1.38 |   |      | 1  | 2.33 |   | 1    | 1.26  |   | 3     | 9.92   |
| Succinate dehydrogenase cytochrome b560 subunit, mitochondrial precursor (Integra Q9CZB0         | C560_MOUSE  |    |      |   |      | 1  | 1.46 |   |      |       |   |       | 66052  |
| Succinate semialdehyde dehydrogenase, mitochondrial precursor (EC 1.2.1.24) (NAC Q8BWF0          | SSDH_MOUSE  | 1  | 0.47 |   |      |    |      |   | 1    | 0.72  |   | 1     | 1.27   |
| Succinyl-CoA ligase [ADP-forming] beta-chain, mitochondrial precursor (EC 6.2.1.5) (: Q9Z219     | SUCB1_MOUSE | 7  | 1.42 |   |      | 12 | 1.73 |   | 6    | 1.22  |   | 5     | 1.21   |
| Succinyl-CoA ligase [GDP-forming] alpha-chain, mitochondrial precursor (EC 6.2.1.4) Q9WUM5       | SUCA_MOUSE  | 13 | 1.45 |   |      | 18 | 1.26 |   | 10   | 53.36 |   | 9     | 0.95   |
| Succinyl-CoA:3-ketoacid-coenzyme A transferase 1, mitochondrial precursor (EC 2.8. Q9D0K2        | SCOT_MOUSE  | 8  | 1.14 |   |      | 5  | 1.21 |   | 4    | 1.16  |   | 4     | 1.09   |
| Suclg2 protein Q66JT3                                                                            | Q66JT3      | 1  | 1.59 |   |      |    |      |   |      |       |   |       |        |
| Sulfatase modifying factor 1 precursor (C-alpha-formylglycine-generating enzyme 1) Q8R0F3        | SUMF1_MOUSE | 3  | 1.59 |   |      | 2  | 1.25 |   | 1    | 0.63  |   |       | 58911  |
| Sulfated glycoprotein 1 precursor (SGP-1) (Prosaposin) Q61207                                    | SAP_MOUSE   | 36 | 1.65 |   |      | 65 | 1.46 |   | 29   | 1.33  |   | 36    | 1.13   |

|                                                                                         |        |              |    |        |    |       |    |      |    |       |  |        |
|-----------------------------------------------------------------------------------------|--------|--------------|----|--------|----|-------|----|------|----|-------|--|--------|
| Sulfide:quinone oxidoreductase, mitochondrial precursor (EC 1.-.-.)                     | Q9R112 | SQRD_MOUSE   | 6  | 1.34   | 3  | 1.62  |    |      |    |       |  | 59010  |
| Sulfotransferase family cytosolic 2B member 1 (EC 2.8.2.2) (Sulfotransferase 2B1) (S    | O35400 | ST2B1_MOUSE  | 1  | 1.43   | 1  | 1.06  |    |      |    |       |  | 54200  |
| Supervillin (Archvillin) (p205/p250)                                                    | Q8K4L3 | SVIL_MOUSE   |    |        |    |       | 1  | 0.13 |    |       |  |        |
| Suppressor of fused homolog                                                             | Q9Z0P7 | SUFU_MOUSE   | 1  | 0.22   |    |       |    |      |    |       |  |        |
| Suppressor of G2 allele of SKP1 homolog                                                 | Q9CX34 | SUGT1_MOUSE  | 4  | 1.52   | 6  | 1.11  | 2  | 1.89 |    |       |  | 67955  |
| Suppressor of SWI4 1 homolog (Ssf-1) (Peter Pan homolog)                                | Q91YU8 | SSF1_MOUSE   | 1  | 0.40   |    |       |    |      |    |       |  | 235036 |
| Suppressor of Ty 6 homolog protein (Chromatin structural protein)                       | Q62383 | SUP6H_MOUSE  | 3  | 5.76   | 4  | 1.45  | 2  | 1.97 | 4  | 0.81  |  | 20926  |
| Suppressor of var1, 3-like 1                                                            | Q80YD1 | Q80YD1       |    |        | 2  | 1.13  |    |      |    |       |  |        |
| Surfeit locus protein 2 (Surf-2)                                                        | P09926 | SURF2_MOUSE  | 1  | 3.88   | 2  | 1.16  |    |      | 2  | 1.23  |  | 20931  |
| Surfeit locus protein 4                                                                 | Q64310 | SURF4_MOUSE  | 31 | 1.55   | 34 | 1.55  | 5  | 1.28 | 6  | 1.07  |  | 20932  |
| SWI/SNF related matrix-associated actin-dependent regulator of chromatin subfamily      | P97496 | SMRC1_MOUSE  | 1  | 1.27   | 1  | 0.98  |    |      |    |       |  | 20588  |
| SWI/SNF-related matrix-associated actin-dependent regulator of chromatin subfamily      | Q6PDG5 | SMRC2_MOUSE  | 7  | 1.40   | 5  | 1.76  | 2  | 0.68 | 2  | 0.38  |  | 68094  |
| SWI/SNF-related, matrix associated, actin-dependent regulator of chromatin subfamili    | Q04692 | SMRCD_MOUSE  |    |        | 1  | 0.05  | 2  | 1.71 |    |       |  | 13990  |
| Sympk protein                                                                           | Q80X82 | Q80X82       |    |        | 2  | 3.09  |    |      |    |       |  |        |
| Synaptic glycoprotein SC2                                                               | Q9CY27 | GPSN2_MOUSE  | 2  | 1.65   | 1  | 1.37  |    |      |    |       |  | 106529 |
| Synaptic vesicle membrane protein VAT-1 homolog (EC 1.-.-.)                             | Q62465 | VAT1_MOUSE   | 23 | 1.33   | 28 | 1.48  | 5  | 1.77 | 9  | 0.91  |  | 26949  |
| Synaptobrevin-like protein (Synaptobrevin like 1) (Mus musculus adult male kidney c     | P70280 | P70280       |    |        | 1  | 0.50  | 4  | 0.98 | 2  | 0.08  |  |        |
| Synaptonemal complex protein SC65                                                       | Q8K2B0 | Q8K2B0       | 1  | 1.39   | 1  | 2.09  |    |      | 2  | 1.63  |  |        |
| Synembryn (Mus musculus 13 days embryo male testis cDNA, RIKEN full-length enric        | Q9ERR6 | Q9ERR6       | 1  | 2.32   | 1  | 2.10  | 1  | 2.28 | 1  | 3.94  |  |        |
| Syntaxin binding protein 1 (Unc-18 homolog) (Unc-18A) (Unc-18-1)                        | O08599 | STXB1_MOUSE  | 3  | 0.93   |    |       |    |      |    |       |  | 20910  |
| Syntaxin binding protein 3 (UNC-18 homolog 3) (UNC-18C) (MUNC-18-3)                     | Q60770 | STXB3_MOUSE  | 2  | 1.25   | 1  | 0.57  | 1  | 0.81 | 3  | 0.84  |  | 20912  |
| Syntaxin-12                                                                             | Q9ER00 | STX12_MOUSE  | 4  | 1.38   | 4  | 0.87  | 3  | 0.89 |    |       |  | 100226 |
| Syntaxin-1B2 (Syntaxin 1B)                                                              | P61264 | STX1C_MOUSE  | 1  | 108.95 | 1  | 19.76 |    |      | 1  | 9.81  |  | 56216  |
| Syntaxin-5                                                                              | Q8K1E0 | STX5_MOUSE   |    |        | 1  | 0.97  |    |      |    |       |  | 56389  |
| T lymphocyte activation antigen CD80 precursor (Activation B7-1 antigen) (B7)           | Q00609 | CD80_MOUSE   | 1  | 1.08   |    |       |    |      |    |       |  | 12519  |
| TATA-box binding protein (TATA-box factor) (TATA binding factor) (TATA sequence-t       | P29037 | TBP_MOUSE    | 1  | 0.21   |    |       |    |      | 1  | 0.13  |  | 21374  |
| TBC1 domain family member 1                                                             | Q60949 | TBCD1_MOUSE  |    |        | 1  | 0.45  |    |      | 1  | 12.71 |  | 57915  |
| T-box transcription factor TBX15 (T-box protein 15) (MmTBx8)                            | O70306 | TBX15_MOUSE  |    |        |    |       |    |      | 1  | 2.63  |  | 21384  |
| T-cell immunomodulatory protein precursor (TIP protein)                                 | Q99KW9 | TIP_MOUSE    |    |        | 1  | 3.10  |    |      | 1  | 0.84  |  | 71927  |
| T-complex associated-testis-expressed 1-like (Protein 91/23)                            | P56387 | TCT1L_MOUSE  | 1  | 2.01   |    |       |    |      | 1  | 0.26  |  | 67117  |
| T-complex protein 1, alpha subunit B (TCP-1-alpha) (CCT-alpha) (Tailless complex p      | P11983 | TCPA2_MOUSE  | 2  | 1.20   | 3  | 0.91  |    |      | 1  | 1.40  |  | 21454  |
| T-complex protein 1, beta subunit (TCP-1-beta) (CCT-beta)                               | P80314 | TCPB_MOUSE   | 6  | 1.22   | 7  | 1.94  | 2  | 1.46 | 1  | 2.34  |  | 12461  |
| T-complex protein 1, delta subunit (TCP-1-delta) (CCT-delta) (A45)                      | P80315 | TCPD_MOUSE   | 26 | 1.35   | 18 | 1.03  | 16 | 1.61 | 6  | 1.45  |  | 12464  |
| T-complex protein 1, eta subunit (TCP-1-eta) (CCT-eta)                                  | P80313 | TCPH_MOUSE   | 8  | 1.18   | 11 | 1.00  | 4  | 1.40 | 5  | 1.26  |  | 12468  |
| T-complex protein 1, gamma subunit (TCP-1-gamma) (CCT-gamma) (Matricin)                 | P80318 | TCPG_MOUSE   | 23 | 1.27   | 41 | 0.82  | 6  | 1.08 | 10 | 0.91  |  | 12462  |
| Tenc1 protein                                                                           | Q8CGB6 | Q8CGB6       | 1  | 1.26   |    |       | 1  | 1.16 | 2  | 1.21  |  |        |
| Testase 4                                                                               | Q8K4K0 | Q8K4K0       |    |        |    |       |    |      | 1  | 0.20  |  |        |
| Testis-specific Y-encoded-like protein 1 (TSPY-like 1)                                  | Q88852 | TSYL1_MOUSE  |    |        |    |       |    |      | 1  | 1.29  |  | 22110  |
| Testosterone-regulated RP2 protein (Androgen regulated protein RP2)                     | P11930 | RP2_MOUSE    |    |        | 2  | 1.86  | 1  | 0.28 |    |       |  | 110959 |
| Tetratricopeptide repeat protein 1 (TPR repeat protein 1)                               | Q91Z38 | TTC1_MOUSE   | 1  | 2.02   | 1  | 0.93  | 1  | 4.63 | 1  | 1.94  |  | 66827  |
| Tetratricopeptide repeat protein 11 (TPR repeat protein 11) (Fis1 homolog)              | Q9CQ92 | TTC11_MOUSE  | 2  | 1.51   | 3  | 1.07  | 3  | 1.22 | 3  | 0.90  |  | 66437  |
| Tetratricopeptide repeat protein 7A (TPR repeat protein 7)                              | Q8BGB2 | TTC7A_MOUSE  | 1  | 1.04   | 2  | 1.39  |    |      |    |       |  | 225049 |
| Tetratricopeptide repeat protein KIAA0103                                               | Q9CRD2 | T103_MOUSE   | 3  | 1.50   |    |       |    |      |    |       |  | 66736  |
| Tex264 protein                                                                          | Q99LS5 | Q99LS5       | 1  | 1.01   | 1  | 1.76  | 1  | 1.17 | 3  | 1.13  |  |        |
| TFIIH basal transcription factor complex helicase subunit (EC 3.6.1.-) (DNA-repair pro  | O08811 | ERCC2_MOUSE  |    |        |    |       |    |      | 1  | 4.03  |  | 13871  |
| TGF beta-inducible nuclear protein 1 (L-name related LNR42)                             | Q9CR47 | TIP1_MOUSE   |    |        | 1  | 1.42  |    |      | 2  | 2.67  |  | 59050  |
| Thiamin pyrophosphokinase 1 (EC 2.7.6.2) (Thiamine pyrophosphokinase 1) (mTPK1          | Q9R0M5 | TPK1_MOUSE   |    |        | 1  | 1.77  |    |      |    |       |  | 29807  |
| Thioredoxin (ATL-derived factor) (ADF)                                                  | P10639 | THIO_MOUSE   | 26 | 2.54   | 25 | 1.75  | 13 | 1.63 | 20 | 1.80  |  | 22166  |
| Thioredoxin domain containing protein 1 precursor                                       | Q8VBT0 | TXNDC_MOUSE  | 3  | 1.32   | 6  | 1.31  | 4  | 0.99 | 8  | 0.96  |  | 72736  |
| Thioredoxin domain containing protein 5 precursor (Thioredoxin-like protein p46) (Enc   | Q91W90 | TXNDS5_MOUSE | 66 | 1.26   | 82 | 1.48  | 35 | 1.24 | 51 | 1.17  |  | 105245 |
| Thioredoxin domain containing protein 9 (ATP binding protein associated with cell diffi | Q9CQ79 | TXND9_MOUSE  | 1  | 6.23   | 1  | 5.60  | 1  | 1.94 | 1  | 4.10  |  | 98258  |
| Thioredoxin, mitochondrial precursor (Mt-TRX) (Thioredoxin 2)                           | P97493 | THIOM_MOUSE  | 2  | 9.48   | 4  | 9.66  | 6  | 1.48 | 5  | 1.08  |  | 56551  |
| Thioredoxin-dependent peroxide reductase, mitochondrial precursor (EC 1.11.1.15) (F     | P20108 | PRDX3_MOUSE  |    |        | 1  | 0.97  |    |      |    |       |  | 11757  |
| Thioredoxin-like protein 1 (32 kDa thioredoxin-related protein)                         | Q8CDN6 | TXNL1_MOUSE  |    |        | 1  | 3.96  | 1  | 0.74 | 3  | 1.33  |  |        |
| Thioredoxin-like protein 2 (PKC-interacting cousin of thioredoxin) (PKC-theta-interacti | Q9CQM9 | TXNL2_MOUSE  | 4  | 1.34   | 5  | 1.13  | 1  | 0.34 | 4  | 1.68  |  | 30926  |
| THO complex subunit 3 (Tho3)                                                            | Q8VE80 | THOC3_MOUSE  | 2  | 1.93   | 1  | 0.93  |    |      | 1  | 0.65  |  | 73666  |
| Three prime repair exonuclease 1 (EC 3.1.11.2) (3'-5' exonuclease TREX1)                | Q91XB0 | TREX1_MOUSE  |    |        | 1  | 2.02  |    |      |    |       |  | 22040  |
| Threonyl-tRNA synthetase, cytoplasmic (EC 6.1.1.3) (Threonine--tRNA ligase) (ThrR       | Q9D0R2 | SYTC_MOUSE   | 4  | 1.66   | 6  | 1.71  | 2  | 2.03 | 3  | 2.55  |  |        |
| Thrombomodulin precursor (Fetomodulin) (TM)                                             | P15306 | TRBM_MOUSE   |    |        | 5  | 2.68  | 3  | 1.78 | 13 | 1.48  |  | 21824  |
| Thrombospondin repeat protein 1                                                         | Q80T21 | Q80T21       |    |        |    |       | 2  | 0.81 |    |       |  |        |
| Thrombospondin-2 precursor                                                              | Q03350 | TSP2_MOUSE   | 1  | 1.74   | 3  | 8.44  | 1  | 1.55 | 2  | 3.50  |  | 21826  |



|                                                                                             |        |             |    |      |    |      |    |       |    |       |        |
|---------------------------------------------------------------------------------------------|--------|-------------|----|------|----|------|----|-------|----|-------|--------|
| THUMP domain containing protein 1                                                           | Q99J36 | THUM1_MOUSE | 2  | 1.61 |    |      | 1  | 3.36  | 1  | 1.07  |        |
| Thy-1 membrane glycoprotein precursor (Thy-1 antigen) (CDw90) (CD90 antigen)                | P01831 | THY1_MOUSE  | 6  | 1.20 | 10 | 1.95 |    |       |    |       | 21838  |
| Thymidine kinase, cytosolic (EC 2.7.1.21)                                                   | P04184 | KITH_MOUSE  |    |      | 2  | 0.99 |    |       | 1  | 3.39  | 21877  |
| Tight junction protein ZO-1 (Zonula occludens 1 protein) (Zona occludens 1 protein) (       | P39447 | ZO1_MOUSE   |    |      | 1  | 1.44 |    |       |    |       | 21872  |
| Timeless homolog (mTim)                                                                     | Q9R1X4 | TIM_MOUSE   |    |      | 1  | 4.50 |    |       |    |       |        |
| Tissue factor precursor (TF) (Coagulation factor III)                                       | P20352 | TF_MOUSE    | 4  | 1.68 | 4  | 1.87 | 4  | 1.94  | 3  | 1.20  | 14066  |
| T-lymphokine-activated killer cell-originated protein kinase (EC 2.7.1.37) (T-LAK cell-c    | Q9JJ78 | TOPK_MOUSE  |    |      |    |      |    |       | 1  | 2.33  |        |
| Tmc3 protein                                                                                | Q7TQ69 | Q7TQ69      |    |      |    |      |    |       | 1  | 0.10  |        |
| TNF receptor associated factor 2                                                            | P39429 | TRAF2_MOUSE |    |      | 3  | 1.59 | 1  | 1.23  | 2  | 0.56  | 22030  |
| TNF receptor associated factor 3 (CD40 receptor associated factor 1) (CRAF1) (TRAF          | Q60803 | TRAF3_MOUSE |    |      |    |      |    |       | 1  | 6.66  | 22031  |
| TNF receptor associated factor 5                                                            | P70191 | TRAF5_MOUSE |    |      |    |      |    |       | 2  | 1.48  | 22033  |
| Toll-like receptor 13                                                                       | Q6R5N8 | Q6R5N8      |    |      | 2  | 0.04 |    |       | 1  | 0.01  |        |
| Toll-like receptor 2 precursor                                                              | Q9QUN7 | TLR2_MOUSE  |    |      | 1  | 0.94 |    |       |    |       | 24088  |
| Trafficking protein particle complex subunit 4 (Synbindin) (TRS23 homolog)                  | Q9ES56 | TPPC4_MOUSE | 2  | 1.00 | 2  | 0.75 | 2  | 0.36  | 2  | 1.06  | 60409  |
| Trafficking protein particle complex subunit 6B                                             | Q9D289 | TPC6B_MOUSE | 1  | 1.36 | 2  | 1.36 | 4  | 1.59  | 3  | 1.19  | 78232  |
| Transaldolase (EC 2.2.1.2)                                                                  | Q93092 | TALDO_MOUSE | 8  | 1.23 | 6  | 0.93 | 1  | 1.03  | 2  | 1.57  | 21351  |
| Transcription elongation factor A protein 1 (Transcription elongation factor S-II protein   | P10711 | TCEA1_MOUSE | 4  | 8.18 | 4  | 0.93 |    |       | 2  | 1.07  | 21399  |
| Transcription elongation factor B polypeptide 1 (RNA polymerase II transcription facto      | P83940 | ELOC_MOUSE  | 2  | 0.71 | 1  | 0.85 | 1  | 1.23  |    |       | 67923  |
| Transcription elongation factor B polypeptide 2 (RNA polymerase II transcription facto      | P62869 | ELOB_MOUSE  | 5  | 1.45 | 4  | 0.99 | 3  | 1.69  | 3  | 1.31  | 67673  |
| Transcription factor BTEB4 (Basic transcription element binding-protein 4) (BTE-bindii      | P58334 | BTEB4_MOUSE |    |      | 1  | 2.08 |    |       |    |       | 118445 |
| Transcription factor IIIA (Fragment)                                                        | Q8VHT7 | Q8VHT7      |    |      |    |      |    |       | 1  | 5.31  |        |
| Transcription factor p65 (Nuclear factor NF-kappa-B p65 subunit)                            | Q04207 | TF65_MOUSE  | 6  | 1.73 | 4  | 0.74 | 2  | 1.23  | 5  | 0.97  | 19697  |
| Transcription initiation factor IIB (General transcription factor TFIIIB) (RNA polymerase   | P62915 | TF2B_MOUSE  |    |      | 1  | 0.91 |    |       |    |       | 229906 |
| Transcription initiation factor IIE, alpha subunit (TFIIE-alpha) (General transcription fa  | Q9D0D5 | T2EA_MOUSE  |    |      |    |      |    |       | 2  | 2.60  | 74197  |
| Transcription initiation factor TFIID subunit 5 (Transcription initiation factor TFIID 100  | Q8C092 | TAF5_MOUSE  |    |      |    |      |    |       | 1  | 1.72  | 226182 |
| Transcription initiation factor TFIID subunit 6 (Transcription initiation factor TFIID 70 k | Q62311 | TAF6_MOUSE  |    |      |    |      | 1  | 11.95 |    |       | 21343  |
| Transcription intermediary factor 1-alpha (TIF1-alpha) (Tripartite motif protein 24)        | Q64127 | TIF1A_MOUSE | 1  | 0.32 |    |      |    |       |    |       | 21848  |
| Transcription intermediary factor 1-beta (TIF1-beta) (Tripartite motif protein 28) (KRAE    | Q62318 | TIF1B_MOUSE | 6  | 1.44 | 11 | 3.62 | 4  | 2.61  | 16 | 1.23  | 21849  |
| Transcription intermediary factor 1-gamma (TIF1-gamma) (Tripartite motif protein 33)        | Q99PP7 | TIF1G_MOUSE |    |      | 1  | 0.58 |    |       |    |       | 94093  |
| Transcription termination factor, RNA polymerase II                                         | Q5NC05 | Q5NC05      |    |      |    |      |    |       | 1  | 1.21  |        |
| Transcriptional activator protein PUR-alpha (Purine-rich single-stranded DNA-binding        | P42669 | PUR_MOUSE   | 1  | 2.25 |    |      |    |       |    |       | 19290  |
| Transcriptional regulator ATRX (X-linked nuclear protein) (Heterochromatin protein 2)       | Q61687 | ATRX_MOUSE  |    |      | 1  | 3.49 |    |       |    |       | 22589  |
| Transcriptional repressor CTCF (CCCTC-binding factor) (CTCFCL paralog) (11-zinc fin         | Q61164 | CTCF_MOUSE  |    |      | 6  | 4.10 | 2  | 13.81 | 5  | 1.41  | 13018  |
| Transcriptional repressor p66 beta (p66/p68)                                                | Q8VHR5 | P66B_MOUSE  | 1  | 1.83 | 1  | 1.87 |    |       | 1  | 3.08  | 229542 |
| Transferrin receptor protein 1 (TfR1) (TR) (TfR) (Tfrr)                                     | Q62351 | TFR1_MOUSE  |    |      | 1  | 0.65 |    |       |    |       | 22042  |
| Transformation/transcription domain-associated protein (Tra1 homolog)                       | Q80YV3 | TRRAP_MOUSE | 2  | 0.61 |    |      |    |       | 1  | 0.24  | 100683 |
| Transformer-2 protein homolog (TRA-2 alpha)                                                 | Q6PFR5 | TRA2A_MOUSE |    |      | 1  | 3.22 |    |       |    |       | 101214 |
| Transforming acidic coiled-coil containing protein 1                                        | Q6Y685 | TACC1_MOUSE | 3  | 1.00 | 4  | 0.95 | 1  | 0.90  | 4  | 1.23  |        |
| Transforming protein RhoA                                                                   | Q9QUI0 | RHOA_MOUSE  | 3  | 1.71 |    |      |    |       |    |       | 11848  |
| Transgelin (Smooth muscle protein 22-alpha) (SM22-alpha) (Actin-associated protein          | P37804 | TAGL_MOUSE  | 4  | 1.98 | 6  | 1.54 | 2  | 1.94  | 4  | 1.33  | 21345  |
| Transient receptor potential cation channel subfamily A member 1 (Ankyrin-like with tr      | Q8BLA8 | TRPA1_MOUSE |    |      | 1  | 0.02 |    |       | 1  | 0.06  | 277328 |
| Transketolase (EC 2.2.1.1) (TK) (P68)                                                       | P40142 | TKT_MOUSE   | 25 | 1.78 | 27 | 1.46 | 10 | 1.35  | 13 | 1.15  | 21881  |
| Translation initiation factor eIF-2B alpha subunit (eIF-2B GDP-GTP exchange factor)         | Q99LC8 | EI2BA_MOUSE | 1  | 1.11 | 2  | 0.96 |    |       |    |       | 209354 |
| Translation initiation factor eIF-2B beta subunit (eIF-2B GDP-GTP exchange factor)          | Q99LD9 | EI2BB_MOUSE | 1  | 5.69 | 1  | 0.53 | 1  | 1.06  | 2  | 2.43  | 217715 |
| Translation initiation factor eIF-2B delta subunit (eIF-2B GDP-GTP exchange factor)         | Q61749 | EI2BD_MOUSE |    |      | 2  | 1.35 |    |       | 6  | 0.99  | 13667  |
| Translin associated protein X (Translin-associated factor X) (Mus musculus adult male       | Q9QZE7 | Q9QZE7      | 1  | 0.68 |    |      |    |       |    |       |        |
| Transmembrane 4 superfamily member 7                                                        | Q9DCK3 | T4S7_MOUSE  |    |      |    |      |    |       | 2  | 0.23  | 64540  |
| Transmembrane 9 superfamily protein member 1 precursor                                      | Q9DBU0 | TM9S1_MOUSE |    |      | 1  | 0.79 | 3  | 0.66  | 1  | 0.81  | 74140  |
| Transmembrane 9 superfamily protein member 2 precursor                                      | P58021 | TM9S2_MOUSE | 7  | 2.27 | 8  | 2.52 | 4  | 1.67  | 2  | 1.31  | 68059  |
| Transmembrane 9 superfamily protein member 3 precursor                                      | Q9ET30 | TM9S3_MOUSE | 3  | 1.34 | 3  | 1.22 | 2  | 1.37  | 1  | 1.37  | 107358 |
| Transmembrane emp24 domain containing protein 6 precursor                                   | Q9CQG0 | TMED6_MOUSE |    |      |    |      |    |       | 1  | 1.36  |        |
| Transmembrane GTPase MFN1 (EC 3.6.5.-) (Mitofusin 1)                                        | Q811U4 | MFN1_MOUSE  | 3  | 6.39 | 2  | 2.38 | 1  | 0.18  |    |       | 67414  |
| Transmembrane GTPase MFN2 (EC 3.6.5.-) (Mitofusin 2) (Hypertension related prote            | Q80U63 | MFN2_MOUSE  | 1  | 1.16 |    |      |    |       |    |       | 170731 |
| Transmembrane protein 15                                                                    | Q8R2Y3 | Q8R2Y3      |    |      |    |      |    |       | 1  | 0.35  |        |
| Transmembrane protein 16F                                                                   | Q6P9J9 | Q6P9J9      | 1  | 1.88 | 2  | 1.20 |    |       | 1  | 1.34  |        |
| Transmembrane protein 33 (DB83 protein)                                                     | Q9CR67 | TMM33_MOUSE | 6  | 1.21 | 7  | 2.11 |    |       | 4  | 0.97  | 67878  |
| Transmembrane protein PFT27 (TPA regulated locus protein)                                   | P52875 | PF27_MOUSE  |    |      |    |      |    |       | 1  | 32.40 | 21982  |
| Transportin 1 (Importin beta-2) (Karyopherin beta-2)                                        | Q8BFY9 | TNPO1_MOUSE | 9  | 1.61 | 7  | 1.20 | 7  | 1.90  | 10 | 3.40  | 238799 |
| Transportin 2 (Karyopherin beta-2b)                                                         | Q99LG2 | TNPO2_MOUSE | 8  | 1.22 | 2  | 1.26 | 2  | 2.28  |    |       | 212999 |
| Transportin 3                                                                               | Q6P2B1 | TNPO3_MOUSE | 2  | 2.41 | 5  | 1.38 | 1  | 1.64  | 6  | 1.97  | 320938 |
| Trifunctional enzyme beta subunit, mitochondrial precursor (TP-beta) [Includes: 3-ketr      | Q99JY0 | ECHB_MOUSE  | 1  | 1.37 | 5  | 1.32 | 5  | 1.07  | 8  | 0.86  | 231086 |

|                                                                                                       |             |    |      |    |       |   |       |   |      |        |
|-------------------------------------------------------------------------------------------------------|-------------|----|------|----|-------|---|-------|---|------|--------|
| Trifunctional purine biosynthetic protein adenosine-3 [Includes: Phosphoribosylamine- Q64737          | PUR2_MOUSE  | 10 | 3.68 | 9  | 4.04  |   |       | 2 | 1.32 | 14450  |
| Trim59 protein (RING finger 1)                                                                        | Q922Y2      | 1  | 1.05 | 1  | 1.08  | 1 | 0.78  |   |      |        |
| Trimethyllysine dioxygenase, mitochondrial precursor (EC 1.14.11.8) (Epsilon-trimeth) Q91ZE0          | TMLH_MOUSE  |    |      | 1  | 1.74  | 2 | 0.79  | 5 | 1.23 | 192289 |
| Triosephosphate isomerase (EC 5.3.1.1) (TIM) (Triose-phosphate isomerase)                             | P17751      | 15 | 2.46 | 17 | 1.20  | 6 | 1.75  | 7 | 1.42 | 21991  |
| Tripartite motif protein 16                                                                           | Q5SUS2      |    |      |    |       |   |       | 1 | 1.03 |        |
| Tripartite motif protein 25 (Zinc finger protein 147) (Estrogen responsive finger protein Q61510      | TRI25_MOUSE | 2  | 1.55 |    |       | 3 | 2.13  | 3 | 1.45 | 217069 |
| Tripartite motif protein 32 (EC 6.3.2.-)                                                              | Q8CH72      |    |      |    |       |   |       | 2 | 0.83 | 69807  |
| Tripartite motif protein 47                                                                           | Q8C0E3      |    |      |    |       |   |       | 1 | 2.36 | 217333 |
| Tripartite motif protein 56                                                                           | Q80V11      | 1  | 0.67 |    |       |   |       | 2 | 1.20 | 384309 |
| Tripeptidyl-peptidase I precursor (EC 3.4.14.9) (TPP-I) (Tripeptidyl aminopeptidase) (I O89023        | TPP1_MOUSE  |    |      | 1  | 2.17  |   |       | 2 | 1.00 | 12751  |
| Tripeptidyl-peptidase II (EC 3.4.14.10) (TPP-II) (Tripeptidyl aminopeptidase)                         | Q64514      | 2  | 1.03 |    |       | 1 | 2.79  |   |      | 22019  |
| tRNA (5-methylaminomethyl-2-thiouridylate)-methyltransferase 1 (EC 2.1.1.61)                          | Q9DAT5      |    |      |    |       | 2 | 0.80  |   |      | 72026  |
| tRNA-splicing endonuclease subunit Sen34 (EC 3.1.27.9) (tRNA-intron endonuclease Q8BMZ5               | SEN34_MOUSE |    |      |    |       | 1 | 1.24  |   |      | 66078  |
| tRNA-splicing endonuclease subunit Sen54 (tRNA-intron endonuclease Sen54)                             | Q8C2A2      | 1  | 0.02 |    |       |   |       |   |      | 76265  |
| Tropomyosin 3, gamma                                                                                  | Q8K0Z5      | 7  | 1.51 | 4  | 1.74  | 1 | 1.08  | 4 | 1.19 |        |
| Tropomyosin alpha 4 chain (Tropomyosin 4)                                                             | Q6IRU2      | 2  | 1.31 | 1  | 1.22  |   |       |   |      | 326618 |
| Trpc4-associated protein (Trp4-associated protein) (Short transient receptor potential Q9JLV2         | TP4AP_MOUSE |    |      |    |       |   |       | 2 | 0.75 | 56407  |
| Tryptophan 5-hydroxylase 1 (EC 1.14.16.4) (Tryptophan 5-monoxygenase 1)                               | P17532      |    |      |    |       | 1 | 19.21 |   |      | 21990  |
| Tryptophanyl-tRNA synthetase (EC 6.1.1.2) (Tryptophan--tRNA ligase) (TrpRS)                           | P32921      | 4  | 2.40 | 1  | 0.96  |   |       | 3 | 2.12 | 22375  |
| Tubulin beta-6 chain                                                                                  | Q922F4      |    |      |    |       |   |       | 1 | 5.65 |        |
| Tubulin tyrosine ligase-like protein 1                                                                | Q91V51      |    |      | 1  | 1.22  |   |       |   |      | 319953 |
| Tubulin, gamma complex associated protein 3                                                           | Q6PDQ9      |    |      | 2  | 1.30  | 2 | 1.19  | 3 | 1.24 |        |
| Tubulin-specific chaperone c                                                                          | Q8VCN9      | 4  | 2.39 | 1  | 3.45  | 2 | 1.81  | 4 | 1.43 |        |
| Tubulin--tyrosine ligase (EC 6.3.2.25) (TTL)                                                          | P38585      | 1  | 2.35 | 1  | 1.96  |   |       | 2 | 1.33 | 69737  |
| Tudor domain containing protein 7 (Tudor repeat associator with PCTAIRE 2) (Trap)                     | Q8K1H1      | 1  | 2.41 | 3  | 2.31  | 1 | 1.78  | 1 | 1.64 | 100121 |
| Tumor differentially expressed protein 1 (Membrane protein TMS-1) (Axotomy inducer Q9QZ19             | TDE1_MOUSE  | 2  | 1.17 | 4  | 1.14  |   |       |   |      | 26943  |
| Tumor endothelial marker 1 precursor (CD248 antigen, endosialin)                                      | Q91V98      |    |      | 2  | 5.33  |   |       | 1 | 1.18 |        |
| Tumor necrosis factor ligand superfamily member 13B (B cell-activating factor) (BAFF Q9WU72           | TN13B_MOUSE | 1  | 3.16 |    |       |   |       |   |      | 24099  |
| Tumor necrosis factor ligand superfamily member 5 (CD40 ligand) (TNF-rel: P27548                      | TNLF5_MOUSE |    |      | 2  | 9.35  |   |       |   |      | 21947  |
| Tumor necrosis factor receptor superfamily member 10B precursor (Death receptor 5) Q9QZM4             | TR10B_MOUSE |    |      | 1  | 0.56  |   |       | 2 | 0.76 | 21933  |
| Tumor necrosis factor receptor superfamily member 3 precursor (Lymphotoxin-beta re P50284             | TNR3_MOUSE  |    |      | 2  | 2.12  |   |       | 3 | 1.04 | 17000  |
| Tumor necrosis factor receptor superfamily member 6 precursor (FASL receptor) (Apc P25446             | TNR6_MOUSE  |    |      |    |       |   |       | 1 | 1.22 | 14102  |
| Tumor necrosis factor receptor superfamily member Fn14 precursor (Fibroblast growth Q9CR75            | FN14_MOUSE  |    |      |    |       |   |       | 2 | 3.68 | 27279  |
| Tumor suppressing subtransferable candidate 1                                                         | Q8K0G5      | 1  | 0.90 |    |       |   |       |   |      |        |
| Tumor-related protein (Isocitrate dehydrogenase 3, beta subunit)                                      | Q91VA7      | 4  | 2.10 | 8  | 2.45  | 1 | 0.76  | 7 | 1.19 |        |
| Type II hair keratin (Fragment)                                                                       | Q9ERE2      |    |      |    |       |   |       | 2 | 0.36 |        |
| Type V P-type ATPase isoform 3                                                                        | Q5XF89      |    |      |    |       | 1 | 1.16  |   |      |        |
| Type VI collagen alpha 3 subunit                                                                      | Q88493      | 5  | 1.15 | 3  | 1.62  | 5 | 2.01  | 4 | 1.21 |        |
| Type-II keratin Kb35                                                                                  | Q6IME9      |    |      |    |       |   |       | 1 | 0.06 |        |
| Tyrosine-protein kinase JAK1 (EC 2.7.1.112) (Janus kinase 1) (JAK-1)                                  | P52332      | 1  | 1.15 | 2  | 1.48  | 3 | 0.84  | 3 | 1.04 | 16451  |
| Tyrosine-protein kinase receptor Tie-1 precursor (EC 2.7.1.112)                                       | Q06806      |    |      | 1  | 11.27 |   |       |   |      | 21846  |
| Tyrosine-protein kinase SYK (EC 2.7.1.112) (Spleen tyrosine kinase)                                   | P48025      | 1  | 4.78 | 1  | 1.88  |   |       | 2 | 1.45 | 20963  |
| Tyrosine-protein phosphatase, non-receptor type 1 (EC 3.1.3.48) (Protein-tyrosine phosphatase P35821  | PTN1_MOUSE  |    |      |    |       |   |       | 1 | 1.44 | 19246  |
| Tyrosine-protein phosphatase, non-receptor type 13 (EC 3.1.3.48) (Protein tyrosine phosphatase P64512 | PTN13_MOUSE | 1  | 1.87 | 2  | 0.97  |   |       | 2 | 0.73 | 19249  |
| Tyrosine-protein phosphatase, non-receptor type 2 (EC 3.1.3.48) (Protein-tyrosine phosphatase Q06180  | PTN2_MOUSE  | 1  | 1.48 | 1  | 1.54  | 2 | 1.51  | 2 | 1.45 | 19255  |
| Tyrosine-protein phosphatase, non-receptor type 21 (EC 3.1.3.48) (Protein-tyrosine phosphatase Q62136 | PTN21_MOUSE |    |      |    |       |   |       | 1 | 1.25 | 24000  |
| Tyrosyl-tRNA synthetase, cytoplasmic (EC 6.1.1.1) (Tyrosyl--tRNA ligase) (TyrRS)                      | Q91WQ3      | 4  | 1.05 | 6  | 0.74  | 2 | 1.47  | 3 | 1.50 | 107271 |
| U1 small nuclear ribonucleoprotein C (U1 snRNP protein C) (U1-C)                                      | Q62241      |    |      | 4  | 1.72  | 1 | 1.05  | 2 | 1.28 | 20630  |
| U2 small nuclear ribonucleoprotein auxiliary factor 35 kDa subunit related-protein 1 (U Q64707        | U2AFL_MOUSE |    |      |    |       |   |       | 2 | 0.77 | 22183  |
| U4/U6 small nuclear ribonucleoprotein Prp3 (Pre-mRNA splicing factor 3)                               | Q922U1      | 1  | 1.41 | 1  | 1.96  | 2 | 1.27  | 2 | 0.49 | 70767  |
| U5 snRNP-associated 102 kDa protein (U5-102 kDa protein)                                              | Q91YR7      | 1  | 1.10 |    |       |   |       |   |      | 68879  |
| U6 snRNA-associated Sm-like protein LSM7                                                              | Q9CQ08      | 1  | 0.53 | 2  | 1.40  | 1 | 2.30  |   |      | 66094  |
| Ubiquinol-cytochrome c reductase complex 11 kDa protein, mitochondrial precursor (E P99028            | UCRH_MOUSE  | 2  | 0.87 | 1  | 0.51  |   |       |   |      | 66576  |
| Ubiquinol-cytochrome-c reductase complex core protein 2, mitochondrial precursor (E Q9DB77            | UQCR2_MOUSE | 5  | 1.36 | 14 | 1.21  | 4 | 1.48  | 2 | 1.74 | 67003  |
| Ubiquinol-cytochrome-c reductase complex core protein 1, mitochondrial precursor (E Q9CZ13            | UQCR1_MOUSE | 8  | 1.01 | 7  | 0.87  | 1 | 1.52  |   |      | 22273  |
| Ubiquitin carboxyl-terminal hydrolase 10 (EC 3.1.2.15) (Ubiquitin thiolesterase 10) (Utl P52479       | UBP10_MOUSE |    |      | 1  | 1.07  | 2 | 0.93  | 2 | 1.40 | 22224  |
| Ubiquitin carboxyl-terminal hydrolase 25 (EC 3.1.2.15) (Ubiquitin thiolesterase 25) (Utl P57080       | UBP25_MOUSE |    |      | 1  | 3.92  | 1 | 4.93  |   |      | 30940  |
| Ubiquitin carboxyl-terminal hydrolase 40 (EC 3.1.2.15) (Ubiquitin thiolesterase 40) (Utl Q8BWR4       | UBP40_MOUSE | 1  | 4.13 | 1  | 1.30  |   |       |   |      | 227334 |
| Ubiquitin carboxyl-terminal hydrolase 5 (EC 3.1.2.15) (Ubiquitin thiolesterase 5) (Ubiq P56399        | UBP5_MOUSE  | 2  | 2.25 | 2  | 1.05  |   |       |   |      | 22225  |
| Ubiquitin carboxyl-terminal hydrolase 8 (EC 3.1.2.15) (Ubiquitin thiolesterase 8) (Ubiq Q80U87        | UBP8_MOUSE  |    |      | 1  | 1.56  | 1 | 0.87  | 1 | 1.15 | 84092  |
| Ubiquitin carboxyl-terminal hydrolase isozyme L5 (EC 3.4.19.12) (UCH-L5) (Ubiquitin Q9WUP7            | UCHL5_MOUSE |    |      |    |       |   |       | 1 | 1.12 | 56207  |

|                                                                                       |         |             |    |       |    |      |    |      |               |
|---------------------------------------------------------------------------------------|---------|-------------|----|-------|----|------|----|------|---------------|
| Ubiquitin conjugating enzyme 7 interacting protein 3 (UbcM4-interacting protein 28)   | Q9WUB0  | UB7I3_MOUSE |    |       | 1  | 0.36 | 1  | 2.41 | 24105         |
| Ubiquitin ligase LNX (EC 6.3.2.-) (Numb-binding protein 1) (Ligand of Numb-binding p  | O70263  | LNX1_MOUSE  |    |       | 1  | 0.01 | 2  | 0.05 | 16924         |
| Ubiquitin ligase protein COP1 (EC 6.3.2.-) (Constitutive photomorphogenesis protein   | Q9R1A8  | COP1H_MOUSE | 1  | 0.67  |    |      | 1  | 0.85 | 26374         |
| Ubiquitin ligase protein LRSAM1 (EC 6.3.2.-) (Leucine rich repeat and sterile alpha m | Q80Z16  | LRSM1_MOUSE | 1  | 4.42  | 1  | 1.45 |    |      |               |
| Ubiquitin specific protease 16                                                        | Q99LG0  | Q99LG0      | 2  | 1.10  | 1  | 2.71 |    |      |               |
| Ubiquitin specific protease homolog 49 (TRF-proximal protein homolog)                 | Q9R0X0  | USP49_MOUSE |    |       | 1  | 1.14 |    | 2    | 1.56 56771    |
| Ubiquitin thiolesterase protein OTUB1 (EC 3.4.-.-) (Otubain 1) (OTU domain-containin  | Q7TQ13  | OTUB1_MOUSE | 11 | 1.79  | 9  | 1.40 | 10 | 1.86 | 3 2.16 107260 |
| Ubiquitin-activating enzyme E1 1                                                      | Q02053  | UBE1_MOUSE  | 13 | 1.42  | 7  | 1.24 | 5  | 1.31 | 7 1.28 22201  |
| Ubiquitin-activating enzyme E1c (Nedd8-activating enzyme E1c) (Ubiquitin-activating   | Q8C878  | UBE1C_MOUSE | 4  | 2.08  |    |      |    |      | 22200         |
| Ubiquitin-conjugating enzyme                                                          | O88738  | O88738      | 9  | 2.00  | 8  | 0.84 | 2  | 1.09 | 7 1.39        |
| Ubiquitin-conjugating enzyme E2 G2 (EC 6.3.2.19) (Ubiquitin-protein ligase G2) (Ubiq  | P60605  | UB2G2_MOUSE | 1  | 1.29  |    |      |    |      | 22213         |
| Ubiquitin-conjugating enzyme E2 J1 (EC 6.3.2.19) (Non-canonical ubiquitin conjugatir  | Q9JJZ4  | UB2J1_MOUSE |    |       | 1  | 1.43 | 1  | 1.34 | 56228         |
| Ubiquitin-conjugating enzyme E2 L3 (EC 6.3.2.19) (Ubiquitin-protein ligase L3) (Ubiq  | P68037  | UB2L3_MOUSE | 6  | 2.53  | 6  | 1.94 | 4  | 1.86 | 4 1.61 22195  |
| Ubiquitin-conjugating enzyme E2 M (EC 6.3.2.19) (Ubiquitin-protein ligase M) (Ubiquit | P61082  | UBE2M_MOUSE | 3  | 1.57  | 2  | 1.24 |    |      | 22192         |
| Ubiquitin-conjugating enzyme E2-25 kDa (EC 6.3.2.19) (Ubiquitin-protein ligase) (Ubi  | P61087  | UBC1_MOUSE  | 3  | 0.85  | 3  | 0.92 |    |      | 1 0.96 53323  |
| Ubiquitin-like 1 activating enzyme E1A (SUMO-1 activating enzyme subunit 1)           | Q9R1T2  | ULE1A_MOUSE | 2  | 4.38  | 6  | 2.05 | 4  | 1.70 | 4 1.66 56459  |
| Ubiquitin-like 2 activating enzyme E1B (SUMO-1 activating enzyme subunit 2) (Anthr    | Q9Z1F9  | ULE1B_MOUSE | 12 | 1.64  | 13 | 1.57 | 2  | 1.18 | 9 1.43 50995  |
| Ubiquitin-like protein 5                                                              | Q9EPV8  | UBL5_MOUSE  | 1  | 1.79  |    |      |    |      | 66177         |
| Ubiquitin-like protein SMT3C precursor (Ubiquitin-homology domain protein PIC1)       | P63166  | SMT3C_MOUSE |    |       | 1  | 0.91 |    |      | 22218         |
| Ubiquitin-protein ligase E3A (EC 6.3.2.-) (Oncogenic protein-associated protein E6-AF | O08759  | UBE3A_MOUSE |    |       |    |      | 1  | 0.58 | 22215         |
| Ubiquitin-protein ligase E3-alpha                                                     | O70481  | O70481      | 1  | 13.96 | 3  | 0.99 |    |      | 1 1.39        |
| UBX domain-containing protein 1                                                       | Q99PL6  | UBXD1_MOUSE | 2  | 1.58  | 1  | 1.21 | 1  | 1.02 | 2 1.08 66530  |
| UBX domain-containing protein 2                                                       | Q8VCH8  | UBXD2_MOUSE | 1  | 1.24  | 2  | 1.46 | 3  | 0.88 | 6 1.10 67812  |
| UDP-Gal:betaGlcNAc beta 1,3-galactosyltransferase-III (UDP-Gal:betaGlcNAc beta 1,3    | O54906  | O54906      |    |       |    |      |    |      | 1 0.34        |
| UDP-galactose translocator (UDP-galactose transporter) (UGT) (UDP-Gal-Tr) (Solute     | Q9R0M8  | S35A2_MOUSE |    |       | 2  | 1.80 |    |      | 1 0.92 22232  |
| UDP-galactose transporter related isozyme 1 (UDP-galactose translocator 2) (Ugalt2    | P97858  | P97858      | 2  | 1.98  | 1  | 2.46 |    |      |               |
| UDP-glucose 4-epimerase (EC 5.1.3.2) (Galactowaldenase) (UDP-galactose 4-epime        | Q8R059  | GALE_MOUSE  | 1  | 5.78  |    |      | 1  | 1.47 | 74246         |
| UDP-glucose 6-dehydrogenase (EC 1.1.1.22) (UDP-Glc dehydrogenase) (UDP-GlcD           | O70475  | UGDH_MOUSE  | 12 | 1.28  | 9  | 1.19 | 5  | 2.01 | 3 1.88 22235  |
| UDP-glucose ceramide glucosyltransferase-like 1                                       | Q6NV70  | Q6NV70      | 10 | 4.05  | 5  | 1.38 | 5  | 1.08 | 4 0.83        |
| UDP-N-acteylglucosamine pyrophosphorylase 1 homolog                                   | Q91YN5  | Q91YN5      | 1  | 2.08  | 1  | 1.25 | 2  | 1.84 | 1 1.59        |
| UGA suppressor tRNA-associated protein                                                | Q6P6M7  | UGTAP_MOUSE |    |       |    |      |    |      | 1 0.85        |
| Ugt2a1 protein                                                                        | Q80X89  | Q80X89      |    |       | 1  | 4.27 |    |      |               |
| Uncharacterized hematopoietic stem/progenitor cells protein MDS029 homolog            | Q91WS0  | MDS29_MOUSE | 2  | 1.68  | 4  | 1.19 |    |      | 1 0.84 52637  |
| UPF0082 protein                                                                       | Q8K0Z7  | U082_MOUSE  | 1  | 0.85  | 3  | 1.13 |    |      | 70207         |
| UPF0120 protein DKFzP564C186 homolog                                                  | Q9VWV70 | YU20_MOUSE  | 1  | 9.29  | 1  | 5.45 | 1  | 0.50 | 57741         |
| UPF0238 protein C20orf139 homolog                                                     | Q9D975  | CT139_MOUSE |    |       | 2  | 1.76 |    |      | 76650         |
| UPF0326 protein CGI-96                                                                | Q9D291  | CG96_MOUSE  |    |       |    |      |    |      | 1 0.79 78825  |
| Uridine 5'-monophosphate synthase (UMP synthase) [Includes: Orotate phosphoribos      | P13439  | PYR5_MOUSE  | 7  | 1.95  | 2  | 1.10 |    |      | 5 1.41 22247  |
| Uridine/cytidine kinase-like 1                                                        | Q91YL3  | UCKL1_MOUSE | 1  | 1.32  | 1  | 0.05 |    |      | 68556         |
| Uroporphyrinogen decarboxylase (EC 4.1.1.37) (URO-D) (UPD)                            | P70697  | DCUP_MOUSE  |    |       | 2  | 3.09 |    |      | 2 2.21 22275  |
| Usp30 protein (Fragment)                                                              | Q8CHW7  | Q8CHW7      |    |       | 1  | 0.74 |    |      | 1 0.83        |
| UTP--glucose-1-phosphate uridylyltransferase 2 (EC 2.7.7.9) (UDP-glucose pyrophos     | Q91ZJ5  | UGPA2_MOUSE |    |       | 1  | 0.26 |    |      |               |
| UV excision repair protein RAD23 homolog B (mHR23B) (XP-C repair complementing        | P54728  | RD23B_MOUSE | 1  | 0.31  |    |      |    |      | 19359         |
| Vac14 homolog                                                                         | Q80WQ2  | Q80WQ2      | 1  | 1.85  | 1  | 0.17 |    |      | 1 2.38        |
| Vacuolar ATP synthase subunit B, brain isoform (EC 3.6.3.14) (V-ATPase B2 subunit)    | P62814  | VATB2_MOUSE | 5  | 1.73  | 1  | 0.06 |    |      | 11966         |
| Vacuolar ATP synthase subunit d (EC 3.6.3.14) (V-ATPase d subunit) (Vacuolar protc    | P51863  | VA0D_MOUSE  | 4  | 1.79  | 3  | 1.50 | 1  | 1.92 | 11972         |
| Vacuolar ATP synthase subunit G 1 (EC 3.6.3.14) (V-ATPase G subunit 1) (Vacuolar      | Q9CR51  | VATG1_MOUSE | 2  | 1.41  | 2  | 0.68 |    |      | 66290         |
| Vacuolar protein sorting 11                                                           | Q91W86  | VPS11_MOUSE | 1  | 1.55  |    |      |    |      | 71732         |
| Vacuolar protein sorting 16 (mVPS16)                                                  | Q920Q4  | VPS16_MOUSE |    |       |    |      | 1  | 2.17 | 2 0.87 80743  |
| Vacuolar protein sorting 29 (Vesicle protein sorting 29)                              | Q9QZ88  | VPS29_MOUSE | 5  | 1.74  | 6  | 1.45 | 3  | 1.59 | 9 1.11 56433  |
| Vacuolar protein sorting 33B                                                          | P59016  | VP33B_MOUSE | 1  | 1.06  |    |      |    |      | 233405        |
| Vacuolar protein sorting 35 (Vesicle protein sorting 35) (Maternal-embryonic 3)       | Q9EQH3  | VPS35_MOUSE | 5  | 1.19  | 13 | 0.96 | 2  | 2.00 | 1 0.79 65114  |
| Vacuolar proton translocating ATPase 116 kDa subunit a isoform 1 (V-ATPase 116-kI     | Q9Z1G4  | VPP1_MOUSE  | 2  | 1.93  | 1  | 1.65 |    |      | 11975         |
| Valacyclovir hydrolase precursor (EC 3.1.-.-) (VACVase) (Biphenyl hydrolase-like prot | Q8R164  | BPHL_MOUSE  | 1  | 1.31  | 1  | 1.29 |    |      | 2 0.79 68021  |
| Valyl-tRNA synthetase 2 (EC 6.1.1.9) (Valine--tRNA ligase 2) (ValRS 2)                | Q9Z1Q9  | SYV2_MOUSE  | 25 | 1.16  | 25 | 1.05 | 15 | 1.32 | 15 1.48 22321 |
| Vascular actin single-stranded DNA-binding factor 2 p44 component (Purine rich elem   | O35295  | O35295      | 4  | 1.13  | 3  | 1.45 | 4  | 1.18 | 2 0.83        |
| Vascular cell adhesion protein 1 precursor (V-CAM 1)                                  | P29533  | VCAM1_MOUSE | 18 | 1.53  | 13 | 1.36 | 7  | 1.29 | 9 2.01 22329  |
| Vascular endothelial growth factor receptor 3 precursor (EC 2.7.1.112) (VEGFR-3) (T   | P35917  | VGFR3_MOUSE |    |       |    |      |    |      | 1 0.11 14257  |
| Vascular endothelial protein tyrosine phosphatase                                     | Q8CIW2  | Q8CIW2      |    |       | 1  | 0.21 |    |      |               |
| Vascular endothelial zinc finger 1                                                    | Q9Z162  | Q9Z162      |    |       | 2  | 0.41 |    |      | 2 0.85        |
| Vav proto-oncogene (p95vav)                                                           | P27870  | VAV_MOUSE   |    |       |    |      |    |      | 1 1.18 22324  |

|                                                                                                               |        |             |    |       |    |       |   |       |    |      |  |        |
|---------------------------------------------------------------------------------------------------------------|--------|-------------|----|-------|----|-------|---|-------|----|------|--|--------|
| Veph-A protein                                                                                                | Q8K4P6 | Q8K4P6      |    |       | 1  | 0.96  |   |       |    |      |  |        |
| Vesicle docking protein                                                                                       | Q91WE7 | Q91WE7      | 2  | 1.75  | 2  | 1.03  |   |       |    |      |  |        |
| Vesicle-associated membrane protein-associated protein A (VAMP-associated protein)                            | Q9WV55 | VAPA_MOUSE  | 3  | 1.33  | 3  | 1.23  |   |       |    |      |  | 30960  |
| Vesicle-fusing ATPase (EC 3.6.4.6) (Vesicular-fusion protein NSF) (N-ethylmaleimide sensitive fusion protein) | P46460 | NSF_MOUSE   | 3  | 1.68  | 6  | 1.24  | 9 | 1.41  | 4  | 1.54 |  | 18195  |
| Vigilin (High density lipoprotein-binding protein) (HDL-binding protein)                                      | Q8VDJ3 | VIGLN_MOUSE | 8  | 1.19  | 5  | 1.35  | 5 | 1.10  | 3  | 1.13 |  | 110611 |
| Vimentin                                                                                                      | P20152 | VIME_MOUSE  | 5  | 3.65  | 5  | 68.64 | 2 | 0.27  | 1  | 3.43 |  | 22352  |
| Vinculin (Metavinculin)                                                                                       | Q64727 | VINC_MOUSE  | 10 | 1.48  | 11 | 1.16  | 4 | 1.51  | 4  | 0.73 |  | 22330  |
| VIP36-like protein precursor (Lectin, mannose-binding 2-like)                                                 | P59481 | LMA2L_MOUSE | 1  | 0.57  |    |       |   |       |    |      |  |        |
| Vitamin K-dependent gamma-carboxylase (EC 6.4.-.-) (Gamma-glutamyl carboxylase)                               | Q9QYC7 | VKGC_MOUSE  | 3  | 0.94  | 2  | 1.22  | 1 | 1.29  |    |      |  | 56316  |
| Vitamin K-dependent protein S precursor                                                                       | Q08761 | PROS_MOUSE  |    |       |    |       |   |       | 2  | 0.99 |  | 19128  |
| VKORC1-like protein 1                                                                                         | Q6TEK5 | Q6TEK5      |    |       | 1  | 1.72  |   |       |    |      |  |        |
| Voltage-dependent anion-selective channel protein 1 (VDAC-1) (mVDAC1) (mVDAC5)                                | Q60932 | VDAC1_MOUSE | 7  | 1.36  | 4  | 1.27  | 1 | 1.72  | 1  | 0.59 |  | 22333  |
| Voltage-dependent anion-selective channel protein 2 (VDAC-2) (mVDAC2) (mVDAC6)                                | Q60930 | VDAC2_MOUSE | 1  | 0.31  | 2  | 0.78  | 1 | 3.90  | 2  | 0.71 |  | 22334  |
| Voltage-dependent anion-selective channel protein 3 (VDAC-3) (mVDAC3) (Outer mit)                             | Q60931 | VDAC3_MOUSE |    |       | 1  | 0.77  |   |       |    |      |  | 22335  |
| Voltage-dependent R-type calcium channel alpha-1E subunit (Voltage-gated calcium channel)                     | Q61290 | CAC1E_MOUSE |    |       | 1  | 0.13  |   |       |    |      |  | 12290  |
| Voltage-gated potassium channel subunit Kv6.3                                                                 | Q80XM3 | Q80XM3      |    |       | 1  | 1.08  |   |       |    |      |  |        |
| Vomeroneasal receptor V1RB8 (Vomeroneasal receptor 1 A13)                                                     | Q9EQ45 | Q9EQ45      |    |       | 1  | 0.59  |   |       |    |      |  |        |
| Vomeroneasal receptor V1RH10 (OTTMUSP0000000504)                                                              | Q8R274 | Q8R274      |    |       |    |       | 1 | 0.46  |    |      |  |        |
| VPS28 protein homolog (Caspase-activated DNase inhibitor that interacts with ASK1)                            | Q9D1C8 | VPS28_MOUSE | 4  | 1.40  | 3  | 1.22  | 6 | 1.47  | 3  | 1.27 |  |        |
| WD repeat and FYVE domain containing protein 2 (WD40- and FYVE-domain containing protein)                     | Q8BUB4 | WDFY2_MOUSE |    |       | 3  | 0.86  |   |       | 3  | 1.59 |  | 268752 |
| WD repeat domain 11                                                                                           | Q8K1X1 | Q8K1X1      |    |       |    |       |   |       | 3  | 1.70 |  |        |
| WD repeat domain 21                                                                                           | Q99LF7 | Q99LF7      | 1  | 0.48  | 1  | 0.02  |   |       |    |      |  |        |
| WD repeat domain 24                                                                                           | Q8CFJ9 | Q8CFJ9      | 1  | 2.64  |    |       |   |       |    |      |  |        |
| WD repeat membrane protein                                                                                    | Q8K3R5 | Q8K3R5      | 1  | 1.20  | 1  | 1.10  |   |       |    |      |  |        |
| WD repeat protein WDR6 (WD repeat domain 6) (Mus musculus 6 days neonate skin)                                | Q99ME2 | Q99ME2      | 4  | 1.50  | 5  | 0.97  |   |       | 2  | 1.55 |  |        |
| Wdfy1 protein                                                                                                 | Q8R315 | Q8R315      | 8  | 1.34  | 8  | 1.42  | 5 | 0.89  | 6  | 1.27 |  |        |
| WD-repeat protein 12 (YTM1 homolog)                                                                           | Q9JJA4 | WDR12_MOUSE |    |       |    |       |   |       | 3  | 2.69 |  | 57750  |
| WD-repeat protein 22                                                                                          | Q80T85 | WDR22_MOUSE |    |       | 1  | 3.54  |   |       | 2  | 1.22 |  | 320808 |
| WD-repeat protein 26                                                                                          | Q8C6G8 | WDR26_MOUSE | 1  | 1.04  | 4  | 1.53  | 2 | 0.87  | 3  | 1.74 |  | 226757 |
| WD-repeat protein 35                                                                                          | Q8BND3 | WDR35_MOUSE | 1  | 1.86  |    |       |   |       |    |      |  | 74682  |
| WD-repeat protein 37                                                                                          | Q8CBE3 | WDR37_MOUSE |    |       | 1  | 1.55  |   |       | 1  | 1.48 |  | 207615 |
| WD-repeat protein 4                                                                                           | Q9EP82 | WDR4_MOUSE  | 1  | 2.42  |    |       | 1 | 1.58  | 1  | 0.95 |  | 57773  |
| WD-repeat protein 5 (BMP2-induced 3-kb gene protein) (WD-repeat protein BIG-3)                                | P61965 | WDR5_MOUSE  |    |       |    |       |   |       | 1  | 7.78 |  | 140858 |
| WD-repeat protein HUSSY-07                                                                                    | Q8VEJ4 | HUS7_MOUSE  | 1  | 1.72  | 1  | 0.66  |   |       |    |      |  | 217011 |
| Wdrx1 protein                                                                                                 | Q91VM3 | Q91VM3      |    |       | 1  | 2.68  |   |       | 2  | 1.62 |  |        |
| Williams-Beuren syndrome chromosome region 16 protein homolog                                                 | Q9CYF5 | WBS16_MOUSE | 2  | 1.28  |    |       |   |       |    |      |  | 94254  |
| Wiskott-Aldrich syndrome protein family member 1 (WASP-family protein member 1) (Q8R5H6)                      | Q8R5H6 | WASF1_MOUSE | 1  | 0.87  | 2  | 0.74  |   |       |    |      |  |        |
| Wiskott-Aldrich syndrome protein family member 2 (WASP-family protein member 2) (Q8BH43)                      | Q8BH43 | WASF2_MOUSE |    |       | 1  | 0.13  |   |       |    |      |  |        |
| Wnt-2b protein precursor (Wnt-13)                                                                             | O70283 | WNT2B_MOUSE |    |       | 1  | 0.03  |   |       |    |      |  | 22414  |
| WW-domain oxidoreductase (Mus musculus 12 days embryo female mullerian duct in)                               | Q91WL8 | Q91WL8      | 3  | 0.84  | 4  | 1.54  | 1 | 1.50  | 4  | 1.51 |  |        |
| Xaa-Pro dipeptidase (EC 3.4.13.9) (X-Pro dipeptidase) (Proline dipeptidase) (Prolidas)                        | Q11136 | PEPD_MOUSE  |    |       | 1  | 2.24  |   |       | 2  | 0.86 |  | 18624  |
| Xanthine dehydrogenase/oxidase [Includes: Xanthine dehydrogenase (EC 1.1.7.1.4) (XDH)]                        | Q00519 | XDH_MOUSE   | 5  | 2.14  | 5  | 1.45  | 4 | 1.42  | 11 | 1.60 |  | 22436  |
| X-linked interleukin-1 receptor accessory protein-like 1 precursor (IL1RAPL-1)                                | P59823 | IRPL1_MOUSE |    |       |    |       |   |       | 1  | 2.55 |  | 331461 |
| X-linked retinitis pigmentosa GTPase regulator-interacting protein 1 (RPGR-interacting protein)               | Q9EPQ2 | RPGR1_MOUSE |    |       |    |       | 1 | 0.12  |    |      |  | 77945  |
| XPA-binding protein 2                                                                                         | Q9DCD2 | XAB2_MOUSE  | 1  | 1.76  |    |       | 2 | 1.40  | 1  | 0.26 |  | 67439  |
| XPE UV-damaged DNA binding factor (Ddb1 protein)                                                              | Q9QYK0 | Q9QYK0      | 1  | 1.51  | 2  | 1.39  | 2 | 0.84  | 1  | 1.70 |  |        |
| Xpo1 protein                                                                                                  | Q6P5F9 | Q6P5F9      | 1  | 2.56  | 4  | 0.93  |   |       |    |      |  |        |
| Yippee-like protein 5                                                                                         | P62700 | YPEL5_MOUSE |    |       |    |       |   |       | 1  | 0.79 |  | 383295 |
| Zcchc6 protein                                                                                                | Q8CIH3 | Q8CIH3      | 1  | 0.93  |    |       |   |       |    |      |  |        |
| Z-DNA binding protein 1 (Tumor stroma and activated macrophage protein DLM-1)                                 | Q9QY24 | ZBP1_MOUSE  |    |       |    |       |   |       | 1  | 3.74 |  | 58203  |
| Zeta-sarcoglycan (Zeta-SG) (ZSG1)                                                                             | Q8BX51 | SGCZ_MOUSE  |    |       |    |       | 1 | 23.90 |    |      |  | 244431 |
| Zfp406 protein                                                                                                | Q7TS63 | Q7TS63      |    |       | 1  | 1.41  |   |       |    |      |  |        |
| Zfp472 protein                                                                                                | Q8R2M7 | Q8R2M7      |    |       | 1  | 4.50  |   |       |    |      |  |        |
| Zfp598 protein                                                                                                | Q80YR4 | Q80YR4      | 1  | 13.67 |    |       |   |       |    |      |  |        |
| Zinc finger and BTB domain containing protein 5                                                               | Q7TQG0 | ZBTB5_MOUSE |    |       |    |       |   |       | 1  | 1.03 |  | 230119 |
| Zinc finger and BTB domain containing protein 7 (Leukemia/lymphoma related factor)                            | O88939 | ZBTB7_MOUSE |    |       | 1  | 1.41  |   |       |    |      |  | 16969  |
| Zinc finger CCCH type domain containing protein 5                                                             | Q8BL48 | ZNCC5_MOUSE | 2  | 2.62  | 1  | 1.17  | 2 | 1.98  | 2  | 1.45 |  | 217331 |
| Zinc finger CCHC domain containing protein 4                                                                  | Q8BKW4 | ZCHC4_MOUSE |    |       | 1  | 0.19  |   |       |    |      |  | 78796  |
| Zinc finger DHHC domain containing protein 13 (Huntingtin interacting protein 14 related)                     | Q9CWU2 | ZDH13_MOUSE |    |       |    |       |   |       | 1  | 0.95 |  | 243983 |
| Zinc finger DHHC domain containing protein 3 (Golgi-specific DHHC zinc finger protein)                        | Q8R173 | ZDHC3_MOUSE |    |       | 1  | 6.27  |   |       | 1  | 1.06 |  | 69035  |
| Zinc finger DHHC domain containing protein 6 (H4 homolog)                                                     | Q9CPV7 | ZDHC6_MOUSE |    |       | 1  | 3.11  |   |       | 6  | 1.60 |  | 66980  |

|                                                                                         |        |             |   |      |    |       |   |      |    |       |        |
|-----------------------------------------------------------------------------------------|--------|-------------|---|------|----|-------|---|------|----|-------|--------|
| Zinc finger FYVE domain containing protein 1                                            | Q810J8 | ZFYV1_MOUSE |   |      | 1  | 2.32  | 1 | 0.79 | 2  | 0.83  | 217695 |
| Zinc finger FYVE domain containing protein 16 (Endofin) (Endosomal associated FYV       | Q80U44 | ZFY16_MOUSE | 2 | 1.16 | 1  | 0.78  | 1 | 0.68 |    |       | 218441 |
| Zinc finger MYND domain containing protein 10 (BLu protein)                             | Q99ML0 | ZMY10_MOUSE |   |      | 1  | 0.28  |   |      |    |       | 114602 |
| Zinc finger protein                                                                     | O88291 | O88291      |   |      |    |       |   |      | 1  | 0.58  |        |
| Zinc finger protein 161 (Zfp-161) (Zinc finger protein 5) (ZF5)                         | Q08376 | ZF161_MOUSE |   |      | 1  | 19.87 |   |      |    |       | 22666  |
| Zinc finger protein 198 (Fragment)                                                      | Q9CU65 | ZN198_MOUSE |   |      | 1  | 2.67  |   |      | 4  | 3.75  | 76007  |
| Zinc finger protein 261 (DXHXS6673E protein)                                            | Q9JLM4 | ZN261_MOUSE |   |      |    |       |   |      | 2  | 1.46  | 56364  |
| Zinc finger protein 265 (Zinc finger, splicing) (Fragment)                              | Q9R020 | ZN265_MOUSE | 3 | 1.30 | 3  | 1.58  | 2 | 0.85 | 1  | 0.25  | 53861  |
| Zinc finger protein 294 (Zfp-294)                                                       | Q6A009 | ZN294_MOUSE | 1 | 1.57 |    |       | 1 | 1.92 | 1  | 1.48  |        |
| Zinc finger protein 30 (Brain specifically expressed BSG3)                              | Q78FW7 | Q78FW7      |   |      |    |       |   |      | 1  | 11.92 |        |
| Zinc finger protein 330 (Nucleolar autoantigen 36)                                      | Q922H9 | ZN330_MOUSE |   |      | 2  | 1.15  |   |      | 3  | 1.04  | 30932  |
| Zinc finger protein 451                                                                 | Q8C0P7 | ZN451_MOUSE |   |      |    |       |   |      | 1  | 0.58  | 98403  |
| Zinc finger protein 456                                                                 | Q7M6X8 | Q7M6X8      | 1 | 5.53 |    |       |   |      |    |       |        |
| Zinc finger protein 469                                                                 | Q80WC3 | Q80WC3      |   |      |    |       |   |      | 1  | 0.08  |        |
| Zinc finger protein 482 (Zinc finger and BTB domain containing protein 6)               | Q8K088 | ZN482_MOUSE | 1 | 0.02 |    |       |   |      |    |       | 241322 |
| Zinc finger protein 516                                                                 | Q7TSH3 | ZN516_MOUSE |   |      | 1  | 2.11  |   |      |    |       | 329003 |
| Zinc finger protein 91 (Zfp-91) (Zinc finger protein PZF) (Penta Zf protein)            | Q62511 | ZFP91_MOUSE | 1 | 0.50 |    |       |   |      |    |       |        |
| Zinc finger protein GLI3                                                                | Q61602 | GLI3_MOUSE  | 1 | 1.23 |    |       |   |      |    |       | 14634  |
| Zinc finger protein-like 1                                                              | Q9DB43 | ZFPL1_MOUSE | 6 | 1.83 | 6  | 1.26  | 1 | 0.11 | 12 | 0.85  |        |
| Zinc finger RNA binding protein                                                         | Q88532 | Q88532      | 5 | 4.68 | 12 | 2.42  | 5 | 0.66 | 10 | 1.01  |        |
| Zinc finger SWIM domain containing protein 5                                            | Q80TC6 | ZSWM5_MOUSE |   |      | 1  | 0.68  |   |      |    |       | 74464  |
| Zinc finger transcription factor Trps1                                                  | Q925H1 | TRPS1_MOUSE |   |      | 2  | 6.06  |   |      |    |       | 83925  |
| Zinc fingers and homeoboxes protein 2                                                   | Q8C0C0 | ZHX2_MOUSE  | 1 | 0.13 |    |       |   |      |    |       | 387609 |
| Zinc phosphodiesterase ELAC protein 2 (EC 3.1.26.11) (Ribonuclease Z 2) (RNase Z        | Q80Y81 | RNZ2_MOUSE  | 5 | 0.85 | 3  | 1.12  | 2 | 1.03 | 3  | 1.12  | 68626  |
| Zinc transporter 4 (ZnT-4) (Solute carrier family 30, member 4) (Lethal milk protein)   | Q35149 | ZNT4_MOUSE  | 2 | 0.43 | 2  | 1.16  | 2 | 1.17 | 1  | 0.44  | 22785  |
| Zinc-finger protein ubi-d4 (Requiem) (Apoptosis response zinc finger protein) (D4, zin  | Q61103 | REQU_MOUSE  | 2 | 2.90 | 5  | 3.95  |   |      | 4  | 0.98  | 19708  |
| Zinc-finger protein ZPR1 (Zinc finger protein 259)                                      | Q62384 | ZPR1_MOUSE  |   |      |    |       |   |      | 1  | 0.80  | 22687  |
| Zonadhesin precursor                                                                    | O88799 | ZAN_MOUSE   |   |      |    |       |   |      | 1  | 0.21  | 22635  |
| ZW10 interactor (ZW10 interacting protein-1) (Zwint-1)                                  | Q9CQU5 | ZWINT_MOUSE | 1 | 1.51 | 2  | 0.88  | 2 | 2.56 |    |       | 52696  |
| Zyxin related protein-1 (Putative intracellular signaling protein) (TRIP6) (Mus musculu | Q9Z1Y4 | Q9Z1Y4      | 3 | 1.71 | 9  | 2.01  | 4 | 1.13 | 14 | 1.42  |        |
